# Supplementary material for: Integrating Biodiversity Data into Botanic Collections
Source: Biodivers Data J. 2016 May 20;(4):e7971. doi: 10.3897/BDJ.4.e7971 (PMC4910503; doi:10.3897/BDJ.4.e7971)
Supplement: Supplementary material 1 — List of botanic gardens [file biodiversity_data_journal-4-e7971-s001.csv]

Garden Alias	Botanical Garden	Country
ATGBG Graz	Graz	AT
BG Linz	Linz	AT
BGU Innsbruck	University Innsbruck	AT
BGU Salzburg	University Salzburg	AT
BGU Wien	University Wien	AT
BG Baku	Baku	AZ
BG Leuven	Leuven	BE
NBG Meise	National Botanical Garden Meise	BE
BGU Gent	University Gent	BE
BGU Sofia	St. Kliment Ohridski University Sofia	BG
DBGU Alberta	University Alberta, Edmonton	CA
BGU Vancouver	University of British Columbia, Vancouver	CA
CJB Geneva	Geneva	CH
JB Neuchatel	Neuchatel	CH
JB Porrentruy	Porrentruy	CH
BGAS Pruhonice	Academy of Sciences Pruhonice	CZ
BGUFM Brno	Faculty of Medicine Masaryk University Brno	CZ
BGUFS Brno	Faculty of Science Masaryk University Brno	CZ
BGUFS Olomouc	Palacky University Olomouc	CZ
DG Pruhonice	Silva Tarouca, Research Institute Pruhonice	CZ
BG Teplice	Teplice	CZ
FBGU Goettingen	University Göttingen (Forst.BG)	CZ
BGU FTA Prag	University Prague	CZ
BGU Freiburg	Albert-Ludwigs-University Freiburg	DE
BGU Oldenburg	Carl-von-Ossietzky-University Oldenburg	DE
BG Chemnitz	Chemnitz	DE
BGU Kiel	Christian-Albrechts-University Kiel	DE
BGU Erlangen-Nuernberg	Friedrich-Alexander-University Erlangen-Nürnberg	DE
BGU Jena	Friedrich-Schiller-University Jena	DE
EBG Goettingen	Georg-August-University Göttingen (Exp.BG)	DE
BGU Giessen	Justus-Liebig-University Giessen	DE
BGU Karlsruhe	Karlsruhe Institute of Technology	DE
BG Krefeld	Krefeld	DE
BGU Hamburg	Loki-Schmidt-Garten University Hamburg	DE
BGU Halle	Martin-Luther-University Halle-Wittenberg	DE
BG Muenchen	München	DE
BG Frankfurt a.M.	Palmgarten Frankfurt am Main	DE
BGU Bochum	Ruhr-University Bochum	DE
BGTU Braunschweig	Technical University Braunschweig	DE
BGTU Darmstadt	Technical University Darmstadt	DE
OEBGU Bayreuth	University Bayreuth	DE
BGU Bonn	University Bonn	DE
BGU Duisburg-Essen	University Duisburg-Essen	DE
OBEU Ferrara	University Ferrara	DE
BGU Hohenheim	University Hohenheim Stuttgart	DE
BGU Konstanz	University Konstanz	DE
BGU Leipzig	University Leipzig	DE
BGU Osnabrueck	University Osnabrück	DE
BGU Potsdam	University Potsdam	DE
BGU Regensburg	University Regensburg	DE
BGU Rostock	University Rostock	DE
BGU Tuebingen	University Tübingen	DE
BGU Ulm	University Ulm	DE
BGU Muenster	Westfaelische Wilhelms-University Muenster	DE
BGU Aarhus	University Aarhus	DK
BGU Kopenhagen	University Copenhagen	DK
BGU Tartu	University Tartu	EE
JBI Aia	Aia	ES
JBA Gijon	Atlantico, Gijon	ES
Andalusian Seedbank	Banco de Germoplasma Vegetal, Andaluz	ES
JB Barcelona	Barcelona	ES
JBCM Albacete	Castilla la Mancha Albacete	ES
JB Ibi	Ibi (Albacete)	ES
JB Gran Canaria	Las Palmas de Gran Canaria	ES
RJB Madrid	Madrid	ES
CHBG Malaga	Malaga	ES
JBR Najera	Najera	ES
JAO Puerto de la Cruz	Puerto de la Cruz, Tenerife	ES
JB Soller	Soller	ES
BGU Alcala	University Alcala, Madrid	ES
BGU Sierra Nevada	University Sierra Nevada (Granada)	ES
BGU Valencia	University Valencia	ES
BG Joensuu	Joensuu	FI
BGU Oulu	University of Oulu	FI
JB Bordeaux	Bordeaux	FR
BGU Lautaret	Lautaret, University Joseph Fourier Grenoble	FR
JB Lyon	Lyon	FR
JB Paris	Paris	FR
BGU Talence	Talence, University Bordeaux	FR
BGU Caen	University Caen	FR
BGU Montpellier	University Montpellier	FR
BGU Strasbourg	University Strasbourg	FR
BG Batumi	Batumi	GE
BG Gibraltar	Gibraltar	GI
BGU Zagreb	University Zagreb	HR
BGU Nyíregyháza	János Tuzson, Nyíregyháza	HU
BGU Pecs	University Pecs	HU
BG Purwodadi	Institute of Sciences, Purwodadi-Pasuruan	ID
NBG Glasnevin	National Botanical Garden Glasnevin Dublin	IE
BGU Jerusalem	The Hebrew University Jerusalem	IL
NBG Tehran	National Botanical Garden of Iran	IR
BG Akureyri	Akureyri	IS
GBA Rezia Bormio	Alpino Rezia Bormio	IT
GB Daniela Brescia	Daniela Brescia, di S. Eufemia a Maiella	IT
GB Genova	Genova	IT
GB Ventimiglia	Hanbury Ventimiglia	IT
GB Michele Tenore	Michele Tenore Lama dei Peligni	IT
BGU Parma	University Parma	IT
BGU Siena	University Siena	IT
BGU Vilnius	University Vilnius	LT
BGU Kaunas	Vytautas Magnus University Kaunas	LT
BG Luxembourg	National Museum of Natural History	LU
BGU Riga	University Riga	LV
BG Amsterdam	Amsterdam	NL
BGU Delft	University Delft	NL
BGU Utrecht	Utrecht University	NL
BG Stavanger	Stavanger	NO
BGU Poznan	Adam Mickiewicz University, Poznan	PL
BGU Krakow	Jagiellonian University Kraków	PL
MPGU Krakow	Jagiellonian University Kraków (Med)	PL
BGU Warsaw	University Warsaw	PL
MBGPAS Zakopane	Zakopane	PL
BG Montoso	Montoso Gardens, Puerto Rico	PR
JBM Funchal	Funchal	PT
JB Horta	Horta	PT
JBA Lisboa	Instituto superior de Agronomia, Lisboa	PT
PBA Lisboa	Instituto superior de Agronomia, Lisboa (Parque)	PT
JBT Lisboa	Largo dos Jerónimos, Lisboa	PT
JB Lisboa	Rua da Escola Politécnica, Lisboa	PT
BGU Alexandru Borza	Alexandru Borza, Babes-Bolyai University Cluj-Napoca	RO
BGU Iasi	Anastasie Fatu, Alexandru Ioan Cuza University Iasi	RO
BGU Cluj-Napoca	University of Agr. Sci. and Vet. Med., Cluj-Napoca	RO
BGU Perm	Perm State National Research University	RU
BGU Petrozavodsk	Petrozavodsk State University, Karelia	RU
BGRAS Amur	Russian Academy of Sciences Amur	RU
BGU Kosice	Pavol Jozef Šafárik University Košice	SK
BGU Nitra	University of Agriculture Nitra	SK
BGU Leopolis	Joanni Franko University Leopolis	UA
BGNAS Donetsk	National Academy of Sciences Donetsk	UA
BGU Kiev	University Kiev	UA
Chelsea Physic Garden	Chelsea Physic Garden, London	UK
BG Denver	Denver Botanic Gardens	US
MBG Saint Louis	Missouri, Saint Louis	US
Stonecrop Garden	Stonecrop Gardens, New York	US
WA New Jersey	Willowwood Arboretum, New Jersey	US
