# Supplementary material for: Integrating Biodiversity Data into Botanic Collections
Source: Biodivers Data J. 2016 May 20;(4):e7971. doi: 10.3897/BDJ.4.e7971 (PMC4910503; doi:10.3897/BDJ.4.e7971)
Supplement: Supplementary material 2 — Unique Taxon Name List [file biodiversity_data_journal-4-e7971-s002.csv]

Family	Genus	Taxon
Caprifoliaceae	Abelia	Abelia chinensis
Caprifoliaceae	Abelia	Abelia x grandiflora
Caprifoliaceae	Abelia	Abelia mosanensis
Caprifoliaceae	Abelia	Abelia triflora
Not Found	Abeliophyllum	Abeliophyllum distichum
Malvaceae	Hibiscus	Hibiscus esculentus
Malvaceae	Abelmoschus	Abelmoschus manihot
Malvaceae	Abelmoschus	Abelmoschus moschatus
Pinaceae	Abies	Abies alba
Pinaceae	Abies	Abies balsamea
Pinaceae	Abies	Abies cephalonica
Pinaceae	Abies	Abies cilicica
Pinaceae	Abies	Abies concolor var. concolor
Pinaceae	Abies	Abies firma
Pinaceae	Abies	Abies holophylla
Pinaceae	Abies	Abies koreana
Pinaceae	Abies	Abies bornmuelleriana
Pinaceae	Abies	Abies nordmanniana
Pinaceae	Abies	Abies numidica
Pinaceae	Abies	Abies pinsapo
Pinaceae	Abies	Abies procera
Pinaceae	Abies	Abies sibirica
Malvaceae	Abroma	Abroma augustum
Nyctaginaceae	Abronia	Abronia fragrans
Leguminosae	Abrus	Abrus precatorius
Leguminosae	Abrus	Abrus schimperi
Malvaceae	Abutilon	Abutilon darwinii
Malvaceae	Abutilon	Abutilon grandifolium
Malvaceae	Abutilon	Abutilon indicum
Malvaceae	Abutilon	Abutilon megapotanicum
Malvaceae	Abutilon	Abutilon mollissimum
Malvaceae	Abutilon	Abutilon arboreum
Malvaceae	Abutilon	Abutilon theophrasti
Leguminosae	Acacia	Acacia adunca
Leguminosae	Acacia	Acacia aestivalis
Leguminosae	Acacia	Acacia boormanii
Leguminosae	Acacia	Acacia brachystachya
Leguminosae	Acacia	Acacia calamifolia
Leguminosae	Acacia	Acacia cardiophylla
Leguminosae	Acacia	Acacia catechu
Leguminosae	Acacia	Acacia catechu f. cornigera
Leguminosae	Acacia	Acacia cavenia
Leguminosae	Acacia	Acacia cyclops
Leguminosae	Acacia	Acacia dealbata
Leguminosae	Acacia	Acacia deanei
Leguminosae	Acacia	Acacia decurrens
Leguminosae	Acacia	Acacia dodonaeifolia
Leguminosae	Acacia	Acacia elata
Leguminosae	Acacia	Acacia farnesiana
Leguminosae	Acacia	Acacia fimbriata
Leguminosae	Acacia	Acacia glaucoptera
Leguminosae	Acacia	Acacia iteaphylla
Leguminosae	Acacia	Acacia julifera
Leguminosae	Acacia	Acacia karroo
Leguminosae	Acacia	Acacia leprosa
Leguminosae	Acacia	Acacia littorea
Leguminosae	Acacia	Acacia longifolia
Leguminosae	Acacia	Acacia macradenia
Leguminosae	Acacia	Acacia mearnsii
Leguminosae	Acacia	Acacia melanoxylon
Leguminosae	Acacia	Acacia menzelii
Leguminosae	Acacia	Acacia montana
Leguminosae	Acacia	Acacia nilotica subsp. leiocarpa
Leguminosae	Acacia	Acacia armata
Leguminosae	Acacia	Acacia pendula
Leguminosae	Acacia	Acacia perangusta
Leguminosae	Acacia	Acacia podalyriifolia
Leguminosae	Acacia	Acacia parvissima
Leguminosae	Acacia	Acacia prominens
Leguminosae	Acacia	Acacia pubescens
Leguminosae	Acacia	Acacia redolens
Leguminosae	Acacia	Acacia retinoides
Leguminosae	Acacia	Acacia rubida
Leguminosae	Acacia	Acacia saligna
Leguminosae	Acacia	Acacia sertiformis
Leguminosae	Acacia	Acacia sieberiana
Leguminosae	Acacia	Acacia spectabilis
Leguminosae	Acacia	Acacia triptera
Leguminosae	Acacia	Acacia verticillata
Leguminosae	Acacia	Acacia visco
Rosaceae	Acaena	Acaena anserinifolia
Rosaceae	Acaena	Acaena antarctica
Rosaceae	Acaena	Acaena argentea
Rosaceae	Acaena	Acaena buchananii
Rosaceae	Acaena	Acaena caesiiglauca
Rosaceae	Acaena	Acaena cespitosa
Rosaceae	Acaena	Acaena fissistipula
Rosaceae	Acaena	Acaena magellanica
Rosaceae	Acaena	Acaena microphylla
Rosaceae	Acaena	Acaena minor
Rosaceae	Acaena	Acaena hieronymi
Rosaceae	Acaena	Acaena novae-zelandiae
Rosaceae	Acaena	Acaena ovalifolia
Rosaceae	Acaena	Acaena ovina subsp. maxima
Rosaceae	Acaena	Acaena pallida
Rosaceae	Acaena	Acaena pinnatifida
Rosaceae	Acaena	Acaena platyacantha
Rosaceae	Acaena	Acaena poeppigiana
Rosaceae	Acaena	Acaena saccaticupula
Rosaceae	Acaena	Acaena sericea
Rosaceae	Acaena	Acaena viridior
Euphorbiaceae	Acalypha	Acalypha amentacea var. amentacea
Euphorbiaceae	Acalypha	Acalypha hispida
Euphorbiaceae	Acalypha	Acalypha virginica
Cactaceae	Acanthocalycium	Acanthocalycium spiniflorum
Plumbaginaceae	Acantholimon	Acantholimon acerosum
Plumbaginaceae	Acantholimon	Acantholimon araxanum
Plumbaginaceae	Acantholimon	Acantholimon armenum
Plumbaginaceae	Acantholimon	Acantholimon bracteatum var. capitatum
Plumbaginaceae	Acantholimon	Acantholimon caryophyllaceum
Plumbaginaceae	Acantholimon	Acantholimon glumaceum
Plumbaginaceae	Acantholimon	Acantholimon hohenackeri
Plumbaginaceae	Acantholimon	Acantholimon kotschyi
Plumbaginaceae	Acantholimon	Acantholimon litvinovii
Plumbaginaceae	Acantholimon	Acantholimon ulicinum var. purpurescens
Plumbaginaceae	Acantholimon	Acantholimon venustum
Cactaceae	Acantholobivia	Acantholobivia tegeleriana
Lamiaceae	Ballota	Ballota frutescens
Compositae	Acanthospermum	Acanthospermum hispidum
Bromeliaceae	Acanthostachys	Acanthostachys pitcairnioides
Bromeliaceae	Acanthostachys	Acanthostachys strobilacea
Acanthaceae	Acanthus	Acanthus dioscoridis var. perringii
Acanthaceae	Acanthus	Acanthus hungaricus
Acanthaceae	Acanthus	Acanthus ilicifolius
Acanthaceae	Acanthus	Acanthus longifolius
Acanthaceae	Acanthus	Acanthus mollis subsp. mollis
Acanthaceae	Acanthus	Acanthus montanus
Acanthaceae	Acanthus	Acanthus spinosus
Myrtaceae	Acca	Acca sellowiana
Sapindaceae	Acer	Acer barbinerve
Sapindaceae	Acer	Acer buergerianum
Sapindaceae	Acer	Acer campestre
Sapindaceae	Acer	Acer austriacum
Sapindaceae	Acer	Acer velutinum var. vanvolxemii
Sapindaceae	Acer	Acer capillipes
Sapindaceae	Acer	Acer cappadocicum
Sapindaceae	Acer	Acer cappadocicum subsp. lobelii
Sapindaceae	Acer	Acer carpinifolium
Sapindaceae	Acer	Acer circinatum
Sapindaceae	Acer	Acer cissifolium
Sapindaceae	Acer	Acer davidii
Sapindaceae	Acer	Acer diabolicum f. purpurascens
Sapindaceae	Acer	Acer distylum
Sapindaceae	Acer	Acer erianthum
Sapindaceae	Acer	Acer glabrum
Sapindaceae	Acer	Acer granatense
Sapindaceae	Acer	Acer griseum
Sapindaceae	Acer	Acer grosseri
Sapindaceae	Acer	Acer grosseri var. hersii
Sapindaceae	Acer	Acer heldreichii
Sapindaceae	Acer	Acer trautvetteri
Sapindaceae	Acer	Acer henryi
Sapindaceae	Acer	Acer hyrcanum
Sapindaceae	Acer	Acer japonicum
Sapindaceae	Acer	Acer laevigatum
Sapindaceae	Acer	Acer macrophyllum
Sapindaceae	Acer	Acer mandshuricum
Sapindaceae	Acer	Acer maximowiczianum
Sapindaceae	Acer	Acer micranthum
Sapindaceae	Acer	Acer miyabei
Sapindaceae	Acer	Acer monspessulanum
Sapindaceae	Acer	Acer ibericum
Sapindaceae	Acer	Acer negundo
Sapindaceae	Acer	Acer negundo subsp. californicum
Sapindaceae	Acer	Acer oblongum
Sapindaceae	Acer	Acer campestre subsp. campestre
Sapindaceae	Acer	Acer oliverianum
Sapindaceae	Acer	Acer opalus subsp. obtusatum
Sapindaceae	Acer	Acer opalus
Sapindaceae	Acer	Acer palmatum
Sapindaceae	Acer	Acer laxiflorum
Sapindaceae	Acer	Acer pennsylvanicum
Sapindaceae	Acer	Acer mono
Sapindaceae	Acer	Acer platanoides
Sapindaceae	Acer	Acer platanoides subsp. turkestanicum
Sapindaceae	Acer	Acer pseudoplatanus
Sapindaceae	Acer	Acer pseudo-sieboldianum
Sapindaceae	Acer	Acer rubrum
Sapindaceae	Acer	Acer rufinerve
Sapindaceae	Acer	Acer saccharinum
Sapindaceae	Acer	Acer saccharum
Sapindaceae	Acer	Acer grandidentatum
Sapindaceae	Acer	Acer sempervirens
Sapindaceae	Acer	Acer shirasawanum
Sapindaceae	Acer	Acer sieboldianum
Sapindaceae	Acer	Acer spicatum
Sapindaceae	Acer	Acer aizuense
Sapindaceae	Acer	Acer semenovii
Sapindaceae	Acer	Acer tataricum
Sapindaceae	Acer	Acer tataricum subsp. ginnala
Sapindaceae	Acer	Acer tegmentosum
Sapindaceae	Acer	Acer truncatum
Sapindaceae	Acer	Acer obtusifolium subsp. syriacum
Sapindaceae	Acer	Acer velutinum
Sapindaceae	Acer	Acer turcestanica
Compositae	Achillea	Achillea abrotanoides
Compositae	Achillea	Achillea aegyptiaca
Compositae	Achillea	Achillea serbica
Compositae	Achillea	Achillea ageratifolia
Compositae	Achillea	Achillea ageratum
Compositae	Achillea	Achillea sibirica var. camtschatica
Compositae	Achillea	Achillea alpina subsp. pulchra
Compositae	Achillea	Achillea sibirica
Compositae	Achillea	Achillea asiatica
Compositae	Achillea	Achillea asplenifolia
Compositae	Achillea	Achillea atrata
Compositae	Achillea	Achillea barrelieri subsp. barrelieri
Compositae	Achillea	Achillea biserrata
Compositae	Achillea	Achillea chrysocoma
Compositae	Achillea	Achillea clavennae
Compositae	Achillea	Achillea clusiana
Compositae	Achillea	Achillea clypeolata
Compositae	Achillea	Achillea collina
Compositae	Achillea	Achillea crithmifolia
Compositae	Achillea	Achillea distans
Compositae	Achillea	Achillea erba-rotta subsp. ambigua
Compositae	Achillea	Achillea erba-rotta subsp. moschata
Compositae	Achillea	Achillea erba-rotta
Compositae	Achillea	Achillea filipendulina
Compositae	Achillea	Achillea glaberrima
Compositae	Achillea	Achillea grandifolia
Compositae	Achillea	Achillea latiloba
Compositae	Achillea	Achillea ligustica
Compositae	Achillea	Achillea lingulata
Compositae	Achillea	Achillea macrophylla
Compositae	Achillea	Achillea millefolium
Compositae	Achillea	Achillea nana
Compositae	Achillea	Achillea nobilis
Compositae	Achillea	Achillea ochroleuca
Compositae	Achillea	Achillea odorata
Compositae	Achillea	Achillea barrelieri subsp. oxyloba
Compositae	Achillea	Achillea ptarmica
Compositae	Achillea	Achillea grandiflora
Compositae	Achillea	Achillea pyrenaica
Compositae	Achillea	Achillea pannonica
Compositae	Achillea	Achillea setacea
Compositae	Achillea	Achillea sibirica var. pulchra
Compositae	Achillea	Achillea taygetea
Compositae	Achillea	Achillea tenuifolia
Compositae	Achillea	Achillea thomasiana
Compositae	Achillea	Achillea thracica
Compositae	Achillea	Achillea tomentosa
Compositae	Achillea	Achillea umbellata
Compositae	Achillea	Achillea vermicularis
Compositae	Achillea	Achillea tenorii
Gesneriaceae	Achimenes	Achimenes coccinea var. coccinea
Gesneriaceae	Achimenes	Achimenes coccinea
Poaceae	Achnatherum	Achnatherum brachytrichum
Not Found	Achyrachaena	Achyrachaena mollis
Amaranthaceae	Achyranthes	Achyranthes aspera
Amaranthaceae	Achyranthes	Achyranthes bidentata
Calyceraceae	Acicarpha	Acicarpha tribuloides
Lamiaceae	Acinos	Acinos alpinus
Apiaceae	Aciphylla	Aciphylla aurea
Compositae	Acmella	Acmella oleracea
Arecaceae	Acoelorrhaphe	Acoelorrhaphe wrightii
Apocynaceae	Acokanthera	Acokanthera oblongifolia
Apocynaceae	Acokanthera	Acokanthera oppositifolia
Ranunculaceae	Aconitum	Aconitum alboviolaceum
Ranunculaceae	Aconitum	Aconitum anthora
Ranunculaceae	Aconitum	Aconitum barbatum
Ranunculaceae	Aconitum	Aconitum carmichaelii
Ranunculaceae	Aconitum	Aconitum chasmanthum
Ranunculaceae	Aconitum	Aconitum columbianum
Ranunculaceae	Aconitum	Aconitum decipiens
Ranunculaceae	Aconitum	Aconitum variegatum subsp. paniculatum
Ranunculaceae	Aconitum	Aconitum delphinifolium
Ranunculaceae	Aconitum	Aconitum ferox
Ranunculaceae	Aconitum	Aconitum firmum
Ranunculaceae	Aconitum	Aconitum fischeri
Ranunculaceae	Aconitum	Aconitum napellus var. lobelianum
Ranunculaceae	Aconitum	Aconitum jaluense
Ranunculaceae	Aconitum	Aconitum japonicum
Ranunculaceae	Aconitum	Aconitum japonicum subsp. subcuneatum
Ranunculaceae	Aconitum	Aconitum krylovii
Ranunculaceae	Aconitum	Aconitum kusnezoffii
Ranunculaceae	Aconitum	Aconitum x platanifolium
Ranunculaceae	Aconitum	Aconitum lycoctonum subsp. lasiostomum
Ranunculaceae	Aconitum	Aconitum leucostomum
Ranunculaceae	Aconitum	Aconitum loczyanum
Ranunculaceae	Aconitum	Aconitum rogoviczii
Ranunculaceae	Aconitum	Aconitum lycoctonum subsp. lasiostonum
Ranunculaceae	Aconitum	Aconitum metajaponicum
Ranunculaceae	Aconitum	Aconitum moldavicum
Ranunculaceae	Aconitum	Aconitum napellus
Ranunculaceae	Aconitum	Aconitum compactum
Ranunculaceae	Aconitum	Aconitum napellus subsp. napellus
Ranunculaceae	Aconitum	Aconitum variegatum subsp. variegatum
Ranunculaceae	Aconitum	Aconitum napellus subsp. corsicum
Ranunculaceae	Aconitum	Aconitum nasutum
Ranunculaceae	Aconitum	Aconitum orientale
Ranunculaceae	Aconitum	Aconitum callibotryon
Ranunculaceae	Aconitum	Aconitum yezoense
Ranunculaceae	Aconitum	Aconitum sachalinense
Ranunculaceae	Aconitum	Aconitum sczukinii
Ranunculaceae	Aconitum	Aconitum exelsum
Ranunculaceae	Aconitum	Aconitum autumnale
Ranunculaceae	Aconitum	Aconitum umbrosum
Ranunculaceae	Aconitum	Aconitum uncinatum
Ranunculaceae	Aconitum	Aconitum grignae
Ranunculaceae	Aconitum	Aconitum variegatum
Ranunculaceae	Aconitum	Aconitum villosum
Ranunculaceae	Aconitum	Aconitum volubile
Ranunculaceae	Aconitum	Aconitum lycoctonum subsp. vulparia
Polygonaceae	Aconogonon	Aconogonon divaricatum
Acoraceae	Acorus	Acorus calamus
Acoraceae	Acorus	Acorus gramineus
Rutaceae	Acronychia	Acronychia pedunculata
Pteridaceae	Acrostichum	Acrostichum aureum
Ranunculaceae	Actaea	Actaea asiatica
Ranunculaceae	Cimicifuga	Cimicifuga foetida
Ranunculaceae	Cimicifuga	Cimicifuga racemosa subsp. cordifolia
Ranunculaceae	Cimicifuga	Cimicifuga dahurica
Ranunculaceae	Actaea	Actaea rubra f. reglecta
Ranunculaceae	Actaea	Actaea europaea
Ranunculaceae	Actaea	Actaea japonica
Ranunculaceae	Actaea	Actaea pachypoda
Ranunculaceae	Actaea	Actaea pachypoda f. rubrocarpa
Ranunculaceae	Actaea	Actaea podocarpa
Ranunculaceae	Actaea	Actaea racemosa
Ranunculaceae	Actaea	Actaea rubra
Ranunculaceae	Actaea	Actaea rubra f. neglecta
Ranunculaceae	Actaea	Actaea erythrocarpa var. leucocarpa
Ranunculaceae	Cimicifuga	Cimicifuga simplex
Ranunculaceae	Actaea	Actaea spicata
Phyllanthaceae	Actephila	Actephila javanica
Actinidiaceae	Actinidia	Actinidia arguta
Actinidiaceae	Actinidia	Actinidia purpurea
Actinidiaceae	Actinidia	Actinidia chinensis
Actinidiaceae	Actinidia	Actinidia kolomicta
Actinidiaceae	Actinidia	Actinidia melanandra
Actinidiaceae	Actinidia	Actinidia polygama
Pteridaceae	Actiniopteris	Actiniopteris semiflabellata
Lauraceae	Actinodaphne	Actinodaphne angustifolia
Arecaceae	Actinorhytis	Actinorhytis calapparia
Not Found	Ada	Ada ovalifolia
Malvaceae	Adansonia	Adansonia digitata
Leguminosae	Adenanthera	Adenanthera pavonina
Apocynaceae	Adenium	Adenium obesum
Leguminosae	Adenocarpus	Adenocarpus decorti
Leguminosae	Adenocarpus	Adenocarpus decorticans
Leguminosae	Adenocarpus	Adenocarpus foliolosus
Compositae	Adenocaulon	Adenocaulon chilense
Campanulaceae	Adenophora	Adenophora khasiana
Campanulaceae	Adenophora	Adenophora koreana
Campanulaceae	Adenophora	Adenophora liliifolia
Campanulaceae	Adenophora	Adenophora nikoensis
Campanulaceae	Adenophora	Adenophora pereskiifolia
Campanulaceae	Adenophora	Adenophora stenanthina
Campanulaceae	Adenophora	Adenophora stricta
Campanulaceae	Adenophora	Adenophora confusa
Campanulaceae	Adenophora	Adenophora taquetii
Campanulaceae	Adenophora	Adenophora kurilensis
Campanulaceae	Adenophora	Adenophora triphylla var. japonica
Rosaceae	Adenorachis	Adenorachis arbutifolia
Compositae	Adenostyles	Adenostyles alliariae
Compositae	Adenostyles	Adenostyles glabra
Compositae	Adenostyles	Adenostyles australis
Compositae	Adenostyles	Adenostyles glabra subsp. glabra
Pteridaceae	Adiantum	Adiantum affine
Pteridaceae	Adiantum	Adiantum amplum
Pteridaceae	Adiantum	Adiantum formosum
Pteridaceae	Adiantum	Adiantum capillus-veneris
Pteridaceae	Adiantum	Adiantum caudatum
Pteridaceae	Adiantum	Adiantum concinnum
Pteridaceae	Adiantum	Adiantum cunninghamii
Pteridaceae	Adiantum	Adiantum diaphanum
Pteridaceae	Adiantum	Adiantum hispidulum
Pteridaceae	Adiantum	Adiantum jordanii
Pteridaceae	Adiantum	Adiantum macrophyllum
Pteridaceae	Adiantum	Adiantum pedatum
Pteridaceae	Adiantum	Adiantum peruvianum
Pteridaceae	Adiantum	Adiantum polyphyllum
Pteridaceae	Adiantum	Adiantum raddianum
Pteridaceae	Adiantum	Adiantum reniforme var. reniforme
Pteridaceae	Adiantum	Adiantum subcordatum
Pteridaceae	Adiantum	Adiantum tenerum
Pteridaceae	Adiantum	Adiantum tetraphyllum
Pteridaceae	Adiantum	Adiantum trapeziforme
Pteridaceae	Adiantum	Adiantum venustum
Papaveraceae	Adlumia	Adlumia fungosa
Not Found	Adonidia	Adonidia merrillii
Ranunculaceae	Adonis	Adonis aestivalis
Ranunculaceae	Adonis	Adonis annua
Ranunculaceae	Adonis	Adonis annua subsp. annua
Ranunculaceae	Adonis	Adonis chrysocyathus
Ranunculaceae	Adonis	Adonis brevistyla
Ranunculaceae	Adonis	Adonis flammea
Ranunculaceae	Adonis	Adonis pyrenaica
Ranunculaceae	Adonis	Adonis vernalis
Ranunculaceae	Adonis	Adonis volgensis
Adoxaceae	Adoxa	Adoxa moschatellina
Bromeliaceae	Aechmea	Aechmea angustifolia
Bromeliaceae	Aechmea	Aechmea bracteata
Bromeliaceae	Aechmea	Aechmea conspicuiarmata
Bromeliaceae	Aechmea	Aechmea calyculata
Bromeliaceae	Aechmea	Aechmea candida
Bromeliaceae	Aechmea	Aechmea cariocae
Bromeliaceae	Aechmea	Aechmea coelestis
Bromeliaceae	Aechmea	Aechmea comata
Bromeliaceae	Aechmea	Aechmea dactylina
Bromeliaceae	Aechmea	Aechmea fasciata
Bromeliaceae	Aechmea	Aechmea filicaulis
Bromeliaceae	Aechmea	Aechmea fulgens
Bromeliaceae	Aechmea	Aechmea gigantea
Bromeliaceae	Aechmea	Aechmea lagenaria
Bromeliaceae	Aechmea	Aechmea luddemanniana
Bromeliaceae	Aechmea	Aechmea mariae-reginae
Bromeliaceae	Aechmea	Aechmea megalantha
Bromeliaceae	Aechmea	Aechmea nudicaulis var. nudicaulis
Bromeliaceae	Aechmea	Aechmea penduliflora
Bromeliaceae	Aechmea	Aechmea recurvata
Bromeliaceae	Aechmea	Aechmea sphaerocephala
Bromeliaceae	Aechmea	Aechmea veitchii
Bromeliaceae	Aechmea	Aechmea weberbaueri
Bromeliaceae	Aechmea	Aechmea weilbachii
Poaceae	Aegilops	Aegilops cylindrica
Poaceae	Aegilops	Aegilops geniculata
Poaceae	Triticum	Triticum lorentii
Poaceae	Triticum	Triticum ovatum
Poaceae	Aegilops	Aegilops speltoides
Poaceae	Aegilops	Aegilops tauschii
Poaceae	Aegilops	Aegilops triuncialis
Poaceae	Aegilops	Aegilops ventricosa
Orobanchaceae	Aeginetia	Aeginetia indica
Rutaceae	Aegle	Aegle marmelos
Apiaceae	Aegopodium	Aegopodium podagraria
Crassulaceae	Aeonium	Aeonium arboreum var. rubrolineatum
Crassulaceae	Aeonium	Aeonium arboreum
Crassulaceae	Aeonium	Aeonium aureum
Crassulaceae	Aeonium	Aeonium canariense
Crassulaceae	Aeonium	Aeonium canariense var. palmense
Crassulaceae	Aeonium	Aeonium castello-paivae
Crassulaceae	Aeonium	Aeonium ciliatum
Crassulaceae	Aeonium	Aeonium decorum
Crassulaceae	Aeonium	Aeonium glandulosum
Crassulaceae	Aeonium	Aeonium glutinosum
Crassulaceae	Aeonium	Aeonium haworthii
Crassulaceae	Aeonium	Aeonium lindleyi
Crassulaceae	Aeonium	Aeonium viscatum
Crassulaceae	Aeonium	Aeonium percarneum
Crassulaceae	Aeonium	Aeonium percarneum var. percarneum
Crassulaceae	Aeonium	Aeonium saundersii
Crassulaceae	Aeonium	Aeonium sedifolium
Crassulaceae	Aeonium	Aeonium simsii
Crassulaceae	Aeonium	Aeonium spathulatum
Crassulaceae	Aeonium	Aeonium undulatum
Crassulaceae	Aeonium	Aeonium valverdense
Amaranthaceae	Aerva	Aerva scandens
Gesneriaceae	Aeschynanthus	Aeschynanthus marmoratus
Gesneriaceae	Aeschynanthus	Aeschynanthus parasiticus
Gesneriaceae	Aeschynanthus	Aeschynanthus speciosus
Sapindaceae	Aesculus	Aesculus californica
Sapindaceae	Aesculus	Aesculus x carnea
Sapindaceae	Aesculus	Aesculus flava
Sapindaceae	Aesculus	Aesculus glabra
Sapindaceae	Aesculus	Aesculus hippocastanum
Sapindaceae	Aesculus	Aesculus indica
Sapindaceae	Aesculus	Aesculus parviflora
Sapindaceae	Aesculus	Aesculus pavia
Sapindaceae	Aesculus	Aesculus turbinata
Not Found	Aethephyllum	Aethephyllum pinnatifidum
Brassicaceae	Aethionema	Aethionema armenum
Brassicaceae	Aethionema	Aethionema capitatum
Brassicaceae	Aethionema	Aethionema carneum
Brassicaceae	Aethionema	Aethionema coridifolium
Brassicaceae	Aethionema	Aethionema grandiflorum
Brassicaceae	Aethionema	Aethionema iberideum
Brassicaceae	Aethionema	Aethionema oppositifolium
Brassicaceae	Aethionema	Aethionema saxatile
Brassicaceae	Aethionema	Aethionema schistosum
Brassicaceae	Aethionema	Aethionema thomasianum
Apiaceae	Aethusa	Aethusa cynapium
Zingiberaceae	Aframomum	Aframomum chrysanthum
Zingiberaceae	Aframomum	Aframomum melegueta
Podocarpaceae	Podocarpus	Podocarpus falcatus
Podocarpaceae	Afrocarpus	Afrocarpus mannii
Leguminosae	Afzelia	Afzelia quanzensis
Leguminosae	Afzelia	Afzelia xylocarpa
Amaryllidaceae	Agapanthus	Agapanthus africanus
Amaryllidaceae	Agapanthus	Agapanthus campanulatus subsp. patens
Amaryllidaceae	Agapanthus	Agapanthus campanulatus
Amaryllidaceae	Agapanthus	Agapanthus praecox subsp. orientalis
Amaryllidaceae	Agapanthus	Agapanthus praecox
Lamiaceae	Lophanthus	Lophanthus anisatus
Lamiaceae	Agastache	Agastache mexicana
Lamiaceae	Agastache	Agastache rugosa
Lamiaceae	Agastache	Agastache scrophulariifolia
Lamiaceae	Agastache	Agastache urticifolia
Araucariaceae	Agathis	Agathis borneensis
Araucariaceae	Agathis	Agathis robusta
Asparagaceae	Agave	Agave americana subsp. americana
Asparagaceae	Agave	Agave americana var. aureo
Asparagaceae	Agave	Agave attenuata
Asparagaceae	Agave	Agave celsii var. celsii
Asparagaceae	Agave	Agave deserti
Asparagaceae	Agave	Agave ellemeetiana
Asparagaceae	Agave	Agave filifera
Asparagaceae	Agave	Agave gigantensis
Asparagaceae	Agave	Agave macroacantha
Asparagaceae	Agave	Agave marginata
Asparagaceae	Agave	Agave mitis var. mitis
Asparagaceae	Agave	Agave mitis var. albicans
Asparagaceae	Agave	Agave nizandensis
Asparagaceae	Agave	Agave ocahui
Asparagaceae	Agave	Agave parryi
Asparagaceae	Agave	Agave polianthiflora
Asparagaceae	Agave	Agave potatorum var. verschaffeltii
Asparagaceae	Agave	Agave filifera subsp. schidigera
Asparagaceae	Agave	Agave schottii
Asparagaceae	Agave	Agave striata subsp. stricta
Asparagaceae	Agave	Agave titanota
Asparagaceae	Agave	Agave lophantha
Asparagaceae	Agave	Agave victoriae-reginae
Asparagaceae	Agave	Agave vivipara
Compositae	Ageratina	Ageratina adenophora
Compositae	Ageratina	Ageratina altissima
Compositae	Ageratina	Ageratina aromatica
Compositae	Eupatorium	Eupatorium rugosum
Compositae	Eupatorium	Eupatorium micrantum
Compositae	Eupatorium	Eupatorium occidentale
Compositae	Eupatorium	Eupatorium viburnoides
Compositae	Ageratum	Ageratum conyzoides
Compositae	Ageratum	Ageratum houstonianum
Meliaceae	Aglaia	Aglaia elliptica
Polypodiaceae	Aglaomorpha	Aglaomorpha drynarioides
Polypodiaceae	Aglaomorpha	Aglaomorpha heraclea
Polypodiaceae	Aglaomorpha	Aglaomorpha leporella
Polypodiaceae	Aglaomorpha	Aglaomorpha meyeniana
Polypodiaceae	Aglaomorpha	Aglaomorpha novoguineensis
Araceae	Aglaonema	Aglaonema commutatum
Araceae	Aglaonema	Aglaonema commutatum var. warburgii
Araceae	Aglaonema	Aglaonema costatum
Araceae	Aglaonema	Aglaonema crispum
Araceae	Aglaonema	Aglaonema modestum
Araceae	Aglaonema	Aglaonema siamense
Araceae	Aglaonema	Aglaonema treubii f. latifolium
Compositae	Agoseris	Agoseris aurantiaca
Compositae	Agoseris	Agoseris glauca
Rosaceae	Agrimonia	Agrimonia coreana
Rosaceae	Agrimonia	Agrimonia eupatoria
Rosaceae	Agrimonia	Agrimonia asiatica
Rosaceae	Agrimonia	Agrimonia odorata
Rosaceae	Agrimonia	Agrimonia gryposepala
Rosaceae	Agrimonia	Agrimonia parviflora
Rosaceae	Agrimonia	Agrimonia japonica
Rosaceae	Agrimonia	Agrimonia procera
Rosaceae	Agrimonia	Agrimonia repens
Poaceae	Agropyron	Agropyron pectiniforme
Poaceae	Agropyron	Agropyron desertorum
Caryophyllaceae	Agrostemma	Agrostemma brachyloba
Caryophyllaceae	Agrostemma	Agrostemma githago
Poaceae	Agrostis	Agrostis canina
Poaceae	Agrostis	Agrostis capillaris
Poaceae	Agrostis	Agrostis gigantea
Poaceae	Agrostis	Agrostis nevadensis
Poaceae	Agrostis	Agrostis rupestris subsp. pyrenaicus
Poaceae	Agrostis	Agrostis rupestris
Poaceae	Agrostis	Agrostis rupestris subsp. rupestris
Poaceae	Agrostis	Agrostis stolonifera
Crassulaceae	Aichryson	Aichryson bollei
Crassulaceae	Aeonium	Aeonium domesticum
Crassulaceae	Aichryson	Aichryson laxum
Crassulaceae	Aichryson	Aichryson pachycaulon
Crassulaceae	Aichryson	Aichryson punctatum
Crassulaceae	Aeonium	Aeonium tortuosum
Simaroubaceae	Ailanthus	Ailanthus altissima
Compositae	Ainsliaea	Ainsliaea acerifolia var. subapoda
Compositae	Ainsliaea	Ainsliaea fragrans
Apiaceae	Ainsworthia	Ainsworthia trachycarpa
Arecaceae	Aiphanes	Aiphanes aculeata
Poaceae	Aira	Aira caryophyllea
Poaceae	Aira	Aira elegantissima
Poaceae	Aira	Aira praecox
Aizoaceae	Aizoon	Aizoon canariense
Lamiaceae	Ajuga	Ajuga chamaepitys
Lamiaceae	Ajuga	Ajuga genevensis
Lamiaceae	Ajuga	Ajuga pyramidalis
Lamiaceae	Ajuga	Ajuga reptans f. atropurpurea
Lamiaceae	Ajuga	Ajuga reptans
Lardizabalaceae	Akebia	Akebia quinata
Lardizabalaceae	Akebia	Akebia trifoliata
Cornaceae	Alangium	Alangium javanicum
Cornaceae	Alangium	Alangium platanifolium
Not Found	Alberta	Alberta alpine
Leguminosae	Albizia	Albizia acle
Leguminosae	Albizia	Albizia carrii
Leguminosae	Albizia	Albizia julibrissin
Not Found	Albizzia	Albizzia kalkora
Asparagaceae	Albuca	Albuca angolensis
Asparagaceae	Albuca	Albuca bracteata
Asparagaceae	Albuca	Albuca humilis
Asparagaceae	Albuca	Albuca longipes
Asparagaceae	Albuca	Albuca shawii
Malvaceae	Alcea	Alcea excubita
Malvaceae	Althaea	Althaea froloviana
Malvaceae	Alcea	Alcea litwinowii
Malvaceae	Alcea	Alcea rosea
Malvaceae	Alcea	Alcea rosea var. plena
Malvaceae	Alcea	Alcea rosea subsp. ficifolia
Malvaceae	Alcea	Alcea rugosa
Malvaceae	Alcea	Alcea setosa
Rosaceae	Alchemilla	Alchemilla acutiloba
Rosaceae	Alchemilla	Alchemilla alpina
Rosaceae	Alchemilla	Alchemilla bulgarica
Rosaceae	Alchemilla	Alchemilla caucasica
Rosaceae	Alchemilla	Alchemilla cinerea
Rosaceae	Alchemilla	Alchemilla colorata
Rosaceae	Alchemilla	Alchemilla conjuncta
Rosaceae	Alchemilla	Alchemilla epipsila
Rosaceae	Alchemilla	Alchemilla erythropoda
Rosaceae	Alchemilla	Alchemilla firma
Rosaceae	Alchemilla	Alchemilla fissa
Rosaceae	Alchemilla	Alchemilla flabellata
Rosaceae	Alchemilla	Alchemilla glacialis
Rosaceae	Alchemilla	Alchemilla glaucescens
Rosaceae	Alchemilla	Alchemilla hoppeana
Rosaceae	Alchemilla	Alchemilla hybrida
Rosaceae	Alchemilla	Alchemilla japonica
Rosaceae	Alchemilla	Alchemilla ladislai
Rosaceae	Alchemilla	Alchemilla mollis
Rosaceae	Alchemilla	Alchemilla monticola
Rosaceae	Alchemilla	Alchemilla pentaphyllea
Rosaceae	Alchemilla	Alchemilla saxatilis
Rosaceae	Alchemilla	Alchemilla rigida
Rosaceae	Alchemilla	Alchemilla speciosa
Rosaceae	Alchemilla	Alchemilla splendens
Rosaceae	Alchemilla	Alchemilla straminea
Rosaceae	Alchemilla	Alchemilla plicatula
Rosaceae	Alchemilla	Alchemilla vulgaris
Euphorbiaceae	Alchornea	Alchornea scandens
Sapindaceae	Alectryon	Alectryon coriaceus
Sapindaceae	Alectryon	Alectryon serratum
Euphorbiaceae	Aleurites	Aleurites cordata
Euphorbiaceae	Aleurites	Aleurites moluccanus
Compositae	Alfredia	Alfredia cernua
Leguminosae	Alhagi	Alhagi pseudalhagi
Alismataceae	Alisma	Alisma canaliculatum
Alismataceae	Alisma	Alisma gramineum
Alismataceae	Alisma	Alisma lanceolatum
Alismataceae	Alisma	Alisma plantago-aquatica subsp. plantago-aquatica
Alismataceae	Alisma	Alisma plantago-aquatica
Alismataceae	Alisma	Alisma plantago-aquatica subsp. orientale
Alismataceae	Alisma	Alisma subcordatum
Boraginaceae	Alkanna	Alkanna orientalis
Boraginaceae	Alkanna	Alkanna tinctoria
Compositae	Allagopappus	Allagopappus dichotomus
Apocynaceae	Allamanda	Allamanda cathartica
Apocynaceae	Allamanda	Allamanda schottii
Athyriaceae	Diplazium	Diplazium maximum
Brassicaceae	Alliaria	Alliaria petiolata
Brassicaceae	Alliaria	Alliaria petiolata subsp. sativa
Amaryllidaceae	Allium	Allium aflatunense
Amaryllidaceae	Allium	Allium altaicum
Amaryllidaceae	Allium	Allium altissimum
Amaryllidaceae	Allium	Allium altyncolicum
Amaryllidaceae	Allium	Allium amethystinum
Amaryllidaceae	Allium	Allium ampeloprasum
Amaryllidaceae	Allium	Allium amphibolum
Amaryllidaceae	Allium	Allium amplectens
Amaryllidaceae	Allium	Allium rotundum subsp. rotundum
Amaryllidaceae	Allium	Allium angulosum
Amaryllidaceae	Allium	Allium ascalonicum
Amaryllidaceae	Allium	Allium aschersonianum
Amaryllidaceae	Allium	Allium atropurpureum
Amaryllidaceae	Allium	Allium monadelphum
Amaryllidaceae	Allium	Allium atroviolaceum
Amaryllidaceae	Allium	Allium baeticum
Amaryllidaceae	Allium	Allium barsczewskii
Amaryllidaceae	Allium	Allium ursinum subsp. ursinum
Amaryllidaceae	Allium	Allium beesianum
Amaryllidaceae	Allium	Allium bidentatum
Amaryllidaceae	Allium	Allium brevistylum
Amaryllidaceae	Allium	Allium bucharicum
Amaryllidaceae	Allium	Allium caeruleum
Amaryllidaceae	Allium	Allium caesium
Amaryllidaceae	Allium	Allium cardiostemon
Amaryllidaceae	Allium	Allium carinatum
Amaryllidaceae	Allium	Allium pulchellum
Amaryllidaceae	Allium	Allium carolinianum
Amaryllidaceae	Allium	Allium cepa
Amaryllidaceae	Allium	Allium cernuum
Amaryllidaceae	Allium	Allium chamaemoly
Amaryllidaceae	Allium	Allium chinense
Amaryllidaceae	Allium	Allium clathratum
Amaryllidaceae	Allium	Allium christophii
Amaryllidaceae	Allium	Allium curtum
Amaryllidaceae	Allium	Allium cyaneum
Amaryllidaceae	Allium	Allium cyatophorum
Amaryllidaceae	Allium	Allium cyathophorum var. farreri
Amaryllidaceae	Allium	Allium auctum
Amaryllidaceae	Allium	Allium cyrillii
Amaryllidaceae	Allium	Allium decipiens
Amaryllidaceae	Allium	Allium albidum
Amaryllidaceae	Allium	Allium derderianum
Amaryllidaceae	Allium	Allium drummondii
Amaryllidaceae	Allium	Allium dumetorum
Amaryllidaceae	Allium	Allium ericetorum
Amaryllidaceae	Allium	Allium erubescens
Amaryllidaceae	Allium	Allium fistulosum
Amaryllidaceae	Allium	Allium flavescens
Amaryllidaceae	Allium	Allium flavum
Amaryllidaceae	Allium	Allium flavum var. minus
Amaryllidaceae	Allium	Allium fuscoviolaceum
Amaryllidaceae	Allium	Allium paniculatum subsp. fuscum
Amaryllidaceae	Allium	Allium galanthum
Amaryllidaceae	Allium	Allium galilaeum
Amaryllidaceae	Allium	Allium giganteum
Amaryllidaceae	Allium	Allium glomeratum
Amaryllidaceae	Allium	Allium grande
Amaryllidaceae	Allium	Allium heldreichii
Amaryllidaceae	Allium	Allium himenorhizum
Amaryllidaceae	Allium	Allium insubricum
Amaryllidaceae	Allium	Allium karataviense
Amaryllidaceae	Allium	Allium karelinii
Amaryllidaceae	Allium	Allium kermesinum
Amaryllidaceae	Allium	Allium kokanicum
Amaryllidaceae	Allium	Allium kollmannianum
Amaryllidaceae	Allium	Allium ledebourianum
Amaryllidaceae	Allium	Allium libani
Amaryllidaceae	Allium	Allium senescens subsp. montanum
Amaryllidaceae	Allium	Allium maackii
Amaryllidaceae	Allium	Allium macleanii
Amaryllidaceae	Allium	Allium macranthum
Amaryllidaceae	Allium	Allium macrostemon
Amaryllidaceae	Allium	Allium yunnanense
Amaryllidaceae	Allium	Allium massaessylum
Amaryllidaceae	Allium	Allium moly
Amaryllidaceae	Allium	Allium montibaicalensis
Amaryllidaceae	Allium	Allium multibulbosum
Amaryllidaceae	Allium	Allium narcissiflorum
Amaryllidaceae	Allium	Allium neapolitanum
Amaryllidaceae	Allium	Allium negevense
Amaryllidaceae	Caloscordum	Caloscordum neriniiflorum
Amaryllidaceae	Allium	Allium nigrum
Amaryllidaceae	Allium	Allium nutans
Amaryllidaceae	Allium	Allium obliqum
Amaryllidaceae	Allium	Allium ochotense
Amaryllidaceae	Allium	Allium oleraceum
Amaryllidaceae	Allium	Allium oreophilum
Amaryllidaceae	Allium	Allium oreoprasum
Amaryllidaceae	Allium	Allium oschaninii
Amaryllidaceae	Allium	Allium pallens
Amaryllidaceae	Allium	Allium meronense
Amaryllidaceae	Allium	Allium paradoxum
Amaryllidaceae	Allium	Allium phanerantherum
Amaryllidaceae	Allium	Allium platyspathum
Amaryllidaceae	Allium	Allium proliferum
Amaryllidaceae	Allium	Allium przewalskianum
Amaryllidaceae	Allium	Allium adzharicum
Amaryllidaceae	Allium	Allium pskemense
Amaryllidaceae	Allium	Allium pyrenaicum
Amaryllidaceae	Allium	Allium odorum
Amaryllidaceae	Allium	Allium rosenbachianum
Amaryllidaceae	Allium	Allium roseum
Amaryllidaceae	Allium	Allium scorodoprasum subsp. rotundum
Amaryllidaceae	Allium	Allium anguistifolium
Amaryllidaceae	Allium	Allium rubellum
Amaryllidaceae	Allium	Allium komarovianum
Amaryllidaceae	Allium	Allium sarawschanicum
Amaryllidaceae	Allium	Allium sativum
Amaryllidaceae	Allium	Allium globosum
Amaryllidaceae	Allium	Allium scabriscapum
Amaryllidaceae	Allium	Allium schoenoprasum
Amaryllidaceae	Allium	Allium schuberti
Amaryllidaceae	Allium	Allium scorodoprasum
Amaryllidaceae	Allium	Allium semenovii
Amaryllidaceae	Allium	Allium senescens
Amaryllidaceae	Allium	Allium montanum
Amaryllidaceae	Nectaroscordum	Nectaroscordum siculum subsp. bulgaricum
Amaryllidaceae	Allium	Allium siculum
Amaryllidaceae	Allium	Allium sikkimense
Amaryllidaceae	Allium	Allium sphaerocephalon
Amaryllidaceae	Allium	Allium spirale
Amaryllidaceae	Allium	Allium splendens
Amaryllidaceae	Allium	Allium stellatum
Amaryllidaceae	Allium	Allium stipitatum
Amaryllidaceae	Allium	Allium strictum
Amaryllidaceae	Allium	Allium suaveolens
Amaryllidaceae	Allium	Allium subhirsutum
Amaryllidaceae	Allium	Allium subvillosum
Amaryllidaceae	Allium	Allium suworowii
Amaryllidaceae	Allium	Allium szovitsii
Amaryllidaceae	Allium	Allium tardiflorum
Amaryllidaceae	Allium	Allium telavivense
Amaryllidaceae	Allium	Allium textile
Amaryllidaceae	Allium	Allium thunbergii
Amaryllidaceae	Allium	Allium togasii
Amaryllidaceae	Allium	Allium trifoliatum
Amaryllidaceae	Allium	Allium triquetrum
Amaryllidaceae	Allium	Allium tuberosum
Amaryllidaceae	Allium	Allium turkestanicum
Amaryllidaceae	Allium	Allium unifolium
Amaryllidaceae	Allium	Allium ursinum
Amaryllidaceae	Allium	Allium basalticum
Amaryllidaceae	Allium	Allium victorialis
Amaryllidaceae	Allium	Allium vineale
Amaryllidaceae	Allium	Allium vodopjanovae
Amaryllidaceae	Allium	Allium wallichii
Amaryllidaceae	Allium	Allium zaprjagajevii
Amaryllidaceae	Allium	Allium zebdanense
Casuarinaceae	Allocasuarina	Allocasuarina verticillata
Sapindaceae	Allophylus	Allophylus cobbe
Not Found	Allosorus	Allosorus acrosticus
Styracaceae	Alniphyllum	Alniphyllum fortunei
Betulaceae	Alnus	Alnus viridis
Betulaceae	Alnus	Alnus sinuata
Betulaceae	Alnus	Alnus alnobetula
Betulaceae	Alnus	Alnus cordata
Betulaceae	Alnus	Alnus firma
Betulaceae	Alnus	Alnus glutinosa
Betulaceae	Alnus	Alnus barbata
Betulaceae	Alnus	Alnus hirsuta
Betulaceae	Alnus	Alnus incana
Betulaceae	Alnus	Alnus incana subsp. tenuifolia
Betulaceae	Alnus	Alnus incana subsp. rugosa
Betulaceae	Alnus	Alnus japonica
Betulaceae	Alnus	Alnus nepalensis
Betulaceae	Alnus	Alnus orientalis
Betulaceae	Alnus	Alnus pendula
Betulaceae	Alnus	Alnus rubra
Betulaceae	Alnus	Alnus x spaethii
Araceae	Alocasia	Alocasia macrorrhiza
Xanthorrhoeaceae	Aloe	Aloe abyssinica
Xanthorrhoeaceae	Aloe	Aloe aculeata
Xanthorrhoeaceae	Aloe	Aloe africana
Xanthorrhoeaceae	Aloe	Aloe arborescens
Xanthorrhoeaceae	Aloe	Aloe aristata
Xanthorrhoeaceae	Aloe	Aloe brivifolia
Xanthorrhoeaceae	Aloe	Aloe buettneri
Xanthorrhoeaceae	Aloe	Aloe buhrii
Xanthorrhoeaceae	Aloe	Aloe eru
Xanthorrhoeaceae	Aloe	Aloe castanea
Xanthorrhoeaceae	Aloe	Aloe chabaudii
Xanthorrhoeaceae	Aloe	Aloe ciliaris
Xanthorrhoeaceae	Aloe	Aloe citrea
Xanthorrhoeaceae	Aloe	Aloe cryptopoda
Xanthorrhoeaceae	Aloe	Aloe dawei
Xanthorrhoeaceae	Aloe	Aloe x delaetii
Xanthorrhoeaceae	Aloe	Aloe elgonica
Xanthorrhoeaceae	Aloe	Aloe ferox
Xanthorrhoeaceae	Aloe	Aloe fleurentinorum
Xanthorrhoeaceae	Aloe	Aloe glauca
Xanthorrhoeaceae	Aloe	Aloe grandidentata
Xanthorrhoeaceae	Aloe	Aloe harlana
Xanthorrhoeaceae	Aloe	Aloe hereroensis var. orpeniae
Xanthorrhoeaceae	Aloe	Aloe humilis
Xanthorrhoeaceae	Aloe	Aloe jacksonii
Xanthorrhoeaceae	Aloe	Aloe striata subsp. karasbergensis
Xanthorrhoeaceae	Aloe	Aloe kedongensis
Xanthorrhoeaceae	Aloe	Aloe khamiensis
Xanthorrhoeaceae	Aloe	Aloe kilifiensis
Xanthorrhoeaceae	Aloe	Aloe lateritia var. graminicola
Xanthorrhoeaceae	Aloe	Aloe lateritia var. lateritia
Xanthorrhoeaceae	Aloe	Aloe lutescens
Xanthorrhoeaceae	Aloe	Aloe saponaria
Xanthorrhoeaceae	Aloe	Aloe marlothii
Xanthorrhoeaceae	Aloe	Aloe megalacantha
Xanthorrhoeaceae	Aloe	Aloe microstigma
Xanthorrhoeaceae	Aloe	Aloe mudenensis
Xanthorrhoeaceae	Aloe	Aloe mitriformis
Xanthorrhoeaceae	Aloe	Aloe perryi
Xanthorrhoeaceae	Aloe	Aloe pirottae
Xanthorrhoeaceae	Aloe	Aloe plicatilis
Xanthorrhoeaceae	Aloe	Aloe pluridens
Xanthorrhoeaceae	Aloe	Aloe prostrata
Xanthorrhoeaceae	Aloe	Aloe pruinosa
Xanthorrhoeaceae	Aloe	Aloe rauhii
Xanthorrhoeaceae	Aloe	Aloe reitzii
Xanthorrhoeaceae	Aloe	Aloe scobinifolia
Xanthorrhoeaceae	Aloe	Aloe sessiliflora
Xanthorrhoeaceae	Aloe	Aloe x spinosissima
Xanthorrhoeaceae	Aloe	Aloe steudneri
Xanthorrhoeaceae	Aloe	Aloe striata
Xanthorrhoeaceae	Aloe	Aloe striatula
Xanthorrhoeaceae	Aloe	Aloe suprafoliata
Xanthorrhoeaceae	Aloe	Aloe suzannae
Xanthorrhoeaceae	Aloe	Aloe thraski
Xanthorrhoeaceae	Aloe	Aloe vanbalenii
Xanthorrhoeaceae	Aloe	Aloe variegata
Xanthorrhoeaceae	Aloe	Aloe barbadensis
Xanthorrhoeaceae	Aloe	Aloe viridiflora
Aizoaceae	Aloinopsis	Aloinopsis rubrolineata
Scrophulariaceae	Alonsoa	Alonsoa meridionalis
Poaceae	Alopecurus	Alopecurus aequalis
Poaceae	Alopecurus	Alopecurus alpinus
Poaceae	Alopecurus	Alopecurus arundinaceus
Poaceae	Alopecurus	Alopecurus bonariensis
Poaceae	Alopecurus	Alopecurus geniculatus
Poaceae	Alopecurus	Alopecurus myosuroides
Poaceae	Alopecurus	Alopecurus pratensis
Poaceae	Alopecurus	Alopecurus rendlei
Verbenaceae	Aloysia	Aloysia citrodora
Zingiberaceae	Alpinia	Alpinia calcarata
Zingiberaceae	Alpinia	Alpinia formosana
Zingiberaceae	Alpinia	Alpinia galanga
Zingiberaceae	Alpinia	Alpinia japonica
Zingiberaceae	Alpinia	Alpinia officinarum
Zingiberaceae	Alpinia	Alpinia purpurata
Zingiberaceae	Alpinia	Alpinia zerumbet
Apocynaceae	Alstonia	Alstonia angustifolia
Apocynaceae	Alstonia	Alstonia constricta
Alstroemeriaceae	Alstroemeria	Alstroemeria aurea
Alstroemeriaceae	Alstroemeria	Alstroemeria pulchra
Crassulaceae	Altamiranoa	Altamiranoa batesii
Amaranthaceae	Alternanthera	Alternanthera purpurea
Malvaceae	Althaea	Althaea armeniaca
Malvaceae	Althaea	Althaea cannabina
Malvaceae	Althaea	Althaea hirsuta
Malvaceae	Althaea	Althaea officinalis
Malvaceae	Althaea	Althaea rosea var. nigra
Malvaceae	Althaea	Althaea officinalis subsp. taurinensis
Malvaceae	Alyogyne	Alyogyne hakeifolia
Malvaceae	Alyogyne	Alyogyne huegelii
Leguminosae	Alysicarpus	Alysicarpus vaginalis
Brassicaceae	Alyssoides	Alyssoides utriculata
Brassicaceae	Alyssoides	Alyssoides utriculata subsp. utriculata
Brassicaceae	Vesicaria	Vesicaria graeca
Brassicaceae	Alyssum	Alyssum alpestre
Brassicaceae	Alyssum	Alyssum alyssoides
Brassicaceae	Alyssum	Alyssum argenteum
Brassicaceae	Alyssum	Alyssum bertolonii
Brassicaceae	Alyssum	Alyssum bornmuelleri
Brassicaceae	Alyssum	Alyssum cuneifolium
Brassicaceae	Alyssum	Alyssum diffusum
Brassicaceae	Alyssum	Alyssum gymnopodum
Brassicaceae	Alyssum	Alyssum lenense
Brassicaceae	Alyssum	Alyssum markgrafii
Brassicaceae	Alyssum	Alyssum moellendorfianum
Brassicaceae	Alyssum	Alyssum montanum
Brassicaceae	Alyssum	Alyssum atlanticum
Brassicaceae	Alyssum	Alyssum murale
Brassicaceae	Alyssum	Alyssum obovatum
Brassicaceae	Alyssum	Alyssum ovirense
Brassicaceae	Alyssum	Alyssum propinquum
Brassicaceae	Alyssum	Alyssum repens
Brassicaceae	Alyssum	Alyssum simplex
Brassicaceae	Alyssum	Alyssum stribrnyi
Brassicaceae	Alyssum	Alyssum repens subsp. trichostachyum
Brassicaceae	Alyssum	Alyssum wulfenianum
Apocynaceae	Alyxia	Alyxia buxifolia
Apocynaceae	Alyxia	Alyxia composita
Apocynaceae	Alyxia	Alyxia daphnoides
Apocynaceae	Alyxia	Alyxia ruscifolia
Rubiaceae	Amaracarpus	Amaracarpus pubescens
Amaranthaceae	Amaranthus	Amaranthus albus
Amaranthaceae	Amaranthus	Amaranthus atropurpureus
Amaranthaceae	Amaranthus	Amaranthus aureus
Amaranthaceae	Amaranthus	Amaranthus blitoides
Amaranthaceae	Amaranthus	Amaranthus blitum
Amaranthaceae	Amaranthus	Amaranthus lividus
Amaranthaceae	Amaranthus	Amaranthus caudatus
Amaranthaceae	Amaranthus	Amaranthus oleraceus var. oleraceus
Amaranthaceae	Amaranthus	Amaranthus caudatus var. pendulinus
Amaranthaceae	Amaranthus	Amaranthus caudatus var. rubra
Amaranthaceae	Amaranthus	Amaranthus caudatus var. sanguineus
Amaranthaceae	Amaranthus	Amaranthus caudatus var. viridis
Amaranthaceae	Amaranthus	Amaranthus crispus
Amaranthaceae	Amaranthus	Amaranthus cruentus
Amaranthaceae	Amaranthus	Amaranthus deflexus
Amaranthaceae	Amaranthus	Amaranthus caudatus subsp. caudatus
Amaranthaceae	Amaranthus	Amaranthus graecizans subsp. sylvestris
Amaranthaceae	Amaranthus	Amaranthus graecizans
Amaranthaceae	Amaranthus	Amaranthus hybridus
Amaranthaceae	Amaranthus	Amaranthus flavus
Amaranthaceae	Amaranthus	Amaranthus erythrostachys
Amaranthaceae	Amaranthus	Amaranthus powellii
Amaranthaceae	Amaranthus	Amaranthus bouchonii
Amaranthaceae	Amaranthus	Amaranthus retroflexus
Amaranthaceae	Amaranthus	Amaranthus spinosus
Amaranthaceae	Amaranthus	Amaranthus tricolor
Amaryllidaceae	Amaryllis	Amaryllis bella-donna
Boraginaceae	Amblynotus	Amblynotus rupestris
Compositae	Ambrosia	Ambrosia artemisiifolia
Compositae	Ambrosia	Ambrosia chamissonis
Compositae	Ambrosia	Ambrosia mexicana
Compositae	Ambrosia	Ambrosia trifida
Rosaceae	Amelanchier	Amelanchier alnifolia
Rosaceae	Amelanchier	Amelanchier canadensis
Rosaceae	Amelanchier	Amelanchier laevis
Rosaceae	Amelanchier	Amelanchier lamarckii
Rosaceae	Amelanchier	Amelanchier ovalis
Rosaceae	Amelanchier	Amelanchier ovalis subsp. cretica
Rosaceae	Amelanchier	Amelanchier alnifolia subsp. pumila
Rosaceae	Amelanchier	Amelanchier sanguinea
Rosaceae	Amelanchier	Amelanchier spicata
Rosaceae	Amelanchier	Amelanchier utahensis
Lamiaceae	Amethystea	Amethystea caerulea
Leguminosae	Amherstia	Amherstia nobilis
Melanthiaceae	Zigadenus	Zigadenus muscitoxicum
Lythraceae	Ammannia	Ammannia coccinea
Apiaceae	Ammi	Ammi majus
Apiaceae	Ammi	Ammi visnaga
Compositae	Ammobium	Ammobium alatum
Poaceae	Ammophila	Ammophila arenaria
Zingiberaceae	Amomum	Amomum compactum
Myrtaceae	Amomyrtus	Amomyrtus luma
Leguminosae	Amorpha	Amorpha californica
Leguminosae	Amorpha	Amorpha canescens
Leguminosae	Amorpha	Amorpha croceolanata
Leguminosae	Amorpha	Amorpha fruticosa
Leguminosae	Amorpha	Amorpha glabra
Leguminosae	Amorpha	Amorpha nana
Leguminosae	Amorpha	Amorpha paniculata
Araceae	Amorphophallus	Amorphophallus albus
Araceae	Amorphophallus	Amorphophallus bulbifer
Araceae	Amorphophallus	Amorphophallus konjac
Araceae	Amorphophallus	Amorphophallus krausei
Araceae	Amorphophallus	Amorphophallus mulleri
Araceae	Amorphophallus	Amorphophallus myosuroides
Araceae	Amorphophallus	Amorphophallus paeoniifolius
Araceae	Amorphophallus	Amorphophallus thaiensis
Araceae	Amorphophallus	Amorphophallus titanum
Vitaceae	Ampelopsis	Ampelopsis americana
Poaceae	Ampelodesmos	Ampelodesmos mauritanica
Vitaceae	Ampelopsis	Ampelopsis aconitifolia
Vitaceae	Ampelopsis	Ampelopsis brevipedunculata var. brevipedunculata
Vitaceae	Ampelopsis	Ampelopsis cordata
Vitaceae	Ampelopsis	Ampelopsis delavayana
Vitaceae	Ampelopsis	Ampelopsis aconitifolia var. glabra
Vitaceae	Ampelopsis	Ampelopsis glandulosa var. brevipedunculata
Vitaceae	Ampelopsis	Ampelopsis glandulosa var. heterophylla
Vitaceae	Ampelopsis	Ampelopsis japonica
Vitaceae	Ampelopsis	Ampelopsis megalophylla
Leguminosae	Amphicarpaea	Amphicarpaea bracteata
Bignoniaceae	Pithecoctenium	Pithecoctenium cynanchoides
Thelypteridaceae	Amphineuron	Amphineuron immersum
Bignoniaceae	Amphitecna	Amphitecna latifolia
Boraginaceae	Amsinckia	Amsinckia calycina
Apocynaceae	Amsonia	Amsonia ciliata
Apocynaceae	Amsonia	Amsonia texana
Apocynaceae	Amsonia	Amsonia hubrichtii
Apocynaceae	Amsonia	Amsonia illustris
Apocynaceae	Amsonia	Amsonia orientalis
Apocynaceae	Amsonia	Amsonia rigida
Apocynaceae	Amsonia	Amsonia tabernaemontana
Apocynaceae	Amsonia	Amsonia tabernaemontana var. salicifolia
Anacampserotaceae	Grahamia	Grahamia coahuilensis
Anacampserotaceae	Anacampseros	Anacampseros comptonii
Anacampserotaceae	Anacampseros	Anacampseros filamentosa
Anacampserotaceae	Avonia	Avonia herreana
Anacampserotaceae	Anacampseros	Anacampseros lanceolata
Anacampserotaceae	Anacampseros	Anacampseros namaquensis
Anacampserotaceae	Anacampseros	Anacampseros rufescens
Anacampserotaceae	Anacampseros	Anacampseros telephiastrum
Anacampserotaceae	Anacampseros	Anacampseros tomentosa
Orchidaceae	Orchis	Orchis coriophora
Anacardiaceae	Anacardium	Anacardium occidentale
Compositae	Anacyclus	Anacyclus clavatus
Compositae	Anacyclus	Anacyclus nigellifolius
Compositae	Anacyclus	Anacyclus pyrethrum
Compositae	Anacyclus	Anacyclus radiatus
Leguminosae	Anadenanthera	Anadenanthera peregrina
Primulaceae	Anagallis	Anagallis arvensis
Primulaceae	Anagallis	Anagallis foemina
Primulaceae	Anagallis	Anagallis arvensis subsp. foeminea
Primulaceae	Centunculus	Centunculus minimus
Primulaceae	Anagallis	Anagallis monelli
Leguminosae	Anagyris	Anagyris foetida
Leguminosae	Anagyris	Anagyris latifolia
Menispermaceae	Anamirta	Anamirta cocculus
Bromeliaceae	Ananas	Ananas bracteatus
Bromeliaceae	Ananas	Ananas comosus
Compositae	Anaphalis	Anaphalis alpicola
Compositae	Anaphalis	Anaphalis flaccida
Compositae	Anaphalis	Anaphalis lactea
Compositae	Anaphalis	Anaphalis margaritacea
Compositae	Anaphalis	Anaphalis sinica
Compositae	Anaphalis	Anaphalis triplinervis
Plantaginaceae	Anarrhinum	Anarrhinum bellidifolium
Plantaginaceae	Anarrhinum	Anarrhinum corsicum
Plantaginaceae	Anarrhinum	Anarrhinum forskahlii
Brassicaceae	Anastatica	Anastatica hierochuntica
Annonaceae	Anaxagorea	Anaxagorea javanica
Araceae	Anchomanes	Anchomanes difformis
Araceae	Anchomanes	Anchomanes giganteus
Boraginaceae	Anchusa	Anchusa arvensis subsp. arvensis
Boraginaceae	Anchusa	Anchusa arvensis
Boraginaceae	Anchusa	Anchusa azurea
Boraginaceae	Anchusa	Anchusa capensis
Boraginaceae	Anchusa	Anchusa ochloreuca
Boraginaceae	Anchusa	Anchusa officinalis
Cactaceae	Ancistrocactus	Ancistrocactus scheere
Leguminosae	Andira	Andira inermis
Colchicaceae	Androcymbium	Androcymbium gramineum
Acanthaceae	Andrographis	Andrographis paniculata
Ericaceae	Andromeda	Andromeda polifolia
Poaceae	Andropogon	Andropogon gerardii
Poaceae	Andropogon	Andropogon virginicus
Primulaceae	Androsace	Androsace adfinis subsp. brigatinica
Primulaceae	Androsace	Androsace adfinis subsp. brigantiaca
Primulaceae	Androsace	Androsace puberula
Primulaceae	Androsace	Androsace albana
Primulaceae	Androsace	Androsace alpina
Primulaceae	Androsace	Androsace amurensis
Primulaceae	Androsace	Androsace carnea subsp. brigantiaca
Primulaceae	Androsace	Androsace chaixii
Primulaceae	Androsace	Androsace chamaejasme
Primulaceae	Androsace	Androsace elongata
Primulaceae	Androsace	Androsace filiformis
Primulaceae	Androsace	Androsace halleri
Primulaceae	Androsace	Androsace lactea
Primulaceae	Androsace	Androsace laevigata
Primulaceae	Androsace	Androsace carnea subsp. laggeri
Primulaceae	Androsace	Androsace lanuginosa
Primulaceae	Androsace	Androsace chamaejasme subsp. lehmanniana
Primulaceae	Androsace	Androsace limprichtii
Primulaceae	Androsace	Androsace mathildae
Primulaceae	Androsace	Androsace maxima
Primulaceae	Douglasia	Douglasia montana
Primulaceae	Androsace	Androsace mucronifolia
Primulaceae	Douglasia	Douglasia nivalis
Primulaceae	Androsace	Androsace obtusifolia
Primulaceae	Androsace	Androsace pyrenaica
Primulaceae	Androsace	Androsace sarmentosa
Primulaceae	Androsace	Androsace sempervivoides
Primulaceae	Androsace	Androsace septentrionalis
Primulaceae	Androsace	Androsace strigillosa
Primulaceae	Androsace	Androsace villosa
Primulaceae	Androsace	Androsace villosa subsp. villosa
Primulaceae	Androsace	Androsace wulfeniana
Compositae	Andryala	Andryala agardhii
Asparagaceae	Anemarrhena	Anemarrhena asphodeloides
Anemiaceae	Anemia	Anemia dregeana
Anemiaceae	Anemia	Anemia flexuosa
Anemiaceae	Anemia	Anemia mandioccana
Anemiaceae	Anemia	Anemia mexicana
Anemiaceae	Anemia	Anemia phyllitidis
Anemiaceae	Anemia	Anemia rotundifolia
Anemiaceae	Anemia	Anemia tomentosa
Anemiaceae	Anemia	Anemia underwoodiana
Ranunculaceae	Pulsatilla	Pulsatilla alpina
Ranunculaceae	Pulsatilla	Pulsatilla alpina subsp. apiifolia
Ranunculaceae	Anemone	Anemone altaica
Ranunculaceae	Anemone	Anemone apennina
Ranunculaceae	Anemone	Anemone multifida f. lutea
Ranunculaceae	Anemone	Anemone baicalensis
Ranunculaceae	Anemone	Anemone baldensis
Ranunculaceae	Anemone	Anemone canadensis
Ranunculaceae	Anemone	Anemone caroliniana
Ranunculaceae	Pulsatilla	Pulsatilla chinensis
Ranunculaceae	Anemone	Anemone coronaria
Ranunculaceae	Anemone	Anemone crinita
Ranunculaceae	Anemone	Anemone cylindrica
Ranunculaceae	Anemone	Anemone decapetala
Ranunculaceae	Anemone	Anemone demissa
Ranunculaceae	Anemone	Anemone dichotoma
Ranunculaceae	Anemone	Anemone drummondii
Ranunculaceae	Pulsatilla	Pulsatilla flavescens
Ranunculaceae	Anemone	Anemone halleri subsp. styriaca
Ranunculaceae	Pulsatilla	Pulsatilla halleri
Ranunculaceae	Anemone	Anemone hortensis
Ranunculaceae	Anemone	Anemone hupehensis
Ranunculaceae	Knowltonia	Knowltonia capensis
Ranunculaceae	Anemone	Anemone x lesseri
Ranunculaceae	Anemone	Anemone mexicana
Ranunculaceae	Pulsatilla	Pulsatilla montana
Ranunculaceae	Anemone	Anemone multifida
Ranunculaceae	Anemone	Anemone multifida f. rubriflora
Ranunculaceae	Anemone	Anemone apennina subsp. apennina
Ranunculaceae	Anemone	Anemone multifida var. hudsoniana
Ranunculaceae	Anemone	Anemone narcissiflora var. crinita
Ranunculaceae	Anemone	Anemone trullifolia subsp. linearifolia
Ranunculaceae	Anemone	Anemone narcissiflora
Ranunculaceae	Anemone	Anemone narcissiflora subsp. interior
Ranunculaceae	Anemone	Anemone fasciculata
Ranunculaceae	Anemone	Anemone narcissiflora var. uralensis
Ranunculaceae	Anemone	Anemone narcissiflora subsp. narcissiflora
Ranunculaceae	Anemone	Anemone nemorosa
Ranunculaceae	Anemone	Anemone obtusiloba
Ranunculaceae	Pulsatilla	Pulsatilla occidentalis
Ranunculaceae	Anemone	Anemone palmata
Ranunculaceae	Anemone	Anemone parviflora
Ranunculaceae	Pulsatilla	Pulsatilla patens
Ranunculaceae	Pulsatilla	Pulsatilla multifida
Ranunculaceae	Anemone	Anemone pavoniana
Ranunculaceae	Pulsatilla	Pulsatilla pratensis
Ranunculaceae	Pulsatilla	Pulsatilla vulgaris subsp. gotlandica
Ranunculaceae	Anemonoides	Anemonoides ranunculoides
Ranunculaceae	Anemone	Anemone reflexa
Ranunculaceae	Pulsatilla	Pulsatilla latifolia
Ranunculaceae	Anemone	Anemone rivularis
Ranunculaceae	Anemone	Anemone barbulata
Ranunculaceae	Anemone	Anemone rupicola
Ranunculaceae	Anemone	Anemone hupehensis var. japonica
Ranunculaceae	Pulsatilla	Pulsatilla alpina subsp. alba
Ranunculaceae	Pulsatilla	Pulsatilla halleri subsp. slavica
Ranunculaceae	Pulsatilla	Pulsatilla styriaca
Ranunculaceae	Anemone	Anemone sylvestris
Ranunculaceae	Anemone	Anemone tetrasepala
Ranunculaceae	Anemone	Anemone tomentosa
Ranunculaceae	Hepatica	Hepatica transsilvanica
Ranunculaceae	Anemone	Anemone trifolia
Ranunculaceae	Anemone	Anemone narcissifolia
Ranunculaceae	Pulsatilla	Pulsatilla vernalis
Ranunculaceae	Knowltonia	Knowltonia vesicatoria
Ranunculaceae	Anemone	Anemone virginiana
Ranunculaceae	Anemone	Anemone riparia
Ranunculaceae	Anemone	Anemone vitifolia
Ranunculaceae	Anemonella	Anemonella thalictroides
Ranunculaceae	Anemonidium	Anemonidium dichotomum
Ranunculaceae	Anemonopsis	Anemonopsis macrophylla
Apiaceae	Anethum	Anethum graveolens
Apiaceae	Angelica	Angelica amurensis
Apiaceae	Angelica	Angelica anomala
Apiaceae	Angelica	Angelica archangelica
Apiaceae	Angelica	Angelica archangelica subsp. archangelica
Apiaceae	Angelica	Angelica archangelica subsp. litoralis
Apiaceae	Angelica	Angelica arguta
Apiaceae	Angelica	Angelica atropurpurea
Apiaceae	Angelica	Angelica dahurica
Apiaceae	Angelica	Angelica gigas
Apiaceae	Angelica	Angelica glauca
Apiaceae	Angelica	Angelica pachycarpa
Apiaceae	Angelica	Angelica palustris
Apiaceae	Angelica	Angelica polymorpha
Apiaceae	Angelica	Angelica razulii
Apiaceae	Angelica	Angelica sylvestris
Apiaceae	Angelica	Angelica sylvestris subsp. bernardae
Apiaceae	Angelica	Angelica sylvestris subsp. sylvestris
Apiaceae	Angelica	Angelica ursina
Apiaceae	Angelica	Angelica venenosa
Marattiaceae	Angiopteris	Angiopteris evecta
Athyriaceae	Athyrium	Athyrium niponicum
Malvaceae	Anisodontea	Anisodontea capensis
Malvaceae	Anisodontea	Anisodontea hypomandarum
Solanaceae	Scopolia	Scopolia anomala
Annonaceae	Annona	Annona cherimola
Annonaceae	Annona	Annona glabra
Annonaceae	Annona	Annona montana
Annonaceae	Annona	Annona muricata
Annonaceae	Annona	Annona lutescens
Annonaceae	Annona	Annona senegalensis
Annonaceae	Annona	Annona squamosa
Malvaceae	Anoda	Anoda cristata
Apocynaceae	Anodendron	Anodendron paniculatum
Combretaceae	Anogeissus	Anogeissus leiocarpa
Pteridaceae	Anogramma	Anogramma leptophylla
Annonaceae	Anomianthus	Anomianthus dulcis
Basellaceae	Boussingaultia	Boussingaultia baselloides
Basellaceae	Anredera	Anredera cordifolia
Compositae	Antennaria	Antennaria alpina
Compositae	Antennaria	Antennaria aromatica
Compositae	Antennaria	Antennaria carpatica
Compositae	Antennaria	Antennaria chilensis
Compositae	Antennaria	Antennaria dioica
Compositae	Antennaria	Antennaria dioica var. borealis
Compositae	Antennaria	Antennaria howelii
Compositae	Antennaria	Antennaria petaloidea
Compositae	Antennaria	Antennaria canadensis
Compositae	Antennaria	Antennaria neglecta var. attenuata
Compositae	Antennaria	Antennaria lanata
Compositae	Leontopodium	Leontopodium linearifolium
Compositae	Antennaria	Antennaria microphylla
Compositae	Antennaria	Antennaria neglecta
Compositae	Antennaria	Antennaria parviflora
Compositae	Antennaria	Antennaria aprica
Compositae	Antennaria	Antennaria plantaginea
Compositae	Antennaria	Antennaria plantaginifolia
Compositae	Antennaria	Antennaria pulcherrima
Compositae	Antennaria	Antennaria rosea subsp. confinis
Compositae	Antennaria	Antennaria rosea
Compositae	Antennaria	Antennaria rosea subsp. pulvinata
Compositae	Antennaria	Antennaria umbrinella
Polygonaceae	Polygonum	Polygonum filiforme
Polygonaceae	Persicaria	Persicaria filiformis
Compositae	Anthemis	Anthemis arvensis
Compositae	Anthemis	Anthemis cotula
Compositae	Anthemis	Anthemis cretica subsp. cretica
Compositae	Anthemis	Anthemis cretica subsp. petraea
Compositae	Anthemis	Anthemis maris-mortui
Compositae	Anthemis	Anthemis maritima subsp. maritima
Compositae	Anthemis	Anthemis biebersteiniana
Compositae	Anthemis	Anthemis rudolphiana
Compositae	Anthemis	Anthemis ruthenica
Compositae	Anthemis	Anthemis tinctoria var. sancti-johannis
Asparagaceae	Anthericum	Anthericum liliago subsp. algeriense
Asparagaceae	Anthericum	Anthericum liliago
Asparagaceae	Anthericum	Anthericum ramosum
Poaceae	Anthoxanthum	Anthoxanthum aristatum
Poaceae	Anthoxanthum	Anthoxanthum odoratum subsp. lapponicum
Poaceae	Anthoxanthum	Anthoxanthum odoratum
Poaceae	Anthoxanthum	Anthoxanthum ovatum
Apiaceae	Anthriscus	Anthriscus caucalis
Apiaceae	Anthriscus	Anthriscus cerefolium
Apiaceae	Anthriscus	Anthriscus cerefolium subsp. cerefolium
Apiaceae	Anthriscus	Anthriscus sylvestris subsp. stenophylla
Apiaceae	Anthriscus	Anthriscus nitida
Apiaceae	Anthriscus	Anthriscus cerefolium subsp. trichospermus
Apiaceae	Anthriscus	Anthriscus quadrillage
Apiaceae	Anthriscus	Anthriscus ruisseau
Apiaceae	Anthriscus	Anthriscus sylvestris
Araceae	Anthurium	Anthurium andraeanum
Araceae	Anthurium	Anthurium bakeri
Araceae	Anthurium	Anthurium cordatum
Araceae	Anthurium	Anthurium gracile
Araceae	Anthurium	Anthurium harrisii
Araceae	Anthurium	Anthurium hookeri
Araceae	Anthurium	Anthurium leuconeurum
Araceae	Anthurium	Anthurium lucens
Araceae	Anthurium	Anthurium magnificum
Araceae	Anthurium	Anthurium muyunense
Araceae	Anthurium	Anthurium olfersianum
Araceae	Anthurium	Anthurium x roseum
Araceae	Anthurium	Anthurium scandens
Araceae	Anthurium	Anthurium scherzerianum
Araceae	Anthurium	Anthurium schlechtendalii
Araceae	Anthurium	Anthurium verapazense
Araceae	Anthurium	Anthurium vittariifolium
Araceae	Anthurium	Anthurium wendlingeri
Araceae	Anthurium	Anthurium willdenowii
Leguminosae	Anthyllis	Anthyllis alpestris
Leguminosae	Anthyllis	Anthyllis barba-jovis
Leguminosae	Anthyllis	Anthyllis vulneraria var. coccinea
Leguminosae	Anthyllis	Anthyllis cytisoides
Leguminosae	Anthyllis	Anthyllis hermanniae
Leguminosae	Anthyllis	Anthyllis montana subsp. jaquinii
Leguminosae	Anthyllis	Anthyllis montana
Leguminosae	Anthyllis	Anthyllis montana subsp. atropurpurea
Leguminosae	Anthyllis	Anthyllis terniflora
Leguminosae	Anthyllis	Anthyllis vulneraria
Leguminosae	Anthyllis	Anthyllis vulneraria subsp. alpestris
Leguminosae	Anthyllis	Anthyllis vulneraria subsp. praepropera
Leguminosae	Anthyllis	Anthyllis vulneraria subsp. baldensis
Leguminosae	Anthyllis	Anthyllis vulneraria subsp. praepopera
Leguminosae	Anthyllis	Anthyllis vulneraria subsp. arundana
Leguminosae	Anthyllis	Anthyllis vulneraria subsp. maura
Leguminosae	Anthyllis	Anthyllis vulneraria subsp. lapponica
Moraceae	Antiaris	Antiaris toxicaria
Melanthiaceae	Zigadenus	Zigadenus elegans
Phyllanthaceae	Antidesma	Antidesma bunius
Phyllanthaceae	Antidesma	Antidesma pentadrum
Polygonaceae	Antigonon	Antigonon leptopus
Plantaginaceae	Antirrhinum	Antirrhinum australe
Plantaginaceae	Antirrhinum	Antirrhinum barrelieri
Plantaginaceae	Antirrhinum	Antirrhinum braun-blanquetii
Plantaginaceae	Antirrhinum	Antirrhinum charidemii
Plantaginaceae	Antirrhinum	Antirrhinum hispanicum
Plantaginaceae	Antirrhinum	Antirrhinum latifolium
Plantaginaceae	Antirrhinum	Antirrhinum majus
Plantaginaceae	Antirrhinum	Antirrhinum majus subsp. majus
Plantaginaceae	Antirrhinum	Antirrhinum majus subsp. tortuosum
Plantaginaceae	Antirrhinum	Antirrhinum majus subsp. linkianum
Plantaginaceae	Antirrhinum	Antirrhinum majus subsp. nanum
Plantaginaceae	Antirrhinum	Antirrhinum molle
Plantaginaceae	Antirrhinum	Antirrhinum pulverulentum
Plantaginaceae	Antirrhinum	Antirrhinum siculum
Apocynaceae	Vincetoxicum	Vincetoxicum medium
Compositae	Anvillea	Anvillea gracinii
Caryophyllaceae	Anychia	Anychia dichotoma
Loasaceae	Aosa	Aosa rupestris
Poaceae	Apera	Apera interrupta
Poaceae	Apera	Apera spica-venti
Meliaceae	Aphanamixis	Aphanamixis polystachya
Rosaceae	Aphanes	Aphanes arvensis
Rosaceae	Aphanes	Aphanes inexspectata
Acanthaceae	Aphelandra	Aphelandra aurantiaca
Acanthaceae	Aphelandra	Aphelandra liboniana
Asparagaceae	Aphyllanthes	Aphyllanthes monspeliensis
Apiaceae	Apium	Apium australe
Apiaceae	Apium	Apium graveolens var. graveolens
Apiaceae	Apium	Apium graveolens var. secalinum
Apiaceae	Apium	Apium graveolens
Apiaceae	Apium	Apium graveolens subsp. graveolens
Apiaceae	Helosciadium	Helosciadium nodiflorum
Apocynaceae	Apocynum	Apocynum cannabinum
Phyllanthaceae	Aporosa	Aporosa globifera
Compositae	Aposeris	Aposeris foetida
Thymelaeaceae	Aquilaria	Aquilaria filaria
Ranunculaceae	Aquilegia	Aquilegia alpina
Ranunculaceae	Aquilegia	Aquilegia atrata
Ranunculaceae	Aquilegia	Aquilegia atrovinosa
Ranunculaceae	Aquilegia	Aquilegia flabellata f. alba
Ranunculaceae	Aquilegia	Aquilegia aurea
Ranunculaceae	Aquilegia	Aquilegia baikalensis
Ranunculaceae	Aquilegia	Aquilegia baluchistanica
Ranunculaceae	Aquilegia	Aquilegia barnebyi
Ranunculaceae	Aquilegia	Aquilegia bernardii
Ranunculaceae	Aquilegia	Aquilegia bertolonii
Ranunculaceae	Aquilegia	Aquilegia buergeriana
Ranunculaceae	Aquilegia	Aquilegia coerulea
Ranunculaceae	Aquilegia	Aquilegia canadensis
Ranunculaceae	Aquilegia	Aquilegia chrysantha
Ranunculaceae	Aquilegia	Aquilegia chaplinei
Ranunculaceae	Aquilegia	Aquilegia vulgaris f. alba
Ranunculaceae	Aquilegia	Aquilegia flabellata f. albiflora
Ranunculaceae	Aquilegia	Aquilegia desertorum
Ranunculaceae	Aquilegia	Aquilegia dichroa
Ranunculaceae	Semiaquilegia	Semiaquilegia ecalcarata
Ranunculaceae	Aquilegia	Aquilegia einseleana
Ranunculaceae	Aquilegia	Aquilegia flabellata var. pumila
Ranunculaceae	Aquilegia	Aquilegia chrysantha var. chrysantha
Ranunculaceae	Aquilegia	Aquilegia pyrenaica subsp. pyrenaica
Ranunculaceae	Aquilegia	Aquilegia flavescens
Ranunculaceae	Aquilegia	Aquilegia californica
Ranunculaceae	Aquilegia	Aquilegia fragrans
Ranunculaceae	Aquilegia	Aquilegia glandulosa
Ranunculaceae	Aquilegia	Aquilegia grata
Ranunculaceae	Aquilegia	Aquilegia jonesii
Ranunculaceae	Aquilegia	Aquilegia laramiensis
Ranunculaceae	Aquilegia	Aquilegia longissima
Ranunculaceae	Aquilegia	Aquilegia magellensis
Ranunculaceae	Aquilegia	Aquilegia nevadensis
Ranunculaceae	Aquilegia	Aquilegia nigricans
Ranunculaceae	Aquilegia	Aquilegia olympica
Ranunculaceae	Aquilegia	Aquilegia ottonis subsp. amaliae
Ranunculaceae	Aquilegia	Aquilegia oxysepala
Ranunculaceae	Aquilegia	Aquilegia parviflora
Ranunculaceae	Aquilegia	Aquilegia pyrenaica
Ranunculaceae	Aquilegia	Aquilegia cazorlensis
Ranunculaceae	Aquilegia	Aquilegia aurantiaca
Ranunculaceae	Aquilegia	Aquilegia pyrenaica subsp. discolor
Ranunculaceae	Aquilegia	Aquilegia rockii
Ranunculaceae	Aquilegia	Aquilegia saximontana
Ranunculaceae	Aquilegia	Aquilegia scopulorum
Ranunculaceae	Aquilegia	Aquilegia sibirica
Ranunculaceae	Aquilegia	Aquilegia skinneri
Ranunculaceae	Aquilegia	Aquilegia thalictrifolia
Ranunculaceae	Aquilegia	Aquilegia vulgaris var. transsylvanica
Ranunculaceae	Aquilegia	Aquilegia autropurpurea
Ranunculaceae	Aquilegia	Aquilegia hybrida
Ranunculaceae	Aquilegia	Aquilegia viscosa
Ranunculaceae	Aquilegia	Aquilegia vulgaris
Ranunculaceae	Aquilegia	Aquilegia x cultorum
Ranunculaceae	Aquilegia	Aquilegia yabeana
Brassicaceae	Cardaminopsis	Cardaminopsis arenosa
Brassicaceae	Cardaminopsis	Cardaminopsis halleri
Brassicaceae	Arabidopsis	Arabidopsis thaliana
Brassicaceae	Arabis	Arabis allionii
Brassicaceae	Arabis	Arabis cenisia
Brassicaceae	Arabis	Arabis alpina
Brassicaceae	Arabis	Arabis amplexicaulis
Brassicaceae	Arabis	Arabis androsacea
Brassicaceae	Arabis	Arabis aubrietioides
Brassicaceae	Arabis	Arabis bellidifolia subsp. bellidifolia
Brassicaceae	Arabis	Arabis blepharophylla
Brassicaceae	Arabis	Arabis bryoides
Brassicaceae	Arabis	Arabis caerulea
Brassicaceae	Arabis	Arabis caucasica
Brassicaceae	Arabis	Arabis ciliata
Brassicaceae	Arabis	Arabis drabiformis
Brassicaceae	Arabis	Arabis ferdinandi-coburgii
Brassicaceae	Arabis	Arabis flaviflora
Brassicaceae	Arabis	Arabis hirsuta
Brassicaceae	Arabis	Arabis nordmanniana
Brassicaceae	Arabis	Arabis auriculata
Brassicaceae	Arabis	Arabis nemorensis
Brassicaceae	Arabis	Arabis fernandi-cobourgi
Brassicaceae	Arabis	Arabis procurrens
Brassicaceae	Arabis	Arabis vochinensis
Brassicaceae	Arabis	Arabis belidifolia
Brassicaceae	Arabis	Arabis sagittata
Brassicaceae	Arabis	Arabis soyeri subsp. subcoriacea
Brassicaceae	Arabis	Arabis soyeri
Brassicaceae	Arabis	Arabis soyeri subsp. jaquinii
Brassicaceae	Arabis	Arabis x suendermannii
Brassicaceae	Arabis	Arabis turrita
Leguminosae	Arachis	Arachis hypogaea
Dryopteridaceae	Arachniodes	Arachniodes aristata
Dryopteridaceae	Arachniodes	Arachniodes simplicior
Bromeliaceae	Araeococcus	Araeococcus flagellifolius
Araliaceae	Aralia	Aralia californica
Araliaceae	Aralia	Aralia chinensis
Araliaceae	Aralia	Aralia continentalis
Araliaceae	Aralia	Aralia cordata
Araliaceae	Aralia	Aralia cordata var. sachalinensis
Araliaceae	Aralia	Aralia elata
Araliaceae	Aralia	Aralia elata var. mandshurica
Araliaceae	Aralia	Aralia racemosa
Araliaceae	Aralia	Aralia spinosa
Araliaceae	Aralia	Aralia ternate
Araucariaceae	Araucaria	Araucaria angustifolia
Araucariaceae	Araucaria	Araucaria araucana
Araucariaceae	Araucaria	Araucaria bidwillii
Araucariaceae	Araucaria	Araucaria columnaris
Araucariaceae	Araucaria	Araucaria cunninghamii
Araucariaceae	Araucaria	Araucaria heterophylla
Apocynaceae	Araujia	Araujia sericifera
Ericaceae	Arbutus	Arbutus andrachne
Ericaceae	Arbutus	Arbutus unedo
Menispermaceae	Arcangelisia	Arcangelisia flava
Leguminosae	Archidendron	Archidendron fagifolium
Arecaceae	Archontophoenix	Archontophoenix alexandrae
Arecaceae	Archontophoenix	Archontophoenix cunninghamiana
Compositae	Arctium	Arctium lappa
Compositae	Arctium	Arctium lappa var. edule
Compositae	Arctium	Arctium minus
Compositae	Arctium	Arctium nemorosum
Compositae	Arctium	Arctium tomentosum
Ericaceae	Arctostaphylos	Arctostaphylos ephemeral
Ericaceae	Arctostaphylos	Arctostaphylos uva-ursi
Compositae	Arctotheca	Arctotheca calendula
Compositae	Arctotis	Arctotis acaulis
Compositae	Arctotis	Arctotis fastuosa
Compositae	Venidium	Venidium hirsutum
Compositae	Arctotis	Arctotis x hybrida
Compositae	Arctotis	Arctotis stoechadifolia
Compositae	Arctotis	Arctotis venusta
Ericaceae	Arctostaphylos	Arctostaphylos alpina
Ericaceae	Arctostaphylos	Arctostaphylos rubra
Primulaceae	Ardisia	Ardisia crenata
Primulaceae	Ardisia	Ardisia crispa
Primulaceae	Ardisia	Ardisia littoralis
Primulaceae	Ardisia	Ardisia guianensis
Primulaceae	Ardisia	Ardisia humilis
Primulaceae	Ardisia	Ardisia japonica
Primulaceae	Ardisia	Ardisia solanacea
Primulaceae	Ardisia	Ardisia wallichii
Arecaceae	Areca	Areca cathecu
Arecaceae	Areca	Areca hutchinsoniana
Caryophyllaceae	Arenaria	Arenaria oscensis
Caryophyllaceae	Arenaria	Arenaria armerina
Caryophyllaceae	Arenaria	Arenaria bertolonii
Caryophyllaceae	Arenaria	Arenaria multicaulis
Caryophyllaceae	Arenaria	Arenaria festucoides
Caryophyllaceae	Arenaria	Arenaria gracilis
Caryophyllaceae	Arenaria	Arenaria gypsophiloides var. gypsophiloides
Caryophyllaceae	Arenaria	Arenaria grandiflora
Caryophyllaceae	Arenaria	Arenaria grandiflora subsp. grandiflora
Caryophyllaceae	Arenaria	Arenaria obtusiloba
Caryophyllaceae	Arenaria	Arenaria pungens
Caryophyllaceae	Arenaria	Arenaria purpurascens
Caryophyllaceae	Arenaria	Arenaria serpyllifolia
Caryophyllaceae	Arenaria	Arenaria leptoclados
Arecaceae	Arenga	Arenga caudata
Arecaceae	Arenga	Arenga engleri
Arecaceae	Arenga	Arenga microcarpa
Arecaceae	Arenga	Arenga pinnata
Papaveraceae	Argemone	Argemone grandiflora
Papaveraceae	Argemone	Argemone mexicana
Papaveraceae	Argemone	Argemone ochroleuca
Papaveraceae	Argemone	Argemone platyceras
Papaveraceae	Argemone	Argemone polyanthemos
Papaveraceae	Argemone	Argemone subfusiformis
Not Found	Argentina	Argentina cineraria
Not Found	Argentina	Argentina egensis
Compositae	Argyranthemum	Argyranthemum broussonetii subsp. gomerensis
Compositae	Argyranthemum	Argyranthemum callichrysum
Compositae	Argyranthemum	Argyranthemum coronopifolium
Compositae	Argyranthemum	Argyranthemum foeniculaceum
Compositae	Argyranthemum	Argyranthemum frutescens
Compositae	Argyranthemum	Argyranthemum frutescens subsp. canariae
Compositae	Argyranthemum	Argyranthemum maderense
Compositae	Argyranthemum	Argyranthemum pinnatifidum
Compositae	Argyranthemum	Argyranthemum vicentii
Not Found	Cytisus	Cytisus battandieri
Aizoaceae	Argyroderma	Argyroderma delaetii
Leguminosae	Argyrolobium	Argyrolobium zanonii
Cactaceae	Ariocarpus	Ariocarpus agavoides
Cactaceae	Ariocarpus	Ariocarpus fissuratus var. hintonii
Cactaceae	Ariocarpus	Ariocarpus fissuratus
Cactaceae	Ariocarpus	Ariocarpus kotschoubeyanus subsp. albiflorus
Cactaceae	Ariocarpus	Ariocarpus retusus
Cactaceae	Ariocarpus	Ariocarpus retusus var. furfuraceus
Cactaceae	Ariocarpus	Ariocarpus trigonus
Araceae	Arisaema	Arisaema amurense
Araceae	Arisaema	Arisaema candidissimum
Araceae	Arisaema	Arisaema ciliatum var. liubaense
Araceae	Arisaema	Arisaema consanguineum
Araceae	Arisaema	Arisaema dracontium
Araceae	Arisaema	Arisaema fargesii
Araceae	Arisaema	Arisaema flavum
Araceae	Arisaema	Arisaema griffithii
Araceae	Arisaema	Arisaema heterophyllum
Araceae	Arisaema	Arisaema japonicum
Araceae	Arisaema	Arisaema urashima
Araceae	Arisaema	Arisaema tortuosum
Araceae	Arisaema	Arisaema tosaense
Araceae	Arisaema	Arisaema triphyllum subsp. triphyllum
Iridaceae	Aristea	Aristea bakeri
Iridaceae	Aristea	Aristea ecklonii
Poaceae	Aristida	Aristida purpurea
Aristolochiaceae	Aristolochia	Aristolochia arborea
Aristolochiaceae	Aristolochia	Aristolochia bottae
Aristolochiaceae	Aristolochia	Aristolochia clematitis
Aristolochiaceae	Aristolochia	Aristolochia contorta
Aristolochiaceae	Aristolochia	Aristolochia fimbriata
Aristolochiaceae	Aristolochia	Aristolochia gigantea
Aristolochiaceae	Aristolochia	Aristolochia gracilis
Aristolochiaceae	Aristolochia	Aristolochia grandiflora var. hookeri
Aristolochiaceae	Aristolochia	Aristolochia bodamae
Aristolochiaceae	Aristolochia	Aristolochia labiata
Aristolochiaceae	Aristolochia	Aristolochia lindneri
Aristolochiaceae	Aristolochia	Aristolochia elegans
Aristolochiaceae	Aristolochia	Aristolochia macrophylla
Aristolochiaceae	Aristolochia	Aristolochia macroura
Aristolochiaceae	Aristolochia	Aristolochia manshuriensis
Aristolochiaceae	Aristolochia	Aristolochia sempervirens
Aristolochiaceae	Aristolochia	Aristolochia tomentosa
Aristolochiaceae	Aristolochia	Aristolochia trilobata
Cactaceae	Armatocereus	Armatocereus matucanensis
Plumbaginaceae	Armeria	Armeria alliaceae
Plumbaginaceae	Armeria	Armeria alliacea subsp. matritensis
Plumbaginaceae	Armeria	Armeria alpina
Plumbaginaceae	Armeria	Armeria arenaria
Plumbaginaceae	Armeria	Armeria arenaria subsp. arenaria
Plumbaginaceae	Armeria	Armeria berlengensis
Plumbaginaceae	Armeria	Armeria caespitosa
Plumbaginaceae	Armeria	Armeria canescens
Plumbaginaceae	Armeria	Armeria canescens subsp. nebrodensis
Plumbaginaceae	Armeria	Armeria rumelica f. rhodopaea
Plumbaginaceae	Armeria	Armeria maritima subsp. andina
Plumbaginaceae	Armeria	Armeria denticulata
Plumbaginaceae	Armeria	Armeria gaditana
Plumbaginaceae	Armeria	Armeria girardii
Plumbaginaceae	Armeria	Armeria helodes
Plumbaginaceae	Armeria	Armeria juniperifolia
Plumbaginaceae	Armeria	Armeria macrophylla
Plumbaginaceae	Armeria	Armeria magellanica
Plumbaginaceae	Armeria	Armeria maritima subsp. sibirica
Plumbaginaceae	Armeria	Armeria maritima subsp. maritima
Plumbaginaceae	Armeria	Armeria maritima subsp. elongata
Plumbaginaceae	Armeria	Armeria maritima subsp. halleri
Plumbaginaceae	Armeria	Armeria purpurea
Plumbaginaceae	Armeria	Armeria maritima var. californica
Plumbaginaceae	Armeria	Armeria morisii
Plumbaginaceae	Armeria	Armeria pinifolia
Plumbaginaceae	Armeria	Armeria pseudarmeria
Plumbaginaceae	Armeria	Armeria japonica
Plumbaginaceae	Armeria	Armeria pubinervis
Plumbaginaceae	Armeria	Armeria pungens
Plumbaginaceae	Armeria	Armeria rhodopea
Plumbaginaceae	Armeria	Armeria rouyana
Plumbaginaceae	Armeria	Armeria ruscinonensis
Plumbaginaceae	Armeria	Armeria splendens
Plumbaginaceae	Armeria	Armeria transmontana
Plumbaginaceae	Armeria	Armeria villosa
Plumbaginaceae	Armeria	Armeria welwitschii
Brassicaceae	Armoracia	Armoracia rusticana
Boraginaceae	Arnebia	Arnebia pulchra
Compositae	Arnica	Arnica angustifolia
Compositae	Arnica	Arnica chamissonis
Compositae	Arnica	Arnica griscomii subsp. frigida
Compositae	Arnica	Arnica lanceolata subsp. prima
Compositae	Arnica	Arnica lanceolata
Compositae	Arnica	Arnica lessingii
Compositae	Arnica	Arnica lonchophylla
Compositae	Arnica	Arnica longifolia
Compositae	Arnica	Arnica mollis
Compositae	Arnica	Arnica montana
Compositae	Arnica	Arnica nevadense
Compositae	Arnica	Arnica parryi
Compositae	Arnica	Arnica rydbergii
Compositae	Arnica	Arnica sachalinensis
Compositae	Arnica	Arnica alpina
Compositae	Arnoseris	Arnoseris minima
Rosaceae	Aronia	Aronia arbutifolia
Rosaceae	Aronia	Aronia melanocarpa
Rosaceae	Aronia	Aronia melanocarpa var. melanocarpa
Rosaceae	Aronia	Aronia x miczurini
Rosaceae	Aronia	Aronia mitschurinii
Rosaceae	Aronia	Aronia x prunifolia
Poaceae	Arrhenatherum	Arrhenatherum alpinum
Poaceae	Arrhenatherum	Arrhenatherum elatius
Poaceae	Arrhenatherum	Arrhenatherum elatius subsp. bulbosum
Poaceae	Pseudarrhenatherum	Pseudarrhenatherum longifolium
Poaceae	Pseudarrhenatherum	Pseudarrhenatherum pallens
Annonaceae	Artabotrys	Artabotrys hexapetalus
Annonaceae	Artabotrys	Artabotrys hexapetalus f. suaveolens
Apiaceae	Artedia	Artedia squamata
Compositae	Artemisia	Artemisia abrotanum
Compositae	Artemisia	Artemisia absinthium
Compositae	Artemisia	Artemisia alba
Compositae	Artemisia	Artemisia annua
Compositae	Artemisia	Artemisia arborescens
Compositae	Artemisia	Artemisia argentea
Compositae	Artemisia	Artemisia atrata
Compositae	Artemisia	Artemisia austriaca
Compositae	Artemisia	Artemisia balchanorum
Compositae	Artemisia	Artemisia biennis
Compositae	Artemisia	Artemisia caerulescens subsp. gallica
Compositae	Artemisia	Artemisia campestris
Compositae	Artemisia	Artemisia marschaliana
Compositae	Artemisia	Artemisia campestris subsp. maritima
Compositae	Artemisia	Artemisia campestris subsp. glutinosa
Compositae	Artemisia	Artemisia campestris subsp. borealis
Compositae	Artemisia	Artemisia cana
Compositae	Artemisia	Artemisia chamaemelifolia subsp. chamaemelifolia
Compositae	Artemisia	Artemisia dracunculus
Compositae	Artemisia	Artemisia frigida
Compositae	Artemisia	Artemisia genipi
Compositae	Artemisia	Artemisia glacialis
Compositae	Artemisia	Artemisia gmelinii
Compositae	Artemisia	Artemisia herba-alba
Compositae	Artemisia	Artemisia lactiflora
Compositae	Artemisia	Artemisia lavandulaefolia
Compositae	Artemisia	Artemisia maritima
Compositae	Artemisia	Artemisia michauxiana
Compositae	Artemisia	Artemisia mongolica
Compositae	Artemisia	Artemisia pedemontana
Compositae	Artemisia	Artemisia pedunculosa
Compositae	Artemisia	Artemisia pontica
Compositae	Artemisia	Artemisia rupestris
Compositae	Artemisia	Artemisia scoparia
Compositae	Artemisia	Artemisia sieberi
Compositae	Artemisia	Artemisia stelleriana
Compositae	Artemisia	Artemisia thuscula
Compositae	Artemisia	Artemisia eriantha
Compositae	Artemisia	Artemisia umbelliformis
Compositae	Artemisia	Artemisia vallesiaca
Compositae	Artemisia	Artemisia verlotiorum
Compositae	Artemisia	Artemisia vulgaris
Amaranthaceae	Arthrocnemum	Arthrocnemum macrostachyum
Asparagaceae	Arthropodium	Arthropodium candidum
Asparagaceae	Arthropodium	Arthropodium cirrhatum
Asparagaceae	Arthropodium	Arthropodium minus
Melastomataceae	Arthrostemma	Arthrostemma parvifolium
Moraceae	Artocarpus	Artocarpus altilis
Moraceae	Artocarpus	Artocarpus camansi
Moraceae	Artocarpus	Artocarpus heterophyllus
Moraceae	Artocarpus	Artocarpus hypogyraeus
Moraceae	Artocarpus	Artocarpus lakoocha
Moraceae	Artocarpus	Artocarpus sericicarpus
Araceae	Arum	Arum apulum
Araceae	Arum	Arum balansanum
Araceae	Arum	Arum creticum
Araceae	Arum	Arum cylindraceum
Araceae	Arum	Arum cyrenaicum
Araceae	Arum	Arum dioscoridis
Araceae	Arum	Arum dioscoridis var. syriacum
Araceae	Arum	Arum elongatum
Araceae	Arum	Arum hygrophylum
Araceae	Arum	Arum albispatum
Araceae	Arum	Arum italicum
Araceae	Arum	Arum italicum var. neglectum
Araceae	Arum	Arum maculatum
Araceae	Arum	Arum nigrum
Araceae	Arum	Arum orientale
Araceae	Arum	Arum pictum
Araceae	Arum	Arum purpureospathum
Araceae	Arum	Arum conophalloides
Rosaceae	Aruncus	Aruncus kamtschaticus
Rosaceae	Aruncus	Aruncus dioicus var. astilboides
Rosaceae	Aruncus	Aruncus aethusifolius
Poaceae	Arundo	Arundo donax
Plantaginaceae	Asarina	Asarina antirrhiniflora
Plantaginaceae	Asarina	Asarina procumbens
Aristolochiaceae	Asarum	Asarum europaeum
Aristolochiaceae	Asarum	Asarum europaeum subsp. europaeum
Apocynaceae	Asclepias	Asclepias x cryptoceras
Apocynaceae	Asclepias	Asclepias curassavica
Apocynaceae	Asclepias	Asclepias exaltata
Apocynaceae	Asclepias	Asclepias incarnata
Apocynaceae	Asclepias	Asclepias ovalifolia
Apocynaceae	Asclepias	Asclepias speciosa
Apocynaceae	Asclepias	Asclepias syriaca
Apocynaceae	Asclepias	Asclepias tuberosa
Apocynaceae	Asclepias	Asclepias tuberosa subsp. interior
Apocynaceae	Asclepias	Asclepias linifolia
Apocynaceae	Asclepias	Asclepias viridis
Annonaceae	Asimina	Asimina triloba
Asparagaceae	Asparagus	Asparagus acutifolius
Asparagaceae	Asparagus	Asparagus aethiopicus
Asparagaceae	Asparagus	Asparagus albus
Asparagaceae	Asparagus	Asparagus asparagoides
Asparagaceae	Asparagus	Asparagus deflexus
Asparagaceae	Asparagus	Asparagus densiflorus
Asparagaceae	Asparagus	Asparagus densiflorus var. sprengeri
Asparagaceae	Asparagus	Asparagus falcatus
Asparagaceae	Asparagus	Asparagus maritimus
Asparagaceae	Asparagus	Asparagus officinalis
Asparagaceae	Asparagus	Asparagus officinalis subsp. prostratus
Asparagaceae	Asparagus	Asparagus oligoclonos
Asparagaceae	Asparagus	Asparagus plocamoides
Asparagaceae	Asparagus	Asparagus plumosus var. tenuissima
Asparagaceae	Asparagus	Asparagus pseudoscaber
Asparagaceae	Asparagus	Asparagus scandens
Asparagaceae	Asparagus	Asparagus schoberioides
Asparagaceae	Asparagus	Asparagus plumosus
Asparagaceae	Asparagus	Asparagus tenuifolius
Asparagaceae	Asparagus	Asparagus verticillatus
Boraginaceae	Asperugo	Asperugo procumbens
Rubiaceae	Asperula	Asperula arvensis
Rubiaceae	Asperula	Asperula cynanchica
Rubiaceae	Asperula	Asperula hexaphylla
Rubiaceae	Asperula	Asperula hirta
Rubiaceae	Asperula	Asperula involucrata
Rubiaceae	Asperula	Asperula nitida
Rubiaceae	Asperula	Asperula orientalis
Rubiaceae	Asperula	Asperula setosa
Rubiaceae	Asperula	Asperula taurina subsp. leucanthera
Rubiaceae	Asperula	Asperula creticola
Rubiaceae	Asperula	Asperula tinctoria
Xanthorrhoeaceae	Asphodeline	Asphodeline brevicaulis
Xanthorrhoeaceae	Asphodeline	Asphodeline liburnica
Xanthorrhoeaceae	Asphodeline	Asphodeline lutea
Xanthorrhoeaceae	Asphodeline	Asphodeline taurica
Xanthorrhoeaceae	Asphodelus	Asphodelus aestivus
Xanthorrhoeaceae	Asphodelus	Asphodelus albus
Xanthorrhoeaceae	Asphodelus	Asphodelus albus subsp. delphinensis
Xanthorrhoeaceae	Asphodelus	Asphodelus cerasiferus
Xanthorrhoeaceae	Asphodelus	Asphodelus fistulosus
Xanthorrhoeaceae	Asphodelus	Asphodelus albus subsp. villarsii
Xanthorrhoeaceae	Asphodelus	Asphodelus macrocarpus subsp. arrondeaui
Xanthorrhoeaceae	Asphodelus	Asphodelus ramosus
Xanthorrhoeaceae	Asphodelus	Asphodelus ramosus subsp. anno
Asparagaceae	Aspidistra	Aspidistra elatior
Malpighiaceae	Aspidopterys	Aspidopterys elliptica
Aspleniaceae	Asplenium	Asplenium adiantum-nigrum subsp. adiantum-nigrum
Aspleniaceae	Asplenium	Asplenium adiantum-nigrum
Aspleniaceae	Asplenium	Asplenium adulterinum
Aspleniaceae	Asplenium	Asplenium antiquum
Aspleniaceae	Diplazium	Diplazium bantamense
Aspleniaceae	Asplenium	Asplenium boltonii
Aspleniaceae	Asplenium	Asplenium bulbiferum
Aspleniaceae	Asplenium	Asplenium ceterach subsp. bivalens
Aspleniaceae	Asplenium	Asplenium ceterach subsp. ceterach
Aspleniaceae	Asplenium	Asplenium cuneifolium
Aspleniaceae	Asplenium	Asplenium dimorphum
Aspleniaceae	Asplenium	Asplenium fissum
Aspleniaceae	Asplenium	Asplenium ruta-muraria subsp. dolomiticum
Aspleniaceae	Asplenium	Asplenium harpeodes
Aspleniaceae	Asplenium	Asplenium hemionitis
Aspleniaceae	Asplenium	Asplenium mayi
Aspleniaceae	Asplenium	Asplenium nidus
Aspleniaceae	Asplenium	Asplenium nigrum
Aspleniaceae	Asplenium	Asplenium fontanum subsp. fontanum
Aspleniaceae	Asplenium	Asplenium onopteris
Aspleniaceae	Asplenium	Asplenium ruta
Aspleniaceae	Asplenium	Asplenium ruta-muraria
Aspleniaceae	Asplenium	Asplenium trichomanes subsp. hastatum
Aspleniaceae	Asplenium	Asplenium trichomanes subsp. inexpectans
Aspleniaceae	Asplenium	Asplenium salicifolium
Aspleniaceae	Asplenium	Asplenium scolopendrium
Aspleniaceae	Asplenium	Asplenium obovatum subsp. lanzeolatum
Aspleniaceae	Asplenium	Asplenium septentrionale
Aspleniaceae	Asplenium	Asplenium trichomanes subsp. quadrivalens
Aspleniaceae	Asplenium	Asplenium auritum
Aspleniaceae	Asplenium	Asplenium trichomanes
Aspleniaceae	Asplenium	Asplenium ruta-muraria subsp. ruta-muraria
Aspleniaceae	Asplenium	Asplenium scolopendrium subsp. scolopendrium
Aspleniaceae	Asplenium	Asplenium septentrionale subsp. septentrionale
Aspleniaceae	Asplenium	Asplenium viride
Aspleniaceae	Caenopteris	Caenopteris daucifolium
Aspleniaceae	Asplenium	Asplenium fontanum
Compositae	Aster	Aster ageratoides var. scaberulus
Compositae	Aster	Aster alpinus
Compositae	Aster	Aster alpinus var. polycephalus
Compositae	Aster	Aster amellus
Compositae	Aster	Aster bessarabicus
Compositae	Aster	Aster diplostephioides
Compositae	Aster	Aster dumosus
Compositae	Aster	Aster farreri
Compositae	Aster	Aster flaccidus subsp. flaccidus
Compositae	Aster	Aster himalaicus
Compositae	Aster	Aster iinumae
Compositae	Kalimeris	Kalimeris lautureana
Compositae	Aster	Aster japonicus
Compositae	Aster	Aster novi
Compositae	Aster	Aster pyrenaeus
Compositae	Aster	Aster sibiricus
Compositae	Aster	Aster squamatus
Compositae	Aster	Aster tataricus
Compositae	Aster	Aster thomsonii
Compositae	Aster	Aster tongolensis
Compositae	Aster	Aster yunnanensis
Compositae	Asteriscus	Asteriscus graveolens subsp. stenophyllus
Compositae	Asteriscus	Asteriscus sericeus
Saxifragaceae	Astilbe	Astilbe x arendsii
Saxifragaceae	Astilbe	Astilbe biternata
Saxifragaceae	Astilbe	Astilbe grandis
Saxifragaceae	Astilbe	Astilbe japonica
Saxifragaceae	Astilbe	Astilbe microphylla
Saxifragaceae	Astilbe	Astilbe myriantha
Saxifragaceae	Astilbe	Astilbe thunbergii
Saxifragaceae	Astilbe	Astilbe thunbergii var. congesta
Saxifragaceae	Astilbe	Astilbe thunbergii var. fujisanensis
Saxifragaceae	Astilboides	Astilboides tabularis
Leguminosae	Astragalus	Astragalus gummifer
Leguminosae	Astragalus	Astragalus microcephalus
Leguminosae	Astragalus	Astragalus albicaulis
Leguminosae	Astragalus	Astragalus alopecuroides
Leguminosae	Astragalus	Astragalus alopecurus
Leguminosae	Astragalus	Astragalus alpinus subsp. arcticus
Leguminosae	Astragalus	Astragalus alpinus
Leguminosae	Astragalus	Astragalus aquilanus
Leguminosae	Astragalus	Astragalus arenarius
Leguminosae	Astragalus	Astragalus australis
Leguminosae	Astragalus	Astragalus austriacus
Leguminosae	Astragalus	Astragalus chinensis
Leguminosae	Astragalus	Astragalus cicer
Leguminosae	Astragalus	Astragalus danicus
Leguminosae	Astragalus	Astragalus depressus
Leguminosae	Astragalus	Astragalus exscapus
Leguminosae	Astragalus	Astragalus falcatus
Leguminosae	Astragalus	Astragalus frigidus
Leguminosae	Astragalus	Astragalus galegiformis
Leguminosae	Astragalus	Astragalus glycyphyllos
Leguminosae	Astragalus	Astragalus hamosus
Leguminosae	Astragalus	Astragalus hymenostegis
Leguminosae	Astragalus	Astragalus purpureus
Leguminosae	Astragalus	Astragalus incanus
Leguminosae	Astragalus	Astragalus kirindicus
Leguminosae	Astragalus	Astragalus mongolicus
Leguminosae	Astragalus	Astragalus monspessulanus
Leguminosae	Astragalus	Astragalus nevadensis subsp. nevadensis
Leguminosae	Astragalus	Astragalus onobrychis
Leguminosae	Astragalus	Astragalus onobrychis subsp. onobrychis
Leguminosae	Biserrula	Biserrula pelecinus
Leguminosae	Astragalus	Astragalus penduliflorus
Leguminosae	Astragalus	Astragalus peterfii
Leguminosae	Astragalus	Astragalus ponticus
Leguminosae	Astragalus	Astragalus membranaceus
Leguminosae	Astragalus	Astragalus schahrudensis
Leguminosae	Astragalus	Astragalus schimperi
Leguminosae	Astragalus	Astragalus sempervirens
Leguminosae	Astragalus	Astragalus sieversianus
Leguminosae	Astragalus	Astragalus siliquosus
Leguminosae	Astragalus	Astragalus massiliensis
Leguminosae	Astragalus	Astragalus vesicarius
Leguminosae	Astragalus	Astragalus carniolicus
Apiaceae	Astrantia	Astrantia bavarica
Apiaceae	Astrantia	Astrantia carniolica
Apiaceae	Astrantia	Astrantia major
Apiaceae	Astrantia	Astrantia major var. croatica
Apiaceae	Astrantia	Astrantia major subsp. carinthiaca
Apiaceae	Astrantia	Astrantia major subsp. major
Apiaceae	Astrantia	Astrantia major subsp. elatior
Apiaceae	Astrantia	Astrantia maxima
Apiaceae	Astrantia	Astrantia ranunculifolia
Not Found	Astrocasia	Astrocasia microcarpa
Apiaceae	Astrodaucus	Astrodaucus orientalis
Cactaceae	Astrophytum	Astrophytum asterias
Cactaceae	Astrophytum	Astrophytum capricorne
Cactaceae	Astrophytum	Astrophytum myriostigma var. multicostatum
Cactaceae	Astrophytum	Astrophytum columnare
Cactaceae	Astrophytum	Astrophytum capricorne var. niveum
Cactaceae	Astrophytum	Astrophytum glabrescens
Apiaceae	Astydamia	Astydamia latifolia
Campanulaceae	Asyneuma	Asyneuma campanuloides
Campanulaceae	Asyneuma	Asyneuma canescens
Campanulaceae	Asyneuma	Asyneuma limonifolia
Acanthaceae	Asystasia	Asystasia nemorum
Apiaceae	Athamanta	Athamanta cretensis
Apiaceae	Athamanta	Athamanta montana
Apiaceae	Athamanta	Athamanta sicula
Apiaceae	Athamanta	Athamanta turbith subsp. haynaldii
Apiaceae	Athamanta	Athamanta turbith
Compositae	Athanasia	Athanasia trifurcata
Athyriaceae	Athyrium	Athyrium accedens
Athyriaceae	Athyrium	Athyrium distentifolium
Athyriaceae	Athyrium	Athyrium atkinsonii
Athyriaceae	Athyrium	Athyrium clivicola
Athyriaceae	Athyrium	Athyrium distentifolium var. distentifolium
Athyriaceae	Athyrium	Athyrium filix-femina subsp. angustum
Athyriaceae	Athyrium	Athyrium filix-femina
Athyriaceae	Athyrium	Athyrium filix-femina var. angustum
Athyriaceae	Athyrium	Athyrium frangulum
Athyriaceae	Athyrium	Athyrium monomachii
Athyriaceae	Athyrium	Athyrium nikkoense
Athyriaceae	Athyrium	Athyrium otophorum var. okanum
Athyriaceae	Athyrium	Athyrium niponicum var. pictum
Athyriaceae	Athyrium	Athyrium rupestre
Athyriaceae	Athyrium	Athyrium rupicola
Athyriaceae	Athyrium	Athyrium sinense
Athyriaceae	Pseudocystopteris	Pseudocystopteris spinulosa
Athyriaceae	Athyrium	Athyrium vidalii
Athyriaceae	Athyrium	Athyrium yokoscense
Rubiaceae	Atractocarpus	Atractocarpus fitzalanii
Compositae	Atractylis	Atractylis cancellata
Compositae	Atractylodes	Atractylodes ovata
Polygonaceae	Atraphaxis	Atraphaxis caucasica
Polygonaceae	Atraphaxis	Atraphaxis frutescens
Polygonaceae	Atraphaxis	Atraphaxis spinosa
Amaranthaceae	Atriplex	Atriplex aucheri
Amaranthaceae	Atriplex	Atriplex griffithii
Amaranthaceae	Atriplex	Atriplex halimus
Amaranthaceae	Atriplex	Atriplex hortensis
Amaranthaceae	Atriplex	Atriplex hortensis var. lutea
Amaranthaceae	Atriplex	Atriplex hortensis var. rubra
Amaranthaceae	Atriplex	Atriplex hortensis var. rubra
Amaranthaceae	Atriplex	Atriplex laciniata
Amaranthaceae	Atriplex	Atriplex lampa
Amaranthaceae	Atriplex	Atriplex lindleyi
Amaranthaceae	Atriplex	Atriplex littoralis
Amaranthaceae	Atriplex	Atriplex micrantha
Amaranthaceae	Atriplex	Atriplex nummularia
Amaranthaceae	Atriplex	Atriplex oblongifolia
Amaranthaceae	Atriplex	Atriplex patula
Amaranthaceae	Halimione	Halimione pedunculata
Amaranthaceae	Halimione	Halimione portulacoides
Amaranthaceae	Atriplex	Atriplex prostata
Amaranthaceae	Atriplex	Atriplex prostrata subsp. calotheca
Amaranthaceae	Atriplex	Atriplex prostrata subsp. prostrata
Amaranthaceae	Atriplex	Atriplex rosea
Amaranthaceae	Atriplex	Atriplex sagittata
Amaranthaceae	Atriplex	Atriplex semibaccata
Amaranthaceae	Atriplex	Atriplex tatarica
Solanaceae	Atropa	Atropa baetica
Solanaceae	Atropa	Atropa bella-donna
Solanaceae	Atropa	Atropa belladonna var. lutea
Solanaceae	Atropa	Atropa bella-donna var. lutea
Solanaceae	Atropa	Atropa jaujasija
Arecaceae	Attalea	Attalea cohune
Brassicaceae	Aubrieta	Aubrieta canescens subsp. cilicica
Brassicaceae	Aubrieta	Aubrieta canescens subsp. macrostyla
Brassicaceae	Aubrieta	Aubrieta columnae subsp. columnae
Brassicaceae	Aubrieta	Aubrieta columnae subsp. croatica
Brassicaceae	Aubrieta	Aubrieta x cultorum
[truncated: 14,224 more rows]
