# Supplementary material for: Integrating Biodiversity Data into Botanic Collections
Source: Biodivers Data J. 2016 May 20;(4):e7971. doi: 10.3897/BDJ.4.e7971 (PMC4910503; doi:10.3897/BDJ.4.e7971)
Supplement: Supplementary material 3 — Verified names and taxonomic status provided by COL, EOL and TPL [file biodiversity_data_journal-4-e7971-s003.csv]

Family	Genus	Taxon	Alternative	Source	SourceId	Status
Caprifoliaceae	Abelia	Abelia chinensis		COL	20334149	synonym
Caprifoliaceae	Abelia	Abelia floribunda		COL	20334153	synonym
Caprifoliaceae	Abelia	Abelia mosanensis		COL	20334190	synonym
Caprifoliaceae	Abelia	Abelia triflora		COL	20334189	synonym
Caprifoliaceae	Abelia	Abelia chinensis		EOL	7018281	title
Caprifoliaceae	Abelia	Abelia x grandiflora		EOL	597493	content
Caprifoliaceae	Abelia	Abelia mosanensis		EOL	5234483	content
Caprifoliaceae	Abelia	Abelia triflora		EOL	2877405	content
Caprifoliaceae	Abelia	Abelia floribunda		EOL	5234456	title
Not Found	Abeliophyllum	Abeliophyllum distichum		COL	19206288	accepted name
Not Found	Abeliophyllum	Abeliophyllum distichum		EOL	5656298	title
Malvaceae	Abelmoschus	Abelmoschus manihot		COL	20267486	accepted name
Malvaceae	Abelmoschus	Abelmoschus moschatus		COL	20267492	accepted name
Malvaceae	Abelmoschus	Abelmoschus manihot		EOL	584457	title
Malvaceae	Abelmoschus	Abelmoschus moschatus		EOL	584456	title
Pinaceae	Abies	Abies alba		COL	18158285	accepted name
Pinaceae	Abies	Abies balsamea		COL	18158302	accepted name
Pinaceae	Abies	Abies cephalonica		COL	18158290	accepted name
Pinaceae	Abies	Abies firma		COL	18158286	accepted name
Pinaceae	Abies	Abies holophylla		COL	18158282	accepted name
Pinaceae	Abies	Abies koreana		COL	18158273	accepted name
Pinaceae	Abies	Abies bornmuelleriana		COL	18158060	synonym
Pinaceae	Abies	Abies nordmanniana		COL	18158524	accepted name
Pinaceae	Abies	Abies pinsapo		COL	18158303	accepted name
Pinaceae	Abies	Abies procera		COL	18158249	accepted name
Pinaceae	Abies	Abies sibirica		COL	18158269	accepted name
Pinaceae	Abies	Abies alba		EOL	1033070	title
Pinaceae	Abies	Abies balsamea		EOL	1061732	title
Pinaceae	Abies	Abies cephalonica		EOL	990960	title
Pinaceae	Abies	Abies cilicica		EOL	1061731	title
Pinaceae	Abies	Abies concolor var. concolor		EOL	2496705	title
Pinaceae	Abies	Abies firma		EOL	1033072	title
Pinaceae	Abies	Abies holophylla		EOL	1033081	title
Pinaceae	Abies	Abies koreana		EOL	991315	title
Pinaceae	Abies	Abies bornmuelleriana		EOL	1274279	content
Pinaceae	Abies	Abies nordmanniana		EOL	330602	title
Pinaceae	Abies	Abies numidica		EOL	1034952	title
Pinaceae	Abies	Abies pinsapo		EOL	1061726	title
Pinaceae	Abies	Abies procera		EOL	1033079	title
Pinaceae	Abies	Abies sibirica		EOL	1061714	title
Malvaceae	Abroma	Abroma augustum		EOL	2877408	title
Malvaceae	Abroma	Abroma augustum	Abroma augusta	COL	20264406	accepted name
Nyctaginaceae	Abronia	Abronia fragrans		COL	15302400	accepted name
Nyctaginaceae	Abronia	Abronia fragrans		EOL	596060	title
Leguminosae	Abrus	Abrus precatorius		COL	11469311	accepted name
Leguminosae	Abrus	Abrus schimperi		COL	11469312	accepted name
Leguminosae	Abrus	Abrus precatorius		EOL	642979	title
Leguminosae	Abrus	Abrus schimperi		EOL	641996	title
Malvaceae	Abutilon	Abutilon arboreum		COL	20268204	synonym
Malvaceae	Abutilon	Abutilon grandifolium		COL	20268119	accepted name
Malvaceae	Abutilon	Abutilon indicum		COL	20268137	accepted name
Malvaceae	Abutilon	Abutilon mollissimum		COL	20268177	accepted name
Malvaceae	Abutilon	Abutilon darwinii		COL	20268708	synonym
Malvaceae	Abutilon	Abutilon theophrasti		COL	20268242	accepted name
Malvaceae	Abutilon	Abutilon vitifolium		COL	20268046	synonym
Malvaceae	Abutilon	Abutilon darwinii		EOL	5409242	title
Malvaceae	Abutilon	Abutilon grandifolium		EOL	584743	content
Malvaceae	Abutilon	Abutilon indicum		EOL	592448	title
Malvaceae	Abutilon	Abutilon mollissimum		EOL	584758	content
Malvaceae	Abutilon	Abutilon arboreum		EOL	584676	content
Malvaceae	Abutilon	Abutilon theophrasti		EOL	584739	title
Malvaceae	Abutilon	Abutilon vitifolium		EOL	5409682	content
Malvaceae	Abutilon	Abutilon megapotanicum	Abutilon megapotamicum	COL	20268170	accepted name
Malvaceae	Abutilon	Abutilon megapotanicum	Abutilon megapotamicum	EOL	5409366	title
Leguminosae	Acacia	Acacia adunca		COL	11468214	accepted name
Leguminosae	Acacia	Acacia aestivalis		COL	11485128	accepted name
Leguminosae	Acacia	Acacia boormanii		COL	11482363	accepted name
Leguminosae	Acacia	Acacia brachystachya		COL	11485904	accepted name
Leguminosae	Acacia	Acacia calamifolia		COL	11479201	accepted name
Leguminosae	Acacia	Acacia cardiophylla		COL	11479202	accepted name
Leguminosae	Acacia	Acacia catechu		COL	11479619	accepted name
Leguminosae	Acacia	Acacia cyclops		COL	11468253	accepted name
Leguminosae	Acacia	Acacia dealbata		COL	11468226	accepted name
Leguminosae	Acacia	Acacia deanei		COL	11485090	accepted name
Leguminosae	Acacia	Acacia decurrens		COL	11468227	accepted name
Leguminosae	Acacia	Acacia dodonaeifolia		COL	11485296	accepted name
Leguminosae	Acacia	Acacia elata		COL	11468229	accepted name
Leguminosae	Acacia	Acacia farnesiana		COL	11468263	accepted name
Leguminosae	Acacia	Acacia fimbriata		COL	11468264	accepted name
Leguminosae	Acacia	Acacia glaucoptera		COL	11485257	accepted name
Leguminosae	Acacia	Acacia iteaphylla		COL	11479451	accepted name
Leguminosae	Acacia	Acacia julifera		COL	11485856	accepted name
Leguminosae	Acacia	Acacia karroo		COL	11468273	accepted name
Leguminosae	Acacia	Acacia leprosa		COL	11480560	accepted name
Leguminosae	Acacia	Acacia littorea		COL	11485641	accepted name
Leguminosae	Acacia	Acacia longifolia		COL	11468413	accepted name
Leguminosae	Acacia	Acacia macradenia		COL	11485166	accepted name
Leguminosae	Acacia	Acacia mearnsii		COL	11468282	accepted name
Leguminosae	Acacia	Acacia melanoxylon		COL	11468309	accepted name
Leguminosae	Acacia	Acacia menzelii		COL	11485748	accepted name
Leguminosae	Acacia	Acacia montana		COL	11479209	accepted name
Leguminosae	Acacia	Acacia nilotica subsp. leiocarpa		COL	11488277	accepted name
Leguminosae	Acacia	Acacia armata		COL	11468045	accepted name
Leguminosae	Acacia	Acacia pendula		COL	11468286	accepted name
Leguminosae	Acacia	Acacia perangusta		COL	11485131	accepted name
Leguminosae	Acacia	Acacia podalyriifolia		COL	11468314	accepted name
Leguminosae	Acacia	Acacia prominens		COL	11479303	accepted name
Leguminosae	Acacia	Acacia pubescens		COL	11485066	accepted name
Leguminosae	Acacia	Acacia redolens		COL	11485761	accepted name
Leguminosae	Acacia	Acacia cavenia		COL	11478208	synonym
Leguminosae	Acacia	Acacia rubida		COL	11479274	accepted name
Leguminosae	Acacia	Acacia saligna		COL	11468415	accepted name
Leguminosae	Acacia	Acacia sertiformis		COL	11485204	accepted name
Leguminosae	Acacia	Acacia sieberiana		COL	11468422	accepted name
Leguminosae	Acacia	Acacia spectabilis		COL	11484671	accepted name
Leguminosae	Acacia	Acacia triptera		COL	11485525	accepted name
Leguminosae	Acacia	Acacia verticillata		COL	11477361	accepted name
Leguminosae	Acacia	Acacia visco		COL	11477363	accepted name
Leguminosae	Acacia	Acacia retinoides		COL	11479573	synonym
Leguminosae	Acacia	Acacia adunca		EOL	647962	title
Leguminosae	Acacia	Acacia aestivalis		EOL	655364	title
Leguminosae	Acacia	Acacia boormanii		EOL	645798	title
Leguminosae	Acacia	Acacia brachystachya		EOL	661158	title
Leguminosae	Acacia	Acacia calamifolia		EOL	644230	title
Leguminosae	Acacia	Acacia cardiophylla		EOL	644231	title
Leguminosae	Acacia	Acacia catechu		EOL	0	Ambiguous
Leguminosae	Acacia	Acacia cavenia		EOL	642102	content
Leguminosae	Acacia	Acacia cyclops		EOL	661835	title
Leguminosae	Acacia	Acacia dealbata		EOL	684065	title
Leguminosae	Acacia	Acacia deanei		EOL	647248	title
Leguminosae	Acacia	Acacia decurrens		EOL	0	Ambiguous
Leguminosae	Acacia	Acacia dodonaeifolia		EOL	660737	title
Leguminosae	Acacia	Acacia elata		EOL	666957	title
Leguminosae	Acacia	Acacia farnesiana		EOL	684149	title
Leguminosae	Acacia	Acacia fimbriata		EOL	684160	title
Leguminosae	Acacia	Acacia glaucoptera		EOL	660724	title
Leguminosae	Acacia	Acacia iteaphylla		EOL	643893	title
Leguminosae	Acacia	Acacia julifera		EOL	661110	title
Leguminosae	Acacia	Acacia karroo		EOL	0	Ambiguous
Leguminosae	Acacia	Acacia leprosa		EOL	645118	title
Leguminosae	Acacia	Acacia littorea		EOL	660597	title
Leguminosae	Acacia	Acacia longifolia		EOL	690308	title
Leguminosae	Acacia	Acacia macradenia		EOL	655300	title
Leguminosae	Acacia	Acacia mearnsii		EOL	686955	title
Leguminosae	Acacia	Acacia melanoxylon		EOL	8684941	title
Leguminosae	Acacia	Acacia menzelii		EOL	660747	title
Leguminosae	Acacia	Acacia montana		EOL	643381	title
Leguminosae	Acacia	Acacia nilotica subsp. leiocarpa		EOL	1230728	title
Leguminosae	Acacia	Acacia armata		EOL	648693	content
Leguminosae	Acacia	Acacia pendula		EOL	688908	title
Leguminosae	Acacia	Acacia perangusta		EOL	655401	title
Leguminosae	Acacia	Acacia podalyriifolia		EOL	691015	title
Leguminosae	Acacia	Acacia prominens		EOL	643374	title
Leguminosae	Acacia	Acacia pubescens		EOL	647242	title
Leguminosae	Acacia	Acacia redolens		EOL	660800	title
Leguminosae	Acacia	Acacia retinoides		EOL	11222319	title
Leguminosae	Acacia	Acacia rubida		EOL	643389	title
Leguminosae	Acacia	Acacia saligna		EOL	690383	title
Leguminosae	Acacia	Acacia sertiformis		EOL	655440	title
Leguminosae	Acacia	Acacia sieberiana		EOL	0	Ambiguous
Leguminosae	Acacia	Acacia spectabilis		EOL	647239	title
Leguminosae	Acacia	Acacia triptera		EOL	661228	title
Leguminosae	Acacia	Acacia verticillata		EOL	640002	title
Leguminosae	Acacia	Acacia visco		EOL	640004	title
Leguminosae	Acacia	Acacia parvissima	Acacia pravissima	COL	11482479	accepted name
Leguminosae	Acacia	Acacia parvissima	Acacia pravissima	EOL	646758	title
Rosaceae	Acaena	Acaena anserinifolia		COL	20240609	accepted name
Rosaceae	Acaena	Acaena antarctica		COL	20240610	accepted name
Rosaceae	Acaena	Acaena argentea		COL	20240611	accepted name
Rosaceae	Acaena	Acaena buchananii		COL	20240612	accepted name
Rosaceae	Acaena	Acaena caesiiglauca		COL	20240616	accepted name
Rosaceae	Acaena	Acaena fissistipula		COL	20240631	accepted name
Rosaceae	Acaena	Acaena magellanica		COL	20240648	accepted name
Rosaceae	Acaena	Acaena minor		COL	20240654	accepted name
Rosaceae	Acaena	Acaena novae-zelandiae		COL	20240658	accepted name
Rosaceae	Acaena	Acaena ovalifolia		COL	20240659	accepted name
Rosaceae	Acaena	Acaena hieronymi		COL	20240657	synonym
Rosaceae	Acaena	Acaena pallida		COL	20240664	accepted name
Rosaceae	Acaena	Acaena pinnatifida		COL	20240666	accepted name
Rosaceae	Acaena	Acaena platyacantha		COL	20240668	accepted name
Rosaceae	Acaena	Acaena poeppigiana		COL	20240669	accepted name
Rosaceae	Acaena	Acaena saccaticupula		COL	20240674	accepted name
Rosaceae	Acaena	Acaena sericea		COL	20240677	accepted name
Rosaceae	Acaena	Acaena ovina subsp. maxima		COL	20240662	synonym
Rosaceae	Acaena	Acaena viridior		COL	20240609	synonym
Rosaceae	Acaena	Acaena anserinifolia		EOL	632620	title
Rosaceae	Acaena	Acaena antarctica		EOL	412583	title
Rosaceae	Acaena	Acaena argentea		EOL	637528	title
Rosaceae	Acaena	Acaena buchananii		EOL	633240	title
Rosaceae	Acaena	Acaena caesiiglauca		EOL	633242	title
Rosaceae	Acaena	Acaena fissistipula		EOL	631366	title
Rosaceae	Acaena	Acaena magellanica		EOL	229556	title
Rosaceae	Acaena	Acaena microphylla		EOL	637655	title
Rosaceae	Acaena	Acaena minor		EOL	629198	title
Rosaceae	Acaena	Acaena hieronymi		EOL	794351	content
Rosaceae	Acaena	Acaena novae-zelandiae		EOL	794352	title
Rosaceae	Acaena	Acaena ovalifolia		EOL	629197	title
Rosaceae	Acaena	Acaena pallida		EOL	629706	title
Rosaceae	Acaena	Acaena pinnatifida		EOL	0	Ambiguous
Rosaceae	Acaena	Acaena platyacantha		EOL	230885	title
Rosaceae	Acaena	Acaena poeppigiana		EOL	230886	title
Rosaceae	Acaena	Acaena saccaticupula		EOL	630704	title
Rosaceae	Acaena	Acaena sericea		EOL	0	Ambiguous
Rosaceae	Acaena	Acaena viridior		EOL	301280	title
Rosaceae	Acaena	Acaena cespitosa	Acaena caespitosa	COL	20240618	accepted name
Rosaceae	Acaena	Acaena microphylla	Acaena microphylia	COL	20240650	accepted name
Rosaceae	Acaena	Acaena cespitosa	Acaena caespitosa	EOL	637529	title
Rosaceae	Acaena	Acaena ovina subsp. maxima	NA	EOL	1245516	title
Euphorbiaceae	Acalypha	Acalypha amentacea var. amentacea		COL	19027736	accepted name
Euphorbiaceae	Acalypha	Acalypha hispida		COL	19331327	accepted name
Euphorbiaceae	Acalypha	Acalypha virginica		COL	18994471	accepted name
Euphorbiaceae	Acalypha	Acalypha amentacea var. amentacea		EOL	1143462	title
Euphorbiaceae	Acalypha	Acalypha hispida		EOL	1145525	title
Euphorbiaceae	Acalypha	Acalypha virginica		EOL	1153892	title
Cactaceae	Acanthocalycium	Acanthocalycium spiniflorum		COL	13439076	synonym
Cactaceae	Acanthocalycium	Acanthocalycium thionanthum		COL	13439022	synonym
Cactaceae	Acanthocalycium	Acanthocalycium spiniflorum		EOL	5187231	content
Cactaceae	Acanthocalycium	Acanthocalycium thionanthum	NA	EOL	5187216	content
Plumbaginaceae	Acantholimon	Acantholimon acerosum		COL	15303183	accepted name
Plumbaginaceae	Acantholimon	Acantholimon araxanum		COL	15303200	accepted name
Plumbaginaceae	Acantholimon	Acantholimon armenum		COL	15303203	accepted name
Plumbaginaceae	Acantholimon	Acantholimon caryophyllaceum		COL	15303238	accepted name
Plumbaginaceae	Acantholimon	Acantholimon glumaceum		COL	0	Ambiguous (2)
Plumbaginaceae	Acantholimon	Acantholimon hohenackeri		COL	0	Ambiguous (2)
Plumbaginaceae	Acantholimon	Acantholimon kotschyi		COL	0	Ambiguous (2)
Plumbaginaceae	Acantholimon	Acantholimon litvinovii		COL	15303339	accepted name
Plumbaginaceae	Acantholimon	Acantholimon venustum		COL	15303452	accepted name
Plumbaginaceae	Acantholimon	Acantholimon bracteatum var. capitatum		COL	15303236	synonym
Plumbaginaceae	Acantholimon	Acantholimon acerosum		EOL	5490255	title
Plumbaginaceae	Acantholimon	Acantholimon caryophyllaceum		EOL	5490325	title
Plumbaginaceae	Acantholimon	Acantholimon glumaceum		EOL	2899764	title
Plumbaginaceae	Acantholimon	Acantholimon araxanum	NA	EOL	5490280	title
Plumbaginaceae	Acantholimon	Acantholimon armenum	NA	EOL	5490283	title
Plumbaginaceae	Acantholimon	Acantholimon bracteatum var. capitatum	NA	EOL	27717497	title
Plumbaginaceae	Acantholimon	Acantholimon hohenackeri	NA	EOL	5490402	title
Plumbaginaceae	Acantholimon	Acantholimon kotschyi	NA	EOL	5490434	title
Plumbaginaceae	Acantholimon	Acantholimon litvinovii	NA	EOL	5490452	title
Plumbaginaceae	Acantholimon	Acantholimon venustum	NA	EOL	5490597	title
Cactaceae	Acantholobivia	Acantholobivia tegeleriana		COL	13439018	synonym
Cactaceae	Acantholobivia	Acantholobivia tegeleriana	NA	EOL	5187243	content
Araliaceae	Acanthopanax	Acanthopanax divaricatus		COL	19328762	synonym
Araliaceae	Acanthopanax	Acanthopanax giraldii		COL	19328770	synonym
Araliaceae	Acanthopanax	Acanthopanax sessiliflorus		COL	19328829	synonym
Araliaceae	Acanthopanax	Acanthopanax wardii		COL	19328861	synonym
Araliaceae	Acanthopanax	Acanthopanax divaricatus		EOL	1145595	content
Araliaceae	Acanthopanax	Acanthopanax giraldii		EOL	1145593	content
Araliaceae	Acanthopanax	Acanthopanax sessiliflorus		EOL	1145574	content
Araliaceae	Acanthopanax	Acanthopanax wardii	NA	EOL	1145563	content
Compositae	Acanthospermum	Acanthospermum hispidum		COL	17796475	provisionally accepted name
Compositae	Acanthospermum	Acanthospermum hispidum		EOL	468702	title
Bromeliaceae	Acanthostachys	Acanthostachys pitcairnioides		COL	19070959	accepted name
Bromeliaceae	Acanthostachys	Acanthostachys strobilacea		COL	19070960	accepted name
Bromeliaceae	Acanthostachys	Acanthostachys pitcairnioides		EOL	1127512	title
Bromeliaceae	Acanthostachys	Acanthostachys strobilacea		EOL	1127511	title
Acanthaceae	Acanthus	Acanthus dioscoridis var. perringii		COL	20317742	accepted name
Acanthaceae	Acanthus	Acanthus hungaricus		COL	20317755	accepted name
Acanthaceae	Acanthus	Acanthus ilicifolius		COL	20317756	accepted name
Acanthaceae	Acanthus	Acanthus mollis subsp. mollis		COL	20317060	accepted name
Acanthaceae	Acanthus	Acanthus montanus		COL	20317062	accepted name
Acanthaceae	Acanthus	Acanthus spinosus		COL	20317067	accepted name
Acanthaceae	Acanthus	Acanthus longifolius		COL	20317755	synonym
Acanthaceae	Acanthus	Acanthus hungaricus		EOL	6928273	title
Acanthaceae	Acanthus	Acanthus ilicifolius		EOL	3102223	title
Acanthaceae	Acanthus	Acanthus longifolius		EOL	6928285	title
Acanthaceae	Acanthus	Acanthus mollis subsp. mollis		EOL	33559724	title
Acanthaceae	Acanthus	Acanthus montanus		EOL	6928292	title
Acanthaceae	Acanthus	Acanthus spinosus		EOL	483779	title
Myrtaceae	Acca	Acca sellowiana		EOL	2508674	title
Sapindaceae	Acer	Acer barbinerve		COL	20255584	accepted name
Sapindaceae	Acer	Acer buergerianum		COL	20255586	accepted name
Sapindaceae	Acer	Acer campestre		COL	20255602	accepted name
Sapindaceae	Acer	Acer capillipes		COL	20255605	accepted name
Sapindaceae	Acer	Acer cappadocicum		COL	20255606	accepted name
Sapindaceae	Acer	Acer cappadocicum subsp. lobelii		COL	20255609	accepted name
Sapindaceae	Acer	Acer carpinifolium		COL	20255614	accepted name
Sapindaceae	Acer	Acer circinatum		COL	20255624	accepted name
Sapindaceae	Acer	Acer cissifolium		COL	20255625	accepted name
Sapindaceae	Acer	Acer davidii		COL	20255634	accepted name
Sapindaceae	Acer	Acer distylum		COL	20255639	accepted name
Sapindaceae	Acer	Acer erianthum		COL	20255642	accepted name
Sapindaceae	Acer	Acer glabrum		COL	20255651	accepted name
Sapindaceae	Acer	Acer granatense		COL	20255658	accepted name
Sapindaceae	Acer	Acer griseum		COL	20255663	accepted name
Sapindaceae	Acer	Acer heldreichii		COL	20255665	accepted name
Sapindaceae	Acer	Acer henryi		COL	20255670	accepted name
Sapindaceae	Acer	Acer hyrcanum		COL	20255672	accepted name
Sapindaceae	Acer	Acer japonicum		COL	20255679	accepted name
Sapindaceae	Acer	Acer laevigatum		COL	20255681	accepted name
Sapindaceae	Acer	Acer macrophyllum		COL	20255692	accepted name
Sapindaceae	Acer	Acer mandshuricum		COL	20255693	accepted name
Sapindaceae	Acer	Acer micranthum		COL	20255698	accepted name
Sapindaceae	Acer	Acer miyabei		COL	20255699	accepted name
Sapindaceae	Acer	Acer monspessulanum		COL	20255714	accepted name
Sapindaceae	Acer	Acer austriacum		COL	20255603	synonym
Sapindaceae	Acer	Acer negundo		COL	20255725	accepted name
Sapindaceae	Acer	Acer oblongum		COL	20255736	accepted name
Sapindaceae	Acer	Acer campestre subsp. campestre		COL	20255603	accepted name
Sapindaceae	Acer	Acer oliverianum		COL	20255753	accepted name
Sapindaceae	Acer	Acer diabolicum f. purpurascens		COL	20255637	synonym
Sapindaceae	Acer	Acer opalus		COL	20255756	accepted name
Sapindaceae	Acer	Acer palmatum		COL	20255758	accepted name
Sapindaceae	Acer	Acer grosseri		COL	20255636	synonym
Sapindaceae	Acer	Acer mono		COL	20255703	accepted name
Sapindaceae	Acer	Acer platanoides		COL	20255775	accepted name
Sapindaceae	Acer	Acer platanoides subsp. turkestanicum		COL	20255777	accepted name
Sapindaceae	Acer	Acer pseudoplatanus		COL	20255779	accepted name
Sapindaceae	Acer	Acer rubrum		COL	20255788	accepted name
Sapindaceae	Acer	Acer rufinerve		COL	20255791	accepted name
Sapindaceae	Acer	Acer saccharinum		COL	20255792	accepted name
Sapindaceae	Acer	Acer saccharum		COL	20255793	accepted name
Sapindaceae	Acer	Acer grandidentatum		COL	20255661	accepted name
Sapindaceae	Acer	Acer sempervirens		COL	20255798	accepted name
Sapindaceae	Acer	Acer shirasawanum		COL	20255802	accepted name
Sapindaceae	Acer	Acer sieboldianum		COL	20255804	accepted name
Sapindaceae	Acer	Acer spicatum		COL	20255810	accepted name
Sapindaceae	Acer	Acer ibericum		COL	20255718	synonym
Sapindaceae	Acer	Acer tataricum		COL	20255819	accepted name
Sapindaceae	Acer	Acer tataricum subsp. ginnala		COL	20255822	accepted name
Sapindaceae	Acer	Acer tegmentosum		COL	20255825	accepted name
Sapindaceae	Acer	Acer truncatum		COL	20255841	accepted name
Sapindaceae	Acer	Acer laxiflorum		COL	20255767	synonym
Sapindaceae	Acer	Acer velutinum		COL	20255848	accepted name
Sapindaceae	Acer	Acer maximowiczianum		COL	20255734	synonym
Sapindaceae	Acer	Acer obtusifolium subsp. syriacum		COL	20255749	synonym
Sapindaceae	Acer	Acer opalus subsp. obtusatum		COL	20255745	synonym
Sapindaceae	Acer	Acer semenovii		COL	20255823	synonym
Sapindaceae	Acer	Acer trautvetteri		COL	20255669	synonym
Sapindaceae	Acer	Acer barbinerve		EOL	2888943	title
Sapindaceae	Acer	Acer buergerianum		EOL	2888944	title
Sapindaceae	Acer	Acer campestre		EOL	582248	title
Sapindaceae	Acer	Acer capillipes		EOL	5612600	title
Sapindaceae	Acer	Acer cappadocicum		EOL	2888947	title
Sapindaceae	Acer	Acer carpinifolium		EOL	2864721	title
Sapindaceae	Acer	Acer circinatum		EOL	582251	title
Sapindaceae	Acer	Acer cissifolium		EOL	5612651	title
Sapindaceae	Acer	Acer davidii		EOL	2888958	title
Sapindaceae	Acer	Acer distylum		EOL	5612695	title
Sapindaceae	Acer	Acer erianthum		EOL	2888960	title
Sapindaceae	Acer	Acer glabrum		EOL	582249	title
Sapindaceae	Acer	Acer granatense		EOL	5612746	title
Sapindaceae	Acer	Acer griseum		EOL	2888966	title
Sapindaceae	Acer	Acer grosseri		EOL	5612681	content
Sapindaceae	Acer	Acer heldreichii		EOL	5612760	title
Sapindaceae	Acer	Acer trautvetteri		EOL	2880112	title
Sapindaceae	Acer	Acer henryi		EOL	2888967	title
Sapindaceae	Acer	Acer hyrcanum		EOL	5612788	title
Sapindaceae	Acer	Acer japonicum		EOL	2888970	title
Sapindaceae	Acer	Acer laevigatum		EOL	2888976	title
Sapindaceae	Acer	Acer macrophyllum		EOL	582252	title
Sapindaceae	Acer	Acer mandshuricum		EOL	2888983	title
Sapindaceae	Acer	Acer maximowiczianum		EOL	2888989	title
Sapindaceae	Acer	Acer micranthum		EOL	5612914	title
Sapindaceae	Acer	Acer miyabei		EOL	2943643	title
Sapindaceae	Acer	Acer monspessulanum		EOL	0	Ambiguous
Sapindaceae	Acer	Acer ibericum		EOL	5612791	title
Sapindaceae	Acer	Acer negundo		EOL	583069	title
Sapindaceae	Acer	Acer oblongum		EOL	2888990	title
Sapindaceae	Acer	Acer oliverianum		EOL	2888992	title
Sapindaceae	Acer	Acer opalus subsp. obtusatum		EOL	5612976	title
Sapindaceae	Acer	Acer opalus		EOL	5612984	title
Sapindaceae	Acer	Acer palmatum		EOL	596824	title
Sapindaceae	Acer	Acer laxiflorum		EOL	2888977	title
Sapindaceae	Acer	Acer pennsylvanicum		EOL	5613050	title
Sapindaceae	Acer	Acer mono		EOL	5612923	content
Sapindaceae	Acer	Acer platanoides		EOL	583070	title
Sapindaceae	Acer	Acer pseudoplatanus		EOL	583073	title
Sapindaceae	Acer	Acer pseudo-sieboldianum		EOL	2889001	content
Sapindaceae	Acer	Acer rubrum		EOL	582246	title
Sapindaceae	Acer	Acer rufinerve		EOL	5613133	title
Sapindaceae	Acer	Acer saccharinum		EOL	583072	title
Sapindaceae	Acer	Acer saccharum		EOL	582247	title
Sapindaceae	Acer	Acer grandidentatum		EOL	583022	title
Sapindaceae	Acer	Acer sempervirens		EOL	5613151	title
Sapindaceae	Acer	Acer shirasawanum		EOL	5613162	title
Sapindaceae	Acer	Acer sieboldianum		EOL	5613165	title
Sapindaceae	Acer	Acer spicatum		EOL	595760	title
Sapindaceae	Acer	Acer semenovii		EOL	2889004	title
Sapindaceae	Acer	Acer tataricum		EOL	596823	title
Sapindaceae	Acer	Acer tataricum subsp. ginnala		EOL	582250	content
Sapindaceae	Acer	Acer tegmentosum		EOL	2889014	title
Sapindaceae	Acer	Acer truncatum		EOL	2889020	title
Sapindaceae	Acer	Acer velutinum		EOL	5613274	title
Sapindaceae	Acer	Acer negundo subsp. californicum	Acer negundo var. californicum	COL	20255728	accepted name
Sapindaceae	Acer	Acer pennsylvanicum	Acer pensylvanicum	COL	20255770	accepted name
Sapindaceae	Acer	Acer pseudo-sieboldianum	Acer pseudosieboldianum	COL	20255780	accepted name
Sapindaceae	Acer	Acer aizuense	Acer taipuense	COL	20255818	accepted name
Sapindaceae	Acer	Acer austriacum	NA	EOL	5612561	title
Sapindaceae	Acer	Acer grosseri var. hersii	NA	EOL	42013053	title
Sapindaceae	Acer	Acer negundo subsp. californicum	NA	EOL	1283656	content
Sapindaceae	Acer	Acer campestre subsp. campestre	NA	EOL	27738892	content
Compositae	Achillea	Achillea abrotanoides		COL	17820956	provisionally accepted name
Compositae	Achillea	Achillea aegyptiaca		COL	17795572	provisionally accepted name
Compositae	Achillea	Achillea ageratifolia		COL	17805455	provisionally accepted name
Compositae	Achillea	Achillea ageratum		COL	17817073	provisionally accepted name
Compositae	Achillea	Achillea alpina subsp. pulchra		COL	17826202	provisionally accepted name
Compositae	Achillea	Achillea asiatica		COL	17798611	provisionally accepted name
Compositae	Achillea	Achillea atrata		COL	17793600	provisionally accepted name
Compositae	Achillea	Achillea barrelieri subsp. barrelieri		COL	17824622	provisionally accepted name
Compositae	Achillea	Achillea biserrata		COL	17794591	provisionally accepted name
Compositae	Achillea	Achillea chrysocoma		COL	17815140	provisionally accepted name
Compositae	Achillea	Achillea clavennae		COL	17810939	provisionally accepted name
Compositae	Achillea	Achillea clusiana		COL	17800891	provisionally accepted name
Compositae	Achillea	Achillea collina		COL	17796905	provisionally accepted name
Compositae	Achillea	Achillea crithmifolia		COL	0	Ambiguous (2)
Compositae	Achillea	Achillea erba-rotta subsp. moschata		COL	17828655	provisionally accepted name
Compositae	Achillea	Achillea erba-rotta		COL	17802385	provisionally accepted name
Compositae	Achillea	Achillea filipendulina		COL	17820402	provisionally accepted name
Compositae	Achillea	Achillea glaberrima		COL	17801976	provisionally accepted name
Compositae	Achillea	Achillea grandifolia		COL	17820937	provisionally accepted name
Compositae	Achillea	Achillea latiloba		COL	17795741	provisionally accepted name
Compositae	Achillea	Achillea ligustica		COL	17818017	provisionally accepted name
Compositae	Achillea	Achillea aurea		COL	17790577	synonym
Compositae	Achillea	Achillea macrophylla		COL	0	Ambiguous (2)
Compositae	Achillea	Achillea millefolium		COL	17820628	provisionally accepted name
Compositae	Achillea	Achillea nana		COL	0	Ambiguous (2)
Compositae	Achillea	Achillea nobilis		COL	17800257	provisionally accepted name
Compositae	Achillea	Achillea ochroleuca		COL	17808276	provisionally accepted name
Compositae	Achillea	Achillea odorata		COL	0	Ambiguous (2)
Compositae	Achillea	Achillea barrelieri subsp. oxyloba		COL	17799849	synonym
Compositae	Achillea	Achillea ptarmica		COL	17818329	provisionally accepted name
Compositae	Achillea	Achillea distans		COL	17812261	synonym
Compositae	Achillea	Achillea erba-rotta subsp. ambigua		COL	17802385	synonym
Compositae	Achillea	Achillea grandiflora		COL	17818521	synonym
Compositae	Achillea	Achillea setacea		COL	17809269	provisionally accepted name
Compositae	Achillea	Achillea taygetea		COL	17805469	provisionally accepted name
Compositae	Achillea	Achillea tenuifolia		COL	17807172	provisionally accepted name
Compositae	Achillea	Achillea thracica		COL	17816311	provisionally accepted name
Compositae	Achillea	Achillea tomentosa		COL	0	Ambiguous (2)
Compositae	Achillea	Achillea umbellata		COL	0	Ambiguous (2)
Compositae	Achillea	Achillea vermicularis		COL	17799647	provisionally accepted name
Compositae	Achillea	Achillea lingulata		COL	17794557	synonym
Compositae	Achillea	Achillea pannonica		COL	17813109	synonym
Compositae	Achillea	Achillea pyrenaica		COL	17801029	synonym
Compositae	Achillea	Achillea serbica		COL	17830114	synonym
Compositae	Achillea	Achillea sibirica		COL	17818303	synonym
Compositae	Achillea	Achillea sibirica var. camtschatica		COL	17826203	synonym
Compositae	Achillea	Achillea abrotanoides		EOL	6172802	title
Compositae	Achillea	Achillea aegyptiaca		EOL	6172808	title
Compositae	Achillea	Achillea ageratifolia		EOL	482138	title
Compositae	Achillea	Achillea ageratum		EOL	481979	title
Compositae	Achillea	Achillea sibirica var. camtschatica		EOL	6172689	content
Compositae	Achillea	Achillea sibirica		EOL	469677	content
Compositae	Achillea	Achillea asiatica		EOL	6172837	title
Compositae	Achillea	Achillea asplenifolia		EOL	6172840	content
Compositae	Achillea	Achillea atrata		EOL	6172843	title
Compositae	Achillea	Achillea biserrata		EOL	6172872	title
Compositae	Achillea	Achillea chrysocoma		EOL	6172904	title
Compositae	Achillea	Achillea clavennae		EOL	6172909	title
Compositae	Achillea	Achillea clusiana		EOL	6172914	title
Compositae	Achillea	Achillea clypeolata		EOL	6172916	title
Compositae	Achillea	Achillea collina		EOL	6172918	title
Compositae	Achillea	Achillea crithmifolia		EOL	6172935	title
Compositae	Achillea	Achillea distans		EOL	483362	title
Compositae	Achillea	Achillea erba-rotta		EOL	6172969	title
Compositae	Achillea	Achillea filipendulina		EOL	578297	title
Compositae	Achillea	Achillea grandifolia		EOL	6173015	title
Compositae	Achillea	Achillea latiloba		EOL	6173063	title
Compositae	Achillea	Achillea ligustica		EOL	597492	title
Compositae	Achillea	Achillea lingulata		EOL	6173072	title
Compositae	Achillea	Achillea macrophylla		EOL	0	Ambiguous
Compositae	Achillea	Achillea millefolium		EOL	467225	title
Compositae	Achillea	Achillea nana		EOL	6173130	title
Compositae	Achillea	Achillea nobilis		EOL	509736	title
Compositae	Achillea	Achillea ochroleuca		EOL	6173138	title
Compositae	Achillea	Achillea odorata		EOL	6173140	title
Compositae	Achillea	Achillea ptarmica		EOL	467230	title
Compositae	Achillea	Achillea pyrenaica		EOL	6173192	title
Compositae	Achillea	Achillea pannonica		EOL	6173156	content
Compositae	Achillea	Achillea setacea		EOL	2895801	title
Compositae	Achillea	Achillea tenuifolia		EOL	6173283	title
Compositae	Achillea	Achillea tomentosa		EOL	11260586	title
Compositae	Achillea	Achillea umbellata		EOL	6173296	title
Compositae	Achillea	Achillea vermicularis		EOL	6173305	title
Compositae	Achillea	Achillea asplenifolia	Achillea aspleniifolia	COL	17801111	provisionally accepted name
Compositae	Achillea	Achillea serbica	NA	EOL	6173234	title
Compositae	Achillea	Achillea alpina subsp. pulchra	NA	EOL	31061257	title
Compositae	Achillea	Achillea barrelieri subsp. barrelieri	NA	EOL	31061197	title
Compositae	Achillea	Achillea erba-rotta subsp. ambigua	NA	EOL	6172970	title
Compositae	Achillea	Achillea erba-rotta subsp. moschata	NA	EOL	6172972	title
Compositae	Achillea	Achillea glaberrima	NA	EOL	6173008	title
Compositae	Achillea	Achillea barrelieri subsp. oxyloba	NA	EOL	6173146	content
Compositae	Achillea	Achillea grandiflora	NA	EOL	6173014	title
Compositae	Achillea	Achillea taygetea	NA	EOL	6173281	title
Compositae	Achillea	Achillea thomasiana	NA	EOL	40460020	title
Compositae	Achillea	Achillea thracica	NA	EOL	6173288	title
Compositae	Achillea	Achillea tenorii	NA	EOL	31061156	content
Compositae	Achillea	Achillea aurea	NA	EOL	6232164	content
Gesneriaceae	Achimenes	Achimenes coccinea		COL	11771314	synonym
Gesneriaceae	Achimenes	Achimenes coccinea		EOL	5643904	content
Poaceae	Achnatherum	Achnatherum calamagrostis		COL	19224172	accepted name
Poaceae	Achnatherum	Achnatherum calamagrostis		EOL	5801464	content
Poaceae	Achnatherum	Achnatherum pekinensis	Achnatherum pekinense	EOL	0	Ambiguous
Not Found	Achyrachaena	Achyrachaena mollis		COL	17792590	provisionally accepted name
Not Found	Achyrachaena	Achyrachaena mollis		EOL	468706	title
Amaranthaceae	Achyranthes	Achyranthes aspera		COL	16325471	accepted name
Amaranthaceae	Achyranthes	Achyranthes bidentata		COL	16325479	accepted name
Amaranthaceae	Achyranthes	Achyranthes aspera		EOL	585501	title
Amaranthaceae	Achyranthes	Achyranthes bidentata		EOL	585500	title
Calyceraceae	Acicarpha	Acicarpha tribuloides		COL	20333288	accepted name
Calyceraceae	Acicarpha	Acicarpha tribuloides		EOL	467229	title
Lamiaceae	Acinos	Acinos alpinus		COL	19273190	synonym
Lamiaceae	Acinos	Acinos alpinus subsp. meridionalis		COL	19273212	synonym
Lamiaceae	Acinos	Acinos arvensis		COL	19273125	synonym
Lamiaceae	Acinos	Acinos alpinus		EOL	5370030	content
Lamiaceae	Acinos	Acinos arvensis		EOL	589803	content
Lamiaceae	Acinos	Acinos alpinus subsp. meridionalis	NA	EOL	5371044	title
Apiaceae	Aciphylla	Aciphylla aurea		COL	9469280	accepted name
Apiaceae	Aciphylla	Aciphylla aurea		EOL	5046763	title
Compositae	Acmella	Acmella oleracea		COL	17821007	provisionally accepted name
Compositae	Acmella	Acmella oleracea		EOL	483969	title
Myrtaceae	Acmena	Acmena acuminatissima		EOL	2874583	content
Myrtaceae	Acmena	Acmena smithii		EOL	5453366	content
Arecaceae	Acoelorrhaphe	Acoelorrhaphe wrightii		COL	19069157	accepted name
Arecaceae	Acoelorrhaphe	Acoelorrhaphe wrightii		EOL	1127723	title
Apocynaceae	Acokanthera	Acokanthera oblongifolia		COL	20300994	accepted name
Apocynaceae	Acokanthera	Acokanthera oppositifolia		COL	20300995	accepted name
Apocynaceae	Acokanthera	Acokanthera oblongifolia		EOL	2885715	title
Apocynaceae	Acokanthera	Acokanthera oppositifolia		EOL	2898416	title
Ranunculaceae	Aconitum	Aconitum alboviolaceum		COL	20205568	accepted name
Ranunculaceae	Aconitum	Aconitum anthora		COL	20205580	accepted name
Ranunculaceae	Aconitum	Aconitum barbatum		COL	20205590	accepted name
Ranunculaceae	Aconitum	Aconitum chasmanthum		COL	20205622	accepted name
Ranunculaceae	Aconitum	Aconitum columbianum		COL	20205634	accepted name
Ranunculaceae	Aconitum	Aconitum decipiens		COL	20205645	accepted name
Ranunculaceae	Aconitum	Aconitum variegatum subsp. paniculatum		COL	20206093	accepted name
Ranunculaceae	Aconitum	Aconitum delphinifolium		COL	20205654	accepted name
Ranunculaceae	Aconitum	Aconitum ferox		COL	20205681	accepted name
Ranunculaceae	Aconitum	Aconitum firmum		COL	20205683	accepted name
Ranunculaceae	Aconitum	Aconitum fischeri		COL	20205691	accepted name
Ranunculaceae	Aconitum	Aconitum jaluense		COL	20205757	accepted name
Ranunculaceae	Aconitum	Aconitum japonicum		COL	20205764	accepted name
Ranunculaceae	Aconitum	Aconitum japonicum subsp. subcuneatum		COL	20205771	accepted name
Ranunculaceae	Aconitum	Aconitum krylovii		COL	20205804	accepted name
Ranunculaceae	Aconitum	Aconitum kusnezoffii		COL	20205806	accepted name
Ranunculaceae	Aconitum	Aconitum lycoctonum subsp. lasiostomum		COL	20205844	accepted name
Ranunculaceae	Aconitum	Aconitum leucostomum		COL	20205822	accepted name
Ranunculaceae	Aconitum	Aconitum loczyanum		COL	20205831	accepted name
Ranunculaceae	Aconitum	Aconitum napellus		COL	20205866	accepted name
Ranunculaceae	Aconitum	Aconitum napellus subsp. napellus		COL	20205867	accepted name
Ranunculaceae	Aconitum	Aconitum variegatum subsp. variegatum		COL	20206087	accepted name
Ranunculaceae	Aconitum	Aconitum napellus subsp. corsicum		COL	20205869	accepted name
Ranunculaceae	Aconitum	Aconitum nasutum		COL	0	Ambiguous (2)
Ranunculaceae	Aconitum	Aconitum orientale		COL	20205903	accepted name
Ranunculaceae	Aconitum	Aconitum sachalinense		COL	20205984	accepted name
Ranunculaceae	Aconitum	Aconitum sczukinii		COL	20205998	accepted name
Ranunculaceae	Aconitum	Aconitum autumnale		COL	0	Ambiguous (2)
Ranunculaceae	Aconitum	Aconitum umbrosum		COL	20206080	accepted name
Ranunculaceae	Aconitum	Aconitum uncinatum		COL	20206082	accepted name
Ranunculaceae	Aconitum	Aconitum variegatum		COL	20206086	accepted name
Ranunculaceae	Aconitum	Aconitum villosum		COL	20206096	accepted name
Ranunculaceae	Aconitum	Aconitum volubile		COL	20206103	accepted name
Ranunculaceae	Aconitum	Aconitum lycoctonum subsp. vulparia		COL	20205847	accepted name
Ranunculaceae	Aconitum	Aconitum callibotryon		COL	20205926	synonym
Ranunculaceae	Aconitum	Aconitum compactum		COL	20205879	synonym
Ranunculaceae	Aconitum	Aconitum metajaponicum		COL	20205766	synonym
Ranunculaceae	Aconitum	Aconitum moldavicum		COL	20205845	synonym
Ranunculaceae	Aconitum	Aconitum rogoviczii		COL	20205844	synonym
Ranunculaceae	Aconitum	Aconitum x platanifolium		COL	20205846	synonym
Ranunculaceae	Aconitum	Aconitum yezoense		COL	20205988	synonym
Ranunculaceae	Aconitum	Aconitum alboviolaceum		EOL	2873234	title
Ranunculaceae	Aconitum	Aconitum anthora		EOL	485247	title
Ranunculaceae	Aconitum	Aconitum barbatum		EOL	2873241	title
Ranunculaceae	Aconitum	Aconitum carmichaelii		EOL	485249	title
Ranunculaceae	Aconitum	Aconitum chasmanthum		EOL	2873256	title
Ranunculaceae	Aconitum	Aconitum columbianum		EOL	596593	title
Ranunculaceae	Aconitum	Aconitum decipiens		EOL	5519711	title
Ranunculaceae	Aconitum	Aconitum delphinifolium		EOL	596417	content
Ranunculaceae	Aconitum	Aconitum ferox		EOL	485250	title
Ranunculaceae	Aconitum	Aconitum firmum		EOL	5519788	title
Ranunculaceae	Aconitum	Aconitum fischeri		EOL	483452	title
Ranunculaceae	Aconitum	Aconitum jaluense		EOL	2873306	title
Ranunculaceae	Aconitum	Aconitum japonicum		EOL	5519925	title
Ranunculaceae	Aconitum	Aconitum japonicum subsp. subcuneatum		EOL	5519929	title
Ranunculaceae	Aconitum	Aconitum kusnezoffii		EOL	2873316	title
Ranunculaceae	Aconitum	Aconitum x platanifolium		EOL	5520210	title
Ranunculaceae	Aconitum	Aconitum leucostomum		EOL	2873321	title
Ranunculaceae	Aconitum	Aconitum moldavicum		EOL	5519894	title
Ranunculaceae	Aconitum	Aconitum napellus		EOL	596409	title
Ranunculaceae	Aconitum	Aconitum compactum		EOL	5519679	title
Ranunculaceae	Aconitum	Aconitum napellus subsp. napellus		EOL	33029194	content
Ranunculaceae	Aconitum	Aconitum nasutum		EOL	2880029	title
Ranunculaceae	Aconitum	Aconitum orientale		EOL	5520163	title
Ranunculaceae	Aconitum	Aconitum yezoense		EOL	5520310	content
Ranunculaceae	Aconitum	Aconitum sachalinense		EOL	5520307	title
Ranunculaceae	Aconitum	Aconitum sczukinii		EOL	2873381	title
Ranunculaceae	Aconitum	Aconitum umbrosum		EOL	2873409	title
Ranunculaceae	Aconitum	Aconitum uncinatum		EOL	596963	title
Ranunculaceae	Aconitum	Aconitum variegatum		EOL	596728	title
Ranunculaceae	Aconitum	Aconitum villosum		EOL	2873411	title
Ranunculaceae	Aconitum	Aconitum volubile		EOL	2873413	title
Ranunculaceae	Aconitum	Aconitum lycoctonum subsp. vulparia		EOL	485251	title
Ranunculaceae	Aconitum	Aconitum carmichaelii	Aconitum carmichaeli	COL	20205614	accepted name
Ranunculaceae	Aconitum	Aconitum lycoctonum subsp. lasiostonum	Aconitum lycoctonum subsp. lasiostomum	COL	20205844	accepted name
Ranunculaceae	Aconitum	Aconitum variegatum subsp. paniculatum	NA	EOL	5519450	content
Ranunculaceae	Aconitum	Aconitum krylovii	NA	EOL	5519980	title
Ranunculaceae	Aconitum	Aconitum rogoviczii	NA	EOL	5520299	title
Ranunculaceae	Aconitum	Aconitum metajaponicum	NA	EOL	5520076	title
Ranunculaceae	Aconitum	Aconitum variegatum subsp. variegatum	NA	EOL	40518370	title
Ranunculaceae	Aconitum	Aconitum napellus subsp. corsicum	NA	EOL	27738886	title
Ranunculaceae	Aconitum	Aconitum callibotryon	NA	EOL	5519636	content
Polygonaceae	Aconogonon	Aconogonon divaricatum		COL	20274555	accepted name
Polygonaceae	Aconogonon	Aconogonon alpinum		COL	20274226	accepted name
Polygonaceae	Aconogonon	Aconogonon weyrichii		COL	20274591	accepted name
Polygonaceae	Aconogonon	Aconogonon divaricatum		EOL	2872836	content
Polygonaceae	Aconogonon	Aconogonon alpinum		EOL	585388	title
Polygonaceae	Aconogonon	Aconogonon weyrichii		EOL	6155982	content
Acoraceae	Acorus	Acorus calamus		COL	19084305	accepted name
Acoraceae	Acorus	Acorus gramineus		COL	19086258	accepted name
Acoraceae	Acorus	Acorus calamus		EOL	1123481	title
Acoraceae	Acorus	Acorus gramineus		EOL	1123091	title
Rutaceae	Acronychia	Acronychia pedunculata		COL	20257838	accepted name
Rutaceae	Acronychia	Acronychia pedunculata		EOL	2888502	title
Pteridaceae	Acrostichum	Acrostichum aureum		COL	20132059	accepted name
Pteridaceae	Acrostichum	Acrostichum aureum		EOL	597691	title
Ranunculaceae	Actaea	Actaea asiatica		COL	20205278	accepted name
Ranunculaceae	Actaea	Actaea europaea		COL	20204944	accepted name
Ranunculaceae	Actaea	Actaea japonica		COL	20204947	accepted name
Ranunculaceae	Actaea	Actaea pachypoda		COL	20204953	accepted name
Ranunculaceae	Actaea	Actaea podocarpa		COL	20204954	accepted name
Ranunculaceae	Actaea	Actaea racemosa		COL	20204956	accepted name
Ranunculaceae	Actaea	Actaea rubra		COL	20204959	accepted name
Ranunculaceae	Actaea	Actaea spicata		COL	20204963	accepted name
Ranunculaceae	Actaea	Actaea pachypoda f. rubrocarpa		COL	20204953	synonym
Ranunculaceae	Actaea	Actaea rubra f. neglecta		COL	20204960	synonym
Ranunculaceae	Actaea	Actaea asiatica		EOL	2873424	title
Ranunculaceae	Actaea	Actaea europaea		EOL	5528726	title
Ranunculaceae	Actaea	Actaea japonica		EOL	2903661	content
Ranunculaceae	Actaea	Actaea pachypoda		EOL	595010	title
Ranunculaceae	Actaea	Actaea podocarpa		EOL	594790	title
Ranunculaceae	Actaea	Actaea racemosa		EOL	594589	title
Ranunculaceae	Actaea	Actaea rubra		EOL	594656	title
Ranunculaceae	Actaea	Actaea spicata		EOL	596415	title
Phyllanthaceae	Actephila	Actephila javanica		COL	19124796	synonym
Phyllanthaceae	Actephila	Actephila javanica	NA	EOL	45044261	title
Actinidiaceae	Actinidia	Actinidia arguta		COL	20290809	accepted name
Actinidiaceae	Actinidia	Actinidia chinensis		COL	20290850	accepted name
Actinidiaceae	Actinidia	Actinidia melanandra		COL	20290887	accepted name
Actinidiaceae	Actinidia	Actinidia polygama		COL	20290894	accepted name
Actinidiaceae	Actinidia	Actinidia purpurea		COL	20290809	synonym
Actinidiaceae	Actinidia	Actinidia arguta		EOL	392750	title
Actinidiaceae	Actinidia	Actinidia chinensis		EOL	392751	title
Actinidiaceae	Actinidia	Actinidia melanandra		EOL	2889594	title
Actinidiaceae	Actinidia	Actinidia polygama		EOL	392752	title
Actinidiaceae	Actinidia	Actinidia kolomicta	Actinidia kolomikta	COL	20290876	accepted name
Actinidiaceae	Actinidia	Actinidia purpurea	NA	EOL	5706107	content
Actinidiaceae	Actinidia	Actinidia kolomicta	Actinidia kolomikta	EOL	231266	content
Pteridaceae	Actiniopteris	Actiniopteris semiflabellata		COL	20132563	accepted name
Pteridaceae	Actiniopteris	Actiniopteris semiflabellata		EOL	6358845	title
Lauraceae	Actinodaphne	Actinodaphne angustifolia		COL	20202028	accepted name
Lauraceae	Actinodaphne	Actinodaphne angustifolia		EOL	5399944	title
Arecaceae	Actinorhytis	Actinorhytis calapparia		COL	19133593	accepted name
Arecaceae	Actinorhytis	Actinorhytis calapparia		EOL	1000950	title
Malvaceae	Adansonia	Adansonia digitata		COL	20267092	accepted name
Malvaceae	Adansonia	Adansonia digitata		EOL	584789	title
Leguminosae	Adenanthera	Adenanthera pavonina		COL	11468079	accepted name
Leguminosae	Adenanthera	Adenanthera pavonina		EOL	646813	title
Apocynaceae	Adenium	Adenium obesum		COL	20301053	accepted name
Apocynaceae	Adenium	Adenium obesum		EOL	5328452	title
Bignoniaceae	Adenocalymma	Adenocalymma splendens		COL	20316825	synonym
Leguminosae	Adenocarpus	Adenocarpus decorticans		COL	11472036	accepted name
Leguminosae	Adenocarpus	Adenocarpus foliolosus		COL	11479845	accepted name
Leguminosae	Adenocarpus	Adenocarpus decorticans		EOL	703475	title
Leguminosae	Adenocarpus	Adenocarpus foliolosus		EOL	643425	title
Compositae	Adenocaulon	Adenocaulon chilense		COL	17799437	provisionally accepted name
Compositae	Adenocaulon	Adenocaulon chilense		EOL	6236808	title
Campanulaceae	Adenophora	Adenophora khasiana		COL	19206405	accepted name
Campanulaceae	Adenophora	Adenophora koreana		COL	19206406	accepted name
Campanulaceae	Adenophora	Adenophora liliifolia		COL	19206422	accepted name
Campanulaceae	Adenophora	Adenophora nikoensis		COL	19206461	accepted name
Campanulaceae	Adenophora	Adenophora pereskiifolia		COL	19206498	accepted name
Campanulaceae	Adenophora	Adenophora stenanthina		COL	19206605	accepted name
Campanulaceae	Adenophora	Adenophora stricta		COL	19206613	accepted name
Campanulaceae	Adenophora	Adenophora confusa		COL	19206615	synonym
Campanulaceae	Adenophora	Adenophora kurilensis		COL	19206660	synonym
Campanulaceae	Adenophora	Adenophora triphylla var. japonica		COL	19206660	synonym
Campanulaceae	Adenophora	Adenophora khasiana		EOL	5133278	title
Campanulaceae	Adenophora	Adenophora liliifolia		EOL	5135596	title
Campanulaceae	Adenophora	Adenophora pereskiifolia		EOL	5135697	title
Campanulaceae	Adenophora	Adenophora stenanthina		EOL	5135746	title
Campanulaceae	Adenophora	Adenophora stricta		EOL	5135753	title
Campanulaceae	Adenophora	Adenophora confusa		EOL	5135754	content
Campanulaceae	Adenophora	Adenophora taquetii		EOL	5135764	title
Campanulaceae	Adenophora	Adenophora triphylla var. japonica		EOL	0	Ambiguous
Campanulaceae	Adenophora	Adenophora koreana	NA	EOL	5135650	title
Campanulaceae	Adenophora	Adenophora nikoensis	NA	EOL	5135679	title
Campanulaceae	Adenophora	Adenophora kurilensis	NA	EOL	5135770	content
Rosaceae	Adenorachis	Adenorachis arbutifolia		COL	20241304	synonym
Rosaceae	Adenorachis	Adenorachis arbutifolia	NA	EOL	301303	title
Compositae	Adenostyles	Adenostyles alliariae		COL	17822655	provisionally accepted name
Compositae	Adenostyles	Adenostyles australis		COL	17824336	synonym
Compositae	Adenostyles	Adenostyles glabra		COL	17822178	synonym
Compositae	Adenostyles	Adenostyles alliariae		EOL	6262232	title
Compositae	Adenostyles	Adenostyles glabra		EOL	0	Ambiguous
Compositae	Adenostyles	Adenostyles australis	NA	EOL	6262239	title
Pteridaceae	Adiantum	Adiantum amplum		COL	20133318	accepted name
Pteridaceae	Adiantum	Adiantum formosum		COL	20133514	accepted name
Pteridaceae	Adiantum	Adiantum capillus-veneris		COL	20133339	accepted name
Pteridaceae	Adiantum	Adiantum caudatum		COL	20133344	accepted name
Pteridaceae	Adiantum	Adiantum concinnum		COL	20133352	accepted name
Pteridaceae	Adiantum	Adiantum cunninghamii		COL	20133357	accepted name
Pteridaceae	Adiantum	Adiantum diaphanum		COL	20133367	accepted name
Pteridaceae	Adiantum	Adiantum hispidulum		COL	20133661	accepted name
Pteridaceae	Adiantum	Adiantum jordanii		COL	20133675	accepted name
Pteridaceae	Adiantum	Adiantum macrophyllum		COL	20133691	accepted name
Pteridaceae	Adiantum	Adiantum pedatum		COL	20133730	accepted name
Pteridaceae	Adiantum	Adiantum peruvianum		COL	20133734	accepted name
Pteridaceae	Adiantum	Adiantum polyphyllum		COL	20133746	accepted name
Pteridaceae	Adiantum	Adiantum raddianum		COL	20133755	accepted name
Pteridaceae	Adiantum	Adiantum subcordatum		COL	20133792	accepted name
Pteridaceae	Adiantum	Adiantum tenerum		COL	20133796	accepted name
Pteridaceae	Adiantum	Adiantum tetraphyllum		COL	20133801	accepted name
Pteridaceae	Adiantum	Adiantum trapeziforme		COL	20133808	accepted name
Pteridaceae	Adiantum	Adiantum venustum		COL	20133816	accepted name
Pteridaceae	Adiantum	Adiantum affine		COL	0	Ambiguous (4)
Pteridaceae	Adiantum	Adiantum amplum		EOL	6121926	content
Pteridaceae	Adiantum	Adiantum formosum		EOL	6122127	title
Pteridaceae	Adiantum	Adiantum capillus-veneris		EOL	597687	title
Pteridaceae	Adiantum	Adiantum caudatum		EOL	596889	title
Pteridaceae	Adiantum	Adiantum concinnum		EOL	597681	title
Pteridaceae	Adiantum	Adiantum cunninghamii		EOL	6122035	title
Pteridaceae	Adiantum	Adiantum diaphanum		EOL	6121913	title
Pteridaceae	Adiantum	Adiantum hispidulum		EOL	597671	title
Pteridaceae	Adiantum	Adiantum jordanii		EOL	597684	title
Pteridaceae	Adiantum	Adiantum macrophyllum		EOL	597677	title
Pteridaceae	Adiantum	Adiantum pedatum		EOL	597685	title
Pteridaceae	Adiantum	Adiantum peruvianum		EOL	6122365	title
Pteridaceae	Adiantum	Adiantum polyphyllum		EOL	6122385	title
Pteridaceae	Adiantum	Adiantum raddianum		EOL	597669	title
Pteridaceae	Adiantum	Adiantum subcordatum		EOL	6122495	title
Pteridaceae	Adiantum	Adiantum tenerum		EOL	597686	title
Pteridaceae	Adiantum	Adiantum tetraphyllum		EOL	597672	title
Pteridaceae	Adiantum	Adiantum trapeziforme		EOL	0	Ambiguous
Pteridaceae	Adiantum	Adiantum venustum		EOL	6122560	title
Pteridaceae	Adiantum	Adiantum reniforme var. reniforme	Adiantum reniforme subsp. reniforme	COL	20133760	accepted name
Pteridaceae	Adiantum	Adiantum affine	NA	EOL	6121913	content
Papaveraceae	Adlumia	Adlumia fungosa		COL	20210227	accepted name
Papaveraceae	Adlumia	Adlumia fungosa		EOL	594988	title
Not Found	Adonidia	Adonidia merrillii		COL	19179177	accepted name
Not Found	Adonidia	Adonidia merrillii		EOL	1089464	title
Ranunculaceae	Adonis	Adonis aestivalis		COL	20206849	accepted name
Ranunculaceae	Adonis	Adonis annua		COL	20206859	accepted name
Ranunculaceae	Adonis	Adonis flammea		COL	20206878	accepted name
Ranunculaceae	Adonis	Adonis pyrenaica		COL	20206887	accepted name
Ranunculaceae	Adonis	Adonis vernalis		COL	20206897	accepted name
Ranunculaceae	Adonis	Adonis volgensis		COL	20206899	accepted name
Ranunculaceae	Adonis	Adonis brevistyla		COL	20206871	synonym
Ranunculaceae	Adonis	Adonis aestivalis		EOL	594858	title
Ranunculaceae	Adonis	Adonis annua		EOL	595628	title
Ranunculaceae	Adonis	Adonis annua subsp. annua		EOL	5519382	title
Ranunculaceae	Adonis	Adonis chrysocyathus		EOL	2903528	title
Ranunculaceae	Adonis	Adonis brevistyla		EOL	2873430	content
Ranunculaceae	Adonis	Adonis flammea		EOL	5519297	title
Ranunculaceae	Adonis	Adonis vernalis		EOL	595629	title
Ranunculaceae	Adonis	Adonis chrysocyathus	Adonis chrysocyatha	COL	20206866	accepted name
Ranunculaceae	Adonis	Adonis pyrenaica	NA	EOL	2903528	content
Adoxaceae	Adoxa	Adoxa moschatellina		COL	20334589	accepted name
Adoxaceae	Adoxa	Adoxa moschatellina		EOL	488744	title
Bromeliaceae	Aechmea	Aechmea angustifolia		COL	19071402	accepted name
Bromeliaceae	Aechmea	Aechmea bracteata		COL	19071442	accepted name
Bromeliaceae	Aechmea	Aechmea calyculata		COL	19071462	accepted name
Bromeliaceae	Aechmea	Aechmea candida		COL	19071465	accepted name
Bromeliaceae	Aechmea	Aechmea cariocae		COL	19071468	accepted name
Bromeliaceae	Aechmea	Aechmea coelestis		COL	19071487	accepted name
Bromeliaceae	Aechmea	Aechmea comata		COL	19071495	accepted name
Bromeliaceae	Aechmea	Aechmea dactylina		COL	19071521	accepted name
Bromeliaceae	Aechmea	Aechmea fasciata		COL	19071569	accepted name
Bromeliaceae	Aechmea	Aechmea filicaulis		COL	19071576	accepted name
Bromeliaceae	Aechmea	Aechmea fulgens		COL	19071591	accepted name
Bromeliaceae	Aechmea	Aechmea gigantea		COL	19071605	accepted name
Bromeliaceae	Aechmea	Aechmea mariae-reginae		COL	19071707	accepted name
Bromeliaceae	Aechmea	Aechmea nudicaulis var. nudicaulis		COL	19071759	accepted name
Bromeliaceae	Aechmea	Aechmea recurvata		COL	19071844	accepted name
Bromeliaceae	Aechmea	Aechmea sphaerocephala		COL	19071890	accepted name
Bromeliaceae	Aechmea	Aechmea veitchii		COL	19071933	accepted name
Bromeliaceae	Aechmea	Aechmea weberbaueri		COL	19071944	accepted name
Bromeliaceae	Aechmea	Aechmea weilbachii		COL	19071947	accepted name
Bromeliaceae	Aechmea	Aechmea conspicuiarmata		COL	19221581	synonym
Bromeliaceae	Aechmea	Aechmea lagenaria		COL	19071661	synonym
Bromeliaceae	Aechmea	Aechmea megalantha		COL	19071506	synonym
Bromeliaceae	Aechmea	Aechmea angustifolia		EOL	1127288	title
Bromeliaceae	Aechmea	Aechmea bracteata		EOL	1127270	title
Bromeliaceae	Aechmea	Aechmea calyculata		EOL	1127262	title
Bromeliaceae	Aechmea	Aechmea candida		EOL	1127259	title
Bromeliaceae	Aechmea	Aechmea cariocae		EOL	1127257	title
Bromeliaceae	Aechmea	Aechmea coelestis		EOL	1127249	title
Bromeliaceae	Aechmea	Aechmea dactylina		EOL	1127235	title
Bromeliaceae	Aechmea	Aechmea fasciata		EOL	1127218	title
Bromeliaceae	Aechmea	Aechmea filicaulis		EOL	1127214	title
Bromeliaceae	Aechmea	Aechmea fulgens		EOL	1127205	title
Bromeliaceae	Aechmea	Aechmea mariae-reginae		EOL	1127158	title
Bromeliaceae	Aechmea	Aechmea nudicaulis var. nudicaulis		EOL	1292731	title
Bromeliaceae	Aechmea	Aechmea penduliflora		EOL	1127124	title
Bromeliaceae	Aechmea	Aechmea recurvata		EOL	1127104	title
Bromeliaceae	Aechmea	Aechmea sphaerocephala		EOL	1127086	title
Bromeliaceae	Aechmea	Aechmea veitchii		EOL	1127064	title
Bromeliaceae	Aechmea	Aechmea weilbachii		EOL	1127058	title
Bromeliaceae	Aechmea	Aechmea luddemanniana	Aechmea lueddemanniana	COL	19071691	accepted name
Bromeliaceae	Aechmea	Aechmea conspicuiarmata	NA	EOL	8783472	content
Bromeliaceae	Aechmea	Aechmea comata	NA	EOL	1127247	title
Bromeliaceae	Aechmea	Aechmea gigantea	NA	EOL	1127201	title
Bromeliaceae	Aechmea	Aechmea lagenaria	NA	EOL	1127180	content
Bromeliaceae	Aechmea	Aechmea luddemanniana	NA	EOL	5759480	title
Bromeliaceae	Aechmea	Aechmea megalantha	NA	EOL	1127155	content
Bromeliaceae	Aechmea	Aechmea weberbaueri	NA	EOL	1127060	title
Poaceae	Aegilops	Aegilops cylindrica		COL	19224572	accepted name
Poaceae	Aegilops	Aegilops geniculata		COL	19224612	accepted name
Poaceae	Aegilops	Aegilops speltoides		COL	19224742	accepted name
Poaceae	Aegilops	Aegilops tauschii		COL	19224783	accepted name
Poaceae	Aegilops	Aegilops triuncialis		COL	19224814	accepted name
Poaceae	Aegilops	Aegilops ventricosa		COL	19224892	accepted name
Poaceae	Aegilops	Aegilops cylindrica		EOL	1114004	title
Poaceae	Aegilops	Aegilops geniculata		EOL	1114006	title
Poaceae	Aegilops	Aegilops speltoides		EOL	1115624	title
Poaceae	Aegilops	Aegilops tauschii		EOL	1115236	title
Poaceae	Aegilops	Aegilops triuncialis		EOL	1114007	title
Poaceae	Aegilops	Aegilops ventricosa		EOL	1115626	title
Orobanchaceae	Aeginetia	Aeginetia indica		COL	20313553	accepted name
Orobanchaceae	Aeginetia	Aeginetia indica		EOL	590102	title
Rutaceae	Aegle	Aegle marmelos		COL	20260187	accepted name
Rutaceae	Aegle	Aegle marmelos		EOL	483583	title
Boraginaceae	Aegonychon	Aegonychon purpureocaeruleum	Aegonychon purpurocaeruleum	EOL	0	Ambiguous
Apiaceae	Aegopodium	Aegopodium podagraria		COL	9472356	accepted name
Apiaceae	Aegopodium	Aegopodium podagraria		EOL	581940	title
Crassulaceae	Aeonium	Aeonium arboreum var. rubrolineatum		COL	20216216	accepted name
Crassulaceae	Aeonium	Aeonium arboreum		COL	20216214	accepted name
Crassulaceae	Aeonium	Aeonium aureum		COL	20216219	accepted name
Crassulaceae	Aeonium	Aeonium canariense		COL	20216221	accepted name
Crassulaceae	Aeonium	Aeonium canariense var. palmense		COL	20216223	accepted name
Crassulaceae	Aeonium	Aeonium castello-paivae		COL	20216228	accepted name
Crassulaceae	Aeonium	Aeonium ciliatum		COL	20216229	accepted name
Crassulaceae	Aeonium	Aeonium decorum		COL	20216232	accepted name
Crassulaceae	Aeonium	Aeonium glandulosum		COL	20216237	accepted name
Crassulaceae	Aeonium	Aeonium glutinosum		COL	20216238	accepted name
Crassulaceae	Aeonium	Aeonium haworthii		COL	20216242	accepted name
Crassulaceae	Aeonium	Aeonium lindleyi		COL	20216246	accepted name
Crassulaceae	Aeonium	Aeonium percarneum		COL	20216250	accepted name
Crassulaceae	Aeonium	Aeonium saundersii		COL	20216251	accepted name
Crassulaceae	Aeonium	Aeonium sedifolium		COL	20216252	accepted name
Crassulaceae	Aeonium	Aeonium simsii		COL	20216253	accepted name
Crassulaceae	Aeonium	Aeonium spathulatum		COL	20216255	accepted name
Crassulaceae	Aeonium	Aeonium undulatum		COL	20216258	accepted name
Crassulaceae	Aeonium	Aeonium valverdense		COL	20216260	accepted name
Crassulaceae	Aeonium	Aeonium domesticum		COL	20215649	synonym
Crassulaceae	Aeonium	Aeonium tortuosum		COL	20215646	synonym
Crassulaceae	Aeonium	Aeonium viscatum		COL	20216248	synonym
Crassulaceae	Aeonium	Aeonium arboreum		EOL	483363	title
Crassulaceae	Aeonium	Aeonium aureum		EOL	5549971	content
Crassulaceae	Aeonium	Aeonium canariense		EOL	5549465	title
Crassulaceae	Aeonium	Aeonium castello-paivae		EOL	5549983	title
Crassulaceae	Aeonium	Aeonium ciliatum		EOL	5549985	title
Crassulaceae	Aeonium	Aeonium decorum		EOL	5549992	title
Crassulaceae	Aeonium	Aeonium glandulosum		EOL	5550002	title
Crassulaceae	Aeonium	Aeonium glutinosum		EOL	5550003	title
Crassulaceae	Aeonium	Aeonium haworthii		EOL	483365	title
Crassulaceae	Aeonium	Aeonium lindleyi		EOL	5550015	title
Crassulaceae	Aeonium	Aeonium viscatum		EOL	5550048	title
Crassulaceae	Aeonium	Aeonium percarneum		EOL	5550026	title
Crassulaceae	Aeonium	Aeonium saundersii		EOL	5550030	title
Crassulaceae	Aeonium	Aeonium sedifolium		EOL	5550031	title
Crassulaceae	Aeonium	Aeonium simsii		EOL	5550032	title
Crassulaceae	Aeonium	Aeonium spathulatum		EOL	5550034	title
Crassulaceae	Aeonium	Aeonium undulatum		EOL	5550041	title
Crassulaceae	Aeonium	Aeonium valverdense		EOL	5550044	title
Amaranthaceae	Aerva	Aerva scandens		COL	16326940	synonym
Amaranthaceae	Aerva	Aerva scandens	NA	EOL	5173082	title
Gesneriaceae	Aeschynanthus	Aeschynanthus parasiticus		COL	11770769	accepted name
Gesneriaceae	Aeschynanthus	Aeschynanthus speciosus		COL	11770110	accepted name
Gesneriaceae	Aeschynanthus	Aeschynanthus marmoratus		COL	11770639	synonym
Gesneriaceae	Aeschynanthus	Aeschynanthus marmoratus		EOL	2895214	content
Gesneriaceae	Aeschynanthus	Aeschynanthus parasiticus		EOL	2877456	title
Gesneriaceae	Aeschynanthus	Aeschynanthus speciosus		EOL	5645380	title
Sapindaceae	Aesculus	Aesculus californica		COL	20255861	accepted name
Sapindaceae	Aesculus	Aesculus flava		COL	20255864	accepted name
Sapindaceae	Aesculus	Aesculus glabra		COL	20255865	accepted name
Sapindaceae	Aesculus	Aesculus hippocastanum		COL	20255867	accepted name
Sapindaceae	Aesculus	Aesculus indica		COL	20255868	accepted name
Sapindaceae	Aesculus	Aesculus parviflora		COL	20255871	accepted name
Sapindaceae	Aesculus	Aesculus pavia		COL	20255872	accepted name
Sapindaceae	Aesculus	Aesculus turbinata		COL	20255875	accepted name
Sapindaceae	Aesculus	Aesculus californica		EOL	581628	title
Sapindaceae	Aesculus	Aesculus x carnea		EOL	482034	content
Sapindaceae	Aesculus	Aesculus flava		EOL	582235	title
Sapindaceae	Aesculus	Aesculus glabra		EOL	582241	title
Sapindaceae	Aesculus	Aesculus hippocastanum		EOL	582243	title
Sapindaceae	Aesculus	Aesculus indica		EOL	2905431	title
Sapindaceae	Aesculus	Aesculus parviflora		EOL	582242	title
Sapindaceae	Aesculus	Aesculus pavia		EOL	582244	title
Sapindaceae	Aesculus	Aesculus turbinata		EOL	483851	title
Sapindaceae	Aesculus	Aesculus x carnea	Aesculus carnea	COL	20255878	accepted name
Not Found	Aethephyllum	Aethephyllum pinnatifidum		COL	20280008	synonym
Not Found	Aethephyllum	Aethephyllum pinnatifidum		EOL	5166842	content
Brassicaceae	Aethionema	Aethionema armenum		COL	7145655	accepted name
Brassicaceae	Aethionema	Aethionema capitatum		COL	7141895	accepted name
Brassicaceae	Aethionema	Aethionema carneum		COL	7142117	accepted name
Brassicaceae	Aethionema	Aethionema coridifolium		COL	7142450	accepted name
Brassicaceae	Aethionema	Aethionema grandiflorum		COL	7143672	accepted name
Brassicaceae	Aethionema	Aethionema iberideum		COL	7144117	accepted name
Brassicaceae	Aethionema	Aethionema saxatile		COL	7145522	accepted name
Brassicaceae	Aethionema	Aethionema schistosum		COL	7145611	accepted name
Brassicaceae	Aethionema	Aethionema thomasianum		COL	7145733	accepted name
Brassicaceae	Aethionema	Aethionema oppositifolium		COL	7142692	synonym
Brassicaceae	Aethionema	Aethionema armenum		EOL	5154883	title
Brassicaceae	Aethionema	Aethionema capitatum		EOL	5154891	title
Brassicaceae	Aethionema	Aethionema carneum		EOL	2881782	title
Brassicaceae	Aethionema	Aethionema coridifolium		EOL	0	Ambiguous
Brassicaceae	Aethionema	Aethionema grandiflorum		EOL	5154921	title
Brassicaceae	Aethionema	Aethionema iberideum		EOL	5154927	title
Brassicaceae	Aethionema	Aethionema oppositifolium		EOL	0	Ambiguous
Brassicaceae	Aethionema	Aethionema saxatile		EOL	11258678	title
Brassicaceae	Aethionema	Aethionema schistosum	NA	EOL	27741509	title
Brassicaceae	Aethionema	Aethionema thomasianum	NA	EOL	5154983	title
Apiaceae	Aethusa	Aethusa cynapium		COL	9466922	accepted name
Apiaceae	Aethusa	Aethusa cynapium		EOL	584981	title
Zingiberaceae	Aframomum	Aframomum chrysanthum		COL	19071992	accepted name
Zingiberaceae	Aframomum	Aframomum melegueta		COL	19072035	accepted name
Zingiberaceae	Aframomum	Aframomum chrysanthum		EOL	1127037	title
Zingiberaceae	Aframomum	Aframomum melegueta		EOL	1127012	title
Podocarpaceae	Afrocarpus	Afrocarpus mannii		COL	18158357	accepted name
Podocarpaceae	Afrocarpus	Afrocarpus mannii		EOL	323477	title
Leguminosae	Afzelia	Afzelia quanzensis		COL	11468446	accepted name
Leguminosae	Afzelia	Afzelia xylocarpa		COL	11479464	accepted name
Leguminosae	Afzelia	Afzelia quanzensis		EOL	697126	title
Leguminosae	Afzelia	Afzelia xylocarpa		EOL	643880	title
Amaryllidaceae	Agapanthus	Agapanthus africanus		COL	19149520	accepted name
Amaryllidaceae	Agapanthus	Agapanthus campanulatus subsp. patens		COL	19149522	accepted name
Amaryllidaceae	Agapanthus	Agapanthus campanulatus		COL	19149521	accepted name
Amaryllidaceae	Agapanthus	Agapanthus praecox subsp. orientalis		COL	19149552	accepted name
Amaryllidaceae	Agapanthus	Agapanthus praecox		COL	19149550	accepted name
Amaryllidaceae	Agapanthus	Agapanthus africanus		EOL	1083810	title
Amaryllidaceae	Agapanthus	Agapanthus campanulatus subsp. patens		EOL	1290214	title
Amaryllidaceae	Agapanthus	Agapanthus campanulatus		EOL	1083811	title
Amaryllidaceae	Agapanthus	Agapanthus praecox subsp. orientalis		EOL	1290222	title
Amaryllidaceae	Agapanthus	Agapanthus praecox		EOL	1083816	title
Lamiaceae	Agastache	Agastache mexicana		COL	19285660	accepted name
Lamiaceae	Agastache	Agastache rugosa		COL	19288732	accepted name
Lamiaceae	Agastache	Agastache scrophulariifolia		COL	19288936	accepted name
Lamiaceae	Agastache	Agastache urticifolia		COL	19289251	accepted name
Lamiaceae	Agastache	Agastache mexicana		EOL	5362289	title
Lamiaceae	Agastache	Agastache rugosa		EOL	2893655	title
Lamiaceae	Agastache	Agastache scrophulariifolia		EOL	579803	title
Lamiaceae	Agastache	Agastache urticifolia		EOL	579806	title
Araucariaceae	Agathis	Agathis borneensis		COL	18158649	accepted name
Araucariaceae	Agathis	Agathis robusta		COL	18158512	accepted name
Araucariaceae	Agathis	Agathis borneensis		EOL	323471	title
Araucariaceae	Agathis	Agathis robusta		EOL	1033628	title
Asparagaceae	Agave	Agave americana subsp. americana		COL	19167595	accepted name
Asparagaceae	Agave	Agave attenuata		COL	19149628	accepted name
Asparagaceae	Agave	Agave deserti		COL	19149763	accepted name
Asparagaceae	Agave	Agave ellemeetiana		COL	19149795	accepted name
Asparagaceae	Agave	Agave filifera		COL	19149817	accepted name
Asparagaceae	Agave	Agave gigantensis		COL	19149847	accepted name
Asparagaceae	Agave	Agave macroacantha		COL	19149974	accepted name
Asparagaceae	Agave	Agave mitis var. mitis		COL	19167611	accepted name
Asparagaceae	Agave	Agave nizandensis		COL	19150041	accepted name
Asparagaceae	Agave	Agave ocahui		COL	19150048	accepted name
Asparagaceae	Agave	Agave parryi		COL	19150079	accepted name
Asparagaceae	Agave	Agave polianthiflora		COL	19150109	accepted name
Asparagaceae	Agave	Agave schottii		COL	19150201	accepted name
Asparagaceae	Agave	Agave titanota		COL	19150272	accepted name
Asparagaceae	Agave	Agave filifera subsp. schidigera		COL	19150195	synonym
Asparagaceae	Agave	Agave victoriae-reginae		COL	19150326	accepted name
Asparagaceae	Agave	Agave vivipara		COL	19150346	accepted name
Asparagaceae	Agave	Agave lophantha		COL	19150293	synonym
Asparagaceae	Agave	Agave mitis var. albicans		COL	19150015	synonym
Asparagaceae	Agave	Agave potatorum var. verschaffeltii		COL	19150118	synonym
Asparagaceae	Agave	Agave striata subsp. stricta		COL	19150251	synonym
Asparagaceae	Agave	Agave americana subsp. americana		EOL	1297092	title
Asparagaceae	Agave	Agave attenuata		EOL	1083839	title
Asparagaceae	Agave	Agave deserti		EOL	1083882	title
Asparagaceae	Agave	Agave ellemeetiana		EOL	1083890	title
Asparagaceae	Agave	Agave filifera		EOL	1083895	title
Asparagaceae	Agave	Agave gigantensis		EOL	1083904	title
Asparagaceae	Agave	Agave macroacantha		EOL	1083939	title
Asparagaceae	Agave	Agave mitis var. mitis		EOL	1290953	title
Asparagaceae	Agave	Agave mitis var. albicans		EOL	1290244	content
Asparagaceae	Agave	Agave nizandensis		EOL	1083958	title
Asparagaceae	Agave	Agave ocahui		EOL	1083961	title
Asparagaceae	Agave	Agave parryi		EOL	1083970	title
Asparagaceae	Agave	Agave polianthiflora		EOL	1083982	title
Asparagaceae	Agave	Agave potatorum var. verschaffeltii		EOL	1083984	content
Asparagaceae	Agave	Agave filifera subsp. schidigera		EOL	1083996	content
Asparagaceae	Agave	Agave schottii		EOL	1083999	title
Asparagaceae	Agave	Agave striata subsp. stricta		EOL	1084014	content
Asparagaceae	Agave	Agave titanota		EOL	1084023	title
Asparagaceae	Agave	Agave lophantha		EOL	1084030	content
Asparagaceae	Agave	Agave victoriae-reginae		EOL	1084036	title
Asparagaceae	Agave	Agave vivipara		EOL	1084040	title
Compositae	Ageratina	Ageratina adenophora		COL	17814817	provisionally accepted name
Compositae	Ageratina	Ageratina altissima		COL	17799060	provisionally accepted name
Compositae	Ageratina	Ageratina aromatica		COL	17812576	provisionally accepted name
Compositae	Ageratina	Ageratina adenophora		EOL	468514	title
Compositae	Ageratina	Ageratina altissima		EOL	468507	title
Compositae	Ageratina	Ageratina aromatica		EOL	468508	title
Compositae	Ageratum	Ageratum conyzoides		COL	17813275	provisionally accepted name
Compositae	Ageratum	Ageratum houstonianum		COL	17793341	provisionally accepted name
Compositae	Ageratum	Ageratum conyzoides		EOL	468159	title
Compositae	Ageratum	Ageratum houstonianum		EOL	468158	title
Meliaceae	Aglaia	Aglaia elliptica		COL	20260677	accepted name
Meliaceae	Aglaia	Aglaia elliptica		EOL	7208703	title
Polypodiaceae	Aglaomorpha	Aglaomorpha drynarioides		COL	20140622	accepted name
Polypodiaceae	Aglaomorpha	Aglaomorpha heraclea		COL	20140623	accepted name
Polypodiaceae	Aglaomorpha	Aglaomorpha meyeniana		COL	20140626	accepted name
Polypodiaceae	Aglaomorpha	Aglaomorpha novoguineensis		COL	20140628	accepted name
Polypodiaceae	Aglaomorpha	Aglaomorpha drynarioides		EOL	6117125	title
Polypodiaceae	Aglaomorpha	Aglaomorpha heraclea		EOL	6117126	title
Polypodiaceae	Aglaomorpha	Aglaomorpha leporella		EOL	42611845	content
Polypodiaceae	Aglaomorpha	Aglaomorpha meyeniana		EOL	6117131	title
Polypodiaceae	Aglaomorpha	Aglaomorpha novoguineensis		EOL	6117133	title
Araceae	Aglaonema	Aglaonema commutatum		COL	19297254	accepted name
Araceae	Aglaonema	Aglaonema commutatum var. warburgii		COL	19297872	accepted name
Araceae	Aglaonema	Aglaonema costatum		COL	19298045	accepted name
Araceae	Aglaonema	Aglaonema modestum		COL	19302122	accepted name
Araceae	Aglaonema	Aglaonema crispum		COL	19305847	synonym
Araceae	Aglaonema	Aglaonema siamense		COL	19306622	synonym
Araceae	Aglaonema	Aglaonema commutatum		EOL	1091912	title
Araceae	Aglaonema	Aglaonema commutatum var. warburgii		EOL	1291609	title
Araceae	Aglaonema	Aglaonema costatum		EOL	1091929	title
Araceae	Aglaonema	Aglaonema crispum		EOL	1091943	title
Araceae	Aglaonema	Aglaonema modestum		EOL	1091998	title
Araceae	Aglaonema	Aglaonema siamense		EOL	1092024	content
Compositae	Agoseris	Agoseris aurantiaca		COL	17820545	provisionally accepted name
Compositae	Agoseris	Agoseris glauca		COL	17819150	provisionally accepted name
Compositae	Agoseris	Agoseris aurantiaca		EOL	468155	title
Compositae	Agoseris	Agoseris glauca		EOL	468167	title
Rosaceae	Agrimonia	Agrimonia coreana		COL	20240312	accepted name
Rosaceae	Agrimonia	Agrimonia eupatoria		COL	20240313	accepted name
Rosaceae	Agrimonia	Agrimonia gryposepala		COL	20240318	accepted name
Rosaceae	Agrimonia	Agrimonia parviflora		COL	20240323	accepted name
Rosaceae	Agrimonia	Agrimonia asiatica		COL	20240316	synonym
Rosaceae	Agrimonia	Agrimonia procera		COL	20240330	accepted name
Rosaceae	Agrimonia	Agrimonia repens		COL	20240332	accepted name
Rosaceae	Agrimonia	Agrimonia japonica		COL	20240325	synonym
Rosaceae	Agrimonia	Agrimonia odorata		COL	20240332	synonym
Rosaceae	Agrimonia	Agrimonia coreana		EOL	637536	title
Rosaceae	Agrimonia	Agrimonia eupatoria		EOL	0	Ambiguous
Rosaceae	Agrimonia	Agrimonia odorata		EOL	634530	title
Rosaceae	Agrimonia	Agrimonia gryposepala		EOL	637540	title
Rosaceae	Agrimonia	Agrimonia parviflora		EOL	242429	title
Rosaceae	Agrimonia	Agrimonia japonica		EOL	631738	content
Rosaceae	Agrimonia	Agrimonia procera		EOL	631794	title
Rosaceae	Agrimonia	Agrimonia repens		EOL	0	Ambiguous
Rosaceae	Agrimonia	Agrimonia asiatica	NA	EOL	41841309	title
Poaceae	Agropyron	Agropyron desertorum		COL	19225325	accepted name
Poaceae	Agropyron	Agropyron pectiniforme		COL	19225248	synonym
Poaceae	Agropyron	Agropyron pectiniforme		EOL	0	Ambiguous
Poaceae	Agropyron	Agropyron desertorum		EOL	1114163	title
Caryophyllaceae	Agrostemma	Agrostemma brachyloba		COL	20277355	accepted name
Caryophyllaceae	Agrostemma	Agrostemma githago		COL	20277356	accepted name
Caryophyllaceae	Agrostemma	Agrostemma brachyloba		EOL	483364	title
Caryophyllaceae	Agrostemma	Agrostemma githago		EOL	587250	title
Poaceae	Agrostis	Agrostis canina		COL	19226266	accepted name
Poaceae	Agrostis	Agrostis capillaris		COL	19224667	accepted name
Poaceae	Agrostis	Agrostis gigantea		COL	19226554	accepted name
Poaceae	Agrostis	Agrostis nevadensis		COL	19226919	accepted name
Poaceae	Agrostis	Agrostis rupestris		COL	19227186	accepted name
Poaceae	Agrostis	Agrostis rupestris subsp. rupestris		COL	19309690	accepted name
Poaceae	Agrostis	Agrostis stolonifera		COL	19227335	accepted name
Poaceae	Agrostis	Agrostis canina		EOL	1114166	title
Poaceae	Agrostis	Agrostis capillaris		EOL	1114012	title
Poaceae	Agrostis	Agrostis gigantea		EOL	1114174	title
Poaceae	Agrostis	Agrostis rupestris		EOL	5816289	title
Poaceae	Agrostis	Agrostis stolonifera		EOL	1114169	title
Poaceae	Agrostis	Agrostis nevadensis	NA	EOL	23044605	title
Poaceae	Agrostis	Agrostis rupestris subsp. pyrenaicus	Agrostis rupestris subsp. pyrenaica	EOL	23044597	title
Poaceae	Agrostis	Agrostis rupestris subsp. rupestris	NA	EOL	40544492	title
Crassulaceae	Aichryson	Aichryson bollei		COL	20215635	accepted name
Crassulaceae	Aichryson	Aichryson laxum		COL	20215639	accepted name
Crassulaceae	Aichryson	Aichryson pachycaulon		COL	20215641	accepted name
Crassulaceae	Aichryson	Aichryson punctatum		COL	20215645	accepted name
Crassulaceae	Aichryson	Aichryson laxum		EOL	5550746	title
Crassulaceae	Aichryson	Aichryson pachycaulon		EOL	5550750	title
Crassulaceae	Aichryson	Aichryson punctatum		EOL	5550762	title
Simaroubaceae	Ailanthus	Ailanthus altissima		COL	20261159	accepted name
Simaroubaceae	Ailanthus	Ailanthus altissima		EOL	5614169	title
Compositae	Ainsliaea	Ainsliaea acerifolia var. subapoda		COL	17825613	provisionally accepted name
Compositae	Ainsliaea	Ainsliaea fragrans		COL	17796049	provisionally accepted name
Compositae	Ainsliaea	Ainsliaea acerifolia var. subapoda		EOL	6262452	title
Compositae	Ainsliaea	Ainsliaea fragrans		EOL	6262365	title
Apiaceae	Ainsworthia	Ainsworthia trachycarpa		COL	9466289	accepted name
Apiaceae	Ainsworthia	Ainsworthia trachycarpa		EOL	5045238	title
Arecaceae	Aiphanes	Aiphanes aculeata		COL	19314924	synonym
Arecaceae	Aiphanes	Aiphanes aculeata		EOL	1092416	content
Poaceae	Aira	Aira caryophyllea		COL	19227764	accepted name
Poaceae	Aira	Aira elegantissima		COL	19227843	accepted name
Poaceae	Aira	Aira praecox		COL	19227999	accepted name
Poaceae	Aira	Aira caryophyllea		EOL	1114137	title
Poaceae	Aira	Aira elegantissima		EOL	1115807	title
Poaceae	Aira	Aira praecox		EOL	1114138	title
Aizoaceae	Aizoon	Aizoon canariense		COL	20280345	accepted name
Aizoaceae	Aizoon	Aizoon canariense		EOL	2899783	title
Lamiaceae	Ajuga	Ajuga chamaepitys		COL	19315782	accepted name
Lamiaceae	Ajuga	Ajuga genevensis		COL	19316426	accepted name
Lamiaceae	Ajuga	Ajuga pyramidalis		COL	19317464	accepted name
Lamiaceae	Ajuga	Ajuga reptans		COL	19317621	accepted name
Lamiaceae	Ajuga	Ajuga chamaepitys		EOL	579805	title
Lamiaceae	Ajuga	Ajuga genevensis		EOL	579638	title
Lamiaceae	Ajuga	Ajuga pyramidalis		EOL	5372993	title
Lamiaceae	Ajuga	Ajuga reptans		EOL	579637	title
Lardizabalaceae	Akebia	Akebia quinata		COL	20203539	accepted name
Lardizabalaceae	Akebia	Akebia trifoliata		COL	20203540	accepted name
Lardizabalaceae	Akebia	Akebia quinata		EOL	594926	title
Lardizabalaceae	Akebia	Akebia trifoliata		EOL	2886350	title
Cornaceae	Alangium	Alangium javanicum		COL	19319197	accepted name
Cornaceae	Alangium	Alangium platanifolium		COL	19319589	accepted name
Cornaceae	Alangium	Alangium javanicum		EOL	6874569	title
Cornaceae	Alangium	Alangium platanifolium		EOL	6874595	title
Leguminosae	Albizia	Albizia acle		COL	11486285	accepted name
Leguminosae	Albizia	Albizia carrii		COL	11486286	accepted name
Leguminosae	Albizia	Albizia julibrissin		COL	11477417	accepted name
Leguminosae	Albizia	Albizia lophantha		COL	11479078	synonym
Leguminosae	Albizia	Albizia acle		EOL	663275	title
Leguminosae	Albizia	Albizia carrii		EOL	663276	title
Leguminosae	Albizia	Albizia julibrissin		EOL	640054	title
Leguminosae	Albizia	Albizia lophantha		EOL	645457	content
Not Found	Albizzia	Albizzia kalkora		EOL	0	Ambiguous
Asparagaceae	Albuca	Albuca bracteata		COL	19292961	accepted name
Asparagaceae	Albuca	Albuca humilis		COL	19150570	accepted name
Asparagaceae	Albuca	Albuca longipes		COL	19150588	accepted name
Asparagaceae	Albuca	Albuca shawii		COL	19150648	accepted name
Asparagaceae	Albuca	Albuca angolensis		COL	19150473	synonym
Asparagaceae	Albuca	Albuca bracteata		EOL	1014179	title
Asparagaceae	Albuca	Albuca humilis		EOL	1084105	title
Asparagaceae	Albuca	Albuca longipes		EOL	1084116	title
Asparagaceae	Albuca	Albuca shawii		EOL	1084142	title
Asparagaceae	Albuca	Albuca angolensis	NA	EOL	1084060	content
Bromeliaceae	Alcantarea	Alcantarea geniculata		COL	19127440	synonym
Bromeliaceae	Alcantarea	Alcantarea geniculata		EOL	0	Ambiguous
Malvaceae	Alcea	Alcea excubita		COL	20269267	accepted name
Malvaceae	Alcea	Alcea litwinowii		COL	20269298	accepted name
Malvaceae	Alcea	Alcea rosea		COL	20269313	accepted name
Malvaceae	Alcea	Alcea rugosa		COL	20269315	accepted name
Malvaceae	Alcea	Alcea setosa		COL	20269319	accepted name
Malvaceae	Alcea	Alcea excubita		EOL	5413833	title
Malvaceae	Alcea	Alcea rosea		EOL	584460	title
Malvaceae	Alcea	Alcea rugosa		EOL	5413890	title
Malvaceae	Alcea	Alcea setosa		EOL	5413894	title
Malvaceae	Alcea	Alcea litwinowii	NA	EOL	26790595	title
Rosaceae	Alchemilla	Alchemilla alpina		COL	20239819	accepted name
Rosaceae	Alchemilla	Alchemilla bulgarica		COL	20239898	accepted name
Rosaceae	Alchemilla	Alchemilla caucasica		COL	20239921	accepted name
Rosaceae	Alchemilla	Alchemilla cinerea		COL	20239937	accepted name
Rosaceae	Alchemilla	Alchemilla colorata		COL	20239942	accepted name
Rosaceae	Alchemilla	Alchemilla conjuncta		COL	20239950	accepted name
Rosaceae	Alchemilla	Alchemilla epipsila		COL	20240021	accepted name
Rosaceae	Alchemilla	Alchemilla erythropoda		COL	20240023	accepted name
Rosaceae	Alchemilla	Alchemilla firma		COL	20238834	accepted name
Rosaceae	Alchemilla	Alchemilla fissa		COL	20238838	accepted name
Rosaceae	Alchemilla	Alchemilla flabellata		COL	20238840	accepted name
Rosaceae	Alchemilla	Alchemilla glacialis		COL	20238871	accepted name
Rosaceae	Alchemilla	Alchemilla glaucescens		COL	20238872	accepted name
Rosaceae	Alchemilla	Alchemilla hoppeana		COL	20238939	accepted name
Rosaceae	Alchemilla	Alchemilla japonica		COL	20239548	accepted name
Rosaceae	Alchemilla	Alchemilla ladislai		COL	20238826	accepted name
Rosaceae	Alchemilla	Alchemilla mollis		COL	20238965	accepted name
Rosaceae	Alchemilla	Alchemilla monticola		COL	20238968	accepted name
Rosaceae	Alchemilla	Alchemilla pentaphyllea		COL	20239474	accepted name
Rosaceae	Alchemilla	Alchemilla saxatilis		COL	20240055	accepted name
Rosaceae	Alchemilla	Alchemilla speciosa		COL	20240097	accepted name
Rosaceae	Alchemilla	Alchemilla splendens		COL	20240099	accepted name
Rosaceae	Alchemilla	Alchemilla straminea		COL	20240110	accepted name
Rosaceae	Alchemilla	Alchemilla plicatula		COL	20239492	accepted name
Rosaceae	Alchemilla	Alchemilla vulgaris		COL	20240188	accepted name
Rosaceae	Alchemilla	Alchemilla rigida		COL	20240073	synonym
Rosaceae	Alchemilla	Alchemilla acutiloba		COL	0	Ambiguous (3)
Rosaceae	Alchemilla	Alchemilla hybrida		COL	0	Ambiguous (3)
Rosaceae	Alchemilla	Alchemilla acutiloba		EOL	637557	title
Rosaceae	Alchemilla	Alchemilla alpina		EOL	628526	title
Rosaceae	Alchemilla	Alchemilla bulgarica		EOL	230983	title
Rosaceae	Alchemilla	Alchemilla caucasica		EOL	230997	title
Rosaceae	Alchemilla	Alchemilla cinerea		EOL	231003	title
Rosaceae	Alchemilla	Alchemilla colorata		EOL	231008	title
Rosaceae	Alchemilla	Alchemilla conjuncta		EOL	231015	title
Rosaceae	Alchemilla	Alchemilla epipsila		EOL	632033	title
Rosaceae	Alchemilla	Alchemilla erythropoda		EOL	414345	title
Rosaceae	Alchemilla	Alchemilla firma		EOL	411919	content
Rosaceae	Alchemilla	Alchemilla fissa		EOL	414357	title
Rosaceae	Alchemilla	Alchemilla flabellata		EOL	414204	title
Rosaceae	Alchemilla	Alchemilla glacialis		EOL	414380	title
Rosaceae	Alchemilla	Alchemilla glaucescens		EOL	414381	title
Rosaceae	Alchemilla	Alchemilla hoppeana		EOL	414412	title
Rosaceae	Alchemilla	Alchemilla hybrida		EOL	0	Ambiguous
Rosaceae	Alchemilla	Alchemilla japonica		EOL	414435	title
Rosaceae	Alchemilla	Alchemilla mollis		EOL	791887	title
Rosaceae	Alchemilla	Alchemilla monticola		EOL	791888	title
Rosaceae	Alchemilla	Alchemilla pentaphyllea		EOL	630387	title
Rosaceae	Alchemilla	Alchemilla saxatilis		EOL	411935	title
Rosaceae	Alchemilla	Alchemilla rigida		EOL	411949	content
Rosaceae	Alchemilla	Alchemilla speciosa		EOL	411960	title
Rosaceae	Alchemilla	Alchemilla splendens		EOL	0	Ambiguous
Rosaceae	Alchemilla	Alchemilla straminea		EOL	411970	title
Rosaceae	Alchemilla	Alchemilla plicatula		EOL	0	Ambiguous
Rosaceae	Alchemilla	Alchemilla vulgaris		EOL	632883	title
Rosaceae	Alchemilla	Alchemilla ladislai	NA	EOL	630239	title
Euphorbiaceae	Alchornea	Alchornea scandens	NA	EOL	1146116	title
Asparagaceae	Alectorurus	Alectorurus yedoensis		COL	19159282	synonym
Asparagaceae	Alectorurus	Alectorurus yedoensis	NA	EOL	1087069	content
Sapindaceae	Alectryon	Alectryon coriaceus		COL	20256934	accepted name
Sapindaceae	Alectryon	Alectryon coriaceus		EOL	5628106	title
Euphorbiaceae	Aleurites	Aleurites moluccanus		COL	19322656	accepted name
Euphorbiaceae	Aleurites	Aleurites fordii		COL	19067292	synonym
Euphorbiaceae	Aleurites	Aleurites cordata		EOL	1149442	content
Euphorbiaceae	Aleurites	Aleurites moluccanus		EOL	1146100	title
Euphorbiaceae	Aleurites	Aleurites fordii		EOL	1149441	content
Compositae	Alfredia	Alfredia cernua		COL	17819820	provisionally accepted name
Compositae	Alfredia	Alfredia cernua		EOL	2895812	title
Leguminosae	Alhagi	Alhagi pseudalhagi		COL	11471748	synonym
Leguminosae	Alhagi	Alhagi pseudalhagi		EOL	703028	content
Alismataceae	Alisma	Alisma gramineum		COL	19150809	accepted name
Alismataceae	Alisma	Alisma lanceolatum		COL	19150830	accepted name
Alismataceae	Alisma	Alisma plantago-aquatica subsp. plantago-aquatica		COL	19167063	accepted name
Alismataceae	Alisma	Alisma plantago-aquatica		COL	19150860	accepted name
Alismataceae	Alisma	Alisma plantago-aquatica subsp. orientale		COL	19150866	accepted name
Alismataceae	Alisma	Alisma subcordatum		COL	19150890	accepted name
Alismataceae	Alisma	Alisma canaliculatum		EOL	1084190	title
Alismataceae	Alisma	Alisma gramineum		EOL	1084191	title
Alismataceae	Alisma	Alisma lanceolatum		EOL	1084194	title
Alismataceae	Alisma	Alisma plantago-aquatica subsp. plantago-aquatica		EOL	1290814	title
Alismataceae	Alisma	Alisma plantago-aquatica		EOL	1084197	title
Alismataceae	Alisma	Alisma plantago-aquatica subsp. orientale		EOL	1290279	title
Alismataceae	Alisma	Alisma subcordatum		EOL	1084200	title
Boraginaceae	Alkanna	Alkanna orientalis		COL	20327907	accepted name
Boraginaceae	Alkanna	Alkanna tinctoria		COL	20327935	accepted name
Boraginaceae	Alkanna	Alkanna orientalis		EOL	5357127	title
Boraginaceae	Alkanna	Alkanna tinctoria		EOL	483843	title
Compositae	Allagopappus	Allagopappus dichotomus		COL	17809928	synonym
Compositae	Allagopappus	Allagopappus dichotomus		EOL	39888754	title
Apocynaceae	Allamanda	Allamanda cathartica		COL	20300846	accepted name
Apocynaceae	Allamanda	Allamanda schottii		COL	20300854	accepted name
Apocynaceae	Allamanda	Allamanda cathartica		EOL	580449	title
Apocynaceae	Allamanda	Allamanda schottii		EOL	580447	title
Brassicaceae	Alliaria	Alliaria petiolata		COL	7145789	accepted name
Brassicaceae	Alliaria	Alliaria petiolata		EOL	596346	title
Amaryllidaceae	Allium	Allium aflatunense		COL	19150933	accepted name
Amaryllidaceae	Allium	Allium altaicum		COL	19150974	accepted name
Amaryllidaceae	Allium	Allium altissimum		COL	19150975	accepted name
Amaryllidaceae	Allium	Allium altyncolicum		COL	19150976	accepted name
Amaryllidaceae	Allium	Allium amethystinum		COL	19150987	accepted name
Amaryllidaceae	Allium	Allium ampeloprasum		COL	19150992	accepted name
Amaryllidaceae	Allium	Allium amphibolum		COL	19151019	accepted name
Amaryllidaceae	Allium	Allium amplectens		COL	19151021	accepted name
Amaryllidaceae	Allium	Allium ascalonicum		COL	19151084	accepted name
Amaryllidaceae	Allium	Allium aschersonianum		COL	19151087	accepted name
Amaryllidaceae	Allium	Allium atropurpureum		COL	19151103	accepted name
Amaryllidaceae	Allium	Allium atroviolaceum		COL	19151114	accepted name
Amaryllidaceae	Allium	Allium baeticum		COL	19151137	accepted name
Amaryllidaceae	Allium	Allium barsczewskii		COL	19151151	accepted name
Amaryllidaceae	Allium	Allium beesianum		COL	19151162	accepted name
Amaryllidaceae	Allium	Allium bidentatum		COL	19151165	accepted name
Amaryllidaceae	Allium	Allium brevistylum		COL	19151223	accepted name
Amaryllidaceae	Allium	Allium bucharicum		COL	19151227	accepted name
Amaryllidaceae	Allium	Allium caeruleum		COL	19151241	accepted name
Amaryllidaceae	Allium	Allium caesium		COL	19151246	accepted name
Amaryllidaceae	Allium	Allium cardiostemon		COL	19151284	accepted name
Amaryllidaceae	Allium	Allium carinatum		COL	19151289	accepted name
Amaryllidaceae	Allium	Allium cepa		COL	19151309	accepted name
Amaryllidaceae	Allium	Allium cernuum		COL	19151314	accepted name
Amaryllidaceae	Allium	Allium chamaemoly		COL	19151320	accepted name
Amaryllidaceae	Allium	Allium chinense		COL	19151336	accepted name
Amaryllidaceae	Allium	Allium clathratum		COL	19151370	accepted name
Amaryllidaceae	Allium	Allium curtum		COL	19151444	accepted name
Amaryllidaceae	Allium	Allium cyaneum		COL	19151453	accepted name
Amaryllidaceae	Allium	Allium cyathophorum var. farreri		COL	19151456	accepted name
Amaryllidaceae	Allium	Allium decipiens		COL	19151479	accepted name
Amaryllidaceae	Allium	Allium derderianum		COL	19151493	accepted name
Amaryllidaceae	Allium	Allium drummondii		COL	19151534	accepted name
Amaryllidaceae	Allium	Allium dumetorum		COL	19151538	accepted name
Amaryllidaceae	Allium	Allium ericetorum		COL	19151576	accepted name
Amaryllidaceae	Allium	Allium erubescens		COL	19151580	accepted name
Amaryllidaceae	Allium	Allium fistulosum		COL	19151645	accepted name
Amaryllidaceae	Allium	Allium flavescens		COL	19151648	accepted name
Amaryllidaceae	Allium	Allium flavum		COL	19151652	accepted name
Amaryllidaceae	Allium	Allium flavum var. minus		COL	19151660	accepted name
Amaryllidaceae	Allium	Allium fuscoviolaceum		COL	19151693	accepted name
Amaryllidaceae	Allium	Allium galanthum		COL	19151701	accepted name
Amaryllidaceae	Allium	Allium giganteum		COL	19151710	accepted name
Amaryllidaceae	Allium	Allium glomeratum		COL	19151722	accepted name
Amaryllidaceae	Allium	Allium grande		COL	19151745	accepted name
Amaryllidaceae	Allium	Allium heldreichii		COL	19151783	accepted name
Amaryllidaceae	Allium	Allium insubricum		COL	19151855	accepted name
Amaryllidaceae	Allium	Allium karataviense		COL	19151905	accepted name
Amaryllidaceae	Allium	Allium karelinii		COL	19151907	accepted name
Amaryllidaceae	Allium	Allium kermesinum		COL	19151917	accepted name
Amaryllidaceae	Allium	Allium kokanicum		COL	19151929	accepted name
Amaryllidaceae	Allium	Allium kollmannianum		COL	19151931	accepted name
Amaryllidaceae	Allium	Allium ledebourianum		COL	19151982	accepted name
Amaryllidaceae	Allium	Allium libani		COL	19152005	accepted name
Amaryllidaceae	Allium	Allium adzharicum		COL	19152492	synonym
Amaryllidaceae	Allium	Allium maackii		COL	19152052	accepted name
Amaryllidaceae	Allium	Allium macleanii		COL	19152055	accepted name
Amaryllidaceae	Allium	Allium macranthum		COL	19152057	accepted name
Amaryllidaceae	Allium	Allium macrostemon		COL	19152066	accepted name
Amaryllidaceae	Allium	Allium massaessylum		COL	19152109	accepted name
Amaryllidaceae	Allium	Allium moly		COL	19152154	accepted name
Amaryllidaceae	Allium	Allium multibulbosum		COL	19152188	accepted name
Amaryllidaceae	Allium	Allium narcissiflorum		COL	19152201	accepted name
Amaryllidaceae	Allium	Allium neapolitanum		COL	19152203	accepted name
Amaryllidaceae	Allium	Allium negevense		COL	19152207	accepted name
Amaryllidaceae	Allium	Allium nigrum		COL	19152226	accepted name
Amaryllidaceae	Allium	Allium nutans		COL	19152246	accepted name
Amaryllidaceae	Allium	Allium ochotense		COL	19152257	accepted name
Amaryllidaceae	Allium	Allium oreophilum		COL	19152290	accepted name
Amaryllidaceae	Allium	Allium oreoprasum		COL	19152292	accepted name
Amaryllidaceae	Allium	Allium oschaninii		COL	19152297	accepted name
Amaryllidaceae	Allium	Allium pallens		COL	19152314	accepted name
Amaryllidaceae	Allium	Allium meronense		COL	19306000	accepted name
Amaryllidaceae	Allium	Allium paradoxum		COL	19152363	accepted name
Amaryllidaceae	Allium	Allium phanerantherum		COL	19152409	accepted name
Amaryllidaceae	Allium	Allium platyspathum		COL	19152427	accepted name
Amaryllidaceae	Allium	Allium przewalskianum		COL	19152475	accepted name
Amaryllidaceae	Allium	Allium auctum		COL	19151462	synonym
Amaryllidaceae	Allium	Allium pskemense		COL	19152495	accepted name
Amaryllidaceae	Allium	Allium pyrenaicum		COL	19152519	accepted name
Amaryllidaceae	Allium	Allium rosenbachianum		COL	19152571	accepted name
Amaryllidaceae	Allium	Allium roseum		COL	19152575	accepted name
Amaryllidaceae	Allium	Allium globosum		COL	19152668	synonym
Amaryllidaceae	Allium	Allium rubellum		COL	19152603	accepted name
Amaryllidaceae	Allium	Allium komarovianum		COL	19152634	synonym
Amaryllidaceae	Allium	Allium sarawschanicum		COL	19152656	accepted name
Amaryllidaceae	Allium	Allium sativum		COL	19152658	accepted name
Amaryllidaceae	Allium	Allium monadelphum		COL	19167121	synonym
Amaryllidaceae	Allium	Allium scabriscapum		COL	19152675	accepted name
Amaryllidaceae	Allium	Allium schoenoprasum		COL	19152688	accepted name
Amaryllidaceae	Allium	Allium scorodoprasum		COL	19152717	accepted name
Amaryllidaceae	Allium	Allium semenovii		COL	19152734	accepted name
Amaryllidaceae	Allium	Allium senescens		COL	19152737	accepted name
Amaryllidaceae	Allium	Allium paniculatum subsp. fuscum		COL	19151694	synonym
Amaryllidaceae	Allium	Allium siculum		COL	19152772	accepted name
Amaryllidaceae	Allium	Allium sikkimense		COL	19152775	accepted name
Amaryllidaceae	Allium	Allium sphaerocephalon		COL	19152803	accepted name
Amaryllidaceae	Allium	Allium spirale		COL	19152819	accepted name
Amaryllidaceae	Allium	Allium splendens		COL	19152822	accepted name
Amaryllidaceae	Allium	Allium stellatum		COL	19152838	accepted name
Amaryllidaceae	Allium	Allium stipitatum		COL	19152853	accepted name
Amaryllidaceae	Allium	Allium strictum		COL	19152867	accepted name
Amaryllidaceae	Allium	Allium suaveolens		COL	19152872	accepted name
Amaryllidaceae	Allium	Allium subhirsutum		COL	19152881	accepted name
Amaryllidaceae	Allium	Allium subvillosum		COL	19152910	accepted name
Amaryllidaceae	Allium	Allium suworowii		COL	19152917	accepted name
Amaryllidaceae	Allium	Allium szovitsii		COL	19152925	accepted name
Amaryllidaceae	Allium	Allium tardiflorum		COL	19152939	accepted name
Amaryllidaceae	Allium	Allium textile		COL	19152975	accepted name
Amaryllidaceae	Allium	Allium thunbergii		COL	19152983	accepted name
Amaryllidaceae	Allium	Allium trifoliatum		COL	19153019	accepted name
Amaryllidaceae	Allium	Allium triquetrum		COL	19153027	accepted name
Amaryllidaceae	Allium	Allium tuberosum		COL	19153050	accepted name
Amaryllidaceae	Allium	Allium turkestanicum		COL	19153061	accepted name
Amaryllidaceae	Allium	Allium unifolium		COL	19153077	accepted name
Amaryllidaceae	Allium	Allium ursinum		COL	19153084	accepted name
Amaryllidaceae	Allium	Allium basalticum		COL	19305999	accepted name
Amaryllidaceae	Allium	Allium victorialis		COL	19153108	accepted name
Amaryllidaceae	Allium	Allium vineale		COL	19153115	accepted name
Amaryllidaceae	Allium	Allium vodopjanovae		COL	19153144	accepted name
Amaryllidaceae	Allium	Allium wallichii		COL	19153155	accepted name
Amaryllidaceae	Allium	Allium zaprjagajevii		COL	19153190	accepted name
Amaryllidaceae	Allium	Allium pulchellum		COL	19151290	synonym
Amaryllidaceae	Allium	Allium scorodoprasum subsp. rotundum		COL	19152592	synonym
Amaryllidaceae	Allium	Allium senescens subsp. montanum		COL	19152044	synonym
Amaryllidaceae	Allium	Allium odorum		COL	0	Ambiguous (5)
Amaryllidaceae	Allium	Allium montanum		COL	0	Ambiguous (6)
Amaryllidaceae	Allium	Allium aflatunense		EOL	1084216	title
Amaryllidaceae	Allium	Allium altaicum		EOL	1084229	title
Amaryllidaceae	Allium	Allium altissimum		EOL	1084230	title
Amaryllidaceae	Allium	Allium altyncolicum		EOL	1084231	title
Amaryllidaceae	Allium	Allium amethystinum		EOL	1084232	title
Amaryllidaceae	Allium	Allium ampeloprasum		EOL	8790855	title
Amaryllidaceae	Allium	Allium amphibolum		EOL	1084236	title
Amaryllidaceae	Allium	Allium amplectens		EOL	1084237	title
Amaryllidaceae	Allium	Allium rotundum subsp. rotundum		EOL	39853605	title
Amaryllidaceae	Allium	Allium angulosum		EOL	1084242	title
Amaryllidaceae	Allium	Allium ascalonicum		EOL	1084258	title
Amaryllidaceae	Allium	Allium aschersonianum		EOL	1084259	title
Amaryllidaceae	Allium	Allium atropurpureum		EOL	1084265	title
Amaryllidaceae	Allium	Allium monadelphum		EOL	39853312	title
Amaryllidaceae	Allium	Allium atroviolaceum		EOL	1084268	title
Amaryllidaceae	Allium	Allium ursinum subsp. ursinum		EOL	0	Ambiguous
Amaryllidaceae	Allium	Allium beesianum		EOL	1084287	title
Amaryllidaceae	Allium	Allium bidentatum		EOL	1084289	title
Amaryllidaceae	Allium	Allium brevistylum		EOL	1084318	title
Amaryllidaceae	Allium	Allium bucharicum		EOL	1084320	title
Amaryllidaceae	Allium	Allium caeruleum		EOL	1084326	title
Amaryllidaceae	Allium	Allium caesium		EOL	1084328	title
Amaryllidaceae	Allium	Allium cardiostemon		EOL	1084344	title
Amaryllidaceae	Allium	Allium carinatum		EOL	1084345	title
Amaryllidaceae	Allium	Allium pulchellum		EOL	1290292	content
Amaryllidaceae	Allium	Allium carolinianum		EOL	1084349	title
Amaryllidaceae	Allium	Allium cepa		EOL	1084354	title
Amaryllidaceae	Allium	Allium cernuum		EOL	1084355	title
Amaryllidaceae	Allium	Allium chamaemoly		EOL	1084359	title
Amaryllidaceae	Allium	Allium chinense		EOL	1084367	title
Amaryllidaceae	Allium	Allium clathratum		EOL	1084384	title
Amaryllidaceae	Allium	Allium christophii		EOL	1084376	content
Amaryllidaceae	Allium	Allium cyaneum		EOL	1084409	title
Amaryllidaceae	Allium	Allium cyathophorum var. farreri		EOL	1290296	title
Amaryllidaceae	Allium	Allium decipiens		EOL	1084422	title
Amaryllidaceae	Allium	Allium albidum		EOL	0	Ambiguous
Amaryllidaceae	Allium	Allium derderianum		EOL	1084429	title
Amaryllidaceae	Allium	Allium drummondii		EOL	1084451	title
Amaryllidaceae	Allium	Allium dumetorum		EOL	1084454	title
Amaryllidaceae	Allium	Allium ericetorum		EOL	1084471	title
Amaryllidaceae	Allium	Allium fistulosum		EOL	1084499	title
Amaryllidaceae	Allium	Allium flavescens		EOL	1084501	title
Amaryllidaceae	Allium	Allium flavum		EOL	1084503	title
Amaryllidaceae	Allium	Allium flavum var. minus		EOL	11849875	title
Amaryllidaceae	Allium	Allium fuscoviolaceum		EOL	1084514	title
Amaryllidaceae	Allium	Allium paniculatum subsp. fuscum		EOL	1084515	content
Amaryllidaceae	Allium	Allium galanthum		EOL	1084516	title
Amaryllidaceae	Allium	Allium galilaeum		EOL	43946726	title
Amaryllidaceae	Allium	Allium giganteum		EOL	1084518	title
Amaryllidaceae	Allium	Allium glomeratum		EOL	1084524	title
Amaryllidaceae	Allium	Allium heldreichii		EOL	1084556	title
Amaryllidaceae	Allium	Allium insubricum		EOL	0	Ambiguous
Amaryllidaceae	Allium	Allium karataviense		EOL	1084615	title
Amaryllidaceae	Allium	Allium karelinii		EOL	1084616	title
Amaryllidaceae	Allium	Allium kermesinum		EOL	1084622	title
Amaryllidaceae	Allium	Allium ledebourianum		EOL	1084651	title
Amaryllidaceae	Allium	Allium libani		EOL	1084661	title
Amaryllidaceae	Allium	Allium senescens subsp. montanum		EOL	0	Ambiguous
Amaryllidaceae	Allium	Allium maackii		EOL	1084684	title
Amaryllidaceae	Allium	Allium macleanii		EOL	1084687	title
Amaryllidaceae	Allium	Allium macranthum		EOL	1084688	title
Amaryllidaceae	Allium	Allium macrostemon		EOL	1084691	title
Amaryllidaceae	Allium	Allium massaessylum		EOL	1084709	title
Amaryllidaceae	Allium	Allium moly		EOL	1084730	title
Amaryllidaceae	Allium	Allium narcissiflorum		EOL	1084742	title
Amaryllidaceae	Allium	Allium neapolitanum		EOL	1084743	title
Amaryllidaceae	Allium	Allium negevense		EOL	1084745	title
Amaryllidaceae	Allium	Allium nigrum		EOL	1084752	title
Amaryllidaceae	Allium	Allium nutans		EOL	1084758	title
Amaryllidaceae	Allium	Allium ochotense		EOL	1084762	title
Amaryllidaceae	Allium	Allium oleraceum		EOL	1084764	title
Amaryllidaceae	Allium	Allium oreophilum		EOL	1084776	title
Amaryllidaceae	Allium	Allium oreoprasum		EOL	1084778	title
Amaryllidaceae	Allium	Allium oschaninii		EOL	1084782	title
Amaryllidaceae	Allium	Allium pallens		EOL	1084789	title
Amaryllidaceae	Allium	Allium meronense		EOL	43942637	title
Amaryllidaceae	Allium	Allium paradoxum		EOL	1084799	title
Amaryllidaceae	Allium	Allium phanerantherum		EOL	1084821	title
Amaryllidaceae	Allium	Allium platyspathum		EOL	1084831	title
Amaryllidaceae	Allium	Allium proliferum		EOL	5874493	content
Amaryllidaceae	Allium	Allium przewalskianum		EOL	1084850	title
Amaryllidaceae	Allium	Allium pskemense		EOL	1084860	title
Amaryllidaceae	Allium	Allium pyrenaicum		EOL	1084867	title
Amaryllidaceae	Allium	Allium odorum		EOL	0	Ambiguous
Amaryllidaceae	Allium	Allium rosenbachianum		EOL	1084892	title
Amaryllidaceae	Allium	Allium roseum		EOL	1084894	title
Amaryllidaceae	Allium	Allium scorodoprasum subsp. rotundum		EOL	1084896	content
Amaryllidaceae	Allium	Allium rubellum		EOL	1084900	title
Amaryllidaceae	Allium	Allium komarovianum		EOL	11379027	title
Amaryllidaceae	Allium	Allium sarawschanicum		EOL	1084925	title
Amaryllidaceae	Allium	Allium sativum		EOL	1084926	title
Amaryllidaceae	Allium	Allium globosum		EOL	1084929	content
Amaryllidaceae	Allium	Allium scabriscapum		EOL	1084931	title
Amaryllidaceae	Allium	Allium schoenoprasum		EOL	1084938	title
Amaryllidaceae	Allium	Allium scorodoprasum		EOL	1084944	title
Amaryllidaceae	Allium	Allium senescens		EOL	1084950	title
Amaryllidaceae	Allium	Allium montanum		EOL	11378768	content
Amaryllidaceae	Allium	Allium siculum		EOL	1084961	title
Amaryllidaceae	Allium	Allium sikkimense		EOL	1084963	title
Amaryllidaceae	Allium	Allium sphaerocephalon		EOL	1084981	title
Amaryllidaceae	Allium	Allium spirale		EOL	1084983	title
Amaryllidaceae	Allium	Allium splendens		EOL	1084985	title
Amaryllidaceae	Allium	Allium stellatum		EOL	1084993	title
Amaryllidaceae	Allium	Allium stipitatum		EOL	1084999	title
Amaryllidaceae	Allium	Allium strictum		EOL	1085003	title
Amaryllidaceae	Allium	Allium suaveolens		EOL	1085006	title
Amaryllidaceae	Allium	Allium subhirsutum		EOL	1085008	title
Amaryllidaceae	Allium	Allium subvillosum		EOL	1085013	title
Amaryllidaceae	Allium	Allium suworowii		EOL	1085015	title
Amaryllidaceae	Allium	Allium tardiflorum		EOL	1085029	title
Amaryllidaceae	Allium	Allium textile		EOL	1085044	title
Amaryllidaceae	Allium	Allium thunbergii		EOL	1085047	title
Amaryllidaceae	Allium	Allium trifoliatum		EOL	1085062	title
Amaryllidaceae	Allium	Allium triquetrum		EOL	1085066	title
Amaryllidaceae	Allium	Allium tuberosum		EOL	1085072	title
Amaryllidaceae	Allium	Allium turkestanicum		EOL	1085079	title
Amaryllidaceae	Allium	Allium unifolium		EOL	1085087	title
Amaryllidaceae	Allium	Allium ursinum		EOL	1085089	title
Amaryllidaceae	Allium	Allium basalticum		EOL	43946867	title
Amaryllidaceae	Allium	Allium victorialis		EOL	1085098	title
Amaryllidaceae	Allium	Allium vineale		EOL	1085100	title
Amaryllidaceae	Allium	Allium vodopjanovae		EOL	1085106	title
Amaryllidaceae	Allium	Allium wallichii		EOL	1085110	title
Amaryllidaceae	Allium	Allium zebdanense		EOL	1085129	title
Amaryllidaceae	Allium	Allium christophii	Allium cristophii	COL	19151352	accepted name
Amaryllidaceae	Allium	Allium cyatophorum	Allium cyathophorum	COL	19151455	accepted name
Amaryllidaceae	Allium	Allium cyrillii	Allium cyrilli	COL	19151462	accepted name
Amaryllidaceae	Allium	Allium albidum	Allium validum,Allium alaicum	COL	0	Ambiguous (2)
Amaryllidaceae	Allium	Allium galilaeum	Allium galileum	COL	19217772	accepted name
Amaryllidaceae	Allium	Allium himenorhizum	Allium hymenorhizum	COL	19151830	accepted name
Amaryllidaceae	Allium	Allium montibaicalensis	Allium montibaicalense	COL	19152179	accepted name
Amaryllidaceae	Allium	Allium obliqum	Allium obliquum	COL	19152249	accepted name
Amaryllidaceae	Allium	Allium schuberti	Allium schubertii	COL	19152710	accepted name
Amaryllidaceae	Allium	Allium telavivense	Allium tel-avivense	COL	19152954	accepted name
Amaryllidaceae	Allium	Allium togasii	Allium togashii	COL	19152991	accepted name
Amaryllidaceae	Allium	Allium baeticum	NA	EOL	1084276	title
Amaryllidaceae	Allium	Allium barsczewskii	NA	EOL	1084282	title
Amaryllidaceae	Allium	Allium curtum	NA	EOL	1084407	title
Amaryllidaceae	Allium	Allium cyatophorum	Allium cyathophorum	EOL	1084410	title
Amaryllidaceae	Allium	Allium auctum	NA	EOL	1084413	content
Amaryllidaceae	Allium	Allium cyrillii	NA	EOL	41769698	title
Amaryllidaceae	Allium	Allium erubescens	NA	EOL	1084473	title
Amaryllidaceae	Allium	Allium grande	NA	EOL	1084535	title
Amaryllidaceae	Allium	Allium himenorhizum	Allium hymenorhizum	EOL	1084580	title
Amaryllidaceae	Allium	Allium kokanicum	NA	EOL	1084628	title
Amaryllidaceae	Allium	Allium kollmannianum	NA	EOL	1084629	title
Amaryllidaceae	Allium	Allium yunnanense	NA	EOL	1084695	content
Amaryllidaceae	Allium	Allium montibaicalensis	Allium montibaicalense	EOL	1084734	title
Amaryllidaceae	Allium	Allium multibulbosum	NA	EOL	11378854	title
Amaryllidaceae	Allium	Allium obliqum	Allium obliquum	EOL	1084759	title
Amaryllidaceae	Allium	Allium adzharicum	NA	EOL	1084858	content
Amaryllidaceae	Allium	Allium schuberti	NA	EOL	27734452	title
Amaryllidaceae	Allium	Allium semenovii	NA	EOL	1084949	title
Amaryllidaceae	Allium	Allium szovitsii	NA	EOL	1085020	title
Amaryllidaceae	Allium	Allium telavivense	NA	EOL	1085036	title
Amaryllidaceae	Allium	Allium togasii	Allium togashii	EOL	1085049	title
Amaryllidaceae	Allium	Allium zaprjagajevii	NA	EOL	1085128	title
Casuarinaceae	Allocasuarina	Allocasuarina verticillata		COL	4341280	accepted name
Casuarinaceae	Allocasuarina	Allocasuarina verticillata		EOL	628407	title
Sapindaceae	Allophylus	Allophylus cobbe		COL	20257600	accepted name
Sapindaceae	Allophylus	Allophylus cobbe		EOL	5358696	title
Gesneriaceae	Alloplectus	Alloplectus capitatus		COL	11771637	synonym
Gesneriaceae	Alloplectus	Alloplectus capitatus	NA	EOL	5646760	content
Not Found	Allosorus	Allosorus acrosticus		COL	20133456	synonym
Not Found	Allosorus	Allosorus acrosticus	NA	EOL	40516351	title
Styracaceae	Alniphyllum	Alniphyllum fortunei		COL	20290595	accepted name
Styracaceae	Alniphyllum	Alniphyllum fortunei		EOL	2892286	title
Betulaceae	Alnus	Alnus viridis		COL	0	Ambiguous (2)
Betulaceae	Alnus	Alnus alnobetula		COL	19325764	accepted name
Betulaceae	Alnus	Alnus cordata		COL	19326157	accepted name
Betulaceae	Alnus	Alnus firma		COL	19326587	accepted name
Betulaceae	Alnus	Alnus glutinosa		COL	19326840	accepted name
Betulaceae	Alnus	Alnus hirsuta		COL	19327293	accepted name
Betulaceae	Alnus	Alnus incana		COL	19327367	accepted name
Betulaceae	Alnus	Alnus incana subsp. tenuifolia		COL	19327450	accepted name
Betulaceae	Alnus	Alnus incana subsp. rugosa		COL	19327444	accepted name
Betulaceae	Alnus	Alnus japonica		COL	19327526	accepted name
Betulaceae	Alnus	Alnus nepalensis		COL	19328165	accepted name
Betulaceae	Alnus	Alnus orientalis		COL	19328346	accepted name
Betulaceae	Alnus	Alnus pendula		COL	19328520	accepted name
Betulaceae	Alnus	Alnus rubra		COL	19328577	accepted name
Betulaceae	Alnus	Alnus barbata		COL	19326884	synonym
Betulaceae	Alnus	Alnus sinuata		COL	19301558	synonym
Betulaceae	Alnus	Alnus viridis		EOL	0	Ambiguous
Betulaceae	Alnus	Alnus sinuata		EOL	2472954	content
Betulaceae	Alnus	Alnus alnobetula		EOL	0	Ambiguous
Betulaceae	Alnus	Alnus cordata		EOL	1145955	title
Betulaceae	Alnus	Alnus firma		EOL	1145878	title
Betulaceae	Alnus	Alnus glutinosa		EOL	1145874	title
Betulaceae	Alnus	Alnus barbata		EOL	1296952	content
Betulaceae	Alnus	Alnus hirsuta		EOL	1145867	title
Betulaceae	Alnus	Alnus incana		EOL	1145865	title
Betulaceae	Alnus	Alnus incana subsp. tenuifolia		EOL	1296947	title
Betulaceae	Alnus	Alnus incana subsp. rugosa		EOL	1296948	title
Betulaceae	Alnus	Alnus japonica		EOL	1145857	title
Betulaceae	Alnus	Alnus nepalensis		EOL	1145640	title
Betulaceae	Alnus	Alnus orientalis		EOL	1145636	title
Betulaceae	Alnus	Alnus pendula		EOL	1145617	title
Betulaceae	Alnus	Alnus rubra		EOL	1145612	title
Betulaceae	Alnus	Alnus x spaethii	Alnus spaethii	EOL	5324506	title
Araceae	Alocasia	Alocasia macrorrhiza		EOL	1097840	content
Araceae	Alocasia	Alocasia macrorrhiza	Alocasia macrorrhizos	COL	19330093	accepted name
Xanthorrhoeaceae	Aloe	Aloe aculeata		COL	19153208	accepted name
Xanthorrhoeaceae	Aloe	Aloe africana		COL	19153218	accepted name
Xanthorrhoeaceae	Aloe	Aloe arborescens		COL	19153271	accepted name
Xanthorrhoeaceae	Aloe	Aloe aristata		COL	19153281	accepted name
Xanthorrhoeaceae	Aloe	Aloe buettneri		COL	19153369	accepted name
Xanthorrhoeaceae	Aloe	Aloe buhrii		COL	19153370	accepted name
Xanthorrhoeaceae	Aloe	Aloe ciliaris		COL	19153436	accepted name
Xanthorrhoeaceae	Aloe	Aloe citrea		COL	19153440	accepted name
Xanthorrhoeaceae	Aloe	Aloe cryptopoda		COL	19153485	accepted name
Xanthorrhoeaceae	Aloe	Aloe dawei		COL	19153495	accepted name
Xanthorrhoeaceae	Aloe	Aloe elgonica		COL	19153561	accepted name
Xanthorrhoeaceae	Aloe	Aloe ferox		COL	19153591	accepted name
Xanthorrhoeaceae	Aloe	Aloe fleurentinorum		COL	19153603	accepted name
Xanthorrhoeaceae	Aloe	Aloe glauca		COL	19153637	accepted name
Xanthorrhoeaceae	Aloe	Aloe grandidentata		COL	19153658	accepted name
Xanthorrhoeaceae	Aloe	Aloe harlana		COL	19153673	accepted name
Xanthorrhoeaceae	Aloe	Aloe humilis		COL	19153701	accepted name
Xanthorrhoeaceae	Aloe	Aloe jacksonii		COL	19153733	accepted name
Xanthorrhoeaceae	Aloe	Aloe kedongensis		COL	19153741	accepted name
Xanthorrhoeaceae	Aloe	Aloe kilifiensis		COL	19153747	accepted name
Xanthorrhoeaceae	Aloe	Aloe lateritia var. graminicola		COL	19153770	accepted name
Xanthorrhoeaceae	Aloe	Aloe lateritia var. lateritia		COL	19168748	accepted name
Xanthorrhoeaceae	Aloe	Aloe lutescens		COL	19153826	accepted name
Xanthorrhoeaceae	Aloe	Aloe marlothii		COL	19153852	accepted name
Xanthorrhoeaceae	Aloe	Aloe megalacantha		COL	19153863	accepted name
Xanthorrhoeaceae	Aloe	Aloe microstigma		COL	19153880	accepted name
Xanthorrhoeaceae	Aloe	Aloe mudenensis		COL	19153920	accepted name
Xanthorrhoeaceae	Aloe	Aloe barbadensis		COL	19154338	synonym
Xanthorrhoeaceae	Aloe	Aloe perryi		COL	19154035	accepted name
Xanthorrhoeaceae	Aloe	Aloe pirottae		COL	19154045	accepted name
Xanthorrhoeaceae	Aloe	Aloe plicatilis		COL	19154050	accepted name
Xanthorrhoeaceae	Aloe	Aloe pluridens		COL	19154052	accepted name
Xanthorrhoeaceae	Aloe	Aloe prostrata		COL	19154074	accepted name
Xanthorrhoeaceae	Aloe	Aloe pruinosa		COL	19154077	accepted name
Xanthorrhoeaceae	Aloe	Aloe rauhii		COL	19154108	accepted name
Xanthorrhoeaceae	Aloe	Aloe reitzii		COL	19154114	accepted name
Xanthorrhoeaceae	Aloe	Aloe scobinifolia		COL	19154181	accepted name
Xanthorrhoeaceae	Aloe	Aloe eru		COL	19153387	synonym
Xanthorrhoeaceae	Aloe	Aloe steudneri		COL	19154232	accepted name
Xanthorrhoeaceae	Aloe	Aloe striata		COL	19154233	accepted name
Xanthorrhoeaceae	Aloe	Aloe striatula		COL	19154236	accepted name
Xanthorrhoeaceae	Aloe	Aloe suprafoliata		COL	19154261	accepted name
Xanthorrhoeaceae	Aloe	Aloe suzannae		COL	19154265	accepted name
Xanthorrhoeaceae	Aloe	Aloe vanbalenii		COL	19154323	accepted name
Xanthorrhoeaceae	Aloe	Aloe variegata		COL	19154330	accepted name
Xanthorrhoeaceae	Aloe	Aloe hereroensis var. orpeniae		COL	19153688	synonym
Xanthorrhoeaceae	Aloe	Aloe viridiflora		COL	19154359	accepted name
Xanthorrhoeaceae	Aloe	Aloe mitriformis		COL	19154016	synonym
Xanthorrhoeaceae	Aloe	Aloe saponaria		COL	19308542	synonym
Xanthorrhoeaceae	Aloe	Aloe sessiliflora		COL	19154217	synonym
Xanthorrhoeaceae	Aloe	Aloe striata subsp. karasbergensis		COL	19153739	synonym
Xanthorrhoeaceae	Aloe	Aloe abyssinica		EOL	0	Ambiguous
Xanthorrhoeaceae	Aloe	Aloe aculeata		EOL	1085134	title
Xanthorrhoeaceae	Aloe	Aloe africana		EOL	1085139	title
Xanthorrhoeaceae	Aloe	Aloe arborescens		EOL	1085160	title
Xanthorrhoeaceae	Aloe	Aloe aristata		EOL	1085164	title
Xanthorrhoeaceae	Aloe	Aloe buettneri		EOL	1085572	content
Xanthorrhoeaceae	Aloe	Aloe buhrii		EOL	1085200	title
Xanthorrhoeaceae	Aloe	Aloe castanea		EOL	1085220	title
Xanthorrhoeaceae	Aloe	Aloe chabaudii		EOL	1085223	title
Xanthorrhoeaceae	Aloe	Aloe ciliaris		EOL	0	Ambiguous
Xanthorrhoeaceae	Aloe	Aloe citrea		EOL	13377894	title
Xanthorrhoeaceae	Aloe	Aloe cryptopoda		EOL	1085252	title
Xanthorrhoeaceae	Aloe	Aloe dawei		EOL	1085256	title
Xanthorrhoeaceae	Aloe	Aloe x delaetii		EOL	7023502	title
Xanthorrhoeaceae	Aloe	Aloe elgonica		EOL	1085283	title
Xanthorrhoeaceae	Aloe	Aloe ferox		EOL	1085297	title
Xanthorrhoeaceae	Aloe	Aloe fleurentinorum		EOL	27734957	title
Xanthorrhoeaceae	Aloe	Aloe glauca		EOL	1085317	title
Xanthorrhoeaceae	Aloe	Aloe grandidentata		EOL	1085324	title
Xanthorrhoeaceae	Aloe	Aloe harlana		EOL	1085334	title
Xanthorrhoeaceae	Aloe	Aloe hereroensis var. orpeniae		EOL	1085343	content
Xanthorrhoeaceae	Aloe	Aloe humilis		EOL	1085350	title
Xanthorrhoeaceae	Aloe	Aloe jacksonii		EOL	1085364	title
Xanthorrhoeaceae	Aloe	Aloe striata subsp. karasbergensis		EOL	0	Ambiguous
Xanthorrhoeaceae	Aloe	Aloe kedongensis		EOL	1085368	title
Xanthorrhoeaceae	Aloe	Aloe kilifiensis		EOL	1085371	title
Xanthorrhoeaceae	Aloe	Aloe lateritia var. graminicola		EOL	1290383	title
Xanthorrhoeaceae	Aloe	Aloe lateritia var. lateritia		EOL	0	Ambiguous
Xanthorrhoeaceae	Aloe	Aloe lutescens		EOL	0	Ambiguous
Xanthorrhoeaceae	Aloe	Aloe saponaria		EOL	1089209	content
Xanthorrhoeaceae	Aloe	Aloe marlothii		EOL	1085410	title
Xanthorrhoeaceae	Aloe	Aloe megalacantha		EOL	13377862	title
Xanthorrhoeaceae	Aloe	Aloe microstigma		EOL	1085427	title
Xanthorrhoeaceae	Aloe	Aloe mudenensis		EOL	13377842	title
Xanthorrhoeaceae	Aloe	Aloe mitriformis		EOL	0	Ambiguous
Xanthorrhoeaceae	Aloe	Aloe perryi		EOL	1085480	title
Xanthorrhoeaceae	Aloe	Aloe pirottae		EOL	13378047	title
Xanthorrhoeaceae	Aloe	Aloe plicatilis		EOL	1085486	title
Xanthorrhoeaceae	Aloe	Aloe pluridens		EOL	1085488	title
Xanthorrhoeaceae	Aloe	Aloe prostrata		EOL	13378034	title
Xanthorrhoeaceae	Aloe	Aloe pruinosa		EOL	1085499	title
Xanthorrhoeaceae	Aloe	Aloe rauhii		EOL	1085508	title
Xanthorrhoeaceae	Aloe	Aloe reitzii		EOL	1085510	title
Xanthorrhoeaceae	Aloe	Aloe scobinifolia		EOL	1085538	title
Xanthorrhoeaceae	Aloe	Aloe x spinosissima		EOL	39863586	title
Xanthorrhoeaceae	Aloe	Aloe striata		EOL	1085560	title
Xanthorrhoeaceae	Aloe	Aloe striatula		EOL	0	Ambiguous
Xanthorrhoeaceae	Aloe	Aloe suprafoliata		EOL	1085567	title
Xanthorrhoeaceae	Aloe	Aloe suzannae		EOL	1085568	title
Xanthorrhoeaceae	Aloe	Aloe vanbalenii		EOL	1085593	title
Xanthorrhoeaceae	Aloe	Aloe variegata		EOL	0	Ambiguous
Xanthorrhoeaceae	Aloe	Aloe barbadensis		EOL	1085598	content
Xanthorrhoeaceae	Aloe	Aloe viridiflora		EOL	1085604	title
Xanthorrhoeaceae	Aloe	Aloe brivifolia	Aloe brevifolia	COL	19153352	accepted name
Xanthorrhoeaceae	Aloe	Aloe khamiensis	Aloe khamiesensis	COL	19153746	accepted name
Xanthorrhoeaceae	Aloe	Aloe thraski	Aloe thraskii	COL	19154281	accepted name
Xanthorrhoeaceae	Aloe	Aloe eru	NA	EOL	1085210	content
Xanthorrhoeaceae	Aloe	Aloe sessiliflora	NA	EOL	1085555	content
Xanthorrhoeaceae	Aloe	Aloe steudneri	NA	EOL	1085559	title
Aizoaceae	Aloinopsis	Aloinopsis rubrolineata		COL	20280551	accepted name
Aizoaceae	Aloinopsis	Aloinopsis rubrolineata	NA	EOL	38646120	title
Scrophulariaceae	Alonsoa	Alonsoa meridionalis		COL	20310148	accepted name
Scrophulariaceae	Alonsoa	Alonsoa meridionalis		EOL	5670249	title
Poaceae	Alopecurus	Alopecurus alpinus		COL	0	Ambiguous (2)
Poaceae	Alopecurus	Alopecurus aequalis		COL	19228208	accepted name
Poaceae	Alopecurus	Alopecurus arundinaceus		COL	19228283	accepted name
Poaceae	Alopecurus	Alopecurus bonariensis		COL	19228299	accepted name
Poaceae	Alopecurus	Alopecurus geniculatus		COL	19228359	accepted name
Poaceae	Alopecurus	Alopecurus myosuroides		COL	19228441	accepted name
Poaceae	Alopecurus	Alopecurus pratensis		COL	19228477	accepted name
Poaceae	Alopecurus	Alopecurus rendlei		COL	19228510	accepted name
Poaceae	Alopecurus	Alopecurus aequalis		EOL	1114187	title
Poaceae	Alopecurus	Alopecurus alpinus		EOL	0	Ambiguous
Poaceae	Alopecurus	Alopecurus arundinaceus		EOL	1114190	title
Poaceae	Alopecurus	Alopecurus bonariensis		EOL	5798210	title
Poaceae	Alopecurus	Alopecurus geniculatus		EOL	1114188	title
Poaceae	Alopecurus	Alopecurus myosuroides		EOL	1114193	title
Poaceae	Alopecurus	Alopecurus pratensis		EOL	1114189	title
Poaceae	Alopecurus	Alopecurus rendlei		EOL	1114000	title
Verbenaceae	Aloysia	Aloysia citrodora		COL	19331370	accepted name
Verbenaceae	Aloysia	Aloysia citrodora		EOL	5384974	title
Zingiberaceae	Alpinia	Alpinia calcarata		COL	19072279	accepted name
Zingiberaceae	Alpinia	Alpinia formosana		COL	19072379	accepted name
Zingiberaceae	Alpinia	Alpinia galanga		COL	19072385	accepted name
Zingiberaceae	Alpinia	Alpinia japonica		COL	19072439	accepted name
Zingiberaceae	Alpinia	Alpinia officinarum		COL	19072546	accepted name
Zingiberaceae	Alpinia	Alpinia purpurata		COL	19072605	accepted name
Zingiberaceae	Alpinia	Alpinia zerumbet		COL	19072742	accepted name
Zingiberaceae	Alpinia	Alpinia calcarata		EOL	1126944	title
Zingiberaceae	Alpinia	Alpinia formosana		EOL	1126901	title
Zingiberaceae	Alpinia	Alpinia galanga		EOL	1126897	title
Zingiberaceae	Alpinia	Alpinia japonica		EOL	1126871	title
Zingiberaceae	Alpinia	Alpinia officinarum		EOL	1126822	title
Zingiberaceae	Alpinia	Alpinia purpurata		EOL	1126791	title
Zingiberaceae	Alpinia	Alpinia zerumbet		EOL	1126734	title
Apocynaceae	Alstonia	Alstonia angustifolia		COL	20299291	accepted name
Apocynaceae	Alstonia	Alstonia constricta		COL	20299300	accepted name
Apocynaceae	Alstonia	Alstonia angustifolia		EOL	6848235	content
Apocynaceae	Alstonia	Alstonia constricta		EOL	6848251	title
Alstroemeriaceae	Alstroemeria	Alstroemeria aurea		COL	19154420	accepted name
Alstroemeriaceae	Alstroemeria	Alstroemeria pulchra		COL	19154652	accepted name
Alstroemeriaceae	Alstroemeria	Alstroemeria aurea		EOL	1085634	title
Alstroemeriaceae	Alstroemeria	Alstroemeria pulchra		EOL	1085718	title
Crassulaceae	Altamiranoa	Altamiranoa batesii		COL	20216441	synonym
Crassulaceae	Altamiranoa	Altamiranoa batesii		EOL	5545027	content
Malvaceae	Althaea	Althaea hirsuta		COL	0	Ambiguous (2)
Malvaceae	Althaea	Althaea armeniaca		COL	20269341	accepted name
Malvaceae	Althaea	Althaea cannabina		COL	20269345	accepted name
Malvaceae	Althaea	Althaea officinalis		COL	20269348	accepted name
Malvaceae	Althaea	Althaea armeniaca		EOL	5408877	title
Malvaceae	Althaea	Althaea cannabina		EOL	597504	title
Malvaceae	Althaea	Althaea hirsuta		EOL	597505	title
Malvaceae	Althaea	Althaea officinalis		EOL	584767	title
Malvaceae	Althaea	Althaea froloviana	NA	EOL	5408910	title
Malvaceae	Alyogyne	Alyogyne hakeifolia		COL	20266824	synonym
Malvaceae	Alyogyne	Alyogyne huegelii		COL	20266841	synonym
Malvaceae	Alyogyne	Alyogyne hakeifolia		EOL	5416524	title
Malvaceae	Alyogyne	Alyogyne huegelii		EOL	5416525	title
Leguminosae	Alysicarpus	Alysicarpus vaginalis		COL	11469214	accepted name
Leguminosae	Alysicarpus	Alysicarpus vaginalis		EOL	642408	title
Brassicaceae	Alyssoides	Alyssoides utriculata		COL	7145811	accepted name
Brassicaceae	Alyssoides	Alyssoides utriculata		EOL	5156128	title
Brassicaceae	Alyssum	Alyssum alpestre		COL	7145866	accepted name
Brassicaceae	Alyssum	Alyssum alyssoides		COL	7145878	accepted name
Brassicaceae	Alyssum	Alyssum bertolonii		COL	7146055	accepted name
Brassicaceae	Alyssum	Alyssum bornmuelleri		COL	7141597	accepted name
Brassicaceae	Alyssum	Alyssum cuneifolium		COL	7141862	accepted name
Brassicaceae	Alyssum	Alyssum diffusum		COL	7141951	accepted name
Brassicaceae	Alyssum	Alyssum lenense		COL	7142462	accepted name
Brassicaceae	Alyssum	Alyssum markgrafii		COL	7142617	accepted name
Brassicaceae	Alyssum	Alyssum moellendorfianum		COL	7142685	accepted name
Brassicaceae	Alyssum	Alyssum montanum		COL	7142696	accepted name
Brassicaceae	Alyssum	Alyssum atlanticum		COL	7145977	accepted name
Brassicaceae	Alyssum	Alyssum obovatum		COL	7142896	accepted name
Brassicaceae	Alyssum	Alyssum ovirense		COL	7142962	accepted name
Brassicaceae	Alyssum	Alyssum propinquum		COL	7143162	accepted name
Brassicaceae	Alyssum	Alyssum repens		COL	7143206	accepted name
Brassicaceae	Alyssum	Alyssum simplex		COL	7143328	accepted name
Brassicaceae	Alyssum	Alyssum repens subsp. trichostachyum		COL	7143229	accepted name
Brassicaceae	Alyssum	Alyssum wulfenianum		COL	7143728	accepted name
Brassicaceae	Alyssum	Alyssum corymbosum		COL	7145537	synonym
Brassicaceae	Alyssum	Alyssum gymnopodum		COL	7143606	synonym
Brassicaceae	Alyssum	Alyssum sinuatum		COL	7145551	synonym
Brassicaceae	Alyssum	Alyssum alpestre		EOL	5140751	title
Brassicaceae	Alyssum	Alyssum alyssoides		EOL	583948	title
Brassicaceae	Alyssum	Alyssum argenteum		EOL	5140767	title
Brassicaceae	Alyssum	Alyssum bertolonii		EOL	5140787	title
Brassicaceae	Alyssum	Alyssum bornmuelleri		EOL	5140797	title
Brassicaceae	Alyssum	Alyssum cuneifolium		EOL	5140869	title
Brassicaceae	Alyssum	Alyssum diffusum		EOL	5140897	title
Brassicaceae	Alyssum	Alyssum lenense		EOL	2886457	title
Brassicaceae	Alyssum	Alyssum markgrafii		EOL	5141049	title
Brassicaceae	Alyssum	Alyssum moellendorfianum		EOL	5141072	title
Brassicaceae	Alyssum	Alyssum montanum		EOL	596849	title
Brassicaceae	Alyssum	Alyssum atlanticum		EOL	5140774	title
Brassicaceae	Alyssum	Alyssum murale		EOL	583951	title
Brassicaceae	Alyssum	Alyssum obovatum		EOL	596848	title
Brassicaceae	Alyssum	Alyssum ovirense		EOL	5141110	title
Brassicaceae	Alyssum	Alyssum repens		EOL	5141165	title
Brassicaceae	Alyssum	Alyssum simplex		EOL	2903082	title
Brassicaceae	Alyssum	Alyssum repens subsp. trichostachyum		EOL	6351105	title
Brassicaceae	Alyssum	Alyssum wulfenianum		EOL	5141280	title
Brassicaceae	Alyssum	Alyssum stribrnyi	Alyssum stribryni	COL	7143406	accepted name
Brassicaceae	Alyssum	Alyssum gymnopodum	NA	EOL	16983603	content
Brassicaceae	Alyssum	Alyssum propinquum	NA	EOL	5141144	title
Brassicaceae	Alyssum	Alyssum stribrnyi	NA	EOL	27739465	title
Brassicaceae	Alyssum	Alyssum corymbosum	NA	EOL	5140862	content
Brassicaceae	Alyssum	Alyssum sinuatum	NA	EOL	5150459	content
Apocynaceae	Alyxia	Alyxia buxifolia		COL	20300081	accepted name
Apocynaceae	Alyxia	Alyxia composita		COL	20300086	accepted name
Apocynaceae	Alyxia	Alyxia ruscifolia		COL	20300158	accepted name
Apocynaceae	Alyxia	Alyxia daphnoides		COL	20300102	synonym
Apocynaceae	Alyxia	Alyxia buxifolia		EOL	6850807	title
Apocynaceae	Alyxia	Alyxia composita		EOL	6850822	title
Apocynaceae	Alyxia	Alyxia daphnoides		EOL	6850831	title
Apocynaceae	Alyxia	Alyxia ruscifolia		EOL	6850986	title
Rubiaceae	Amaracarpus	Amaracarpus pubescens		COL	19334823	accepted name
Rubiaceae	Amaracarpus	Amaracarpus pubescens		EOL	1107071	title
Amaranthaceae	Amaranthus	Amaranthus albus		COL	16327351	accepted name
Amaranthaceae	Amaranthus	Amaranthus blitoides		COL	16327352	accepted name
Amaranthaceae	Amaranthus	Amaranthus blitum		COL	16327353	accepted name
Amaranthaceae	Amaranthus	Amaranthus caudatus		COL	16327428	accepted name
Amaranthaceae	Amaranthus	Amaranthus deflexus		COL	16327355	accepted name
Amaranthaceae	Amaranthus	Amaranthus caudatus subsp. caudatus		COL	16326701	accepted name
Amaranthaceae	Amaranthus	Amaranthus graecizans subsp. sylvestris		COL	16324313	accepted name
Amaranthaceae	Amaranthus	Amaranthus graecizans		COL	16327356	accepted name
Amaranthaceae	Amaranthus	Amaranthus hybridus		COL	16327357	accepted name
Amaranthaceae	Amaranthus	Amaranthus powellii		COL	16327358	accepted name
Amaranthaceae	Amaranthus	Amaranthus retroflexus		COL	16327359	accepted name
Amaranthaceae	Amaranthus	Amaranthus spinosus		COL	16327374	accepted name
Amaranthaceae	Amaranthus	Amaranthus tricolor		COL	16325593	accepted name
Amaranthaceae	Amaranthus	Amaranthus bouchonii		COL	16326061	synonym
Amaranthaceae	Amaranthus	Amaranthus cruentus		COL	16327357	synonym
Amaranthaceae	Amaranthus	Amaranthus lividus		COL	16327353	synonym
Amaranthaceae	Amaranthus	Amaranthus albus		EOL	585581	content
Amaranthaceae	Amaranthus	Amaranthus blitoides		EOL	585582	title
Amaranthaceae	Amaranthus	Amaranthus blitum		EOL	597121	title
Amaranthaceae	Amaranthus	Amaranthus lividus		EOL	0	Ambiguous
Amaranthaceae	Amaranthus	Amaranthus caudatus		EOL	585504	title
Amaranthaceae	Amaranthus	Amaranthus crispus		EOL	585506	title
Amaranthaceae	Amaranthus	Amaranthus cruentus		EOL	585507	title
Amaranthaceae	Amaranthus	Amaranthus deflexus		EOL	585509	title
Amaranthaceae	Amaranthus	Amaranthus caudatus subsp. caudatus		EOL	5172301	title
Amaranthaceae	Amaranthus	Amaranthus graecizans		EOL	0	Ambiguous
Amaranthaceae	Amaranthus	Amaranthus hybridus		EOL	585511	title
Amaranthaceae	Amaranthus	Amaranthus powellii		EOL	585490	title
Amaranthaceae	Amaranthus	Amaranthus bouchonii		EOL	0	Ambiguous
Amaranthaceae	Amaranthus	Amaranthus retroflexus		EOL	585492	title
Amaranthaceae	Amaranthus	Amaranthus spinosus		EOL	585494	title
Amaranthaceae	Amaranthus	Amaranthus tricolor		EOL	597119	title
Amaranthaceae	Amaranthus	Amaranthus graecizans subsp. sylvestris	NA	EOL	5171835	title
Amaranthaceae	Amaranthus	Amaranthus flavus	NA	EOL	585507	content
Amaryllidaceae	Amaryllis	Amaryllis bella-donna	Amaryllis belladonna	COL	19154804	accepted name
Amaryllidaceae	Amaryllis	Amaryllis bella-donna	NA	EOL	40151691	title
Boraginaceae	Amblynotus	Amblynotus rupestris		COL	20329069	accepted name
Boraginaceae	Amblynotus	Amblynotus rupestris		EOL	2898441	title
Compositae	Ambrosia	Ambrosia artemisiifolia		COL	17795174	provisionally accepted name
Compositae	Ambrosia	Ambrosia chamissonis		COL	17809751	provisionally accepted name
Compositae	Ambrosia	Ambrosia trifida		COL	17791342	provisionally accepted name
Compositae	Ambrosia	Ambrosia artemisiifolia		EOL	468175	title
Compositae	Ambrosia	Ambrosia chamissonis		EOL	468199	title
Compositae	Ambrosia	Ambrosia trifida		EOL	468221	title
Rosaceae	Amelanchier	Amelanchier spicata		COL	0	Ambiguous (2)
Rosaceae	Amelanchier	Amelanchier alnifolia		COL	20241750	accepted name
Rosaceae	Amelanchier	Amelanchier canadensis		COL	20241217	accepted name
Rosaceae	Amelanchier	Amelanchier laevis		COL	20241220	accepted name
Rosaceae	Amelanchier	Amelanchier ovalis		COL	20241223	accepted name
Rosaceae	Amelanchier	Amelanchier ovalis subsp. cretica		COL	20241225	accepted name
Rosaceae	Amelanchier	Amelanchier sanguinea		COL	20241780	accepted name
Rosaceae	Amelanchier	Amelanchier utahensis		COL	20241785	accepted name
Rosaceae	Amelanchier	Amelanchier alnifolia subsp. pumila		COL	20241779	synonym
Rosaceae	Amelanchier	Amelanchier alnifolia		EOL	411731	title
Rosaceae	Amelanchier	Amelanchier canadensis		EOL	633504	title
Rosaceae	Amelanchier	Amelanchier laevis		EOL	633509	title
Rosaceae	Amelanchier	Amelanchier lamarckii		EOL	633510	title
Rosaceae	Amelanchier	Amelanchier ovalis		EOL	633512	title
Rosaceae	Amelanchier	Amelanchier sanguinea		EOL	633516	title
Rosaceae	Amelanchier	Amelanchier spicata		EOL	231067	title
Rosaceae	Amelanchier	Amelanchier utahensis		EOL	792891	title
Rosaceae	Amelanchier	Amelanchier alnifolia subsp. pumila	Amelanchier alnifolia var. pumila	EOL	633515	content
Lamiaceae	Amethystea	Amethystea caerulea		COL	19337306	accepted name
Lamiaceae	Amethystea	Amethystea caerulea		EOL	2893678	title
Leguminosae	Amherstia	Amherstia nobilis		COL	11479122	accepted name
Leguminosae	Amherstia	Amherstia nobilis		EOL	643018	title
Lythraceae	Ammannia	Ammannia coccinea		COL	20252436	accepted name
Lythraceae	Ammannia	Ammannia coccinea		EOL	583150	title
Apiaceae	Ammi	Ammi majus		COL	9472373	accepted name
Apiaceae	Ammi	Ammi visnaga		COL	9466846	accepted name
Apiaceae	Ammi	Ammi majus		EOL	584988	title
Apiaceae	Ammi	Ammi visnaga		EOL	584989	title
Compositae	Ammobium	Ammobium alatum		COL	17792995	provisionally accepted name
Compositae	Ammobium	Ammobium alatum		EOL	6262732	title
Poaceae	Ammophila	Ammophila arenaria		COL	19228600	accepted name
Poaceae	Ammophila	Ammophila arenaria		EOL	1114196	title
Zingiberaceae	Amomum	Amomum compactum		COL	19072840	accepted name
Zingiberaceae	Amomum	Amomum compactum		EOL	1126683	title
Myrtaceae	Amomyrtus	Amomyrtus luma		EOL	5453662	title
Leguminosae	Amorpha	Amorpha californica		COL	11477418	accepted name
Leguminosae	Amorpha	Amorpha canescens		COL	11478253	accepted name
Leguminosae	Amorpha	Amorpha fruticosa		COL	11472202	accepted name
Leguminosae	Amorpha	Amorpha glabra		COL	11478254	accepted name
Leguminosae	Amorpha	Amorpha nana		COL	11477398	accepted name
Leguminosae	Amorpha	Amorpha paniculata		COL	11477399	accepted name
Leguminosae	Amorpha	Amorpha croceolanata		COL	11472202	synonym
Leguminosae	Amorpha	Amorpha californica		EOL	640055	title
Leguminosae	Amorpha	Amorpha canescens		EOL	642105	title
Leguminosae	Amorpha	Amorpha croceolanata		EOL	506709	content
Leguminosae	Amorpha	Amorpha fruticosa		EOL	506709	title
Leguminosae	Amorpha	Amorpha glabra		EOL	642106	title
Leguminosae	Amorpha	Amorpha nana		EOL	640057	title
Leguminosae	Amorpha	Amorpha paniculata		EOL	640059	title
Araceae	Amorphophallus	Amorphophallus albus		COL	19338329	accepted name
Araceae	Amorphophallus	Amorphophallus bulbifer		COL	19338706	accepted name
Araceae	Amorphophallus	Amorphophallus konjac		COL	19339702	accepted name
Araceae	Amorphophallus	Amorphophallus krausei		COL	19339746	accepted name
Araceae	Amorphophallus	Amorphophallus myosuroides		COL	19293060	accepted name
Araceae	Amorphophallus	Amorphophallus paeoniifolius		COL	19340400	accepted name
Araceae	Amorphophallus	Amorphophallus thaiensis		COL	19305984	accepted name
Araceae	Amorphophallus	Amorphophallus titanum		COL	19341064	accepted name
Araceae	Amorphophallus	Amorphophallus albus		EOL	1098862	title
Araceae	Amorphophallus	Amorphophallus bulbifer		EOL	1112807	title
Araceae	Amorphophallus	Amorphophallus konjac		EOL	1098904	title
Araceae	Amorphophallus	Amorphophallus krausei		EOL	1100356	title
Araceae	Amorphophallus	Amorphophallus myosuroides		EOL	23062525	title
Araceae	Amorphophallus	Amorphophallus paeoniifolius		EOL	1098928	title
Araceae	Amorphophallus	Amorphophallus thaiensis		EOL	39836256	title
Araceae	Amorphophallus	Amorphophallus titanum		EOL	1100364	title
Araceae	Amorphophallus	Amorphophallus mulleri	Amorphophallus muelleri	COL	19340224	accepted name
Araceae	Amorphophallus	Amorphophallus mulleri	NA	EOL	5996052	title
Poaceae	Ampelodesmos	Ampelodesmos mauritanica		EOL	1114140	content
Poaceae	Ampelodesmos	Ampelodesmos mauritanica	Ampelodesmos mauritanicus	COL	19228638	accepted name
Vitaceae	Ampelopsis	Ampelopsis aconitifolia		COL	20219066	accepted name
Vitaceae	Ampelopsis	Ampelopsis cordata		COL	20219078	accepted name
Vitaceae	Ampelopsis	Ampelopsis delavayana		COL	20219079	accepted name
Vitaceae	Ampelopsis	Ampelopsis japonica		COL	20219093	accepted name
Vitaceae	Ampelopsis	Ampelopsis megalophylla		COL	20219094	accepted name
Vitaceae	Ampelopsis	Ampelopsis aconitifolia var. glabra		COL	20219080	synonym
Vitaceae	Ampelopsis	Ampelopsis glandulosa var. brevipedunculata		COL	20219087	synonym
Vitaceae	Ampelopsis	Ampelopsis glandulosa var. heterophylla		COL	20219086	synonym
Vitaceae	Ampelopsis	Ampelopsis aconitifolia		EOL	466735	title
Vitaceae	Ampelopsis	Ampelopsis cordata		EOL	582307	title
Vitaceae	Ampelopsis	Ampelopsis delavayana		EOL	2889295	title
Vitaceae	Ampelopsis	Ampelopsis glandulosa var. brevipedunculata		EOL	582306	title
Vitaceae	Ampelopsis	Ampelopsis glandulosa var. heterophylla		EOL	5537638	title
Vitaceae	Ampelopsis	Ampelopsis japonica		EOL	2889296	title
Vitaceae	Ampelopsis	Ampelopsis megalophylla		EOL	2905488	title
Vitaceae	Ampelopsis	Ampelopsis americana	Ampelopsis mexicana	EOL	596834	title
Vitaceae	Ampelopsis	Ampelopsis aconitifolia var. glabra	NA	EOL	41863833	title
Leguminosae	Amphicarpaea	Amphicarpaea bracteata		COL	11475002	accepted name
Leguminosae	Amphicarpaea	Amphicarpaea bracteata		EOL	638811	title
Thelypteridaceae	Amphineuron	Amphineuron immersum		COL	20135681	synonym
Thelypteridaceae	Amphineuron	Amphineuron immersum		EOL	6127912	title
Bignoniaceae	Amphitecna	Amphitecna latifolia		COL	20316579	accepted name
Bignoniaceae	Amphitecna	Amphitecna latifolia		EOL	580327	title
Boraginaceae	Amsinckia	Amsinckia calycina		COL	20328089	accepted name
Boraginaceae	Amsinckia	Amsinckia calycina		EOL	0	Ambiguous
Apocynaceae	Amsonia	Amsonia ciliata		COL	20300774	accepted name
Apocynaceae	Amsonia	Amsonia hubrichtii		COL	20300780	accepted name
Apocynaceae	Amsonia	Amsonia illustris		COL	20300781	accepted name
Apocynaceae	Amsonia	Amsonia orientalis		COL	20300787	accepted name
Apocynaceae	Amsonia	Amsonia rigida		COL	20300791	accepted name
Apocynaceae	Amsonia	Amsonia tabernaemontana		COL	20300792	accepted name
Apocynaceae	Amsonia	Amsonia tabernaemontana var. salicifolia		COL	20300794	accepted name
Apocynaceae	Amsonia	Amsonia texana		COL	20300776	synonym
Apocynaceae	Amsonia	Amsonia ciliata		EOL	581392	title
Apocynaceae	Amsonia	Amsonia texana		EOL	6847825	title
Apocynaceae	Amsonia	Amsonia hubrichtii		EOL	581393	title
Apocynaceae	Amsonia	Amsonia illustris		EOL	581396	title
Apocynaceae	Amsonia	Amsonia orientalis		EOL	6847821	title
Apocynaceae	Amsonia	Amsonia rigida		EOL	581401	title
Apocynaceae	Amsonia	Amsonia tabernaemontana		EOL	581404	title
Apocynaceae	Amsonia	Amsonia tabernaemontana var. salicifolia		EOL	1244798	title
Rosaceae	Amygdalus	Amygdalus nana		COL	20241132	synonym
Rosaceae	Amygdalus	Amygdalus nana		EOL	11521775	title
Anacampserotaceae	Anacampseros	Anacampseros comptonii		COL	20282421	accepted name
Anacampserotaceae	Anacampseros	Anacampseros filamentosa		COL	20282423	accepted name
Anacampserotaceae	Anacampseros	Anacampseros lanceolata		COL	20282429	accepted name
Anacampserotaceae	Anacampseros	Anacampseros rufescens		COL	20282435	accepted name
Anacampserotaceae	Anacampseros	Anacampseros telephiastrum		COL	20282440	accepted name
Anacampserotaceae	Anacampseros	Anacampseros australiana		COL	20282411	synonym
Anacampserotaceae	Anacampseros	Anacampseros namaquensis		COL	20282425	synonym
Anacampserotaceae	Anacampseros	Anacampseros tomentosa		COL	20282426	synonym
Anacampserotaceae	Anacampseros	Anacampseros filamentosa		EOL	5550473	title
Anacampserotaceae	Anacampseros	Anacampseros lanceolata		EOL	5550484	title
Anacampserotaceae	Anacampseros	Anacampseros rufescens		EOL	5550519	title
Anacampserotaceae	Anacampseros	Anacampseros telephiastrum		EOL	5550528	title
Anacampserotaceae	Anacampseros	Anacampseros australiana		EOL	5114408	title
Anacampserotaceae	Anacampseros	Anacampseros comptonii	NA	EOL	5550466	title
Anacampserotaceae	Anacampseros	Anacampseros namaquensis	NA	EOL	5550492	title
Anacampserotaceae	Anacampseros	Anacampseros tomentosa	NA	EOL	5550529	title
Anacardiaceae	Anacardium	Anacardium occidentale		COL	20254636	accepted name
Anacardiaceae	Anacardium	Anacardium occidentale		EOL	582263	title
Compositae	Anacyclus	Anacyclus clavatus		COL	17805387	provisionally accepted name
Compositae	Anacyclus	Anacyclus nigellifolius		COL	17812654	provisionally accepted name
Compositae	Anacyclus	Anacyclus pyrethrum		COL	17803006	provisionally accepted name
Compositae	Anacyclus	Anacyclus radiatus		COL	17829731	synonym
Compositae	Anacyclus	Anacyclus clavatus		EOL	474365	title
Compositae	Anacyclus	Anacyclus nigellifolius		EOL	6262794	title
Compositae	Anacyclus	Anacyclus pyrethrum		EOL	6262770	title
Compositae	Anacyclus	Anacyclus radiatus		EOL	6262809	title
Leguminosae	Anadenanthera	Anadenanthera peregrina		COL	11475022	accepted name
Leguminosae	Anadenanthera	Anadenanthera peregrina		EOL	638813	title
Primulaceae	Anagallis	Anagallis arvensis		COL	20287204	accepted name
Primulaceae	Anagallis	Anagallis foemina		COL	20287217	accepted name
Primulaceae	Anagallis	Anagallis monelli		COL	20287205	synonym
Primulaceae	Anagallis	Anagallis arvensis		EOL	583434	title
Primulaceae	Anagallis	Anagallis foemina		EOL	1276503	title
Primulaceae	Anagallis	Anagallis monelli		EOL	596847	title
Leguminosae	Anagyris	Anagyris foetida		COL	11471652	accepted name
Leguminosae	Anagyris	Anagyris foetida		EOL	702771	title
Leguminosae	Anagyris	Anagyris latifolia		EOL	6320802	title
Menispermaceae	Anamirta	Anamirta cocculus		COL	20203949	accepted name
Menispermaceae	Anamirta	Anamirta cocculus		EOL	5517145	title
Bromeliaceae	Ananas	Ananas comosus		COL	19073304	accepted name
Bromeliaceae	Ananas	Ananas bracteatus		COL	19073308	synonym
Bromeliaceae	Ananas	Ananas bracteatus		EOL	1126521	title
Bromeliaceae	Ananas	Ananas comosus		EOL	1126520	title
Compositae	Anaphalis	Anaphalis margaritacea		COL	0	Ambiguous (2)
Compositae	Anaphalis	Anaphalis alpicola		COL	17802833	provisionally accepted name
Compositae	Anaphalis	Anaphalis flaccida		COL	17795346	provisionally accepted name
Compositae	Anaphalis	Anaphalis lactea		COL	17812981	provisionally accepted name
Compositae	Anaphalis	Anaphalis sinica		COL	17820010	provisionally accepted name
Compositae	Anaphalis	Anaphalis triplinervis		COL	17816479	provisionally accepted name
Compositae	Anaphalis	Anaphalis flaccida		EOL	6237044	title
Compositae	Anaphalis	Anaphalis lactea		EOL	6237064	title
Compositae	Anaphalis	Anaphalis margaritacea		EOL	468228	title
Compositae	Anaphalis	Anaphalis sinica		EOL	6237125	title
Compositae	Anaphalis	Anaphalis triplinervis		EOL	2895822	title
Compositae	Anaphalis	Anaphalis alpicola	NA	EOL	6237000	title
Plantaginaceae	Anarrhinum	Anarrhinum bellidifolium		COL	20308191	accepted name
Plantaginaceae	Anarrhinum	Anarrhinum corsicum		COL	20308195	accepted name
Plantaginaceae	Anarrhinum	Anarrhinum bellidifolium		EOL	5675575	title
Plantaginaceae	Anarrhinum	Anarrhinum corsicum		EOL	5675580	title
Plantaginaceae	Anarrhinum	Anarrhinum forskahlii		EOL	5675586	title
Plantaginaceae	Anarrhinum	Anarrhinum forskahlii	Anarrhinum forskaohlii	COL	20308202	accepted name
Brassicaceae	Anastatica	Anastatica hierochuntica		COL	7143772	accepted name
Brassicaceae	Anastatica	Anastatica hierochuntica		EOL	2881790	title
[truncated: 42,188 more rows]
