# Supplementary material for: Integrating Biodiversity Data into Botanic Collections
Source: Biodivers Data J. 2016 May 20;(4):e7971. doi: 10.3897/BDJ.4.e7971 (PMC4910503; doi:10.3897/BDJ.4.e7971)
Supplement: Supplementary material 4 — Taxonomic name status - discrepancies between COL and TPL [file biodiversity_data_journal-4-e7971-s004.csv]

taxon	source1	source2	status1	status2
Sedum forsterianum subsp. elegans	EOL	TPL	Accepted	Synonym
Anaphalis margaritacea	COL	EOL	Ambiguous	Accepted
Anaphalis margaritacea	EOL	TPL	Accepted	Ambiguous
Dicranostigma franchetianum	COL	TPL	Synonym	Accepted
Dicranostigma franchetianum	EOL	TPL	Synonym	Accepted
Hypericum empetrifolium subsp. oliganthum	COL	EOL	Accepted	Synonym
Hypericum empetrifolium subsp. oliganthum	EOL	TPL	Synonym	Accepted
Armeria denticulata	COL	EOL	Ambiguous	Accepted
Armeria denticulata	EOL	TPL	Accepted	Ambiguous
Pelargonium drummondii	COL	TPL	Accepted	Unresolved
Pelargonium drummondii	EOL	TPL	Accepted	Unresolved
Rumex scutatus subsp. induratus	COL	EOL	Synonym	Accepted
Rumex scutatus subsp. induratus	COL	TPL	Synonym	Accepted
Iris humilis	COL	TPL	Accepted	Ambiguous
Iris humilis	EOL	TPL	Accepted	Ambiguous
Felicia amelloides	COL	TPL	Accepted	Ambiguous
Felicia amelloides	EOL	TPL	Accepted	Ambiguous
Dianthus hypanicus	COL	TPL	Accepted	Ambiguous
Dianthus hypanicus	EOL	TPL	Accepted	Ambiguous
Sedum anacampseros	COL	TPL	Synonym	Accepted
Sedum anacampseros	EOL	TPL	Synonym	Accepted
Cyathea australis	COL	TPL	Accepted	Unresolved
Cyathea australis	EOL	TPL	Accepted	Unresolved
Saxifraga rotundifolia subsp. rotundifolia	COL	EOL	Accepted	Synonym
Sagina micropetala	COL	EOL	Accepted	Synonym
Sagina micropetala	EOL	TPL	Synonym	Accepted
Aronia melanocarpa	COL	EOL	Synonym	Accepted
Aronia melanocarpa	COL	TPL	Synonym	Ambiguous
Aronia melanocarpa	EOL	TPL	Accepted	Ambiguous
Dianthus knappii	COL	EOL	Synonym	Accepted
Dianthus knappii	COL	TPL	Synonym	Accepted
Carlina acaulis	COL	TPL	Accepted	Ambiguous
Carlina acaulis	EOL	TPL	Accepted	Ambiguous
Pinus montezumae	COL	TPL	Accepted	Ambiguous
Pinus montezumae	EOL	TPL	Accepted	Ambiguous
Lophopyxis maingayi	COL	TPL	Accepted	Unresolved
Lophopyxis maingayi	EOL	TPL	Accepted	Unresolved
Amelanchier ovalis	COL	TPL	Accepted	Ambiguous
Amelanchier ovalis	EOL	TPL	Accepted	Ambiguous
Cyathea aspera	COL	TPL	Accepted	Synonym
Cyathea aspera	EOL	TPL	Accepted	Synonym
Atragene ochotensis	COL	EOL	Synonym	Accepted
Atragene ochotensis	EOL	TPL	Accepted	Synonym
Cerastium lucorum	EOL	TPL	Accepted	Synonym
Allamanda cathartica	COL	TPL	Accepted	Ambiguous
Allamanda cathartica	EOL	TPL	Accepted	Ambiguous
Digitalis laevigata	COL	TPL	Accepted	Ambiguous
Digitalis laevigata	EOL	TPL	Accepted	Ambiguous
Armeria maritima subsp. sibirica	EOL	TPL	Synonym	Accepted
Canavalia ensiformis	COL	TPL	Accepted	Ambiguous
Canavalia ensiformis	EOL	TPL	Accepted	Ambiguous
Deutzia crenata	COL	EOL	Accepted	Synonym
Deutzia crenata	EOL	TPL	Synonym	Accepted
Rosa iberica	COL	TPL	Accepted	Ambiguous
Rosa iberica	EOL	TPL	Accepted	Ambiguous
Alopecurus pratensis	COL	TPL	Accepted	Ambiguous
Alopecurus pratensis	EOL	TPL	Accepted	Ambiguous
Piptatherum virescens	COL	EOL	Accepted	Ambiguous
Piptatherum virescens	COL	TPL	Accepted	Ambiguous
Carlina lanata	COL	EOL	Ambiguous	Accepted
Carlina lanata	EOL	TPL	Accepted	Ambiguous
Allium spirale	COL	TPL	Accepted	Ambiguous
Allium spirale	EOL	TPL	Accepted	Ambiguous
Solidago multiradiata	COL	EOL	Ambiguous	Accepted
Solidago multiradiata	EOL	TPL	Accepted	Ambiguous
Sideritis cretica	COL	TPL	Accepted	Ambiguous
Sideritis cretica	EOL	TPL	Accepted	Ambiguous
Aquilegia dichroa	COL	EOL	Synonym	Accepted
Aquilegia dichroa	COL	TPL	Synonym	Accepted
Leucanthemum tridactylites	COL	TPL	Accepted	Ambiguous
Leucanthemum tridactylites	EOL	TPL	Accepted	Ambiguous
Genista versicolor	COL	TPL	Accepted	Ambiguous
Genista versicolor	EOL	TPL	Accepted	Ambiguous
Moltkia suffruticosa	COL	TPL	Accepted	Ambiguous
Moltkia suffruticosa	EOL	TPL	Accepted	Ambiguous
Achillea aspleniifolia	COL	TPL	Accepted	Ambiguous
Ocimum citriodorum	COL	EOL	Synonym	Ambiguous
Ocimum citriodorum	COL	TPL	Synonym	Unresolved
Ocimum citriodorum	EOL	TPL	Ambiguous	Unresolved
Eutrochium maculatum	COL	EOL	Synonym	Accepted
Eutrochium maculatum	COL	TPL	Synonym	Accepted
Euryops lateriflorus	COL	TPL	Accepted	Ambiguous
Euryops lateriflorus	EOL	TPL	Accepted	Ambiguous
Philadelphus intectus	COL	TPL	Synonym	Accepted
Philadelphus intectus	EOL	TPL	Synonym	Accepted
Solanum uporo	COL	TPL	Synonym	Unresolved
Solanum uporo	EOL	TPL	Synonym	Unresolved
Festuca calcarea	COL	EOL	Accepted	Ambiguous
Festuca calcarea	COL	TPL	Accepted	Ambiguous
Pulsatilla georgica	COL	TPL	Accepted	Synonym
Pulsatilla georgica	EOL	TPL	Accepted	Synonym
Carex nigra subsp. nigra	COL	TPL	Accepted	Synonym
Carex nigra subsp. nigra	EOL	TPL	Accepted	Synonym
Allium montanum	COL	EOL	Ambiguous	Synonym
Allium montanum	EOL	TPL	Synonym	Ambiguous
Diospyros kaki	COL	EOL	Accepted	Ambiguous
Diospyros kaki	EOL	TPL	Ambiguous	Accepted
Solanum cornutum	COL	TPL	Ambiguous	Synonym
Solanum cornutum	EOL	TPL	Ambiguous	Synonym
Crataegus nigra	COL	EOL	Accepted	Ambiguous
Crataegus nigra	COL	TPL	Accepted	Ambiguous
Thapsia nitida	COL	TPL	Accepted	Unresolved
Thapsia nitida	EOL	TPL	Accepted	Unresolved
Lecanopteris sinuosa	COL	TPL	Accepted	Synonym
Lecanopteris sinuosa	EOL	TPL	Accepted	Synonym
Fallopia aubertii	COL	EOL	Synonym	Accepted
Fallopia aubertii	COL	TPL	Synonym	Accepted
Fibigia lunarioides	COL	TPL	Accepted	Ambiguous
Fibigia lunarioides	EOL	TPL	Accepted	Ambiguous
Vicia tenuifolia	COL	TPL	Accepted	Ambiguous
Vicia tenuifolia	EOL	TPL	Accepted	Ambiguous
Paeonia coriacea	COL	EOL	Synonym	Accepted
Paeonia coriacea	COL	TPL	Synonym	Accepted
Silene olympica	COL	TPL	Accepted	Ambiguous
Silene olympica	EOL	TPL	Accepted	Ambiguous
Lycopus exaltatus	COL	TPL	Accepted	Ambiguous
Lycopus exaltatus	EOL	TPL	Accepted	Ambiguous
Helianthemum cretophilum	COL	TPL	Accepted	Unresolved
Brachypodium distachyon	COL	TPL	Accepted	Ambiguous
Brachypodium distachyon	EOL	TPL	Accepted	Ambiguous
Elaphoglossum pachycraspedon	EOL	TPL	Accepted	Unresolved
Potentilla rhenana	COL	TPL	Accepted	Ambiguous
Potentilla rhenana	EOL	TPL	Accepted	Ambiguous
Humulus japonicus	COL	EOL	Synonym	Accepted
Humulus japonicus	EOL	TPL	Accepted	Synonym
Quercus acuta	EOL	TPL	Accepted	Ambiguous
Cirsium arachnoideum	COL	EOL	Ambiguous	Accepted
Cirsium arachnoideum	EOL	TPL	Accepted	Ambiguous
Posoqueria latifolia	COL	EOL	Accepted	Synonym
Posoqueria latifolia	EOL	TPL	Synonym	Accepted
Limonium caspium	EOL	TPL	Accepted	Unresolved
Anthyllis alpestris	COL	TPL	Synonym	Ambiguous
Anthyllis alpestris	EOL	TPL	Synonym	Ambiguous
Carex crawei	COL	TPL	Accepted	Ambiguous
Carex crawei	EOL	TPL	Accepted	Ambiguous
Primula pallasii	COL	EOL	Synonym	Accepted
Primula pallasii	EOL	TPL	Accepted	Synonym
Geum virginianum	COL	EOL	Accepted	Ambiguous
Geum virginianum	COL	TPL	Accepted	Ambiguous
Hieracium bifidum	COL	EOL	Ambiguous	Accepted
Hieracium bifidum	EOL	TPL	Accepted	Ambiguous
Ptelea baldwinii	COL	EOL	Ambiguous	Synonym
Ptelea baldwinii	COL	TPL	Ambiguous	Accepted
Ptelea baldwinii	EOL	TPL	Synonym	Accepted
Dianthus amurensis	COL	EOL	Synonym	Ambiguous
Dianthus amurensis	EOL	TPL	Ambiguous	Synonym
Aconitum moldavicum	COL	EOL	Synonym	Accepted
Aconitum moldavicum	COL	TPL	Synonym	Accepted
Thalictrum rochebrunianum	COL	EOL	Accepted	Ambiguous
Potentilla tabernaemontani	COL	TPL	Accepted	Ambiguous
Potentilla tabernaemontani	EOL	TPL	Accepted	Ambiguous
Echinofossulocactus obvallatus	COL	TPL	Synonym	Unresolved
Echinofossulocactus obvallatus	EOL	TPL	Synonym	Unresolved
Festuca arundinacea	COL	TPL	Accepted	Ambiguous
Festuca arundinacea	EOL	TPL	Accepted	Ambiguous
Delosperma lehmannii	COL	EOL	Synonym	Accepted
Delosperma lehmannii	COL	TPL	Synonym	Ambiguous
Delosperma lehmannii	EOL	TPL	Accepted	Ambiguous
Cotoneaster floccosus	COL	EOL	Synonym	Accepted
Cotoneaster floccosus	COL	TPL	Synonym	Accepted
Cotoneaster acuminatus	COL	TPL	Accepted	Ambiguous
Cotoneaster acuminatus	EOL	TPL	Accepted	Ambiguous
Seseli gummiferum	COL	EOL	Ambiguous	Accepted
Seseli gummiferum	COL	TPL	Ambiguous	Accepted
Convolvulus siculus	COL	TPL	Accepted	Unresolved
Convolvulus siculus	EOL	TPL	Accepted	Unresolved
Frailea grahliana subsp. moseriana	COL	TPL	Synonym	Accepted
Luffa cylindrica	COL	EOL	Accepted	Synonym
Luffa cylindrica	EOL	TPL	Synonym	Accepted
Lavatera punctata	COL	EOL	Synonym	Accepted
Lavatera punctata	COL	TPL	Synonym	Accepted
Carex binervis	COL	TPL	Accepted	Ambiguous
Carex binervis	EOL	TPL	Accepted	Ambiguous
Antennaria parviflora	EOL	TPL	Synonym	Accepted
Chenopodium ambrosioides	COL	EOL	Ambiguous	Synonym
Chenopodium ambrosioides	COL	TPL	Ambiguous	Synonym
Rumex euxinus	COL	EOL	Synonym	Accepted
Rumex euxinus	EOL	TPL	Accepted	Synonym
Pterocarya pterocarpa	COL	EOL	Accepted	Synonym
Pterocarya pterocarpa	EOL	TPL	Synonym	Accepted
Justicia brandegeeana	COL	EOL	Accepted	Synonym
Justicia brandegeeana	EOL	TPL	Synonym	Accepted
Penstemon alpinus	COL	TPL	Synonym	Accepted
Penstemon alpinus	EOL	TPL	Synonym	Accepted
Cotoneaster cinerascens	COL	EOL	Synonym	Accepted
Cotoneaster cinerascens	COL	TPL	Synonym	Unresolved
Cotoneaster cinerascens	EOL	TPL	Accepted	Unresolved
Allium ascalonicum	COL	TPL	Accepted	Ambiguous
Allium ascalonicum	EOL	TPL	Accepted	Ambiguous
Shorea balangeran	COL	EOL	Synonym	Accepted
Shorea balangeran	COL	TPL	Synonym	Unresolved
Shorea balangeran	EOL	TPL	Accepted	Unresolved
Potentilla valderia	COL	TPL	Accepted	Ambiguous
Potentilla valderia	EOL	TPL	Accepted	Ambiguous
Cornus kousa	COL	TPL	Accepted	Ambiguous
Cornus kousa	EOL	TPL	Accepted	Ambiguous
Hieracium cydoniifolium	COL	EOL	Accepted	Ambiguous
Harrimanella stelleriana	COL	TPL	Accepted	Synonym
Cotoneaster hunanensis	EOL	TPL	Accepted	Unresolved
Saxifraga stellaris	COL	TPL	Synonym	Accepted
Saxifraga stellaris	EOL	TPL	Synonym	Accepted
Allium caeruleum	COL	TPL	Accepted	Ambiguous
Allium caeruleum	EOL	TPL	Accepted	Ambiguous
Aloe x spinosissima	EOL	TPL	Accepted	Unresolved
Anthemis maritima subsp. maritima	COL	TPL	Accepted	Synonym
Anthemis maritima subsp. maritima	EOL	TPL	Accepted	Synonym
Homalium minahassae	COL	TPL	Accepted	Unresolved
Euphorbia tithymaloides subsp. tithymaloides	COL	TPL	Accepted	Synonym
Euphorbia tithymaloides subsp. tithymaloides	EOL	TPL	Accepted	Synonym
Eriogonum jamesii var. jamesii	EOL	TPL	Accepted	Synonym
Arenaria procera	COL	EOL	Synonym	Accepted
Arenaria procera	EOL	TPL	Accepted	Synonym
Macropiper excelsum	COL	TPL	Accepted	Unresolved
Macropiper excelsum	EOL	TPL	Accepted	Unresolved
Rhus lancea	COL	EOL	Ambiguous	Synonym
Rhus lancea	COL	TPL	Ambiguous	Synonym
Euphorbia cyathophora	COL	EOL	Synonym	Accepted
Euphorbia cyathophora	COL	TPL	Synonym	Accepted
Collinsia bicolor	COL	EOL	Synonym	Accepted
Collinsia bicolor	COL	TPL	Synonym	Ambiguous
Collinsia bicolor	EOL	TPL	Accepted	Ambiguous
Acacia karroo	COL	EOL	Accepted	Ambiguous
Acacia karroo	EOL	TPL	Ambiguous	Accepted
Rhamnus saxatilis subsp. saxatilis	COL	EOL	Accepted	Synonym
Stenocactus crispatus	COL	EOL	Accepted	Ambiguous
Stenocactus crispatus	EOL	TPL	Ambiguous	Accepted
Helianthemum pilosum	COL	TPL	Accepted	Synonym
Helianthemum pilosum	EOL	TPL	Accepted	Synonym
Aegilops cylindrica	COL	TPL	Accepted	Ambiguous
Aegilops cylindrica	EOL	TPL	Accepted	Ambiguous
Faucaria tuberculosa	COL	TPL	Accepted	Unresolved
Faucaria tuberculosa	EOL	TPL	Accepted	Unresolved
Mutellina adonidifolia	EOL	TPL	Accepted	Unresolved
Scrophularia balbisii	COL	TPL	Accepted	Ambiguous
Scrophularia balbisii	EOL	TPL	Accepted	Ambiguous
Prunus salicifolia	COL	EOL	Synonym	Accepted
Prunus salicifolia	COL	TPL	Synonym	Accepted
Crataegus x lavallei	COL	TPL	Synonym	Accepted
Crataegus x lavallei	EOL	TPL	Synonym	Accepted
Acaena pallida	COL	TPL	Accepted	Ambiguous
Acaena pallida	EOL	TPL	Accepted	Ambiguous
Bellevalia romana	COL	TPL	Accepted	Ambiguous
Bellevalia romana	EOL	TPL	Accepted	Ambiguous
Synadenium grantii	COL	EOL	Synonym	Ambiguous
Synadenium grantii	EOL	TPL	Ambiguous	Synonym
Potentilla hirta subsp. pedata	COL	EOL	Synonym	Accepted
Potentilla hirta subsp. pedata	EOL	TPL	Accepted	Synonym
Knema laurina	COL	TPL	Accepted	Unresolved
Knema laurina	EOL	TPL	Accepted	Unresolved
Artemisia marschalliana	EOL	TPL	Ambiguous	Synonym
Swertia iberica	COL	TPL	Accepted	Unresolved
Swertia iberica	EOL	TPL	Accepted	Unresolved
Convolvulus persicus	COL	TPL	Accepted	Unresolved
Convolvulus persicus	EOL	TPL	Accepted	Unresolved
Carex echinata	COL	TPL	Accepted	Ambiguous
Carex echinata	EOL	TPL	Accepted	Ambiguous
Cremanthodium ellisii	COL	TPL	Accepted	Ambiguous
Cremanthodium ellisii	EOL	TPL	Accepted	Ambiguous
Sedum aizoon	COL	TPL	Synonym	Accepted
Sedum aizoon	EOL	TPL	Synonym	Accepted
Flemingia strobilifera	COL	TPL	Accepted	Ambiguous
Flemingia strobilifera	EOL	TPL	Accepted	Ambiguous
Veronica porphyriana	COL	TPL	Synonym	Accepted
Armeria maritima subsp. andina	COL	EOL	Synonym	Accepted
Armeria maritima subsp. andina	COL	TPL	Synonym	Ambiguous
Armeria maritima subsp. andina	EOL	TPL	Accepted	Ambiguous
Tillandsia juncea	COL	TPL	Accepted	Ambiguous
Tillandsia juncea	EOL	TPL	Accepted	Ambiguous
Ribes petraeum	COL	TPL	Accepted	Ambiguous
Ribes petraeum	EOL	TPL	Accepted	Ambiguous
Asplenium nidus	COL	EOL	Accepted	Synonym
Asplenium nidus	EOL	TPL	Synonym	Accepted
Cotoneaster rugosus	COL	EOL	Synonym	Accepted
Cotoneaster rugosus	COL	TPL	Synonym	Accepted
Anemia flexuosa	COL	EOL	Accepted	Synonym
Anemia flexuosa	EOL	TPL	Synonym	Accepted
Crassula coccinea	COL	EOL	Accepted	Synonym
Crassula coccinea	EOL	TPL	Synonym	Accepted
Cotoneaster radicans	COL	EOL	Synonym	Accepted
Cotoneaster radicans	COL	TPL	Synonym	Accepted
Centaurea granatensis	COL	TPL	Accepted	Ambiguous
Centaurea granatensis	EOL	TPL	Accepted	Ambiguous
Cotoneaster ichangensis	EOL	TPL	Accepted	Unresolved
Valerianella locusta f. carinata	COL	EOL	Synonym	Accepted
Atragene sibirica	COL	EOL	Synonym	Accepted
Atragene sibirica	EOL	TPL	Accepted	Synonym
Pulsatilla alpina subsp. alpicola	COL	EOL	Synonym	Accepted
Crepis alpestris	COL	TPL	Accepted	Ambiguous
Crepis alpestris	EOL	TPL	Accepted	Ambiguous
Epilobium tetragonum	COL	TPL	Accepted	Ambiguous
Epilobium tetragonum	EOL	TPL	Accepted	Ambiguous
Eryngium planum	COL	TPL	Accepted	Ambiguous
Eryngium planum	EOL	TPL	Accepted	Ambiguous
Crataegus caucasica	COL	TPL	Accepted	Unresolved
Crataegus caucasica	EOL	TPL	Accepted	Unresolved
Schotia latifolia	COL	TPL	Accepted	Ambiguous
Schotia latifolia	EOL	TPL	Accepted	Ambiguous
Centaurea sulphurea	COL	TPL	Accepted	Ambiguous
Centaurea sulphurea	EOL	TPL	Accepted	Ambiguous
Dracocephalum botryoides	COL	TPL	Accepted	Ambiguous
Dracocephalum botryoides	EOL	TPL	Accepted	Ambiguous
Melandrium balansae	COL	EOL	Synonym	Accepted
Melandrium balansae	EOL	TPL	Accepted	Synonym
Rosa persica	COL	TPL	Accepted	Ambiguous
Rosa persica	EOL	TPL	Accepted	Ambiguous
Pyracantha rogersiana	COL	EOL	Synonym	Accepted
Pyracantha rogersiana	COL	TPL	Synonym	Ambiguous
Pyracantha rogersiana	EOL	TPL	Accepted	Ambiguous
Copiapoa humilis	COL	TPL	Accepted	Ambiguous
Copiapoa humilis	EOL	TPL	Accepted	Ambiguous
Rudbeckia flava	COL	TPL	Accepted	Ambiguous
Rudbeckia flava	EOL	TPL	Accepted	Ambiguous
Inula spiraeifolia	COL	TPL	Accepted	Ambiguous
Inula spiraeifolia	EOL	TPL	Accepted	Ambiguous
Tradescantia zebrina	COL	EOL	Accepted	Ambiguous
Tradescantia zebrina	COL	TPL	Accepted	Ambiguous
Polygonum perfoliatum	EOL	TPL	Synonym	Accepted
Picris hieracioides	COL	EOL	Ambiguous	Accepted
Picris hieracioides	EOL	TPL	Accepted	Ambiguous
Sedum sediforme	COL	EOL	Ambiguous	Accepted
Sedum sediforme	COL	TPL	Ambiguous	Accepted
Gaura lindheimeri	COL	TPL	Synonym	Accepted
Gaura lindheimeri	EOL	TPL	Synonym	Accepted
Saxifraga virginiensis	COL	TPL	Synonym	Accepted
Saxifraga virginiensis	EOL	TPL	Synonym	Accepted
Acanthus ilicifolius	COL	TPL	Accepted	Ambiguous
Acanthus ilicifolius	EOL	TPL	Accepted	Ambiguous
Rosa glauca	COL	TPL	Accepted	Ambiguous
Rosa glauca	EOL	TPL	Accepted	Ambiguous
Nepeta parviflora	COL	EOL	Ambiguous	Accepted
Nepeta parviflora	EOL	TPL	Accepted	Ambiguous
Lavatera arborea	COL	EOL	Synonym	Accepted
Lavatera arborea	EOL	TPL	Accepted	Synonym
Draba lasiocarpa	COL	TPL	Accepted	Ambiguous
Draba lasiocarpa	EOL	TPL	Accepted	Ambiguous
Phlomis taurica	COL	EOL	Synonym	Accepted
Phlomis taurica	EOL	TPL	Accepted	Synonym
Primula macrocalyx	COL	EOL	Synonym	Accepted
Primula macrocalyx	EOL	TPL	Accepted	Synonym
Acacia saligna	COL	TPL	Accepted	Ambiguous
Acacia saligna	EOL	TPL	Accepted	Ambiguous
Sorbus lancifolia	COL	TPL	Accepted	Unresolved
Sorbus lancifolia	EOL	TPL	Accepted	Unresolved
Saponaria persica	COL	TPL	Synonym	Unresolved
Quercus pyrenaica	COL	TPL	Accepted	Ambiguous
Quercus pyrenaica	EOL	TPL	Accepted	Ambiguous
Acer semenovii	COL	EOL	Synonym	Accepted
Acer semenovii	EOL	TPL	Accepted	Synonym
Acaena saccaticupula	COL	TPL	Accepted	Unresolved
Acaena saccaticupula	EOL	TPL	Accepted	Unresolved
Cedrela odorata	COL	TPL	Accepted	Ambiguous
Cedrela odorata	EOL	TPL	Accepted	Ambiguous
Artocarpus camansi	COL	EOL	Synonym	Accepted
Artocarpus camansi	COL	TPL	Synonym	Accepted
Cotoneaster moupinensis	COL	TPL	Accepted	Ambiguous
Cotoneaster moupinensis	EOL	TPL	Accepted	Ambiguous
Euphorbia pendula	EOL	TPL	Accepted	Ambiguous
Gomphrena decumbens	COL	TPL	Synonym	Ambiguous
Gomphrena decumbens	EOL	TPL	Synonym	Ambiguous
Dryopteris oreades	COL	TPL	Accepted	Unresolved
Dryopteris oreades	EOL	TPL	Accepted	Unresolved
Acer barbinerve	COL	TPL	Accepted	Ambiguous
Acer barbinerve	EOL	TPL	Accepted	Ambiguous
Mahonia bealei	COL	TPL	Synonym	Ambiguous
Mahonia bealei	EOL	TPL	Synonym	Ambiguous
Ptilostemon gnaphaloides subsp. gnaphaloides	COL	TPL	Accepted	Synonym
Ptilostemon gnaphaloides subsp. gnaphaloides	EOL	TPL	Accepted	Synonym
Osmundastrum claytonianum	COL	EOL	Accepted	Synonym
Osmundastrum claytonianum	COL	TPL	Accepted	Synonym
Cotoneaster kongboensis	COL	EOL	Synonym	Accepted
Cotoneaster kongboensis	COL	TPL	Synonym	Accepted
Cyclamen elegans	COL	EOL	Synonym	Accepted
Cyclamen elegans	EOL	TPL	Accepted	Synonym
Iris filifolia	COL	TPL	Accepted	Ambiguous
Iris filifolia	EOL	TPL	Accepted	Ambiguous
Linaria dalmatica	COL	EOL	Accepted	Ambiguous
Linaria dalmatica	EOL	TPL	Ambiguous	Accepted
Hieracium anglicum	COL	TPL	Accepted	Ambiguous
Hieracium anglicum	EOL	TPL	Accepted	Ambiguous
Mammillaria mollendorffiana	COL	EOL	Synonym	Accepted
Mammillaria mollendorffiana	EOL	TPL	Accepted	Synonym
Gaultheria miqueliana	COL	EOL	Accepted	Synonym
Gaultheria miqueliana	COL	TPL	Accepted	Synonym
Halosarcia pergranulata	EOL	TPL	Ambiguous	Accepted
Nigella ciliaris	COL	TPL	Accepted	Unresolved
Nigella ciliaris	EOL	TPL	Accepted	Unresolved
Anacampseros tomentosa	COL	EOL	Synonym	Accepted
Anacampseros tomentosa	COL	TPL	Synonym	Ambiguous
Anacampseros tomentosa	EOL	TPL	Accepted	Ambiguous
Juncus compressus	COL	TPL	Accepted	Ambiguous
Juncus compressus	EOL	TPL	Accepted	Ambiguous
Withania riebeckii	COL	TPL	Accepted	Unresolved
Withania riebeckii	EOL	TPL	Accepted	Unresolved
Laserpitium peucedanoides	COL	EOL	Ambiguous	Accepted
Laserpitium peucedanoides	EOL	TPL	Accepted	Ambiguous
Aposeris foetida	COL	TPL	Accepted	Ambiguous
Aposeris foetida	EOL	TPL	Accepted	Ambiguous
Tremastelma palaestinum	COL	EOL	Synonym	Accepted
Tremastelma palaestinum	EOL	TPL	Accepted	Synonym
Pentaphalangium latissimum	EOL	TPL	Synonym	Unresolved
Physocarpus malvaceus	COL	EOL	Accepted	Ambiguous
Physocarpus malvaceus	COL	TPL	Accepted	Ambiguous
Galium scabrum	COL	TPL	Accepted	Ambiguous
Galium scabrum	EOL	TPL	Accepted	Ambiguous
Myrmecodia echinata	COL	EOL	Synonym	Accepted
Myrmecodia echinata	EOL	TPL	Accepted	Synonym
Galium carpaticum	EOL	TPL	Accepted	Synonym
Potentilla heptaphylla	COL	EOL	Accepted	Ambiguous
Potentilla heptaphylla	COL	TPL	Accepted	Ambiguous
Gentiana triflora var. japonica	EOL	TPL	Accepted	Synonym
Cyclamen africanum	COL	EOL	Synonym	Accepted
Cyclamen africanum	COL	TPL	Synonym	Accepted
Lavandula pinnata	COL	TPL	Accepted	Ambiguous
Lavandula pinnata	EOL	TPL	Accepted	Ambiguous
Rhododendron makinoi	COL	TPL	Accepted	Ambiguous
Rhododendron makinoi	EOL	TPL	Accepted	Ambiguous
Aster tataricus	COL	TPL	Accepted	Ambiguous
Aster tataricus	EOL	TPL	Accepted	Ambiguous
Opuntia erinacea	COL	EOL	Synonym	Accepted
Opuntia erinacea	COL	TPL	Synonym	Accepted
Convolvulus cneorum	COL	TPL	Accepted	Unresolved
Convolvulus cneorum	EOL	TPL	Accepted	Unresolved
Hordeum distichon var. nutans	COL	EOL	Synonym	Accepted
Euphorbia glaberrima	COL	TPL	Accepted	Ambiguous
Euphorbia glaberrima	EOL	TPL	Accepted	Ambiguous
Lupinus hartwegii	COL	EOL	Accepted	Ambiguous
Lupinus hartwegii	EOL	TPL	Ambiguous	Accepted
Vicia sativa subsp. cordata	COL	TPL	Accepted	Ambiguous
Vicia sativa subsp. cordata	EOL	TPL	Accepted	Ambiguous
Viola calcarata subsp. zoysii	COL	EOL	Synonym	Accepted
Viola calcarata subsp. zoysii	COL	TPL	Synonym	Accepted
Hieracium schmidtii	COL	TPL	Accepted	Ambiguous
Hieracium schmidtii	EOL	TPL	Accepted	Ambiguous
Pyrus caucasica	COL	EOL	Synonym	Accepted
Pyrus caucasica	COL	TPL	Synonym	Accepted
Primula apennina	COL	EOL	Synonym	Accepted
Primula apennina	COL	TPL	Synonym	Accepted
Pellaea viridis	COL	EOL	Synonym	Accepted
Pellaea viridis	COL	TPL	Synonym	Accepted
Allium komarovianum	COL	EOL	Synonym	Accepted
Allium komarovianum	EOL	TPL	Accepted	Synonym
Polemonium laxiflorum	COL	EOL	Synonym	Accepted
Polemonium laxiflorum	EOL	TPL	Accepted	Synonym
Cistanthe grandiflora	COL	TPL	Accepted	Ambiguous
Cistanthe grandiflora	EOL	TPL	Accepted	Ambiguous
Rehmannia angulata	COL	EOL	Synonym	Accepted
Rehmannia angulata	EOL	TPL	Accepted	Synonym
Dasiphora phyllocalyx	COL	EOL	Synonym	Accepted
Dasiphora phyllocalyx	COL	TPL	Synonym	Unresolved
Dasiphora phyllocalyx	EOL	TPL	Accepted	Unresolved
Carica quercifolia	EOL	TPL	Synonym	Accepted
Kalanchoe synsepala	COL	EOL	Accepted	Synonym
Kalanchoe synsepala	EOL	TPL	Synonym	Accepted
Galeopsis angustifolia	COL	EOL	Synonym	Accepted
Galeopsis angustifolia	EOL	TPL	Accepted	Synonym
Haloragis alata	COL	TPL	Synonym	Unresolved
Cotoneaster genitianus	EOL	TPL	Accepted	Ambiguous
Berberis giraldii	COL	TPL	Synonym	Accepted
Berberis giraldii	EOL	TPL	Synonym	Accepted
Palisota barteri	COL	TPL	Accepted	Ambiguous
Palisota barteri	EOL	TPL	Accepted	Ambiguous
Acaena microphylla	EOL	TPL	Accepted	Ambiguous
Eupatorium purpureum	COL	EOL	Accepted	Synonym
Eupatorium purpureum	COL	TPL	Accepted	Ambiguous
Eupatorium purpureum	EOL	TPL	Synonym	Ambiguous
Viburnum awabuki	EOL	TPL	Accepted	Synonym
Tecoma sambucifolia	COL	EOL	Synonym	Accepted
Tecoma sambucifolia	EOL	TPL	Accepted	Synonym
Nicotiana glutinosa	COL	EOL	Accepted	Ambiguous
Nicotiana glutinosa	EOL	TPL	Ambiguous	Accepted
Dryas tenella	COL	EOL	Synonym	Accepted
Dryas tenella	COL	TPL	Synonym	Unresolved
Dryas tenella	EOL	TPL	Accepted	Unresolved
Solanum pyracanthum	COL	TPL	Synonym	Unresolved
Solanum pyracanthum	EOL	TPL	Synonym	Unresolved
Centaurea nigra	COL	TPL	Accepted	Ambiguous
Centaurea nigra	EOL	TPL	Accepted	Ambiguous
Kniphofia rufa	EOL	TPL	Synonym	Ambiguous
Asparagus falcatus	COL	TPL	Accepted	Ambiguous
Asparagus falcatus	EOL	TPL	Accepted	Ambiguous
Lophophora fricii	COL	EOL	Accepted	Ambiguous
Lophophora fricii	COL	TPL	Accepted	Unresolved
Lophophora fricii	EOL	TPL	Ambiguous	Unresolved
Pulsatilla flavescens	COL	EOL	Synonym	Accepted
Pulsatilla flavescens	EOL	TPL	Accepted	Synonym
Madia elegans	COL	TPL	Accepted	Ambiguous
Madia elegans	EOL	TPL	Accepted	Ambiguous
Juniperus conferta	COL	EOL	Synonym	Accepted
Juniperus conferta	EOL	TPL	Accepted	Synonym
Photinia serrulata	COL	EOL	Synonym	Ambiguous
Photinia serrulata	COL	TPL	Synonym	Ambiguous
Acer grosseri var. hersii	EOL	TPL	Accepted	Unresolved
Gypsophila petraea	COL	TPL	Accepted	Ambiguous
Gypsophila petraea	EOL	TPL	Accepted	Ambiguous
Phyllanthus grandifolius	COL	TPL	Accepted	Ambiguous
Phyllanthus grandifolius	EOL	TPL	Accepted	Ambiguous
Cotoneaster minutus	COL	TPL	Accepted	Unresolved
Cotoneaster minutus	EOL	TPL	Accepted	Unresolved
Scorzonera austriaca	COL	TPL	Accepted	Ambiguous
Scorzonera austriaca	EOL	TPL	Accepted	Ambiguous
Alchemilla acutiloba	COL	EOL	Ambiguous	Accepted
Alchemilla acutiloba	EOL	TPL	Accepted	Ambiguous
Cerasus besseyi	COL	EOL	Synonym	Accepted
Cerasus besseyi	COL	TPL	Synonym	Ambiguous
Cerasus besseyi	EOL	TPL	Accepted	Ambiguous
Fragaria viridis	COL	TPL	Accepted	Ambiguous
Fragaria viridis	EOL	TPL	Accepted	Ambiguous
Cotoneaster bilokonii	EOL	TPL	Accepted	Unresolved
Heracleum sosnowskyi	COL	TPL	Accepted	Unresolved
Heracleum sosnowskyi	EOL	TPL	Accepted	Unresolved
Hypochaeris radicata	COL	TPL	Accepted	Unresolved
Hypochaeris radicata	EOL	TPL	Accepted	Unresolved
Cotoneaster kaschkarovii	EOL	TPL	Accepted	Unresolved
Campanula cochleariifolia	COL	TPL	Accepted	Ambiguous
Campanula cochleariifolia	EOL	TPL	Accepted	Ambiguous
Potentilla indica	COL	EOL	Accepted	Synonym
Potentilla indica	COL	TPL	Accepted	Unresolved
Potentilla indica	EOL	TPL	Synonym	Unresolved
Psilotum nudum	COL	EOL	Accepted	Ambiguous
Psilotum nudum	EOL	TPL	Ambiguous	Accepted
Festuca amethystina	COL	TPL	Accepted	Ambiguous
Festuca amethystina	EOL	TPL	Accepted	Ambiguous
Seseli hippomarathrum	COL	EOL	Ambiguous	Accepted
Seseli hippomarathrum	COL	TPL	Ambiguous	Accepted
Pimpinella saxifraga	COL	EOL	Ambiguous	Accepted
Pimpinella saxifraga	COL	TPL	Ambiguous	Accepted
Athyrium niponicum	COL	EOL	Synonym	Accepted
Athyrium niponicum	EOL	TPL	Accepted	Synonym
Solidago virgaurea	COL	TPL	Accepted	Ambiguous
Solidago virgaurea	EOL	TPL	Accepted	Ambiguous
Sedum montanum	COL	EOL	Ambiguous	Accepted
Sedum montanum	EOL	TPL	Accepted	Ambiguous
Salix babylonica	COL	EOL	Accepted	Synonym
Salix babylonica	EOL	TPL	Synonym	Accepted
Salvia lavandulifolia	COL	EOL	Synonym	Accepted
Salvia lavandulifolia	EOL	TPL	Accepted	Synonym
Salix retusa	COL	TPL	Accepted	Ambiguous
Salix retusa	EOL	TPL	Accepted	Ambiguous
Viburnum rigidum	COL	EOL	Synonym	Accepted
Viburnum rigidum	EOL	TPL	Accepted	Synonym
Haworthia angustifolia var. liliputana	COL	EOL	Synonym	Ambiguous
Haworthia angustifolia var. liliputana	EOL	TPL	Ambiguous	Synonym
Amaranthus blitum	COL	TPL	Accepted	Ambiguous
Amaranthus blitum	EOL	TPL	Accepted	Ambiguous
Plantago altissima	COL	EOL	Accepted	Synonym
Plantago altissima	EOL	TPL	Synonym	Accepted
Cirsium spinosissimum	COL	TPL	Accepted	Ambiguous
Cirsium spinosissimum	EOL	TPL	Accepted	Ambiguous
Crataegus pedicellata var. ellwangeriana	COL	TPL	Synonym	Accepted
Crataegus pedicellata var. ellwangeriana	EOL	TPL	Synonym	Accepted
Celtis australis	COL	EOL	Accepted	Synonym
Celtis australis	EOL	TPL	Synonym	Accepted
Rumex maritimus	COL	EOL	Accepted	Synonym
Rumex maritimus	EOL	TPL	Synonym	Accepted
Polypodium macaronesicum	COL	EOL	Synonym	Accepted
Polypodium macaronesicum	COL	TPL	Synonym	Unresolved
Polypodium macaronesicum	EOL	TPL	Accepted	Unresolved
Cotoneaster albokermesinus	COL	EOL	Synonym	Accepted
Cotoneaster albokermesinus	COL	TPL	Synonym	Accepted
Marrubium supinum	COL	TPL	Accepted	Ambiguous
Marrubium supinum	EOL	TPL	Accepted	Ambiguous
Globularia valentina	COL	EOL	Accepted	Synonym
Globularia valentina	EOL	TPL	Synonym	Accepted
Rhaponticum carthamoides	COL	EOL	Accepted	Ambiguous
Rhaponticum carthamoides	EOL	TPL	Ambiguous	Accepted
Limonium binervosum	COL	EOL	Ambiguous	Accepted
Limonium binervosum	COL	TPL	Ambiguous	Accepted
Pinus nigra	COL	EOL	Accepted	Ambiguous
Pinus nigra	COL	TPL	Accepted	Ambiguous
Callicarpa longissima	COL	EOL	Synonym	Accepted
Callicarpa longissima	COL	TPL	Synonym	Accepted
Moricandia nitens	COL	TPL	Accepted	Ambiguous
Moricandia nitens	EOL	TPL	Accepted	Ambiguous
Stenocactus phyllacanthus	COL	EOL	Accepted	Synonym
Stenocactus phyllacanthus	EOL	TPL	Synonym	Accepted
Amygdalus nana	COL	EOL	Synonym	Accepted
Amygdalus nana	COL	TPL	Synonym	Ambiguous
Amygdalus nana	EOL	TPL	Accepted	Ambiguous
Ephedra altissima	COL	TPL	Accepted	Ambiguous
Ephedra altissima	EOL	TPL	Accepted	Ambiguous
Paeonia caucasica	COL	EOL	Synonym	Accepted
Paeonia caucasica	EOL	TPL	Accepted	Synonym
Humata pyxidata	COL	EOL	Synonym	Accepted
Humata pyxidata	COL	TPL	Synonym	Accepted
Ochna kirkii	COL	EOL	Accepted	Synonym
Ochna kirkii	COL	TPL	Accepted	Unresolved
Ochna kirkii	EOL	TPL	Synonym	Unresolved
Cerastium alpinum	COL	EOL	Accepted	Synonym
Cerastium alpinum	COL	TPL	Accepted	Ambiguous
Cerastium alpinum	EOL	TPL	Synonym	Ambiguous
Terminalia okari	COL	TPL	Synonym	Unresolved
Petasites albus	COL	TPL	Accepted	Ambiguous
Petasites albus	EOL	TPL	Accepted	Ambiguous
Hordeum secalinum	COL	TPL	Accepted	Ambiguous
Hordeum secalinum	EOL	TPL	Accepted	Ambiguous
Polystichum wilsonii	COL	TPL	Synonym	Accepted
Polystichum wilsonii	EOL	TPL	Synonym	Accepted
Spiraea expansa	COL	TPL	Synonym	Ambiguous
Spiraea expansa	EOL	TPL	Synonym	Ambiguous
Gentiana saxosa	COL	EOL	Ambiguous	Accepted
Gentiana saxosa	COL	TPL	Ambiguous	Synonym
Gentiana saxosa	EOL	TPL	Accepted	Synonym
Catalpa bungei	COL	TPL	Accepted	Ambiguous
Catalpa bungei	EOL	TPL	Accepted	Ambiguous
Gynura aurantiaca	COL	TPL	Accepted	Ambiguous
Gynura aurantiaca	EOL	TPL	Accepted	Ambiguous
Fragaria vesca	COL	TPL	Accepted	Ambiguous
Fragaria vesca	EOL	TPL	Accepted	Ambiguous
Senecio sarracenicus	COL	TPL	Accepted	Ambiguous
Senecio sarracenicus	EOL	TPL	Accepted	Ambiguous
Primula veris subsp. columnae	COL	EOL	Synonym	Accepted
Primula veris subsp. columnae	EOL	TPL	Accepted	Synonym
Gentiana orbicularis	COL	EOL	Synonym	Accepted
Gentiana orbicularis	COL	TPL	Synonym	Unresolved
Gentiana orbicularis	EOL	TPL	Accepted	Unresolved
Clematis pitcheri	COL	TPL	Accepted	Ambiguous
Clematis pitcheri	EOL	TPL	Accepted	Ambiguous
Crepis pulchra	COL	TPL	Accepted	Ambiguous
Crepis pulchra	EOL	TPL	Accepted	Ambiguous
Thymus odoratissimus	COL	TPL	Accepted	Ambiguous
Thymus odoratissimus	EOL	TPL	Accepted	Ambiguous
Ornithogalum conicum	COL	EOL	Accepted	Ambiguous
Ornithogalum conicum	COL	TPL	Accepted	Ambiguous
Lathyrus pannonicus subsp. collinus	COL	TPL	Accepted	Ambiguous
Lathyrus pannonicus subsp. collinus	EOL	TPL	Accepted	Ambiguous
Allium flavum	COL	TPL	Accepted	Ambiguous
Allium flavum	EOL	TPL	Accepted	Ambiguous
Rosa davurica	COL	TPL	Accepted	Ambiguous
Rosa davurica	EOL	TPL	Accepted	Ambiguous
Amaranthus hybridus	COL	TPL	Accepted	Ambiguous
Amaranthus hybridus	EOL	TPL	Accepted	Ambiguous
Spiraea alba	COL	TPL	Accepted	Ambiguous
Spiraea alba	EOL	TPL	Accepted	Ambiguous
Peperomia tithymaloides	COL	EOL	Synonym	Accepted
Peperomia tithymaloides	COL	TPL	Synonym	Accepted
Gasteria liliputana	COL	EOL	Synonym	Ambiguous
Gasteria liliputana	EOL	TPL	Ambiguous	Synonym
Cephalaria transsylvanica	COL	TPL	Accepted	Unresolved
Cephalaria transsylvanica	EOL	TPL	Accepted	Unresolved
Rosa virginiana	COL	TPL	Accepted	Ambiguous
Rosa virginiana	EOL	TPL	Accepted	Ambiguous
Carduus acanthoides	COL	TPL	Accepted	Ambiguous
Carduus acanthoides	EOL	TPL	Accepted	Ambiguous
Carex sylvatica	COL	TPL	Accepted	Ambiguous
Carex sylvatica	EOL	TPL	Accepted	Ambiguous
Dodecatheon clevelandii subsp. insulare	COL	EOL	Accepted	Synonym
Dodecatheon clevelandii subsp. insulare	EOL	TPL	Synonym	Accepted
Campanula collina	COL	TPL	Accepted	Ambiguous
Campanula collina	EOL	TPL	Accepted	Ambiguous
Asclepias linifolia	COL	TPL	Synonym	Ambiguous
Asclepias linifolia	EOL	TPL	Synonym	Ambiguous
Abies concolor var. concolor	EOL	TPL	Accepted	Synonym
Hieracium caespitosum	COL	TPL	Synonym	Ambiguous
Hieracium caespitosum	EOL	TPL	Synonym	Ambiguous
Diospyros lotus	COL	TPL	Accepted	Ambiguous
Diospyros lotus	EOL	TPL	Accepted	Ambiguous
Adonis pyrenaica	COL	EOL	Accepted	Synonym
Adonis pyrenaica	COL	TPL	Accepted	Ambiguous
Adonis pyrenaica	EOL	TPL	Synonym	Ambiguous
Luzula multiflora subsp. frigida	EOL	TPL	Synonym	Ambiguous
Huernia macrocarpa	COL	TPL	Accepted	Ambiguous
Huernia macrocarpa	EOL	TPL	Accepted	Ambiguous
Mentha longifolia	COL	EOL	Accepted	Ambiguous
Mentha longifolia	COL	TPL	Accepted	Ambiguous
Rosa jacutica	COL	EOL	Synonym	Accepted
Rosa jacutica	COL	TPL	Synonym	Accepted
Aubrieta deltoidea	COL	TPL	Accepted	Ambiguous
Aubrieta deltoidea	EOL	TPL	Accepted	Ambiguous
Glochidion obscurum	COL	EOL	Synonym	Accepted
Glochidion obscurum	COL	TPL	Synonym	Accepted
Cyphomandra abutiloides	COL	TPL	Synonym	Unresolved
Cyphomandra abutiloides	EOL	TPL	Synonym	Unresolved
Cotoneaster logginovae	EOL	TPL	Accepted	Unresolved
Sorbus rupicola	COL	TPL	Accepted	Ambiguous
Sorbus rupicola	EOL	TPL	Accepted	Ambiguous
Cotoneaster suavis	COL	TPL	Synonym	Ambiguous
Cotoneaster suavis	EOL	TPL	Synonym	Ambiguous
Pittosporum moluccanum	COL	TPL	Accepted	Unresolved
Pittosporum moluccanum	EOL	TPL	Accepted	Unresolved
Lupinus angustifolius	COL	TPL	Accepted	Ambiguous
Lupinus angustifolius	EOL	TPL	Accepted	Ambiguous
Cotoneaster niger	COL	TPL	Accepted	Ambiguous
Cotoneaster niger	EOL	TPL	Accepted	Ambiguous
Verbascum bombyciferum	COL	TPL	Accepted	Ambiguous
Verbascum bombyciferum	EOL	TPL	Accepted	Ambiguous
Acacia leprosa	COL	TPL	Accepted	Ambiguous
Acacia leprosa	EOL	TPL	Accepted	Ambiguous
Camellia reticulata	COL	EOL	Accepted	Synonym
Camellia reticulata	EOL	TPL	Synonym	Accepted
Rosa nutkana var. hispida	COL	EOL	Accepted	Ambiguous
Rosa nutkana var. hispida	COL	TPL	Accepted	Synonym
Rosa nutkana var. hispida	EOL	TPL	Ambiguous	Synonym
Mediolobivia ritteri	COL	TPL	Synonym	Unresolved
Mediolobivia ritteri	EOL	TPL	Synonym	Unresolved
Centaurea nervosa	COL	TPL	Accepted	Ambiguous
Centaurea nervosa	EOL	TPL	Accepted	Ambiguous
Leuzea cynaroides	EOL	TPL	Synonym	Ambiguous
Phegopteris decursive-pinnata	EOL	TPL	Ambiguous	Accepted
Aloe striatula	COL	EOL	Accepted	Ambiguous
Aloe striatula	EOL	TPL	Ambiguous	Accepted
Mammillaria gracilis	COL	TPL	Synonym	Accepted
Mammillaria gracilis	EOL	TPL	Synonym	Accepted
Primula japonica	COL	TPL	Accepted	Unresolved
Primula japonica	EOL	TPL	Accepted	Unresolved
Citrus hassaku	EOL	TPL	Accepted	Synonym
Hydrangea arborescens subsp. discolor	COL	TPL	Synonym	Accepted
Hydrangea arborescens subsp. discolor	EOL	TPL	Synonym	Accepted
Carex alba	COL	TPL	Accepted	Ambiguous
Carex alba	EOL	TPL	Accepted	Ambiguous
Potentilla longifolia	COL	TPL	Accepted	Ambiguous
Potentilla longifolia	EOL	TPL	Accepted	Ambiguous
Berberis x ottawensis	EOL	TPL	Synonym	Unresolved
Scorzonera cana	COL	TPL	Synonym	Ambiguous
Scorzonera cana	EOL	TPL	Synonym	Ambiguous
Scaphium macropodum	COL	EOL	Accepted	Synonym
Scaphium macropodum	EOL	TPL	Synonym	Accepted
Ligusticum ferulaceum	COL	EOL	Ambiguous	Accepted
Ligusticum ferulaceum	EOL	TPL	Accepted	Ambiguous
Erythrophleum suaveolens	COL	TPL	Accepted	Ambiguous
Erythrophleum suaveolens	EOL	TPL	Accepted	Ambiguous
Sorbus scopulina	COL	TPL	Accepted	Ambiguous
Sorbus scopulina	EOL	TPL	Accepted	Ambiguous
Rosa arkansana	COL	EOL	Accepted	Ambiguous
Rosa arkansana	COL	TPL	Accepted	Ambiguous
Aloe lateritia var. lateritia	COL	EOL	Accepted	Ambiguous
Aloe lateritia var. lateritia	COL	TPL	Accepted	Synonym
Aloe lateritia var. lateritia	EOL	TPL	Ambiguous	Synonym
Paederota bonarota	COL	TPL	Accepted	Synonym
Paederota bonarota	EOL	TPL	Accepted	Synonym
Lonicera orientalis	COL	EOL	Ambiguous	Accepted
Lonicera orientalis	EOL	TPL	Accepted	Ambiguous
Hieracium laevigatum	COL	EOL	Ambiguous	Accepted
Hieracium laevigatum	EOL	TPL	Accepted	Ambiguous
Sorbus aucuparia	COL	TPL	Accepted	Ambiguous
Sorbus aucuparia	EOL	TPL	Accepted	Ambiguous
Pentaglottis sempervirens	COL	TPL	Accepted	Ambiguous
Pentaglottis sempervirens	EOL	TPL	Accepted	Ambiguous
Anemone obtusiloba	COL	TPL	Accepted	Ambiguous
Anemone obtusiloba	EOL	TPL	Accepted	Ambiguous
Cotoneaster nebrodensis	COL	EOL	Accepted	Ambiguous
Cotoneaster nebrodensis	COL	TPL	Accepted	Ambiguous
Verbesina alternifolia	COL	TPL	Accepted	Ambiguous
Verbesina alternifolia	EOL	TPL	Accepted	Ambiguous
Asclepias curassavica	COL	TPL	Accepted	Ambiguous
Asclepias curassavica	EOL	TPL	Accepted	Ambiguous
Anchusa azurea	COL	EOL	Ambiguous	Accepted
Anchusa azurea	EOL	TPL	Accepted	Ambiguous
Sorbus latifolia	COL	TPL	Accepted	Ambiguous
Sorbus latifolia	EOL	TPL	Accepted	Ambiguous
Pandanus veitchii	COL	EOL	Synonym	Ambiguous
Pandanus veitchii	EOL	TPL	Ambiguous	Synonym
Gentiana nivalis	COL	TPL	Accepted	Ambiguous
Gentiana nivalis	EOL	TPL	Accepted	Ambiguous
Rosularia pallida	COL	EOL	Synonym	Accepted
Rosularia pallida	COL	TPL	Synonym	Accepted
Trichosanthes anguina	COL	EOL	Synonym	Accepted
Trichosanthes anguina	EOL	TPL	Accepted	Synonym
Scabiosa cinerea subsp. hladnikiana	COL	TPL	Synonym	Accepted
Potentilla pensylvanica	COL	EOL	Accepted	Ambiguous
Potentilla pensylvanica	COL	TPL	Accepted	Ambiguous
Marcetella moquiniana	COL	TPL	Accepted	Unresolved
Marcetella moquiniana	EOL	TPL	Accepted	Unresolved
Abrus precatorius	COL	TPL	Accepted	Ambiguous
Abrus precatorius	EOL	TPL	Accepted	Ambiguous
Solanum ovigerum	COL	EOL	Synonym	Accepted
Solanum ovigerum	COL	TPL	Synonym	Unresolved
Solanum ovigerum	EOL	TPL	Accepted	Unresolved
Carduus hamulosus	COL	TPL	Accepted	Ambiguous
Carduus hamulosus	EOL	TPL	Accepted	Ambiguous
Dryopteris borreri	COL	TPL	Accepted	Synonym
Dryopteris borreri	EOL	TPL	Accepted	Synonym
Campanula rhomboidalis	COL	TPL	Accepted	Ambiguous
Campanula rhomboidalis	EOL	TPL	Accepted	Ambiguous
Euphorbia baetica	COL	EOL	Accepted	Ambiguous
Euphorbia baetica	EOL	TPL	Ambiguous	Accepted
Cotoneaster latifolius	COL	TPL	Accepted	Unresolved
Cotoneaster latifolius	EOL	TPL	Accepted	Unresolved
Staphylea emodi	COL	TPL	Accepted	Unresolved
Staphylea emodi	EOL	TPL	Accepted	Unresolved
Rosa wichuraiana	COL	EOL	Synonym	Ambiguous
Rosa wichuraiana	COL	TPL	Synonym	Ambiguous
Anemonidium dichotomum	COL	TPL	Synonym	Ambiguous
Anemonidium dichotomum	EOL	TPL	Synonym	Ambiguous
Primula praenitens	COL	TPL	Synonym	Accepted
Primula praenitens	EOL	TPL	Synonym	Accepted
Pseudocydonia sinensis	COL	EOL	Accepted	Synonym
Pseudocydonia sinensis	COL	TPL	Accepted	Synonym
Modiolastrum lateritium	COL	EOL	Accepted	Synonym
Grindelia camporum	COL	EOL	Synonym	Accepted
Grindelia camporum	EOL	TPL	Accepted	Synonym
Emilia coccinea	COL	TPL	Accepted	Ambiguous
Emilia coccinea	EOL	TPL	Accepted	Ambiguous
Elymus dahuricus	COL	EOL	Accepted	Ambiguous
Elymus dahuricus	EOL	TPL	Ambiguous	Accepted
Gonostemon gariepensis	COL	TPL	Synonym	Unresolved
Altamiranoa batesii	COL	TPL	Synonym	Unresolved
Altamiranoa batesii	EOL	TPL	Synonym	Unresolved
Cotoneaster laetevirens	COL	EOL	Synonym	Accepted
Cotoneaster laetevirens	COL	TPL	Synonym	Accepted
Cotoneaster humilis	COL	TPL	Accepted	Unresolved
Cotoneaster humilis	EOL	TPL	Accepted	Unresolved
Triticum polonicum	COL	EOL	Synonym	Accepted
Triticum polonicum	COL	TPL	Synonym	Accepted
Potentilla intermedia	COL	TPL	Accepted	Ambiguous
Potentilla intermedia	EOL	TPL	Accepted	Ambiguous
Carex divisa	COL	TPL	Accepted	Ambiguous
Carex divisa	EOL	TPL	Accepted	Ambiguous
Salvia amplexicaulis	COL	TPL	Accepted	Ambiguous
Salvia amplexicaulis	EOL	TPL	Accepted	Ambiguous
Cinnamomum sieboldii	COL	EOL	Synonym	Accepted
Cinnamomum sieboldii	COL	TPL	Synonym	Ambiguous
Cinnamomum sieboldii	EOL	TPL	Accepted	Ambiguous
Silene dichotoma	COL	TPL	Accepted	Ambiguous
Silene dichotoma	EOL	TPL	Accepted	Ambiguous
Malva pusilla	COL	EOL	Accepted	Ambiguous
Malva pusilla	EOL	TPL	Ambiguous	Accepted
Cotoneaster nitidus	COL	TPL	Accepted	Ambiguous
Cotoneaster nitidus	EOL	TPL	Accepted	Ambiguous
Eriophyllum lanatum var. leucophyllum	COL	EOL	Ambiguous	Accepted
Eriophyllum lanatum var. leucophyllum	EOL	TPL	Accepted	Ambiguous
Gnaphalium undulatum	COL	EOL	Ambiguous	Accepted
Gnaphalium undulatum	EOL	TPL	Accepted	Ambiguous
Calamovilfa longifolia	COL	EOL	Accepted	Ambiguous
Calamovilfa longifolia	EOL	TPL	Ambiguous	Accepted
Dendroglossa zeylanica	COL	TPL	Synonym	Accepted
Scabiosa colchica	COL	TPL	Accepted	Unresolved
Agave vivipara	COL	TPL	Accepted	Ambiguous
Agave vivipara	EOL	TPL	Accepted	Ambiguous
Aptenia lancifolia	COL	EOL	Synonym	Accepted
Aptenia lancifolia	EOL	TPL	Accepted	Synonym
Ulmus japonica	COL	EOL	Ambiguous	Synonym
Ulmus japonica	COL	TPL	Ambiguous	Synonym
Myoporum acuminatum	COL	EOL	Synonym	Accepted
Myoporum acuminatum	EOL	TPL	Accepted	Synonym
Solanum nigrum	COL	TPL	Accepted	Synonym
Solanum nigrum	EOL	TPL	Accepted	Synonym
Limonium gymnesicum	COL	TPL	Accepted	Unresolved
Limonium gymnesicum	EOL	TPL	Accepted	Unresolved
Epilobium parviflorum	COL	TPL	Accepted	Ambiguous
Epilobium parviflorum	EOL	TPL	Accepted	Ambiguous
Cotoneaster cooperi	COL	EOL	Synonym	Accepted
Cotoneaster cooperi	COL	TPL	Synonym	Ambiguous
Cotoneaster cooperi	EOL	TPL	Accepted	Ambiguous
Albuca shawii	COL	TPL	Accepted	Synonym
Albuca shawii	EOL	TPL	Accepted	Synonym
Senecio nemorensis subsp. fuchsii	COL	EOL	Synonym	Accepted
Senecio nemorensis subsp. fuchsii	EOL	TPL	Accepted	Synonym
Submatucana paucicostata	COL	TPL	Synonym	Unresolved
Submatucana paucicostata	EOL	TPL	Synonym	Unresolved
Saxifraga geranioides	COL	TPL	Accepted	Ambiguous
Saxifraga geranioides	EOL	TPL	Accepted	Ambiguous
Pedicularis rostratospicata subsp. helvetica	COL	EOL	Accepted	Synonym
Pedicularis rostratospicata subsp. helvetica	EOL	TPL	Synonym	Accepted
Linum album	COL	TPL	Accepted	Unresolved
Linum album	EOL	TPL	Accepted	Unresolved
Arthrocnemum macrostachyum	COL	TPL	Accepted	Ambiguous
Arthrocnemum macrostachyum	EOL	TPL	Accepted	Ambiguous
Androsace mucronifolia	COL	EOL	Accepted	Synonym
Androsace mucronifolia	EOL	TPL	Synonym	Accepted
Leutea elbursensis	EOL	TPL	Accepted	Synonym
Vincetoxicum roseum	COL	TPL	Synonym	Unresolved
Medinilla succulenta	COL	TPL	Accepted	Unresolved
Medinilla succulenta	EOL	TPL	Accepted	Unresolved
Amaranthus cruentus	COL	EOL	Synonym	Accepted
Amaranthus cruentus	COL	TPL	Synonym	Accepted
Gloxinia perennis	COL	TPL	Accepted	Ambiguous
Gloxinia perennis	EOL	TPL	Accepted	Ambiguous
Ampelopsis aconitifolia var. glabra	COL	EOL	Synonym	Accepted
Ampelopsis aconitifolia var. glabra	EOL	TPL	Accepted	Synonym
Potentilla dickinsii	COL	EOL	Accepted	Synonym
Potentilla dickinsii	COL	TPL	Accepted	Synonym
Viburnum x rhytidophylloides	EOL	TPL	Synonym	Unresolved
Sanguisorba diandra	COL	TPL	Accepted	Ambiguous
Sanguisorba diandra	EOL	TPL	Accepted	Ambiguous
Juniperus x media	COL	TPL	Synonym	Ambiguous
Weigela floribunda	COL	TPL	Accepted	Unresolved
Weigela floribunda	EOL	TPL	Accepted	Unresolved
Trachymene pilosa	COL	TPL	Accepted	Unresolved
Trachymene pilosa	EOL	TPL	Accepted	Unresolved
Cotoneaster racemiflorus var. royleanus	EOL	TPL	Accepted	Unresolved
Rosa acicularis	COL	TPL	Accepted	Ambiguous
Rosa acicularis	EOL	TPL	Accepted	Ambiguous
Cotoneaster atropurpureus	COL	EOL	Synonym	Accepted
Cotoneaster atropurpureus	COL	TPL	Synonym	Accepted
Potentilla tanacetifolia	COL	TPL	Accepted	Ambiguous
Potentilla tanacetifolia	EOL	TPL	Accepted	Ambiguous
Crataegus arnoldiana	COL	EOL	Synonym	Accepted
Crataegus arnoldiana	COL	TPL	Synonym	Accepted
Scorzonera villosa	COL	TPL	Accepted	Ambiguous
Scorzonera villosa	EOL	TPL	Accepted	Ambiguous
Nephelium hypoleucum	COL	TPL	Accepted	Unresolved
Nephelium hypoleucum	EOL	TPL	Accepted	Unresolved
Genista sylvestris subsp. sylvestris	COL	TPL	Accepted	Synonym
Genista sylvestris subsp. sylvestris	EOL	TPL	Accepted	Synonym
Cotoneaster perpusillus	COL	EOL	Synonym	Accepted
Cotoneaster perpusillus	COL	TPL	Synonym	Ambiguous
Cotoneaster perpusillus	EOL	TPL	Accepted	Ambiguous
Berberis consimilis	COL	EOL	Synonym	Accepted
Berberis consimilis	COL	TPL	Synonym	Accepted
Bauhinia corymbosa	COL	TPL	Accepted	Ambiguous
Bauhinia corymbosa	EOL	TPL	Accepted	Ambiguous
Erigeron nanus	COL	EOL	Ambiguous	Accepted
Erigeron nanus	EOL	TPL	Accepted	Ambiguous
Oenothera missouriensis	COL	TPL	Synonym	Accepted
Oenothera missouriensis	EOL	TPL	Synonym	Accepted
Dorotheanthus apetalus	COL	EOL	Synonym	Accepted
Dorotheanthus apetalus	COL	TPL	Synonym	Accepted
Paeonia suffruticosa	COL	TPL	Accepted	Unresolved
Paeonia suffruticosa	EOL	TPL	Accepted	Unresolved
Astrantia carniolica	COL	TPL	Accepted	Ambiguous
Astrantia carniolica	EOL	TPL	Accepted	Ambiguous
Liatris ligulistylis	COL	TPL	Accepted	Ambiguous
Liatris ligulistylis	EOL	TPL	Accepted	Ambiguous
Melampyrum sylvaticum	COL	TPL	Accepted	Ambiguous
Melampyrum sylvaticum	EOL	TPL	Accepted	Ambiguous
Ampelopsis glandulosa var. brevipedunculata	COL	EOL	Synonym	Accepted
Ampelopsis glandulosa var. brevipedunculata	COL	TPL	Synonym	Accepted
Calendula stellata	COL	TPL	Accepted	Ambiguous
Calendula stellata	EOL	TPL	Accepted	Ambiguous
Metroxylon sagu	COL	EOL	Accepted	Ambiguous
Metroxylon sagu	EOL	TPL	Ambiguous	Accepted
Lavandula minutolii var. minutolii	COL	EOL	Accepted	Ambiguous
Lavandula minutolii var. minutolii	COL	TPL	Accepted	Synonym
Lavandula minutolii var. minutolii	EOL	TPL	Ambiguous	Synonym
Tillandsia polystachia	COL	TPL	Accepted	Ambiguous
Tillandsia polystachia	EOL	TPL	Accepted	Ambiguous
Symphytum x uplandicum	EOL	TPL	Synonym	Accepted
Galtonia viridiflora	COL	TPL	Synonym	Ambiguous
Galtonia viridiflora	EOL	TPL	Synonym	Ambiguous
Anchusa ochroleuca	COL	TPL	Accepted	Ambiguous
Anchusa ochroleuca	EOL	TPL	Accepted	Ambiguous
Rodgersia pinnata	COL	TPL	Accepted	Unresolved
Rodgersia pinnata	EOL	TPL	Accepted	Unresolved
Chenopodium ficifolium	COL	EOL	Accepted	Synonym
Chenopodium ficifolium	EOL	TPL	Synonym	Accepted
Haplopappus glutinosus	COL	TPL	Accepted	Ambiguous
Haplopappus glutinosus	EOL	TPL	Accepted	Ambiguous
Narcissus nevadensis	COL	EOL	Synonym	Accepted
Narcissus nevadensis	COL	TPL	Synonym	Accepted
Lysimachia acroadenia	COL	TPL	Accepted	Unresolved
Xeranthemum cylindraceum	COL	TPL	Accepted	Ambiguous
Xeranthemum cylindraceum	EOL	TPL	Accepted	Ambiguous
Rhododendron camtschaticum	COL	EOL	Accepted	Synonym
Rhododendron camtschaticum	EOL	TPL	Synonym	Accepted
Rhododendron yedoense	COL	TPL	Accepted	Unresolved
Rhododendron yedoense	EOL	TPL	Accepted	Unresolved
Hypoestes polythyrsa	COL	TPL	Accepted	Unresolved
Hypoestes polythyrsa	EOL	TPL	Accepted	Unresolved
Crataegus phaenopyrum	COL	TPL	Accepted	Ambiguous
Crataegus phaenopyrum	EOL	TPL	Accepted	Ambiguous
Photinia nussia	COL	EOL	Synonym	Ambiguous
Photinia nussia	COL	TPL	Synonym	Unresolved
Photinia nussia	EOL	TPL	Ambiguous	Unresolved
Euphorbia lactea	COL	TPL	Accepted	Ambiguous
Euphorbia lactea	EOL	TPL	Accepted	Ambiguous
Notocactus sellowii	COL	TPL	Synonym	Unresolved
Notocactus sellowii	EOL	TPL	Synonym	Unresolved
Lotus angustissimus	COL	TPL	Accepted	Ambiguous
Lotus angustissimus	EOL	TPL	Accepted	Ambiguous
Shorea smithiana	COL	TPL	Accepted	Unresolved
Shorea smithiana	EOL	TPL	Accepted	Unresolved
Hippophae rhamnoides	COL	TPL	Accepted	Synonym
Hippophae rhamnoides	EOL	TPL	Accepted	Synonym
Hypericum quadrangulum	COL	TPL	Accepted	Ambiguous
Hypericum quadrangulum	EOL	TPL	Accepted	Ambiguous
Artemisia mongolica	COL	TPL	Accepted	Ambiguous
Artemisia mongolica	EOL	TPL	Accepted	Ambiguous
Euphorbia heterophylla	COL	TPL	Accepted	Ambiguous
Euphorbia heterophylla	EOL	TPL	Accepted	Ambiguous
Crateva magna	COL	TPL	Accepted	Synonym
Crateva magna	EOL	TPL	Accepted	Synonym
Davallia bullata	COL	EOL	Synonym	Ambiguous
Davallia bullata	COL	TPL	Synonym	Unresolved
Davallia bullata	EOL	TPL	Ambiguous	Unresolved
Cotoneaster hodjingensis	COL	EOL	Synonym	Accepted
Cotoneaster hodjingensis	COL	TPL	Synonym	Accepted
Plantago raoulii	COL	TPL	Accepted	Unresolved
Plantago raoulii	EOL	TPL	Accepted	Unresolved
Ceanothus cuneatus	COL	TPL	Accepted	Ambiguous
Ceanothus cuneatus	EOL	TPL	Accepted	Ambiguous
Goniophlebium subauriculatum	COL	TPL	Accepted	Synonym
Goniophlebium subauriculatum	EOL	TPL	Accepted	Synonym
Herniaria hirsuta subsp. cinerea	COL	TPL	Synonym	Ambiguous
Herniaria hirsuta subsp. cinerea	EOL	TPL	Synonym	Ambiguous
Mammillaria bucareliensis	COL	TPL	Synonym	Unresolved
Mammillaria bucareliensis	EOL	TPL	Synonym	Unresolved
Aubrieta canescens subsp. cilicica	COL	EOL	Synonym	Accepted
Aubrieta canescens subsp. cilicica	COL	TPL	Synonym	Accepted
Helictochloa pratensis	COL	TPL	Synonym	Unresolved
Helictochloa pratensis	EOL	TPL	Synonym	Unresolved
Plantago urvillei	COL	EOL	Synonym	Accepted
Plantago urvillei	COL	TPL	Synonym	Accepted
Triticum durum	COL	EOL	Synonym	Accepted
Triticum durum	COL	TPL	Synonym	Accepted
Aronia mitschurinii	EOL	TPL	Accepted	Unresolved
Indigofera spicata	COL	TPL	Accepted	Ambiguous
Indigofera spicata	EOL	TPL	Accepted	Ambiguous
Capsicum baccatum	COL	TPL	Accepted	Ambiguous
Capsicum baccatum	EOL	TPL	Accepted	Ambiguous
Pyrus salicifolia	COL	TPL	Accepted	Ambiguous
Pyrus salicifolia	EOL	TPL	Accepted	Ambiguous
Mutellina purpurea	EOL	TPL	Accepted	Unresolved
Primula clusiana	COL	EOL	Accepted	Ambiguous
Primula clusiana	EOL	TPL	Ambiguous	Accepted
Tanacetum microphyllum	EOL	TPL	Accepted	Unresolved
Douglasia montana	COL	EOL	Accepted	Synonym
Douglasia montana	COL	TPL	Accepted	Synonym
Phyteuma michelii	COL	TPL	Accepted	Ambiguous
Phyteuma michelii	EOL	TPL	Accepted	Ambiguous
Echinopsis subdenudata	COL	EOL	Synonym	Accepted
Echinopsis subdenudata	COL	TPL	Synonym	Accepted
Bauhinia malabarica	COL	EOL	Accepted	Ambiguous
Bauhinia malabarica	EOL	TPL	Ambiguous	Accepted
Bidens frondosa	COL	TPL	Accepted	Ambiguous
Bidens frondosa	EOL	TPL	Accepted	Ambiguous
Elymus glaucus	COL	TPL	Accepted	Ambiguous
Elymus glaucus	EOL	TPL	Accepted	Ambiguous
Minuartia laricifolia	COL	EOL	Synonym	Accepted
Minuartia laricifolia	COL	TPL	Synonym	Accepted
Xeranthemum annuum	COL	TPL	Accepted	Ambiguous
Xeranthemum annuum	EOL	TPL	Accepted	Ambiguous
Woodsia subintermedia	COL	EOL	Accepted	Synonym
Woodsia subintermedia	COL	TPL	Accepted	Unresolved
Woodsia subintermedia	EOL	TPL	Synonym	Unresolved
Paeonia officinalis	COL	TPL	Accepted	Ambiguous
Paeonia officinalis	EOL	TPL	Accepted	Ambiguous
Festuca airoides	COL	TPL	Accepted	Ambiguous
Festuca airoides	EOL	TPL	Accepted	Ambiguous
Stewartia serrata	COL	TPL	Accepted	Unresolved
Stewartia serrata	EOL	TPL	Accepted	Unresolved
Rubus parviflorus	COL	TPL	Accepted	Ambiguous
Rubus parviflorus	EOL	TPL	Accepted	Ambiguous
Muehlenbeckia axillaris	COL	TPL	Accepted	Unresolved
Muehlenbeckia axillaris	EOL	TPL	Accepted	Unresolved
Rubus idaeus	COL	EOL	Accepted	Ambiguous
Rubus idaeus	COL	TPL	Accepted	Ambiguous
Quercus castaneifolia	COL	TPL	Accepted	Ambiguous
Quercus castaneifolia	EOL	TPL	Accepted	Ambiguous
Quercifilix zeylanica	EOL	TPL	Accepted	Synonym
Pedicularis adscendens	COL	TPL	Synonym	Unresolved
Rosa vosagiaca	COL	EOL	Synonym	Ambiguous
Rosa vosagiaca	EOL	TPL	Ambiguous	Synonym
Berberis integerrima	COL	EOL	Accepted	Synonym
Berberis integerrima	COL	TPL	Accepted	Ambiguous
Berberis integerrima	EOL	TPL	Synonym	Ambiguous
Silene sicula	COL	TPL	Ambiguous	Synonym
Rhinanthus angustifolius	COL	TPL	Accepted	Synonym
Rhinanthus angustifolius	EOL	TPL	Accepted	Synonym
Silene alpina	COL	EOL	Ambiguous	Accepted
Silene alpina	COL	TPL	Ambiguous	Unresolved
Silene alpina	EOL	TPL	Accepted	Unresolved
Atriplex rosea	COL	TPL	Accepted	Ambiguous
Atriplex rosea	EOL	TPL	Accepted	Ambiguous
Cerastium austroalpinum	COL	EOL	Synonym	Accepted
Cerastium austroalpinum	EOL	TPL	Accepted	Synonym
Pachyphragma macrophyllum	COL	TPL	Accepted	Synonym
Pachyphragma macrophyllum	EOL	TPL	Accepted	Synonym
Veronica austriaca subsp. jacquinii	COL	EOL	Accepted	Synonym
Veronica austriaca subsp. jacquinii	COL	TPL	Accepted	Synonym
Silene damascena	COL	TPL	Accepted	Unresolved
Silene damascena	EOL	TPL	Accepted	Unresolved
Coccocypselum herbaceum	COL	TPL	Accepted	Ambiguous
Coccocypselum herbaceum	EOL	TPL	Accepted	Ambiguous
Crassula perforata	COL	TPL	Accepted	Ambiguous
Crassula perforata	EOL	TPL	Accepted	Ambiguous
Nephelium cuspidatum	COL	TPL	Accepted	Unresolved
Nephelium cuspidatum	EOL	TPL	Accepted	Unresolved
Ageratum conyzoides	COL	TPL	Accepted	Ambiguous
Ageratum conyzoides	EOL	TPL	Accepted	Ambiguous
Centaurea ambigua	COL	TPL	Accepted	Ambiguous
Centaurea ambigua	EOL	TPL	Accepted	Ambiguous
Gentiana caucasica	COL	EOL	Ambiguous	Accepted
Gentiana caucasica	EOL	TPL	Accepted	Ambiguous
Euphorbia paniculata	COL	TPL	Accepted	Ambiguous
Euphorbia paniculata	EOL	TPL	Accepted	Ambiguous
Echium gentianoides	COL	TPL	Accepted	Synonym
Echium gentianoides	EOL	TPL	Accepted	Synonym
Cotoneaster conspicuus	COL	TPL	Accepted	Ambiguous
Cotoneaster conspicuus	EOL	TPL	Accepted	Ambiguous
Cotoneaster rannensis	COL	EOL	Synonym	Accepted
Cotoneaster rannensis	COL	TPL	Synonym	Unresolved
Cotoneaster rannensis	EOL	TPL	Accepted	Unresolved
Artemisia annua	COL	TPL	Accepted	Ambiguous
Artemisia annua	EOL	TPL	Accepted	Ambiguous
Stipa viridula	COL	EOL	Synonym	Accepted
Stipa viridula	EOL	TPL	Accepted	Synonym
Potentilla supina	COL	TPL	Accepted	Ambiguous
Potentilla supina	EOL	TPL	Accepted	Ambiguous
Madia gracilis	COL	TPL	Accepted	Ambiguous
Madia gracilis	EOL	TPL	Accepted	Ambiguous
Pilularia globulifera	COL	TPL	Accepted	Synonym
Pilularia globulifera	EOL	TPL	Accepted	Synonym
Lobelia excelsa	COL	TPL	Accepted	Ambiguous
Lobelia excelsa	EOL	TPL	Accepted	Ambiguous
Deutzia sieboldiana	COL	TPL	Synonym	Unresolved
Deutzia sieboldiana	EOL	TPL	Synonym	Unresolved
Ternstroemia gymnanthera	COL	TPL	Accepted	Ambiguous
Ternstroemia gymnanthera	EOL	TPL	Accepted	Ambiguous
Vitaliana primuliflora	COL	EOL	Synonym	Ambiguous
Vitaliana primuliflora	COL	TPL	Synonym	Accepted
Vitaliana primuliflora	EOL	TPL	Ambiguous	Accepted
Potentilla speciosa	COL	TPL	Accepted	Ambiguous
Potentilla speciosa	EOL	TPL	Accepted	Ambiguous
Doodia media	COL	EOL	Synonym	Ambiguous
Doodia media	EOL	TPL	Ambiguous	Synonym
Anchusa officinalis	COL	TPL	Accepted	Ambiguous
Anchusa officinalis	EOL	TPL	Accepted	Ambiguous
Ardisia humilis	COL	TPL	Accepted	Ambiguous
Ardisia humilis	EOL	TPL	Accepted	Ambiguous
Hypericum maculatum	COL	TPL	Accepted	Ambiguous
Hypericum maculatum	EOL	TPL	Accepted	Ambiguous
Anemone reflexa	COL	TPL	Accepted	Ambiguous
Anemone reflexa	EOL	TPL	Accepted	Ambiguous
Thermopsis montana	COL	TPL	Accepted	Ambiguous
Thermopsis montana	EOL	TPL	Accepted	Ambiguous
Spiraea alpina	COL	EOL	Accepted	Synonym
Spiraea alpina	COL	TPL	Accepted	Ambiguous
Spiraea alpina	EOL	TPL	Synonym	Ambiguous
Sedum sieboldii	COL	TPL	Synonym	Ambiguous
Sedum sieboldii	EOL	TPL	Synonym	Ambiguous
Paeonia morisii	COL	EOL	Synonym	Accepted
Paeonia morisii	EOL	TPL	Accepted	Synonym
Cajanus cajan	COL	TPL	Accepted	Ambiguous
Cajanus cajan	EOL	TPL	Accepted	Ambiguous
Cotoneaster stracheyi	COL	TPL	Accepted	Unresolved
Cotoneaster stracheyi	EOL	TPL	Accepted	Unresolved
Plantago aschersonii	COL	TPL	Synonym	Unresolved
Artemisia argentea	EOL	TPL	Accepted	Ambiguous
Rhamnus dolichophylla	COL	TPL	Accepted	Unresolved
Rhamnus dolichophylla	EOL	TPL	Accepted	Unresolved
Bromelia plumieri	COL	EOL	Synonym	Ambiguous
Bromelia plumieri	EOL	TPL	Ambiguous	Synonym
Boehmeria platanifolia	COL	EOL	Synonym	Accepted
Boehmeria platanifolia	COL	TPL	Synonym	Ambiguous
Boehmeria platanifolia	EOL	TPL	Accepted	Ambiguous
Heracleum pubescens	COL	EOL	Accepted	Ambiguous
Heracleum pubescens	EOL	TPL	Ambiguous	Accepted
Bryophyllum pinnatum	COL	EOL	Synonym	Ambiguous
Bryophyllum pinnatum	COL	TPL	Synonym	Accepted
Bryophyllum pinnatum	EOL	TPL	Ambiguous	Accepted
Paeonia tomentosa	COL	EOL	Synonym	Accepted
Paeonia tomentosa	EOL	TPL	Accepted	Synonym
Iris xiphium	COL	TPL	Accepted	Ambiguous
Iris xiphium	EOL	TPL	Accepted	Ambiguous
Cotoneaster zabelii	COL	TPL	Accepted	Ambiguous
Cotoneaster zabelii	EOL	TPL	Accepted	Ambiguous
Geum pyrenaicum	COL	TPL	Accepted	Ambiguous
Geum pyrenaicum	EOL	TPL	Accepted	Ambiguous
Pteris quadriaurita	COL	EOL	Accepted	Synonym
Pteris quadriaurita	EOL	TPL	Synonym	Accepted
Helleborus x hybridus	EOL	TPL	Accepted	Unresolved
Centaurea rubriflora	COL	TPL	Synonym	Unresolved
Centaurea rubriflora	EOL	TPL	Synonym	Unresolved
Euphrasia rostkoviana	COL	EOL	Ambiguous	Accepted
Euphrasia rostkoviana	COL	TPL	Ambiguous	Unresolved
Euphrasia rostkoviana	EOL	TPL	Accepted	Unresolved
Cystopteris tasmanica	COL	TPL	Accepted	Unresolved
Cystopteris tasmanica	EOL	TPL	Accepted	Unresolved
Tillandsia recurvata	COL	TPL	Accepted	Ambiguous
Tillandsia recurvata	EOL	TPL	Accepted	Ambiguous
Lonicera prolifera	COL	TPL	Synonym	Accepted
Lonicera prolifera	EOL	TPL	Synonym	Accepted
Hordeum distichon	COL	EOL	Accepted	Ambiguous
Hordeum distichon	EOL	TPL	Ambiguous	Accepted
Saxifraga x geum	EOL	TPL	Synonym	Accepted
Gunnera manicata	COL	TPL	Accepted	Ambiguous
Gunnera manicata	EOL	TPL	Accepted	Ambiguous
Athyrium accedens	COL	TPL	Synonym	Accepted
Athyrium accedens	EOL	TPL	Synonym	Accepted
Grahamia coahuilensis	COL	EOL	Accepted	Ambiguous
Grahamia coahuilensis	COL	TPL	Accepted	Synonym
Grahamia coahuilensis	EOL	TPL	Ambiguous	Synonym
Othonna crassifolia	COL	EOL	Synonym	Accepted
Othonna crassifolia	COL	TPL	Synonym	Ambiguous
Othonna crassifolia	EOL	TPL	Accepted	Ambiguous
Notocactus graessneri	COL	TPL	Synonym	Unresolved
Notocactus graessneri	EOL	TPL	Synonym	Unresolved
Abutilon mollissimum	COL	EOL	Accepted	Synonym
Abutilon mollissimum	EOL	TPL	Synonym	Accepted
Crassula tillaea	COL	TPL	Accepted	Ambiguous
Crassula tillaea	EOL	TPL	Accepted	Ambiguous
Huernia hystrix	COL	TPL	Accepted	Unresolved
Huernia hystrix	EOL	TPL	Accepted	Unresolved
Doodia heterophylla	COL	EOL	Synonym	Accepted
Doodia heterophylla	COL	TPL	Synonym	Unresolved
Doodia heterophylla	EOL	TPL	Accepted	Unresolved
Cochlearia officinalis	COL	TPL	Accepted	Ambiguous
Cochlearia officinalis	EOL	TPL	Accepted	Ambiguous
Viola elatior	COL	EOL	Accepted	Ambiguous
Viola elatior	EOL	TPL	Ambiguous	Accepted
Silene macrorhiza	COL	TPL	Ambiguous	Synonym
Aloe variegata	COL	EOL	Accepted	Ambiguous
Aloe variegata	COL	TPL	Accepted	Ambiguous
Veronica anagallis-aquatica subsp. anagallis-aquatica	COL	EOL	Accepted	Synonym
Alysicarpus vaginalis	COL	TPL	Accepted	Ambiguous
Alysicarpus vaginalis	EOL	TPL	Accepted	Ambiguous
Saxifraga cuneifolia	COL	TPL	Accepted	Ambiguous
Saxifraga cuneifolia	EOL	TPL	Accepted	Ambiguous
Mairetis microsperma	COL	TPL	Accepted	Unresolved
Mairetis microsperma	EOL	TPL	Accepted	Unresolved
Cerastium decalvans	COL	TPL	Accepted	Ambiguous
Cerastium decalvans	EOL	TPL	Accepted	Ambiguous
Aquilegia canadensis	COL	TPL	Accepted	Ambiguous
Aquilegia canadensis	EOL	TPL	Accepted	Ambiguous
Hieracium tomentosum	COL	TPL	Accepted	Ambiguous
Hieracium tomentosum	EOL	TPL	Accepted	Ambiguous
Teline nervosa	EOL	TPL	Accepted	Unresolved
Sorbus buschiana	COL	EOL	Synonym	Accepted
Sorbus buschiana	COL	TPL	Synonym	Accepted
Sorbus mergenthaleriana	COL	TPL	Accepted	Unresolved
Sorbus mergenthaleriana	EOL	TPL	Accepted	Unresolved
Rumex maximus	COL	EOL	Ambiguous	Accepted
Rumex maximus	EOL	TPL	Accepted	Ambiguous
Crataegus laciniata	COL	EOL	Accepted	Ambiguous
Crataegus laciniata	COL	TPL	Accepted	Ambiguous
Potamogeton berchtoldii	COL	EOL	Accepted	Synonym
Potamogeton berchtoldii	EOL	TPL	Synonym	Accepted
Hepatica nobilis	COL	TPL	Accepted	Ambiguous
Hepatica nobilis	EOL	TPL	Accepted	Ambiguous
Juncus atratus	COL	TPL	Accepted	Ambiguous
Juncus atratus	EOL	TPL	Accepted	Ambiguous
Crataegus macracantha	COL	EOL	Ambiguous	Accepted
Crataegus macracantha	EOL	TPL	Accepted	Ambiguous
Crataegus aronia	COL	EOL	Ambiguous	Synonym
Crataegus aronia	COL	TPL	Ambiguous	Synonym
Papaver tenuifolium	COL	TPL	Accepted	Unresolved
Papaver tenuifolium	EOL	TPL	Accepted	Unresolved
Armeria pseudarmeria	COL	TPL	Accepted	Unresolved
Armeria pseudarmeria	EOL	TPL	Accepted	Unresolved
Triomma malaccensis	COL	TPL	Accepted	Unresolved
Triomma malaccensis	EOL	TPL	Accepted	Unresolved
Viola palmata	COL	EOL	Accepted	Synonym
Viola palmata	EOL	TPL	Synonym	Accepted
Teucrium oxylepis	COL	EOL	Accepted	Ambiguous
Teucrium oxylepis	EOL	TPL	Ambiguous	Accepted
Phlomis macrophylla	COL	EOL	Synonym	Accepted
Phlomis macrophylla	EOL	TPL	Accepted	Synonym
Perilla frutescens var. acuta	COL	EOL	Synonym	Accepted
Perilla frutescens var. acuta	EOL	TPL	Accepted	Synonym
Crataegus turkestanica	COL	EOL	Synonym	Accepted
Crataegus turkestanica	EOL	TPL	Accepted	Synonym
Acinos alpinus	COL	TPL	Synonym	Ambiguous
Acinos alpinus	EOL	TPL	Synonym	Ambiguous
Allium rubellum	COL	TPL	Accepted	Ambiguous
Allium rubellum	EOL	TPL	Accepted	Ambiguous
Armeria caespitosa	COL	EOL	Ambiguous	Accepted
Armeria caespitosa	COL	TPL	Ambiguous	Accepted
Pulsatilla alpina subsp. millefoliata	COL	EOL	Accepted	Synonym
Leontodon tuberosus	COL	TPL	Accepted	Ambiguous
Leontodon tuberosus	EOL	TPL	Accepted	Ambiguous
Draba aizoides	COL	TPL	Accepted	Ambiguous
Draba aizoides	EOL	TPL	Accepted	Ambiguous
Schinus johnstonii	COL	EOL	Accepted	Synonym
Schinus johnstonii	EOL	TPL	Synonym	Accepted
Hypericum elodes	COL	TPL	Accepted	Ambiguous
Hypericum elodes	EOL	TPL	Accepted	Ambiguous
Erysimum mutabile	COL	TPL	Accepted	Ambiguous
Erysimum mutabile	EOL	TPL	Accepted	Ambiguous
Achillea nobilis	COL	TPL	Accepted	Ambiguous
Achillea nobilis	EOL	TPL	Accepted	Ambiguous
Hieracium lawsonii	COL	TPL	Accepted	Ambiguous
Hieracium lawsonii	EOL	TPL	Accepted	Ambiguous
Sedum ewersii	COL	TPL	Synonym	Accepted
Sedum ewersii	EOL	TPL	Synonym	Accepted
Sibbaldia tridentata	COL	EOL	Accepted	Ambiguous
Sibbaldia tridentata	COL	TPL	Accepted	Unresolved
Sibbaldia tridentata	EOL	TPL	Ambiguous	Unresolved
Alhagi pseudalhagi	COL	TPL	Synonym	Ambiguous
Alhagi pseudalhagi	EOL	TPL	Synonym	Ambiguous
Buchloe dactyloides	COL	EOL	Synonym	Accepted
Buchloe dactyloides	COL	TPL	Synonym	Accepted
Alyssum wulfenianum	COL	TPL	Accepted	Ambiguous
Alyssum wulfenianum	EOL	TPL	Accepted	Ambiguous
Sorbus intermedia	COL	TPL	Accepted	Ambiguous
Sorbus intermedia	EOL	TPL	Accepted	Ambiguous
Sedum spurium	COL	TPL	Synonym	Accepted
Sedum spurium	EOL	TPL	Synonym	Accepted
Faucaria britteniae	COL	TPL	Accepted	Synonym
Faucaria britteniae	EOL	TPL	Accepted	Synonym
Aristolochia bodamae	COL	TPL	Accepted	Synonym
Aristolochia bodamae	EOL	TPL	Accepted	Synonym
Sedum praealtum	COL	EOL	Synonym	Accepted
Sedum praealtum	COL	TPL	Synonym	Accepted
Sedum spectabile	COL	TPL	Synonym	Accepted
Sedum spectabile	EOL	TPL	Synonym	Accepted
Epiphyllum stenopetalum	COL	EOL	Synonym	Accepted
Epiphyllum stenopetalum	EOL	TPL	Accepted	Synonym
Helichrysum foetidum	COL	EOL	Ambiguous	Accepted
Helichrysum foetidum	EOL	TPL	Accepted	Ambiguous
Bupleurum longifolium	COL	EOL	Ambiguous	Accepted
Bupleurum longifolium	COL	TPL	Ambiguous	Accepted
Morina nepalensis	COL	EOL	Synonym	Accepted
Morina nepalensis	COL	TPL	Synonym	Accepted
Dianthus subacaulis subsp. brachyanthus	COL	EOL	Synonym	Accepted
Dianthus subacaulis subsp. brachyanthus	EOL	TPL	Accepted	Synonym
Carex laevigata	COL	TPL	Accepted	Ambiguous
Carex laevigata	EOL	TPL	Accepted	Ambiguous
Odontites vulgaris	COL	EOL	Accepted	Ambiguous
Odontites vulgaris	COL	TPL	Accepted	Unresolved
Odontites vulgaris	EOL	TPL	Ambiguous	Unresolved
Melanochyla auriculata	COL	TPL	Accepted	Unresolved
Melanochyla auriculata	EOL	TPL	Accepted	Unresolved
Laserpitium halleri	COL	EOL	Ambiguous	Accepted
Laserpitium halleri	COL	TPL	Ambiguous	Accepted
Noccaea montana	COL	EOL	Synonym	Ambiguous
Noccaea montana	EOL	TPL	Ambiguous	Synonym
Potentilla erecta	COL	TPL	Accepted	Ambiguous
Potentilla erecta	EOL	TPL	Accepted	Ambiguous
Geum molle	COL	TPL	Accepted	Ambiguous
Geum molle	EOL	TPL	Accepted	Ambiguous
Hieracium villosum	COL	EOL	Ambiguous	Accepted
Hieracium villosum	EOL	TPL	Accepted	Ambiguous
Cotoneaster brandisii	EOL	TPL	Accepted	Unresolved
Veronica montana	COL	TPL	Accepted	Ambiguous
Veronica montana	EOL	TPL	Accepted	Ambiguous
Potentilla gracilis	COL	EOL	Accepted	Ambiguous
Potentilla gracilis	COL	TPL	Accepted	Ambiguous
Allium nigrum	COL	TPL	Accepted	Ambiguous
Allium nigrum	EOL	TPL	Accepted	Ambiguous
Viburnum treleasei	EOL	TPL	Accepted	Unresolved
Anarrhinum forskaohlii	COL	TPL	Accepted	Unresolved
Agrostis rupestris	COL	TPL	Accepted	Ambiguous
Agrostis rupestris	EOL	TPL	Accepted	Ambiguous
Avenula bromoides	COL	EOL	Synonym	Ambiguous
Avenula bromoides	EOL	TPL	Ambiguous	Synonym
Moltkia aurea	COL	TPL	Accepted	Unresolved
Moltkia aurea	EOL	TPL	Accepted	Unresolved
Spiraea corymbosa	COL	EOL	Ambiguous	Accepted
Spiraea corymbosa	EOL	TPL	Accepted	Ambiguous
Athamanta cretensis	COL	EOL	Ambiguous	Accepted
Athamanta cretensis	COL	TPL	Ambiguous	Accepted
Haworthia cassytha	EOL	TPL	Accepted	Unresolved
Dryopteris xanthomelas	COL	EOL	Accepted	Synonym
Dryopteris xanthomelas	COL	TPL	Accepted	Synonym
Ajuga pyramidalis	COL	TPL	Accepted	Ambiguous
Ajuga pyramidalis	EOL	TPL	Accepted	Ambiguous
Coryphantha maiz-tablasensis	COL	TPL	Accepted	Ambiguous
Coryphantha maiz-tablasensis	EOL	TPL	Accepted	Ambiguous
Rheum nepalense	COL	TPL	Synonym	Unresolved
Achillea collina	COL	TPL	Accepted	Ambiguous
Achillea collina	EOL	TPL	Accepted	Ambiguous
Eragrostis albensis	COL	EOL	Synonym	Accepted
Eragrostis albensis	EOL	TPL	Accepted	Synonym
Heuchera grossulariifolia	COL	TPL	Accepted	Synonym
Heuchera grossulariifolia	EOL	TPL	Accepted	Synonym
Alyssum repens subsp. trichostachyum	COL	TPL	Accepted	Synonym
Alyssum repens subsp. trichostachyum	EOL	TPL	Accepted	Synonym
Artemisia caerulescens subsp. gallica	COL	TPL	Accepted	Ambiguous
Artemisia caerulescens subsp. gallica	EOL	TPL	Accepted	Ambiguous
Cotoneaster forrestii	COL	EOL	Synonym	Accepted
Cotoneaster forrestii	COL	TPL	Synonym	Accepted
Thevetia peruviana	COL	EOL	Synonym	Accepted
Thevetia peruviana	EOL	TPL	Accepted	Synonym
Schizanthus wisetonensis	EOL	TPL	Synonym	Unresolved
Scorzonera hirsuta	COL	EOL	Ambiguous	Synonym
Scorzonera hirsuta	EOL	TPL	Synonym	Ambiguous
Patrinia villosa	COL	TPL	Accepted	Ambiguous
Patrinia villosa	EOL	TPL	Accepted	Ambiguous
Calamagrostis arundinacea	COL	TPL	Accepted	Ambiguous
Calamagrostis arundinacea	EOL	TPL	Accepted	Ambiguous
Geranium koraiense	COL	TPL	Synonym	Unresolved
Geranium koraiense	EOL	TPL	Synonym	Unresolved
Pellaea calomelanos	COL	EOL	Accepted	Synonym
Pellaea calomelanos	EOL	TPL	Synonym	Accepted
Acacia cavenia	COL	TPL	Synonym	Ambiguous
Acacia cavenia	EOL	TPL	Synonym	Ambiguous
Jasminum humile	COL	TPL	Accepted	Ambiguous
Jasminum humile	EOL	TPL	Accepted	Ambiguous
Gleditsia macrantha	COL	EOL	Synonym	Accepted
Gleditsia macrantha	EOL	TPL	Accepted	Synonym
Genista spachiana	COL	EOL	Accepted	Ambiguous
Genista spachiana	EOL	TPL	Ambiguous	Accepted
Dianthus petraeus	COL	TPL	Accepted	Ambiguous
Dianthus petraeus	EOL	TPL	Accepted	Ambiguous
Teucrium nuchense	COL	EOL	Synonym	Accepted
Teucrium nuchense	EOL	TPL	Accepted	Synonym
Prunus serotina	COL	TPL	Accepted	Ambiguous
Prunus serotina	EOL	TPL	Accepted	Ambiguous
Artemisia alba	COL	TPL	Accepted	Ambiguous
Artemisia alba	EOL	TPL	Accepted	Ambiguous
Rosa obtusifolia	COL	TPL	Accepted	Ambiguous
Rosa obtusifolia	EOL	TPL	Accepted	Ambiguous
Physocarpus ribesifolia	EOL	TPL	Accepted	Unresolved
Lilaeopsis carolinensis	COL	EOL	Accepted	Ambiguous
Lilaeopsis carolinensis	EOL	TPL	Ambiguous	Accepted
Amsinckia calycina	COL	EOL	Accepted	Ambiguous
Amsinckia calycina	EOL	TPL	Ambiguous	Accepted
Tagetes tenuifolia	COL	TPL	Accepted	Ambiguous
Tagetes tenuifolia	EOL	TPL	Accepted	Ambiguous
Myosotis scorpioides subsp. scorpioides	COL	EOL	Accepted	Synonym
Senecio rowleyanus	COL	EOL	Accepted	Ambiguous
Senecio rowleyanus	COL	TPL	Accepted	Ambiguous
Allium subhirsutum	COL	TPL	Accepted	Ambiguous
Allium subhirsutum	EOL	TPL	Accepted	Ambiguous
Apium australe	COL	EOL	Synonym	Ambiguous
Apium australe	COL	TPL	Synonym	Accepted
Apium australe	EOL	TPL	Ambiguous	Accepted
Clematis chinensis	COL	TPL	Accepted	Ambiguous
Clematis chinensis	EOL	TPL	Accepted	Ambiguous
Cotoneaster duthieanus	COL	EOL	Synonym	Accepted
Cotoneaster duthieanus	COL	TPL	Synonym	Accepted
Dianthus pubescens	COL	EOL	Ambiguous	Accepted
Dianthus pubescens	EOL	TPL	Accepted	Ambiguous
Cupressus lusitanica	COL	EOL	Accepted	Ambiguous
Cupressus lusitanica	EOL	TPL	Ambiguous	Accepted
Medinilla myriantha	COL	TPL	Synonym	Unresolved
Medinilla myriantha	EOL	TPL	Synonym	Unresolved
Cupressus macrocarpa	COL	TPL	Accepted	Ambiguous
Cupressus macrocarpa	EOL	TPL	Accepted	Ambiguous
Pinus rigida	COL	TPL	Accepted	Ambiguous
Pinus rigida	EOL	TPL	Accepted	Ambiguous
Penstemon tubiflorus	COL	TPL	Accepted	Unresolved
Penstemon tubiflorus	EOL	TPL	Accepted	Unresolved
Acer laxiflorum	COL	EOL	Synonym	Accepted
Acer laxiflorum	EOL	TPL	Accepted	Synonym
Campanula bellidifolia	COL	TPL	Accepted	Ambiguous
Campanula bellidifolia	EOL	TPL	Accepted	Ambiguous
Aglaonema crispum	COL	EOL	Synonym	Accepted
Aglaonema crispum	COL	TPL	Synonym	Accepted
Rubus ulmifolius	COL	EOL	Accepted	Ambiguous
Rubus ulmifolius	COL	TPL	Accepted	Ambiguous
Helianthus x laetiflorus	EOL	TPL	Synonym	Accepted
Rosa marretii	COL	EOL	Synonym	Accepted
Rosa marretii	EOL	TPL	Accepted	Synonym
Hedysarum alpinum	COL	TPL	Accepted	Ambiguous
Hedysarum alpinum	EOL	TPL	Accepted	Ambiguous
Potentilla aurea	COL	TPL	Accepted	Ambiguous
Potentilla aurea	EOL	TPL	Accepted	Ambiguous
Sorbus hybrida	COL	TPL	Accepted	Ambiguous
Sorbus hybrida	EOL	TPL	Accepted	Ambiguous
Cynara humilis	COL	TPL	Accepted	Ambiguous
Cynara humilis	EOL	TPL	Accepted	Ambiguous
Prunus dulcis	COL	EOL	Accepted	Synonym
Prunus dulcis	COL	TPL	Accepted	Ambiguous
Prunus dulcis	EOL	TPL	Synonym	Ambiguous
Prunus divaricata	COL	EOL	Synonym	Accepted
Prunus divaricata	COL	TPL	Synonym	Ambiguous
Prunus divaricata	EOL	TPL	Accepted	Ambiguous
Limonium sinuatum	COL	EOL	Ambiguous	Accepted
Limonium sinuatum	COL	TPL	Ambiguous	Accepted
Heliconia bihai	COL	TPL	Accepted	Ambiguous
Heliconia bihai	EOL	TPL	Accepted	Ambiguous
Myrciaria cauliflora	EOL	TPL	Ambiguous	Synonym
Cucumis zeyheri	COL	EOL	Accepted	Synonym
Cucumis zeyheri	EOL	TPL	Synonym	Accepted
Xeranthemum inapertum	COL	TPL	Accepted	Ambiguous
Xeranthemum inapertum	EOL	TPL	Accepted	Ambiguous
Agrimonia repens	COL	EOL	Accepted	Ambiguous
Agrimonia repens	COL	TPL	Accepted	Ambiguous
Vernonia glauca	EOL	TPL	Accepted	Ambiguous
Caryopteris x clandonensis	EOL	TPL	Synonym	Unresolved
Philadelphus x virginalis	EOL	TPL	Synonym	Unresolved
Psoralea pinnata	COL	TPL	Accepted	Ambiguous
Psoralea pinnata	EOL	TPL	Accepted	Ambiguous
Sonchus tenerrimus	COL	TPL	Accepted	Ambiguous
Sonchus tenerrimus	EOL	TPL	Accepted	Ambiguous
Bromus japonicus	COL	TPL	Accepted	Ambiguous
Bromus japonicus	EOL	TPL	Accepted	Ambiguous
Laserpitium alpinum	COL	TPL	Accepted	Synonym
Laserpitium alpinum	EOL	TPL	Accepted	Synonym
Utricularia prehensilis	COL	EOL	Accepted	Ambiguous
Utricularia prehensilis	EOL	TPL	Ambiguous	Accepted
Arabis ciliata	COL	TPL	Accepted	Ambiguous
Arabis ciliata	EOL	TPL	Accepted	Ambiguous
Ulmus pumila	COL	TPL	Accepted	Ambiguous
Ulmus pumila	EOL	TPL	Accepted	Ambiguous
Dryas hookeriana	COL	EOL	Synonym	Accepted
Dryas hookeriana	EOL	TPL	Accepted	Synonym
Scabiosa prolifera	COL	EOL	Ambiguous	Synonym
Scabiosa prolifera	COL	TPL	Ambiguous	Unresolved
Scabiosa prolifera	EOL	TPL	Synonym	Unresolved
Vicia ervilla	EOL	TPL	Accepted	Unresolved
Olax scandens	COL	TPL	Accepted	Unresolved
Olax scandens	EOL	TPL	Accepted	Unresolved
Ardisia solanacea	COL	EOL	Synonym	Accepted
Ardisia solanacea	COL	TPL	Synonym	Accepted
Petasites hybridus	COL	TPL	Accepted	Ambiguous
Petasites hybridus	EOL	TPL	Accepted	Ambiguous
Lysimachia davurica	COL	EOL	Synonym	Accepted
Lysimachia davurica	COL	TPL	Synonym	Accepted
Cheilanthes argentea	COL	TPL	Synonym	Accepted
Cheilanthes argentea	EOL	TPL	Synonym	Accepted
Echinopsis calliantholilacina	COL	EOL	Synonym	Accepted
Echinopsis calliantholilacina	COL	TPL	Synonym	Accepted
Kalanchoe grandiflora	COL	TPL	Accepted	Ambiguous
Kalanchoe grandiflora	EOL	TPL	Accepted	Ambiguous
Rosularia platyphylla	COL	EOL	Accepted	Ambiguous
Rosularia platyphylla	EOL	TPL	Ambiguous	Accepted
Huernia keniensis	COL	TPL	Accepted	Unresolved
Huernia keniensis	EOL	TPL	Accepted	Unresolved
Brasilicactus graessneri	COL	EOL	Synonym	Accepted
Brasilicactus graessneri	COL	TPL	Synonym	Unresolved
Brasilicactus graessneri	EOL	TPL	Accepted	Unresolved
Rudbeckia bicolor	COL	TPL	Synonym	Accepted
Rudbeckia bicolor	EOL	TPL	Synonym	Accepted
Dianthus seguieri	COL	TPL	Accepted	Ambiguous
Dianthus seguieri	EOL	TPL	Accepted	Ambiguous
Kniphofia triangularis	COL	EOL	Accepted	Ambiguous
Kniphofia triangularis	EOL	TPL	Ambiguous	Accepted
Coffea excelsa	COL	EOL	Synonym	Ambiguous
Coffea excelsa	EOL	TPL	Ambiguous	Synonym
Carex polyphylla	EOL	TPL	Accepted	Unresolved
Anthemis triumfettii	COL	EOL	Synonym	Ambiguous
Anthemis triumfettii	EOL	TPL	Ambiguous	Synonym
Anthurium muyunense	EOL	TPL	Accepted	Unresolved
Filago pyramidata	COL	TPL	Accepted	Ambiguous
Filago pyramidata	EOL	TPL	Accepted	Ambiguous
Trientalis europaea	COL	TPL	Accepted	Synonym
Trientalis europaea	EOL	TPL	Accepted	Synonym
Stemmadenia tomentosa	COL	EOL	Synonym	Accepted
Stemmadenia tomentosa	EOL	TPL	Accepted	Synonym
Aristolochia gigantea	COL	TPL	Accepted	Ambiguous
Aristolochia gigantea	EOL	TPL	Accepted	Ambiguous
Pithecellobium discolor	COL	EOL	Accepted	Synonym
Pithecellobium discolor	COL	TPL	Accepted	Ambiguous
Pithecellobium discolor	EOL	TPL	Synonym	Ambiguous
Cornus sanguinea	COL	TPL	Accepted	Ambiguous
Cornus sanguinea	EOL	TPL	Accepted	Ambiguous
Crassula cordata	COL	TPL	Accepted	Ambiguous
Crassula cordata	EOL	TPL	Accepted	Ambiguous
Cotoneaster persicus	COL	TPL	Accepted	Unresolved
Cotoneaster persicus	EOL	TPL	Accepted	Unresolved
Rudbeckia speciosa	COL	TPL	Accepted	Ambiguous
Rudbeckia speciosa	EOL	TPL	Accepted	Ambiguous
Bryophyllum fedtschenkoi	COL	TPL	Synonym	Accepted
Bryophyllum fedtschenkoi	EOL	TPL	Synonym	Accepted
Hieracium auriculoides	EOL	TPL	Accepted	Synonym
Rubus gremlii	COL	TPL	Accepted	Ambiguous
Rubus gremlii	EOL	TPL	Accepted	Ambiguous
Costus amazonicus	COL	TPL	Accepted	Ambiguous
Costus amazonicus	EOL	TPL	Accepted	Ambiguous
Euphorbia grandidens	COL	TPL	Accepted	Ambiguous
Euphorbia grandidens	EOL	TPL	Accepted	Ambiguous
Lonicera x bella	EOL	TPL	Synonym	Unresolved
Mammillaria xochipilli	COL	TPL	Synonym	Unresolved
Mammillaria xochipilli	EOL	TPL	Synonym	Unresolved
Rosa rubiginosa	COL	EOL	Accepted	Ambiguous
Rosa rubiginosa	COL	TPL	Accepted	Ambiguous
Acokanthera oblongifolia	COL	TPL	Accepted	Ambiguous
Acokanthera oblongifolia	EOL	TPL	Accepted	Ambiguous
Cotoneaster pseudoambiguus	COL	EOL	Synonym	Accepted
Cotoneaster pseudoambiguus	COL	TPL	Synonym	Accepted
Olearia traversii	COL	TPL	Accepted	Ambiguous
Olearia traversii	EOL	TPL	Accepted	Ambiguous
Pelargonium viscosissimum	EOL	TPL	Accepted	Unresolved
Armeria maritima subsp. maritima	EOL	TPL	Accepted	Synonym
Cotoneaster dojamensis	EOL	TPL	Accepted	Unresolved
Melocactus curvispinus subsp. caesius	COL	EOL	Accepted	Synonym
Melocactus curvispinus subsp. caesius	EOL	TPL	Synonym	Accepted
Thlaspi macrophyllum	COL	TPL	Synonym	Accepted
Thlaspi macrophyllum	EOL	TPL	Synonym	Accepted
Koeleria glauca	COL	TPL	Accepted	Ambiguous
Koeleria glauca	EOL	TPL	Accepted	Ambiguous
Sanguisorba tenuifolia	COL	TPL	Accepted	Ambiguous
Sanguisorba tenuifolia	EOL	TPL	Accepted	Ambiguous
Cyperus longus	COL	TPL	Accepted	Ambiguous
Cyperus longus	EOL	TPL	Accepted	Ambiguous
Platycerium willinckii	COL	EOL	Synonym	Accepted
Platycerium willinckii	COL	TPL	Synonym	Unresolved
Platycerium willinckii	EOL	TPL	Accepted	Unresolved
Verbena bipinnatifida	COL	TPL	Synonym	Ambiguous
Verbena bipinnatifida	EOL	TPL	Synonym	Ambiguous
Myrtus communis	EOL	TPL	Accepted	Ambiguous
Iris hexagona	COL	EOL	Accepted	Synonym
Iris hexagona	EOL	TPL	Synonym	Accepted
Actinidia kolomikta	COL	EOL	Accepted	Synonym
Actinidia kolomikta	EOL	TPL	Synonym	Accepted
Brownea macrophylla	COL	TPL	Accepted	Ambiguous
Brownea macrophylla	EOL	TPL	Accepted	Ambiguous
Crepis vesicaria	COL	TPL	Accepted	Ambiguous
Crepis vesicaria	EOL	TPL	Accepted	Ambiguous
Delphinium altaicum	COL	EOL	Synonym	Accepted
Delphinium altaicum	COL	TPL	Synonym	Accepted
Acacia calamifolia	COL	TPL	Accepted	Ambiguous
Acacia calamifolia	EOL	TPL	Accepted	Ambiguous
Platycerium ridleyi	COL	TPL	Accepted	Unresolved
Platycerium ridleyi	EOL	TPL	Accepted	Unresolved
Withania aristata	COL	TPL	Accepted	Unresolved
Withania aristata	EOL	TPL	Accepted	Unresolved
Cerastium grandiflorum	COL	TPL	Accepted	Ambiguous
Cerastium grandiflorum	EOL	TPL	Accepted	Ambiguous
Sibiraea angustata	COL	EOL	Accepted	Ambiguous
Sibiraea angustata	COL	TPL	Accepted	Ambiguous
Centaurea sonchifolia	COL	TPL	Synonym	Ambiguous
Centaurea sonchifolia	EOL	TPL	Synonym	Ambiguous
Verbena hybrida	EOL	TPL	Synonym	Accepted
Gentiana macrophylla	COL	TPL	Accepted	Ambiguous
Gentiana macrophylla	EOL	TPL	Accepted	Ambiguous
Physalis pruinosa	COL	EOL	Accepted	Synonym
Physalis pruinosa	EOL	TPL	Synonym	Accepted
Fuchsia arborescens	COL	EOL	Synonym	Accepted
Fuchsia arborescens	COL	TPL	Synonym	Accepted
Asplenium ruta	COL	TPL	Synonym	Unresolved
Buddleja caryopteridifolia	COL	TPL	Synonym	Accepted
Buddleja caryopteridifolia	EOL	TPL	Synonym	Accepted
Sarcococca hookeriana	COL	TPL	Accepted	Synonym
Sarcococca hookeriana	EOL	TPL	Accepted	Synonym
Rheum rhaponticum	COL	TPL	Accepted	Ambiguous
Rheum rhaponticum	EOL	TPL	Accepted	Ambiguous
Oenothera fallax	COL	TPL	Accepted	Unresolved
Oenothera fallax	EOL	TPL	Accepted	Unresolved
Sibiraea altaiensis	COL	EOL	Synonym	Accepted
Sibiraea altaiensis	EOL	TPL	Accepted	Synonym
Alyxia daphnoides	COL	EOL	Synonym	Accepted
Alyxia daphnoides	EOL	TPL	Accepted	Synonym
Artemisia dracunculus	COL	TPL	Accepted	Ambiguous
Artemisia dracunculus	EOL	TPL	Accepted	Ambiguous
Digitalis fulva	EOL	TPL	Accepted	Unresolved
Clematis hexapetala	COL	TPL	Accepted	Ambiguous
Clematis hexapetala	EOL	TPL	Accepted	Ambiguous
Festuca scariosa	COL	TPL	Accepted	Ambiguous
Festuca scariosa	EOL	TPL	Accepted	Ambiguous
Lamium galeobdolon	COL	TPL	Accepted	Ambiguous
Lamium galeobdolon	EOL	TPL	Accepted	Ambiguous
Helenium amarum	COL	TPL	Accepted	Unresolved
Helenium amarum	EOL	TPL	Accepted	Unresolved
Ipomoea hederacea	COL	TPL	Accepted	Synonym
Ipomoea hederacea	EOL	TPL	Accepted	Synonym
Vaccinium vitis-idaea subsp. vitis-idaea	COL	EOL	Accepted	Synonym
Asplenium ruta-muraria subsp. dolomiticum	COL	EOL	Synonym	Accepted
Papaver triniifolium	COL	TPL	Accepted	Unresolved
Papaver triniifolium	EOL	TPL	Accepted	Unresolved
Dodecatheon conjugens	COL	EOL	Accepted	Synonym
Dodecatheon conjugens	EOL	TPL	Synonym	Accepted
Geum intermedium	COL	TPL	Accepted	Ambiguous
Geum intermedium	EOL	TPL	Accepted	Ambiguous
Scleria racemosa	COL	TPL	Accepted	Ambiguous
Scleria racemosa	EOL	TPL	Accepted	Ambiguous
Rebutia graciliflora	COL	TPL	Synonym	Unresolved
Rebutia graciliflora	EOL	TPL	Synonym	Unresolved
Heracleum dissectum	COL	TPL	Accepted	Synonym
Heracleum dissectum	EOL	TPL	Accepted	Synonym
Koeleria lobata	COL	EOL	Ambiguous	Synonym
Koeleria lobata	EOL	TPL	Synonym	Ambiguous
Boykinia jamesii	COL	EOL	Accepted	Synonym
Boykinia jamesii	EOL	TPL	Synonym	Accepted
Althaea hirsuta	COL	EOL	Ambiguous	Accepted
Althaea hirsuta	EOL	TPL	Accepted	Ambiguous
Canna hybrida	EOL	TPL	Accepted	Unresolved
Hypericum patulum	COL	EOL	Accepted	Synonym
Hypericum patulum	EOL	TPL	Synonym	Accepted
Cephalaria laevigata	COL	TPL	Accepted	Ambiguous
Securinega suffruticosa	COL	EOL	Synonym	Accepted
Securinega suffruticosa	EOL	TPL	Accepted	Synonym
Lonicera sovetkinae	COL	TPL	Accepted	Unresolved
Lonicera sovetkinae	EOL	TPL	Accepted	Unresolved
Erigeron linearis	COL	TPL	Accepted	Ambiguous
Erigeron linearis	EOL	TPL	Accepted	Ambiguous
Symphytum grandiflorum	COL	TPL	Accepted	Unresolved
Symphytum grandiflorum	EOL	TPL	Accepted	Unresolved
Dicentra spectabilis	COL	TPL	Accepted	Synonym
Dicentra spectabilis	EOL	TPL	Accepted	Synonym
Carex strigosa	COL	TPL	Accepted	Ambiguous
Carex strigosa	EOL	TPL	Accepted	Ambiguous
Aechmea nudicaulis var. nudicaulis	COL	TPL	Accepted	Synonym
Aechmea nudicaulis var. nudicaulis	EOL	TPL	Accepted	Synonym
Lomatia longifolia	COL	TPL	Synonym	Unresolved
Chenopodium giganteum	COL	EOL	Accepted	Ambiguous
Chenopodium giganteum	EOL	TPL	Ambiguous	Accepted
Halimodendron halodendron	COL	TPL	Accepted	Ambiguous
Halimodendron halodendron	EOL	TPL	Accepted	Ambiguous
Alyssum murale	EOL	TPL	Accepted	Ambiguous
Hepatica transsilvanica	COL	EOL	Accepted	Synonym
Hepatica transsilvanica	COL	TPL	Accepted	Synonym
Bupleurum rotundifolium	COL	TPL	Accepted	Ambiguous
Bupleurum rotundifolium	EOL	TPL	Accepted	Ambiguous
Rosa kokanica	COL	TPL	Accepted	Ambiguous
Rosa kokanica	EOL	TPL	Accepted	Ambiguous
Prunus cerasus	COL	TPL	Accepted	Ambiguous
Prunus cerasus	EOL	TPL	Accepted	Ambiguous
Aristolochia trilobata	COL	TPL	Accepted	Ambiguous
Aristolochia trilobata	EOL	TPL	Accepted	Ambiguous
Waldsteinia fragarioides	COL	EOL	Synonym	Ambiguous
Waldsteinia fragarioides	COL	TPL	Synonym	Accepted
Waldsteinia fragarioides	EOL	TPL	Ambiguous	Accepted
Rosa nitidula	COL	EOL	Synonym	Accepted
Rosa nitidula	COL	TPL	Synonym	Unresolved
Rosa nitidula	EOL	TPL	Accepted	Unresolved
Lappula deflexa	COL	TPL	Synonym	Ambiguous
Lappula deflexa	EOL	TPL	Synonym	Ambiguous
Hypericum canariense	COL	TPL	Accepted	Ambiguous
Hypericum canariense	EOL	TPL	Accepted	Ambiguous
Geum aleppicum	COL	TPL	Accepted	Ambiguous
Geum aleppicum	EOL	TPL	Accepted	Ambiguous
Rindera lanata	COL	TPL	Accepted	Ambiguous
Rindera lanata	EOL	TPL	Accepted	Ambiguous
Salsola vermiculata	COL	EOL	Accepted	Ambiguous
Salsola vermiculata	EOL	TPL	Ambiguous	Accepted
Hieracium amplexicaule	COL	TPL	Accepted	Ambiguous
Hieracium amplexicaule	EOL	TPL	Accepted	Ambiguous
Artemisia maritima	COL	EOL	Ambiguous	Accepted
Artemisia maritima	EOL	TPL	Accepted	Ambiguous
Chaenorhinum origanifolium	COL	TPL	Accepted	Ambiguous
Chaenorhinum origanifolium	EOL	TPL	Accepted	Ambiguous
Allagopappus dichotomus	COL	EOL	Synonym	Accepted
Allagopappus dichotomus	EOL	TPL	Accepted	Synonym
Caiophora lateritia	COL	TPL	Accepted	Ambiguous
Caiophora lateritia	EOL	TPL	Accepted	Ambiguous
Doronicum plantagineum	COL	TPL	Accepted	Ambiguous
Doronicum plantagineum	EOL	TPL	Accepted	Ambiguous
Sanguisorba minor	COL	TPL	Accepted	Ambiguous
Sanguisorba minor	EOL	TPL	Accepted	Ambiguous
Pulsatilla regeliana	COL	TPL	Synonym	Unresolved
Hieracium hoppeanum	COL	EOL	Ambiguous	Accepted
Hieracium hoppeanum	EOL	TPL	Accepted	Ambiguous
Thalictrum dipterocarpum	COL	EOL	Synonym	Accepted
Thalictrum dipterocarpum	EOL	TPL	Accepted	Synonym
Silene lagunensis	COL	TPL	Accepted	Unresolved
Silene lagunensis	EOL	TPL	Accepted	Unresolved
Cynometra ramiflora	COL	TPL	Accepted	Ambiguous
Cynometra ramiflora	EOL	TPL	Accepted	Ambiguous
Spiraea x billiardii	EOL	TPL	Synonym	Accepted
Acaena sericea	COL	EOL	Accepted	Ambiguous
Acaena sericea	COL	TPL	Accepted	Ambiguous
Merremia mammosa	COL	TPL	Accepted	Unresolved
Parolinia glabriuscula	EOL	TPL	Accepted	Unresolved
Draba dedeana	COL	EOL	Accepted	Ambiguous
Draba dedeana	EOL	TPL	Ambiguous	Accepted
Centaurea jacea subsp. subjacea	COL	EOL	Synonym	Accepted
Centaurea jacea subsp. subjacea	EOL	TPL	Accepted	Synonym
Aubrieta scardica	COL	EOL	Synonym	Accepted
Aubrieta scardica	COL	TPL	Synonym	Accepted
Serratula coriacea	COL	TPL	Accepted	Ambiguous
Serratula coriacea	EOL	TPL	Accepted	Ambiguous
Heliconia hirsuta	COL	TPL	Accepted	Ambiguous
Heliconia hirsuta	EOL	TPL	Accepted	Ambiguous
Quercus ilex	COL	TPL	Accepted	Ambiguous
Quercus ilex	EOL	TPL	Accepted	Ambiguous
Salvia stenophylla	COL	EOL	Accepted	Ambiguous
Salvia stenophylla	COL	TPL	Accepted	Ambiguous
Linum boreale	COL	EOL	Synonym	Accepted
Linum boreale	EOL	TPL	Accepted	Synonym
Galium schultesii	COL	EOL	Ambiguous	Synonym
Galium schultesii	EOL	TPL	Synonym	Ambiguous
Cerastium pyrenaicum	COL	TPL	Accepted	Synonym
Cerastium pyrenaicum	EOL	TPL	Accepted	Synonym
Cornus capitata	EOL	TPL	Accepted	Ambiguous
Viburnum orientale	COL	TPL	Accepted	Unresolved
Viburnum orientale	EOL	TPL	Accepted	Unresolved
Hordeum vulgare var. nigrum	COL	EOL	Synonym	Accepted
Phlomis pratensis	COL	EOL	Synonym	Ambiguous
Phlomis pratensis	EOL	TPL	Ambiguous	Synonym
Geranium gracile	COL	TPL	Accepted	Ambiguous
Geranium gracile	EOL	TPL	Accepted	Ambiguous
Rubus saxatilis	COL	EOL	Accepted	Ambiguous
Rubus saxatilis	COL	TPL	Accepted	Ambiguous
Pittosporum ferrugineum	COL	TPL	Accepted	Unresolved
Pittosporum ferrugineum	EOL	TPL	Accepted	Unresolved
Heliopsis helianthoides	COL	TPL	Accepted	Ambiguous
Heliopsis helianthoides	EOL	TPL	Accepted	Ambiguous
Acantholimon hohenackeri	COL	EOL	Ambiguous	Accepted
Acantholimon hohenackeri	EOL	TPL	Accepted	Ambiguous
Vicia serratifolia	COL	TPL	Accepted	Ambiguous
Vicia serratifolia	EOL	TPL	Accepted	Ambiguous
Typha shuttleworthii	COL	TPL	Accepted	Ambiguous
Typha shuttleworthii	EOL	TPL	Accepted	Ambiguous
Crataegus acclivis	EOL	TPL	Accepted	Synonym
Aquilegia viscosa	COL	TPL	Accepted	Ambiguous
Aquilegia viscosa	EOL	TPL	Accepted	Ambiguous
Dysosma pleiantha	COL	EOL	Synonym	Accepted
Dysosma pleiantha	COL	TPL	Synonym	Accepted
Pulicaria vulgaris	EOL	TPL	Synonym	Accepted
Helminthotheca echioides	COL	TPL	Accepted	Ambiguous
Helminthotheca echioides	EOL	TPL	Accepted	Ambiguous
Acacia armata	COL	EOL	Accepted	Synonym
Acacia armata	COL	TPL	Accepted	Synonym
Onosma fastigiata	COL	EOL	Synonym	Accepted
Onosma fastigiata	COL	TPL	Synonym	Accepted
Alnus rubra	COL	TPL	Accepted	Ambiguous
Alnus rubra	EOL	TPL	Accepted	Ambiguous
Pterocarpus indicus	COL	TPL	Accepted	Ambiguous
Pterocarpus indicus	EOL	TPL	Accepted	Ambiguous
Lecanopteris pumila	COL	TPL	Accepted	Unresolved
Lecanopteris pumila	EOL	TPL	Accepted	Unresolved
Cotoneaster nedoluzhkoi	COL	TPL	Accepted	Unresolved
Cotoneaster nedoluzhkoi	EOL	TPL	Accepted	Unresolved
Chrysanthemum maximum	COL	EOL	Accepted	Ambiguous
Chrysanthemum maximum	COL	TPL	Accepted	Ambiguous
Acer grandidentatum	COL	TPL	Accepted	Synonym
Acer grandidentatum	EOL	TPL	Accepted	Synonym
Ariocarpus trigonus	COL	TPL	Accepted	Synonym
Ariocarpus trigonus	EOL	TPL	Accepted	Synonym
Rubus sprengelii	COL	TPL	Accepted	Ambiguous
Rubus sprengelii	EOL	TPL	Accepted	Ambiguous
Belvisia platyrhynchos	EOL	TPL	Ambiguous	Accepted
Cotoneaster floridus	COL	TPL	Accepted	Unresolved
Cotoneaster floridus	EOL	TPL	Accepted	Unresolved
Cortaderia richardii	COL	EOL	Synonym	Accepted
Cortaderia richardii	COL	TPL	Synonym	Accepted
Pellionia repens	COL	EOL	Synonym	Accepted
Pellionia repens	COL	TPL	Synonym	Accepted
Wigginsia tephracantha	COL	TPL	Synonym	Accepted
Wigginsia tephracantha	EOL	TPL	Synonym	Accepted
Prunus fruticosa	COL	TPL	Accepted	Ambiguous
Prunus fruticosa	EOL	TPL	Accepted	Ambiguous
Triticum turgidum	COL	TPL	Accepted	Ambiguous
Triticum turgidum	EOL	TPL	Accepted	Ambiguous
Ephedra negrii	COL	EOL	Synonym	Accepted
Ephedra negrii	EOL	TPL	Accepted	Synonym
Allium angulosum	EOL	TPL	Accepted	Ambiguous
Selaginella involvens	COL	TPL	Accepted	Synonym
Selaginella involvens	EOL	TPL	Accepted	Synonym
Canna x generalis	EOL	TPL	Accepted	Ambiguous
Cotoneaster hissaricus	EOL	TPL	Accepted	Ambiguous
Sorbus norvegica	COL	EOL	Synonym	Accepted
Sorbus norvegica	COL	TPL	Synonym	Accepted
Patrinia triloba	COL	TPL	Accepted	Ambiguous
Patrinia triloba	EOL	TPL	Accepted	Ambiguous
Typha minima	COL	TPL	Accepted	Ambiguous
Typha minima	EOL	TPL	Accepted	Ambiguous
Pittosporum floribundum	COL	EOL	Ambiguous	Synonym
Pittosporum floribundum	COL	TPL	Ambiguous	Synonym
Lathyrus aureus	COL	TPL	Accepted	Ambiguous
Lathyrus aureus	EOL	TPL	Accepted	Ambiguous
Rosa elasmacantha	COL	EOL	Synonym	Accepted
Rosa elasmacantha	COL	TPL	Synonym	Accepted
Persicaria tinctoria	COL	EOL	Accepted	Synonym
Persicaria tinctoria	COL	TPL	Accepted	Ambiguous
Persicaria tinctoria	EOL	TPL	Synonym	Ambiguous
Oxytropis jacquinii	COL	TPL	Accepted	Ambiguous
Oxytropis jacquinii	EOL	TPL	Accepted	Ambiguous
Atriplex prostrata subsp. calotheca	COL	TPL	Accepted	Ambiguous
Atriplex prostrata subsp. calotheca	EOL	TPL	Accepted	Ambiguous
Veronica austriaca subsp. austriaca	COL	EOL	Accepted	Synonym
Mimulus luteus	COL	EOL	Synonym	Ambiguous
Mimulus luteus	COL	TPL	Synonym	Accepted
Mimulus luteus	EOL	TPL	Ambiguous	Accepted
Senecio herreianus	COL	EOL	Accepted	Ambiguous
Senecio herreianus	EOL	TPL	Ambiguous	Accepted
Festuca pseudovina	COL	EOL	Synonym	Accepted
Festuca pseudovina	COL	TPL	Synonym	Accepted
Hieracium bombycinum	COL	TPL	Accepted	Ambiguous
Hieracium bombycinum	EOL	TPL	Accepted	Ambiguous
Campanula lingulata	COL	TPL	Accepted	Ambiguous
Campanula lingulata	EOL	TPL	Accepted	Ambiguous
Datura ferox	COL	EOL	Accepted	Ambiguous
Datura ferox	COL	TPL	Accepted	Ambiguous
Rhododendron poukhanense	COL	TPL	Synonym	Unresolved
Rhododendron poukhanense	EOL	TPL	Synonym	Unresolved
Achillea grandiflora	COL	EOL	Synonym	Accepted
Achillea grandiflora	EOL	TPL	Accepted	Synonym
Festuca quadriflora	COL	EOL	Accepted	Ambiguous
Festuca quadriflora	COL	TPL	Accepted	Ambiguous
Solidago gigantea	COL	TPL	Accepted	Ambiguous
Solidago gigantea	EOL	TPL	Accepted	Ambiguous
Gladiolus x gandavensis	EOL	TPL	Accepted	Unresolved
Senecio trifurcatus	COL	TPL	Accepted	Ambiguous
Senecio trifurcatus	EOL	TPL	Accepted	Ambiguous
Onopordum nervosum	COL	TPL	Accepted	Ambiguous
Onopordum nervosum	EOL	TPL	Accepted	Ambiguous
Trifolium repens	COL	TPL	Accepted	Ambiguous
Trifolium repens	EOL	TPL	Accepted	Ambiguous
Anthemis ruthenica	COL	TPL	Accepted	Ambiguous
Anthemis ruthenica	EOL	TPL	Accepted	Ambiguous
Erysimum diffusum	COL	TPL	Accepted	Ambiguous
Erysimum diffusum	EOL	TPL	Accepted	Ambiguous
Fumaria muralis	COL	TPL	Accepted	Ambiguous
Fumaria muralis	EOL	TPL	Accepted	Ambiguous
Asparagus scandens	COL	TPL	Accepted	Ambiguous
Asparagus scandens	EOL	TPL	Accepted	Ambiguous
Sedum takesimense	COL	EOL	Synonym	Accepted
Sedum takesimense	COL	TPL	Synonym	Unresolved
Sedum takesimense	EOL	TPL	Accepted	Unresolved
Rubus albiflorus	COL	TPL	Accepted	Ambiguous
Rubus albiflorus	EOL	TPL	Accepted	Ambiguous
Anacampseros australiana	COL	EOL	Synonym	Accepted
Anacampseros australiana	EOL	TPL	Accepted	Synonym
Rosa hemisphaerica	COL	TPL	Accepted	Ambiguous
Rosa hemisphaerica	EOL	TPL	Accepted	Ambiguous
Scabiosa owerinii	COL	TPL	Accepted	Unresolved
Scabiosa owerinii	EOL	TPL	Accepted	Unresolved
Rudbeckia fulgida var. fulgida	COL	EOL	Ambiguous	Accepted
Rudbeckia fulgida var. fulgida	COL	TPL	Ambiguous	Accepted
Taraxacum montanum	COL	EOL	Synonym	Accepted
Taraxacum montanum	COL	TPL	Synonym	Ambiguous
Taraxacum montanum	EOL	TPL	Accepted	Ambiguous
Dianthus arenarius subsp. borussicus	COL	TPL	Accepted	Synonym
Dianthus arenarius subsp. borussicus	EOL	TPL	Accepted	Synonym
Agrimonia asiatica	COL	EOL	Synonym	Accepted
Agrimonia asiatica	EOL	TPL	Accepted	Synonym
Annona glabra	COL	TPL	Accepted	Ambiguous
Annona glabra	EOL	TPL	Accepted	Ambiguous
Euphorbia mellifera	COL	TPL	Accepted	Ambiguous
Euphorbia mellifera	EOL	TPL	Accepted	Ambiguous
Schefflera elegantissima	COL	EOL	Accepted	Ambiguous
Schefflera elegantissima	EOL	TPL	Ambiguous	Accepted
Epilobium montanum	COL	TPL	Accepted	Ambiguous
Epilobium montanum	EOL	TPL	Accepted	Ambiguous
Bidens ferulifolia	COL	EOL	Accepted	Ambiguous
Bidens ferulifolia	COL	TPL	Accepted	Ambiguous
Centaurea ceratophylla	COL	TPL	Accepted	Ambiguous
Centaurea ceratophylla	EOL	TPL	Accepted	Ambiguous
Euphrasia minima	COL	TPL	Accepted	Unresolved
Euphrasia minima	EOL	TPL	Accepted	Unresolved
Centaurea jacea subsp. debeauxii	COL	EOL	Synonym	Accepted
Centaurea jacea subsp. debeauxii	EOL	TPL	Accepted	Synonym
Impatiens glandulifera	COL	TPL	Accepted	Ambiguous
Impatiens glandulifera	EOL	TPL	Accepted	Ambiguous
Notocactus ritterianus	COL	TPL	Synonym	Unresolved
Notocactus ritterianus	EOL	TPL	Synonym	Unresolved
Chirita lavandulacea	COL	EOL	Accepted	Synonym
Chirita lavandulacea	COL	TPL	Accepted	Synonym
Asparagus officinalis subsp. prostratus	COL	EOL	Synonym	Accepted
Asparagus officinalis subsp. prostratus	COL	TPL	Synonym	Accepted
Geum capense	COL	TPL	Accepted	Unresolved
Geum capense	EOL	TPL	Accepted	Unresolved
Begonia urticae	COL	EOL	Accepted	Synonym
Begonia urticae	EOL	TPL	Synonym	Accepted
Crambe cordifolia	COL	TPL	Accepted	Ambiguous
Crambe cordifolia	EOL	TPL	Accepted	Ambiguous
Nepeta mussinii	COL	EOL	Synonym	Accepted
Nepeta mussinii	EOL	TPL	Accepted	Synonym
Ferocactus histrix	COL	TPL	Accepted	Ambiguous
Ferocactus histrix	EOL	TPL	Accepted	Ambiguous
Lychnis fulgens	COL	EOL	Synonym	Ambiguous
Lychnis fulgens	COL	TPL	Synonym	Accepted
Lychnis fulgens	EOL	TPL	Ambiguous	Accepted
Adenostyles glabra	COL	EOL	Synonym	Ambiguous
Adenostyles glabra	EOL	TPL	Ambiguous	Synonym
Pulicaria dysenterica	COL	EOL	Accepted	Ambiguous
Pulicaria dysenterica	COL	TPL	Accepted	Ambiguous
Dodecatheon pulchellum subsp. macrocarpum	COL	EOL	Accepted	Synonym
Dodecatheon pulchellum subsp. macrocarpum	EOL	TPL	Synonym	Accepted
Allium senescens subsp. montanum	COL	EOL	Synonym	Ambiguous
Allium senescens subsp. montanum	EOL	TPL	Ambiguous	Synonym
Mitrephora javanica	COL	TPL	Synonym	Unresolved
Mitrephora javanica	EOL	TPL	Synonym	Unresolved
Agrimonia odorata	COL	EOL	Synonym	Accepted
Agrimonia odorata	COL	TPL	Synonym	Ambiguous
Agrimonia odorata	EOL	TPL	Accepted	Ambiguous
Aquilegia thalictrifolia	COL	TPL	Accepted	Ambiguous
Aquilegia thalictrifolia	EOL	TPL	Accepted	Ambiguous
Rhamnus costata	COL	TPL	Accepted	Unresolved
Rhamnus costata	EOL	TPL	Accepted	Unresolved
Ruspolia pseuderanthemoides	COL	TPL	Synonym	Unresolved
Aristolochia macroura	COL	TPL	Accepted	Ambiguous
Aristolochia macroura	EOL	TPL	Accepted	Ambiguous
Rhipsalis virgata	COL	TPL	Synonym	Unresolved
Rhipsalis virgata	EOL	TPL	Synonym	Unresolved
Mammillaria parkinsonii	COL	EOL	Accepted	Ambiguous
Mammillaria parkinsonii	EOL	TPL	Ambiguous	Accepted
Plantago famarae	COL	TPL	Accepted	Unresolved
Plantago famarae	EOL	TPL	Accepted	Unresolved
Brodiaea coronaria	COL	TPL	Accepted	Ambiguous
Brodiaea coronaria	EOL	TPL	Accepted	Ambiguous
Artemisia abrotanum	COL	TPL	Accepted	Ambiguous
Artemisia abrotanum	EOL	TPL	Accepted	Ambiguous
Anagallis foemina	COL	TPL	Accepted	Synonym
Anagallis foemina	EOL	TPL	Accepted	Synonym
Lotus creticus	COL	TPL	Accepted	Ambiguous
Lotus creticus	EOL	TPL	Accepted	Ambiguous
Dodonaea angustissima	COL	EOL	Synonym	Accepted
Dodonaea angustissima	EOL	TPL	Accepted	Synonym
Stephanandra tanakae	COL	EOL	Synonym	Accepted
Stephanandra tanakae	COL	TPL	Synonym	Accepted
Sedum jaliscanum	COL	EOL	Accepted	Synonym
Sedum jaliscanum	EOL	TPL	Synonym	Accepted
Scyphularia pentaphylla	COL	TPL	Synonym	Accepted
Scyphularia pentaphylla	EOL	TPL	Synonym	Accepted
Centaurea montana	EOL	TPL	Accepted	Ambiguous
Mammillaria tenampensis	COL	TPL	Synonym	Unresolved
Mammillaria tenampensis	EOL	TPL	Synonym	Unresolved
Liatris borealis	COL	TPL	Accepted	Ambiguous
Liatris borealis	EOL	TPL	Accepted	Ambiguous
Erysimum ochroleucum	COL	TPL	Synonym	Ambiguous
Erysimum ochroleucum	EOL	TPL	Synonym	Ambiguous
Rosa micrantha	COL	TPL	Accepted	Ambiguous
Rosa micrantha	EOL	TPL	Accepted	Ambiguous
Cerastium tomentosum	COL	TPL	Accepted	Ambiguous
Cerastium tomentosum	EOL	TPL	Accepted	Ambiguous
Calendula arvensis	COL	EOL	Ambiguous	Accepted
Calendula arvensis	EOL	TPL	Accepted	Ambiguous
Aquilegia hybrida	COL	EOL	Synonym	Ambiguous
Aquilegia hybrida	EOL	TPL	Ambiguous	Synonym
Cotoneaster lidjiangensis	COL	EOL	Synonym	Accepted
Cotoneaster lidjiangensis	COL	TPL	Synonym	Accepted
Ludwigia suffruticosa	COL	TPL	Accepted	Ambiguous
Ludwigia suffruticosa	EOL	TPL	Accepted	Ambiguous
Fritillaria montana	COL	TPL	Accepted	Ambiguous
Fritillaria montana	EOL	TPL	Accepted	Ambiguous
Saussurea pygmaea	COL	EOL	Ambiguous	Accepted
Saussurea pygmaea	EOL	TPL	Accepted	Ambiguous
Ocimum tenuiflorum	COL	TPL	Accepted	Ambiguous
Ocimum tenuiflorum	EOL	TPL	Accepted	Ambiguous
Amaryllis belladonna	COL	TPL	Accepted	Ambiguous
Adenostyles australis	COL	EOL	Synonym	Accepted
Adenostyles australis	EOL	TPL	Accepted	Synonym
Pittosporum parviflorum	EOL	TPL	Accepted	Unresolved
Rhipsalis baccifera subsp. horrida	COL	EOL	Accepted	Synonym
Commiphora dulcis	COL	TPL	Synonym	Accepted
Cotoneaster nepalensis	COL	TPL	Synonym	Ambiguous
Cotoneaster nepalensis	EOL	TPL	Synonym	Ambiguous
Thymus serpyllum	COL	EOL	Accepted	Synonym
Thymus serpyllum	EOL	TPL	Synonym	Accepted
Quillaja saponaria	COL	TPL	Accepted	Ambiguous
Quillaja saponaria	EOL	TPL	Accepted	Ambiguous
Draba glacialis	COL	TPL	Accepted	Ambiguous
Draba glacialis	EOL	TPL	Accepted	Ambiguous
Panicum miliaceum	COL	TPL	Accepted	Ambiguous
[truncated: 7,366 more rows]
