# Supplementary material for: Integrating Biodiversity Data into Botanic Collections
Source: Biodivers Data J. 2016 May 20;(4):e7971. doi: 10.3897/BDJ.4.e7971 (PMC4910503; doi:10.3897/BDJ.4.e7971)
Supplement: Supplementary material 5 — Taxa with IUCN Redlist status [file biodiversity_data_journal-4-e7971-s005.csv]

taxon	redlist taxon	Status	Source
Abies alba	Abies alba	LC	RL
Abies balsamea	Abies balsamea	LC	RL
Abies bornmuelleriana	Abies nordmanniana ssp. nordmanniana	LC	RLsynonym
Abies cephalonica	Abies cephalonica	LC	RL
Abies cilicica	Abies cilicica	NT	RL
Abies concolor var. concolor	Abies concolor	LC	TPLaccepted
Abies firma	Abies firma	LC	RL
Abies holophylla	Abies holophylla	NT	RL
Abies koreana	Abies koreana	EN	RL
Abies nordmanniana	Abies nordmanniana	LC	RL
Abies numidica	Abies numidica	CR	RL
Abies pinsapo	Abies pinsapo	EN	RL
Abies procera	Abies procera	LC	RL
Abies sibirica	Abies sibirica	LC	RL
Abrus schimperi	Abrus schimperi	LC	RL
Acacia montana	Acacia montana	LC	RL
Acacia pendula	Acacia pendula	LC	RL
Acacia visco	Acacia visco	LR/lc	RL
Acanthocalycium spiniflorum	Echinopsis spiniflora	LC	TPLsynonym
Acanthocalycium thionanthum	Echinopsis thionantha	LC	TPLaccepted
Acanthus ilicifolius	Acanthus ilicifolius	LC	RL
Acanthus montanus	Acanthus montanus	LC	RL
Acer oblongum	Acer buergerianum var. formosanum	CR	TPLsynonym
Achillea clypeolata	Achillea thracica	DD	RLsynonym
Achillea crithmifolia	Achillea crithmifolia	LC	RL
Achillea glaberrima	Achillea glaberrima	LC	RL
Achillea ptarmica	Achillea ptarmica	LC	RL
Achillea thracica	Achillea thracica	DD	RL
Aconitum napellus subsp. corsicum	Aconitum corsicum	VU	TPLsynonym
Acorus calamus	Acorus calamus	LC	RL
Acorus gramineus	Acorus gramineus	LC	RL
Acrostichum aureum	Acrostichum aureum	LC	RL
Adiantum capillus-veneris	Adiantum capillus-veneris	LC	RL
Adiantum formosum	Adiantum capillus-veneris	LC	TPLaccepted
Adonidia merrillii	Adonidia merrillii	LR/nt	RL
Aeonium saundersii	Aeonium saundersii	VU	RL
Aesculus hippocastanum	Aesculus hippocastanum	NT	RL
Afrocarpus mannii	Afrocarpus mannii	VU	RL
Afzelia xylocarpa	Afzelia xylocarpa	EN	RL
Agathis borneensis	Agathis borneensis	EN	RL
Agathis robusta	Agathis robusta	LC	RL
Ageratum conyzoides	Ageratum iltisii	VU	TPLsynonym
Aglaia elliptica	Aglaia elliptica	LR/lc	RL
Aglaonema siamense	Aglaonema simplex	LC	TPLaccepted
Alangium javanicum	Alangium javanicum	LR/lc	RL
Albizia carrii	Albizia carrii	VU	RL
Alisma plantago-aquatica	Alisma plantago-aquatica	LC	RL
Alisma plantago-aquatica subsp. plantago-aquatica	Alisma plantago-aquatica	LC	TPLaccepted
Allium chinense	Allium chinense	LC	RL
Allium decipiens	Allium moly	LC	TPLsynonym
Allium ericetorum	Allium ericetorum	DD	RL
Allium globosum	Allium moly	LC	TPLsynonym
Allium heldreichii	Allium heldreichii	DD	RL
Allium insubricum	Allium insubricum	DD	RL
Allium kermesinum	Allium kermesinum	DD	RL
Allium moly	Allium moly	LC	RL
Allium narcissiflorum	Allium narcissiflorum	DD	RL
Allium pallens	Allium stearnii	LC	TPLsynonym
Allium pyrenaicum	Allium pyrenaicum	VU	RL
Allium strictum	Allium suaveolens	LC	TPLsynonym
Allium suaveolens	Allium suaveolens	LC	RL
Allium tuberosum	Allium chinense	LC	TPLsynonym
Allophylus cobbe	Allophylus zimmermannianus	VU	TPLsynonym
Alnus glutinosa	Alnus glutinosa	LC	RL
Aloe eru	Aloe camperi	LC	TPLaccepted
Aloe harlana	Aloe harlana	EN	RL
Aloe jacksonii	Aloe jacksonii	DD	RL
Aloe kilifiensis	Aloe kilifiensis	EN	RL
Aloe lateritia var. lateritia	Aloe lateritia	LC	TPLaccepted
Aloe megalacantha	Aloe megalacantha	LC	RL
Aloe perryi	Aloe perryi	NT	RL
Aloe pirottae	Aloe pirottae	LC	RL
Aloe scobinifolia	Aloe scobinifolia	EN	RL
Aloe steudneri	Aloe steudneri	NT	RL
Aloe suzannae	Aloe suzannae	CR	RL
Aloe viridiflora	Aloe viridiflora	LC	RL
Alstonia angustifolia	Alstonia angustifolia	LR/lc	RL
Ammannia coccinea	Ammannia octandra	LC	TPLsynonym
Amorpha californica	Amorpha californica	LC	RL
Amorphophallus paeoniifolius	Amorphophallus paeoniifolius	LC	RL
Anagyris latifolia	Anagyris latifolia	EN	RL
Andropogon virginicus	Andropogon virginicus	LC	RL
Androsace mathildae	Androsace mathildae	DD	RL
Androsace pyrenaica	Androsace pyrenaica	LC	RL
Anemone decapetala	Anemone jamesonii	EN	TPLsynonym
Anodendron paniculatum	Anodendron rhinosporum	CR	TPLsynonym
Aphanamixis polystachya	Aphanamixis polystachya	LR/lc	RL
Apium graveolens	Apium graveolens	LC	RL
Aquilegia alpina	Aquilegia alpina	LC	RL
Aquilegia bertolonii	Aquilegia bertolonii	LC	RL
Aquilegia pyrenaica	Aquilegia alpina	LC	TPLsynonym
Aralia chinensis	Aralia chinensis	VU	RL
Araucaria angustifolia	Araucaria angustifolia	CR	RL
Araucaria araucana	Araucaria araucana	EN	RL
Araucaria bidwillii	Araucaria bidwillii	LC	RL
Araucaria columnaris	Araucaria columnaris	LC	RL
Araucaria cunninghamii	Araucaria cunninghamii	LC	RL
Araucaria heterophylla	Araucaria heterophylla	VU	RL
Arbutus unedo	Arbutus pavarii	VU	TPLsynonym
Ardisia littoralis	Ardisia squamulosa	VU	TPLsynonym
Areca hutchinsoniana	Areca hutchinsoniana	LR/nt	RL
Ariocarpus agavoides	Ariocarpus agavoides	EN	RL
Ariocarpus fissuratus	Ariocarpus fissuratus	LC	RL
Ariocarpus kotschoubeyanus subsp. albiflorus	Ariocarpus kotschoubeyanus	NT	TPLaccepted
Ariocarpus retusus	Ariocarpus retusus	LC	RL
Ariocarpus trigonus	Ariocarpus trigonus	LC	RL
Arisaema heterophyllum	Arisaema heterophyllum	LC	RL
Aristida purpurea	Aristida purpurea	LC	RL
Armatocereus matucanensis	Armatocereus matucanensis	LC	RL
Armeria berlengensis	Armeria berlengensis	CR	RL
Armeria helodes	Armeria helodes	CR	RL
Armeria pseudarmeria	Armeria pseudarmeria	EN	RL
Armeria purpurea	Armeria helodes	CR	RLsynonym
Armeria rouyana	Armeria rouyana	NT	RL
Armoracia rusticana	Armoracia rusticana	LC	RL
Arnica amplexicaulis	Dendrophorbium amplexicaule	EN	TPLsynonym
Arnica montana	Arnica montana	LC	RL
Artemisia eriantha	Artemisia eriantha	LC	RL
Artemisia genipi	Artemisia genipi	LC	RL
Artemisia rupestris	Artemisia umbelliformis	LC	RLsynonym
Artemisia umbelliformis	Artemisia umbelliformis	LC	RL
Arum purpureospathum	Arum purpureospathum	VU	RL
Arundo donax	Arundo donax	LC	RL
Asparagus aethiopicus	Asparagus aethiopicus	LC	RL
Asparagus officinalis	Asparagus littoralis	DD	TPLsynonym
Asparagus plocamoides	Asparagus plocamoides	VU	RL
Asparagus pseudoscaber	Asparagus pseudoscaber	DD	RL
Asphodelus fistulosus	Asphodelus fistulosus	LC	RL
Aster pyrenaeus	Aster pyrenaeus	EN	RL
Astragalus aquilanus	Astragalus aquilanus	DD	RL
Astragalus arenarius	Astragalus arenarius	LC	RL
Astragalus membranaceus	Astragalus mongholicus	LC	RLsynonym
Astragalus purpureus	Astragalus bourgaeanus	LC	RLsynonym
Astrophytum asterias	Astrophytum asterias	VU	RL
Astrophytum capricorne	Astrophytum capricorne	LC	RL
Astrophytum columnare	Astrophytum myriostigma	LC	TPLaccepted
Astrophytum glabrescens	Astrophytum ornatum	VU	TPLaccepted
Austrocylindropuntia subulata	Austrocylindropuntia subulata	LC	RL
Avena barbata	Avena canariensis	LC	TPLsynonym
Azolla pinnata	Azolla pinnata	LC	RL
Azorina vidalii	Azorina vidalii	EN	RL
Barbarea verna	Barbarea verna	DD	RL
Barbarea vulgaris	Barbarea balcana	LC	TPLsynonym
Bauhinia acuminata	Bauhinia acuminata	LC	RL
Bauhinia forficata	Bauhinia forficata	LC	RL
Bauhinia variegata	Bauhinia variegata	LC	RL
Bellevalia webbiana	Bellevalia webbiana	EN	RL
Bentinckia nicobarica	Bentinckia nicobarica	EN	RL
Berula erecta	Berula erecta	LC	RL
Beta vulgaris	Beta hybrida	DD	TPLsynonym
Betula oycoviensis	Betula oycoviensis	VU	RL
Betula pendula	Betula talassica	EN	TPLsynonym
Betula pendula var. fontqueri	Betula pendula var. fontqueri	EN	RL
Betula raddeana	Betula raddeana	LR/nt	RL
Bismarckia nobilis	Bismarckia nobilis	LC	RL
Blossfeldia liliputana	Blossfeldia liliputana	LC	RL
Boesenbergia pandurata	Boesenbergia rotunda	LC	TPLaccepted
Bolboschoenus maritimus	Bolboschoenus maritimus	LC	RL
Boswellia sacra	Boswellia sacra	LR/nt	RL
Bouteloua gracilis	Chondrosum gracile	LC	TPLaccepted
Brachiaria mutica	Brachiaria mutica	LC	RL
Brachypodium retusum	Brachypodium retusum	LC	RL
Brahea aculeata	Brahea aculeata	VU	RL
Brassica montana	Brassica montana	LC	RL
Brassica oleracea	Brassica oleracea	DD	RL
Bromus bromoideus	Bromus bromoideus	EW	RL
Bromus grossus	Bromus grossus	DD	RL
Bromus rubens	Bromus fasciculatus	LC	RLsynonym
Buxus sempervirens	Buxus colchica	LR/nt	TPLsynonym
Caesalpinia sappan	Caesalpinia sappan	LR/lc	RL
Calamagrostis lapponica	Calamagrostis lapponica	LC	RL
Calathea veitchiana	Calathea veitchiana	NT	RL
Calceolaria fothergillii	Calceolaria fothergillii	LC	RL
Caldesia parnassifolia	Caldesia parnassifolia	LC	RL
Calliandra guildingii	Calliandra decrescens	VU	TPLsynonym
Callitris endlicheri	Callitris endlicheri	LC	RL
Callitris oblonga	Callitris oblonga	VU	RL
Callitris schwarzii	Widdringtonia schwarzii	NT	TPLaccepted
Calocedrus decurrens	Calocedrus decurrens	LC	RL
Calophyllum inophyllum	Calophyllum inophyllum	LR/lc	RL
Camellia reticulata	Camellia reticulata	VU	RL
Campanula lanata	Campanula lanata	DD	RL
Campanula peregrina	Campanula alata	NT	TPLsynonym
Campanula primulifolia	Campanula alata	NT	RLsynonym
Canarium ovatum	Canarium ovatum	VU	RL
Canthium dicoccum	Canthium dicoccum	VU	RL
Carex acuta	Carex hispida	LC	RLsynonym
Carex atrata	Carex distachya	LC	TPLsynonym
Carex binervis	Carex distans	LC	TPLsynonym
Carex canescens	Carex canescens	LC	RL
Carex distachya	Carex distachya	LC	RL
Carex distans	Carex distans	LC	RL
Carex divulsa	Carex canescens	LC	TPLsynonym
Carex divulsa subsp. leersii	Carex canescens	LC	TPLsynonym
Carex hispida	Carex hispida	LC	RL
Carex muricata subsp. lamprocarpa	Carex vulpina	LC	TPLsynonym
Carex remota	Carex remota	LC	RL
Carex vulpina	Carex vulpina	LC	RL
Carica papaya	Carica jamaicensis	VU	TPLsynonym
Carissa edulis	Carissa edulis var. sechellensis	EN	TPLsynonym
Carlina onopordifolia	Carlina onopordifolia	VU	RL
Carludovica palmata	Carludovica palmata	LC	RL
Cassia aphylla	Senna rigida	LC	RLsynonym
Cassia sturtii	Senna artemisioides	LC	RLsynonym
Catha edulis	Catha edulis	LR/lc	RL
Cedrela odorata	Cedrela odorata	VU	RL
Cedrus atlantica	Cedrus atlantica	EN	RL
Cedrus deodara	Cedrus deodara	LC	RL
Celtis caucasica	Celtis caucasica	LC	RL
Centaurea calcitrapa	Centaurea horrida	EN	TPLsynonym
Centaurium erythraea	Centaurium erythraea	LC	RL
Centaurium pulchellum	Centaurium pulchellum	LC	RL
Centella asiatica	Centella asiatica	LC	RL
Cephalotaxus fortunei	Cephalotaxus fortunei	LC	RL
Cephalotaxus harringtonia	Cephalotaxus harringtonii	LC	RLsynonym
Cephalotaxus sinensis	Cephalotaxus sinensis	LC	RL
Ceratophyllum demersum	Ceratophyllum demersum	LC	RL
Ceratophyllum submersum	Ceratophyllum submersum	LC	RL
Ceratopteris thalictroides	Ceratopteris thalictroides	LC	RL
Cercidiphyllum japonicum	Cercidiphyllum japonicum	LR/nt	RL
Cercis canadensis	Cercis canadensis	LR/lc	RL
Cercis chinensis	Cercis chinensis	LC	RL
Cercis griffithii	Cercis griffithii	DD	RL
Cereus hildmannianus	Cereus hildmannianus	LC	RL
Cereus jamacaru	Cereus jamacaru	LC	RL
Cereus repandus	Cereus repandus	LC	RL
Cereus stenogonus	Cereus stenogonus	LC	RL
Chamaecyparis formosensis	Chamaecyparis formosensis	EN	RL
Chamaecyparis lawsoniana	Chamaecyparis lawsoniana	NT	RL
Chamaecyparis nootkatensis	Xanthocyparis nootkatensis	LC	TPLsynonym
Chamaecyparis obtusa	Chamaecyparis obtusa	NT	RL
Chamaecyparis pisifera	Chamaecyparis pisifera	LC	RL
Chamaecyparis thyoides	Chamaecyparis thyoides	LC	RL
Chamaedorea klotzschiana	Chamaedorea klotzschiana	EN	RL
Chamaemelum nobile	Chamaemelum nobile	LC	RL
Chamaespartium sagittale	Genista sagittalis	LC	TPLaccepted
Chamorchis alpina	Chamorchis alpina	LC	RL
Chionochloa rigida	Chionochloa rigida	LC	RL
Christia vespertilionis	Christia vespertilionis	LC	RL
Cicerbita plumieri	Lactuca plumieri	DD	TPLaccepted
Cinnamomum burmanni	Cinnamomum macrostemon	VU	TPLsynonym
Cinnamomum japonicum	Cinnamomum japonicum	LR/nt	RL
Cirsium brachycephalum	Cirsium brachycephalum	LC	RL
Cistus chinamadensis	Cistus chinamadensis	EN	RL
Cladium mariscus	Cladium mariscus	LC	RL
Cleistocactus baumannii	Cleistocactus baumannii	LC	RL
Cleistocactus morawetzianus	Cleistocactus morawetzianus	DD	RL
Cleistocactus parviflorus	Cleistocactus parviflorus	LC	RL
Cleistocactus smaragdiflorus	Cleistocactus smaragdiflorus	LC	RL
Cleistocactus strausii	Cleistocactus strausii	LC	RL
Cleistocactus winteri	Cleistocactus winteri	EN	RL
Clinostigma harlandii	Clinostigma harlandii	LR/nt	RL
Cnidoscolus chayamansa	Cnidoscolus fragrans	EX	TPLsynonym
Coccoloba rugosa	Coccoloba rugosa	EN	RL
Commelina benghalensis	Commelina benghalensis	LC	RL
Commelina dianthifolia	Commelina caroliniana	LC	TPLsynonym
Commelina erecta	Commelina erecta	LC	RL
Copernicia baileyana	Copernicia baileyana	LR/lc	RL
Copiapoa coquimbana	Copiapoa coquimbana	LC	RL
Copiapoa echinoides	Copiapoa echinoides	NT	RL
Copiapoa grandiflora	Copiapoa grandiflora	EN	RL
Copiapoa humilis	Copiapoa humilis	NT	RL
Copiapoa marginata	Copiapoa marginata	NT	RL
Copiapoa mollicula	Copiapoa montana	LC	TPLaccepted
Cordia subcordata	Cordia subcordata	LR/lc	RL
Corokia macrocarpa	Corokia macrocarpa	LR/nt	RL
Coronilla valentina	Coronilla valentina	LC	RL
Corylopsis pauciflora	Corylopsis pauciflora	DD	RL
Corylus avellana	Corylus avellana	LC	RL
Corylus chinensis	Corylus chinensis	EN	RL
Corynopuntia bulbispina	Corynopuntia bulbispina	EN	RL
Corypha umbraculifera	Corypha umbraculifera	DD	RL
Coryphantha maiz-tablasensis	Coryphantha maiz-tablasensis	EN	RL
Coryphantha odorata	Cumarinia odorata	LC	TPLsynonym
Coryphantha ottonis	Coryphantha ottonis	LC	RL
Coryphantha pallida	Coryphantha pallida	LC	RL
Coryphantha palmeri	Coryphantha delicata	LC	TPLaccepted
Coryphantha pectinata	Coryphantha echinus	LC	TPLaccepted
Coryphantha radians	Coryphantha cornifera	LC	TPLaccepted
Coryphantha retusa	Coryphantha retusa	DD	RL
Cotoneaster granatensis	Cotoneaster granatensis	LR/cd	RL
Cotoneaster karatavicus	Cotoneaster karatavicus	DD	RL
Cotoneaster morulus	Cotoneaster morulus	LR/lc	RL
Cotoneaster transcaucasicus	Cotoneaster transcaucasicus	LR/lc	RL
Couroupita guianensis	Couroupita guianensis	LR/lc	RL
Crambe arborea	Crambe arborea	VU	RL
Crambe strigosa	Crambe strigosa	LC	RL
Crassula tillaea	Crassula tillaea	LC	RL
Crataegus azarolus	Crataegus azarolus	LR/lc	RL
Crataegus laevigata	Crataegus laevigata	LC	RL
Crataegus nigra	Crataegus nigra	VU	RL
Crataegus pontica	Crataegus pontica	LC	RL
Cratoxylum formosum	Cratoxylum formosum	LR/lc	RL
Crotalaria nitens	Crotalaria nitens	LC	RL
Cryptomeria japonica	Cryptomeria japonica	NT	RL
Cunninghamia lanceolata	Cunninghamia lanceolata	LC	RL
Cupressus funebris	Cupressus funebris	DD	RL
Cupressus lusitanica	Cupressus lusitanica	LC	RL
Cupressus macnabiana	Cupressus macnabiana	LC	RL
Cupressus macrocarpa	Cupressus macrocarpa	VU	RL
Cupressus sempervirens	Cupressus sempervirens	LC	RL
Cupressus sempervirens var. dupreziana	Cupressus dupreziana	EN	TPLaccepted
Cupressus torulosa	Cupressus torulosa	LC	RL
Curcuma ornata	Curcuma ornata	DD	RL
Curcuma roscoeana	Curcuma roscoeana	LC	RL
Cussonia gamtoosensis	Cussonia gamtoosensis	VU	RL
Cyanotis cristata	Cyanotis cristata	LC	RL
Cycas circinalis	Cycas circinalis	EN	RL
Cycas revoluta	Cycas revoluta	LC	RL
Cycas rumphii	Cycas rumphii	NT	RL
Cyperus alternifolius	Cyperus alternifolius	LC	RL
Cyperus diffusus	Cyperus diffusus	LC	RL
Cyperus esculentus	Cyperus esculentus	LC	RL
Cyperus fuscus	Cyperus fuscus	LC	RL
Cyperus involucratus	Cyperus imbricatus	LC	RLsynonym
Cyperus longus	Cyperus longus	LC	RL
Cyperus michelianus	Cyperus michelianus	LC	RL
Cyperus papyrus	Cyperus papyrus	LC	RL
Cyperus polystachyus	Pycreus flavescens	LC	TPLaccepted
Cyperus subumbellatus	Cyperus cyperoides	LC	TPLaccepted
Cyperus textilis	Cyperus textilis	LC	RL
Cyperus thunbergii	Cyperus alopecuroides	LC	TPLsynonym
Cyphostemma bainesii	Cyphostemma bainesii	LC	RL
Cyphostemma juttae	Cyphostemma juttae	LC	RL
Cyrtostachys elegans	Cyrtostachys elegans	NT	RL
Cytisus aeolicus	Cytisus aeolicus	CR	RL
Cytisus striatus	Cytisus striatus	LC	RL
Dalbergia latifolia	Dalbergia latifolia	VU	RL
Dalbergia odorifera	Dalbergia odorifera	VU	RL
Darlingtonia californica	Darlingtonia californica	LR/lc	RL
Datura rosei	Brugmansia aurea	VU	TPLsynonym
Davidia involucrata	Davidia involucrata var. involucrata	LR/cd	TPLsynonym
Delonix regia	Delonix regia	VU	RL
Dendriopoterium pulidoi	Dendriopoterium pulidoi	VU	RL
Desmodium intortum	Desmodium intortum	LC	RL
Dianthus campestris	Dianthus hypanicus	VU	TPLsynonym
Dianthus hungaricus	Dianthus serotinus	DD	RLsynonym
Dianthus hypanicus	Dianthus hypanicus	VU	RL
Dianthus moravicus	Dianthus moravicus	DD	RL
Dianthus nitidus	Dianthus nitidus	NT	RL
Dianthus pontederae	Dianthus diutinus	EN	TPLsynonym
Dianthus serotinus	Dianthus serotinus	DD	RL
Dichrostachys cinerea	Dichrostachys cinerea	LC	RL
Didymochlaena truncatula	Didymochlaena truncatula	LC	RL
Dillenia megalantha	Dillenia megalantha	VU	RL
Dillenia philippinensis	Dillenia philippinensis	VU	RL
Dimocarpus longan	Dimocarpus longan	LR/nt	RL
Dionaea muscipula	Dionaea muscipula	VU	RL
Dioon merolae	Dioon merolae	VU	RL
Diospyros celebica	Diospyros celebica	VU	RL
Diospyros lotus	Diospyros lotus	LC	RL
Diplazium esculentum	Diplazium esculentum	LC	RL
Dipteronia sinensis	Dipteronia sinensis	LR/nt	RL
Discocactus horstii	Discocactus horstii	VU	RL
Disocactus biformis	Disocactus biformis	EN	RL
Disocactus flagelliformis	Disocactus flagelliformis	NT	RL
Dorstenia hildebrandtii	Dorstenia hildebrandtii	LC	RL
Dorycnium spectabile	Dorycnium spectabile	EN	RL
Draba aizoides	Draba stylosa	VU	TPLsynonym
Dracaena draco	Dracaena draco	VU	RL
Dracunculus vulgaris	Dracunculus vulgaris	LC	RL
Drosera indica	Drosera indica	LC	RL
Drosera spatulata	Drosera burmanni	LC	TPLsynonym
Dryobalanops lanceolata	Dryobalanops lanceolata	EN	RL
Dyera costulata	Dyera costulata	LR/lc	RL
Dypsis decaryi	Dypsis decaryi	VU	RL
Dypsis lutescens	Dypsis lutescens	NT	RL
Dypsis pinnatifrons	Dypsis pinnatifrons	LC	RL
Dysoxylum alliaceum	Dysoxylum alliaceum	LR/lc	RL
Ebenopsis ebano	Ebenopsis ebano	LC	RL
Echinocactus grusonii	Echinocactus grusonii	EN	RL
Echinocereus cinerascens	Echinocereus cinerascens	LC	RL
Echinocereus coccineus	Echinocereus coccineus	LC	RL
Echinocereus ctenoides	Echinocereus dasyacanthus	LC	TPLaccepted
Echinocereus engelmannii	Echinocereus engelmannii	LC	RL
Echinocereus fobeanus subsp. metornii	Echinocereus metornii	DD	TPLsynonym
Echinocereus pectinatus	Echinocereus pectinatus	LC	RL
Echinocereus reichenbachii	Echinocereus reichenbachii	LC	RL
Echinocereus rigidissimus	Echinocereus rigidissimus	LC	RL
Echinocereus santaritensis subsp. bacanorensis	Echinocereus scheeri	LC	TPLaccepted
Echinocereus subinermis	Echinocereus subinermis	DD	RL
Echinocereus triglochidiatus	Echinocereus triglochidiatus	LC	RL
Echinocereus viridiflorus	Echinocereus viridiflorus	LC	RL
Echinochloa frumentacea	Echinochloa frumentacea	LC	RL
Echinopsis backebergii	Echinopsis backebergii	VU	RL
Echinopsis calochlora	Echinopsis calochlora	LC	RL
Echinopsis chamaecereus	Echinopsis chamaecereus	DD	RL
Echinopsis hertrichiana	Echinopsis hertrichiana	EN	RL
Echinopsis leucantha	Echinopsis leucantha	LC	RL
Echinopsis mamillosa	Echinopsis mamillosa	LC	RL
Echinopsis mirabilis	Echinopsis mirabilis	LC	RL
Echinopsis obrepanda	Echinopsis obrepanda	LC	RL
Echinopsis oxygona	Echinopsis oxygona	LC	RL
Echium candicans	Echium candicans	DD	RL
Echium flavum	Echium valentinum	EN	TPLsynonym
Echium gentianoides	Echium gentianoides	VU	RL
Echium handiense	Echium handiense	CR	RL
Echium pininana	Echium pininana	EN	RL
Eleocharis carniolica	Eleocharis carniolica	LC	RL
Eleocharis palustris	Eleocharis palustris	LC	RL
Eleocharis uniglumis	Eleocharis uniglumis	LC	RL
Eleusine indica	Eleusine indica	LC	RL
Elymus alopex	Elymus alopex	LC	RL
Encephalartos lehmannii	Encephalartos lehmannii	NT	RL
Encephalartos villosus	Encephalartos villosus	LC	RL
Endocomia virella	Endocomia virella	VU	RL
Ephedra altissima	Ephedra altissima	LC	RL
Ephedra americana subsp. andina	Ephedra chilensis	LC	RLsynonym
Ephedra distachya	Ephedra distachya	LC	RL
Ephedra fragilis	Ephedra fragilis	LC	RL
Ephedra likiangensis	Ephedra likiangensis	LC	RL
Ephedra minuta	Ephedra minuta	LC	RL
Ephedra przewalskii	Ephedra przewalskii	LC	RL
Ephedra tweediana	Ephedra tweediana	LC	RL
Epilobium hirsutum	Epilobium hirsutum	LC	RL
Epilobium parviflorum	Epilobium numidicum	CR	TPLsynonym
Epipactis purpurata	Epipactis purpurata	LC	RL
Epiphyllum anguliger	Epiphyllum anguliger	LC	RL
Epiphyllum oxypetalum	Epiphyllum oxypetalum	LC	RL
Epiphyllum stenopetalum	Epiphyllum hookeri	LC	TPLaccepted
Epithelantha micromeris	Epithelantha micromeris	LC	RL
Equisetum ramosissimum	Equisetum giganteum	LC	RLsynonym
Eragrostis japonica	Eragrostis japonica	LC	RL
Erianthus ravennae	Saccharum ravennae	LC	TPLaccepted
Erica cinerea	Erica cinerea	LC	RL
Erigeron glabratus	Erigeron frigidus	EN	TPLsynonym
Eriosyce esmeraldana	Eriosyce esmeraldana	EN	RL
Eriosyce occulta	Eriosyce occulta	EN	RL
Eriosyce paucicostata	Eriosyce paucicostata	LC	RL
Eryngium alpinum	Eryngium alpinum	NT	RL
Eryngium bourgatii	Eryngium alpinum	NT	TPLsynonym
Eryngium variifolium	Eryngium variifolium	VU	RL
Erysimum hungaricum	Erysimum pieninicum	VU	TPLsynonym
Escobaria emskoetteriana	Escobaria emskoetteriana	LC	RL
Escobaria hesteri	Escobaria hesteri	LC	RL
Escobaria missouriensis	Escobaria missouriensis	LC	RL
Escobaria tuberculosa	Escobaria tuberculosa	LC	RL
Escobaria zilziana	Escobaria zilziana	DD	RL
Espostoa lanata	Espostoa lanata	LC	RL
Eucommia ulmoides	Eucommia ulmoides	LR/nt	RL
Eucrosia aurantiaca	Eucrosia aurantiaca	EN	RL
Eugenia uniflora	Eugenia indica	EN	TPLsynonym
Eulalia amaura	Polytrias indica	LC	TPLaccepted
Euonymus grandiflorus	Euonymus grandiflorus	LR/lc	RL
Euonymus javanicus	Euonymus javanicus	LR/lc	RL
Euonymus verrucosus	Euonymus verrucosus	LC	RL
Euphorbia alcicornis	Euphorbia alcicornis	CR	RL
Euphorbia lambii	Euphorbia bourgeana	VU	RLsynonym
Euphorbia leuconeura	Euphorbia leuconeura	VU	RL
Euphorbia margalidiana	Euphorbia margalidiana	CR	RL
Euphorbia milii	Euphorbia milii	DD	RL
Euphorbia paniculata	Euphorbia paniculata	LC	RL
Euphorbia ramipressa	Euphorbia alcicornis	CR	TPLsynonym
Euphorbia tirucalli	Euphorbia tirucalli	LC	RL
Euryale ferox	Euryale ferox	LC	RL
Eusideroxylon zwageri	Eusideroxylon zwageri	VU	RL
Exaculum pusillum	Exaculum pusillum	NT	RL
Excoecaria agallocha	Excoecaria agallocha	LC	RL
Ferocactus glaucescens	Ferocactus glaucescens	LC	RL
Ferocactus histrix	Ferocactus histrix	NT	RL
Ferocactus peninsulae	Ferocactus peninsulae	LC	RL
Ferocactus robustus	Ferocactus robustus	VU	RL
Ferocactus wislizeni	Ferocactus wislizeni	VU	RL
Ferula sadleriana	Ferula sadleriana	EN	RL
Festuca arundinacea	Poa kunthii	DD	TPLsynonym
Ficus carica	Ficus carica	LC	RL
Frailea buenekeri	Frailea buenekeri	EN	RL
Frailea castanea	Frailea castanea	LC	RL
Frailea cataphracta	Frailea cataphracta	NT	RL
Frailea chiquitana	Frailea chiquitana	DD	RL
Frailea colombiana	Frailea pumila	LC	TPLaccepted
Frailea gracillima	Frailea gracillima	VU	RL
Frailea phaeodisca	Frailea phaeodisca	VU	RL
Frailea pygmaea	Frailea pygmaea	LC	RL
Frailea schilinzkyana	Frailea schilinzkyana	VU	RL
Fraxinus sogdiana	Fraxinus sogdiana	NT	RL
Fritillaria graeca subsp. graeca	Fritillaria graeca	DD	TPLaccepted
Fritillaria lusitanica	Fritillaria falcata	EN	TPLsynonym
Fritillaria meleagris	Fritillaria montana	DD	TPLsynonym
Fritillaria montana	Fritillaria montana	DD	RL
Galanthus nivalis	Galanthus nivalis	NT	RL
Galeopsis ladanum	Galeopsis segetum	DD	TPLsynonym
Galeopsis segetum	Galeopsis segetum	DD	RL
Galium mollugo	Galium flaccidum	DD	TPLsynonym
Garcinia celebica	Garcinia kingii	EN	TPLsynonym
Gaussia attenuata	Gaussia attenuata	VU	RL
Genista anglica	Genista ancistrocarpa	EN	TPLsynonym
Genista tenera	Genista tenera	LC	RL
Gentiana acaulis	Gentiana acaulis	LC	RL
Gentiana ligustica	Gentiana ligustica	LC	RL
Gentiana punctata	Gentiana punctata	LC	RL
Gentiana purpurea	Gentiana purpurea	LC	RL
Gentianella amarella	Gentiana purpurea	LC	TPLsynonym
Geoffroea decorticans	Geoffroea decorticans	LC	RL
Geranium maderense	Geranium maderense	CR	RL
Geum bulgaricum	Geum bulgaricum	LC	RL
Ginkgo biloba	Ginkgo biloba	EN	RL
Gladiolus italicus	Gladiolus italicus	LC	RL
Gladiolus palustris	Gladiolus palustris	DD	RL
Gleditsia assamica	Gleditsia assamica	VU	RL
Globba winitii	Globba winitii	LC	RL
Globularia sarcophylla	Globularia sarcophylla	VU	RL
Gloriosa superba	Gloriosa superba	LC	RL
Gnetum gnemon	Gnetum gnemon	LC	RL
Guaiacum officinale	Guaiacum officinale	EN	RL
Guzmania fusispica	Guzmania fusispica	VU	RL
Guzmania osyana	Guzmania osyana	EN	RL
Gymnadenia odoratissima	Gymnadenia odoratissima	LC	RL
Gymnocalycium andreae	Gymnocalycium andreae	LC	RL
Gymnocalycium baldianum	Gymnocalycium baldianum	LC	RL
Gymnocalycium bodenbenderianum	Gymnocalycium bodenbenderianum	LC	RL
Gymnocalycium bruchii	Gymnocalycium bruchii	LC	RL
Gymnocalycium calochlorum	Gymnocalycium calochlorum	LC	RL
Gymnocalycium castellanosii	Gymnocalycium castellanosii	LC	RL
Gymnocalycium denudatum	Gymnocalycium denudatum	EN	RL
Gymnocalycium erinaceum	Gymnocalycium erinaceum	LC	RL
Gymnocalycium eurypleurum	Gymnocalycium eurypleurum	LC	RL
Gymnocalycium gibbosum	Gymnocalycium gibbosum	LC	RL
Gymnocalycium hybopleurum	Gymnocalycium nigriareolatum	LC	TPLsynonym
Gymnocalycium marsoneri	Gymnocalycium marsoneri	LC	RL
Gymnocalycium mesopotamicum	Gymnocalycium mesopotamicum	LC	RL
Gymnocalycium mihanovichii	Gymnocalycium mihanovichii	LC	RL
Gymnocalycium monvillei	Gymnocalycium monvillei	LC	RL
Gymnocalycium mostii	Gymnocalycium mostii	LC	RL
Gymnocalycium mucidum	Gymnocalycium glaucum	LC	TPLsynonym
Gymnocalycium neuhuberi	Gymnocalycium neuhuberi	CR	RL
Gymnocalycium ochoterenae	Gymnocalycium ochoterenae	LC	RL
Gymnocalycium parvulum	Gymnocalycium berchtii	LC	TPLsynonym
Gymnocalycium pflanzii	Gymnocalycium pflanzii	LC	RL
Gymnocalycium ritterianum	Gymnocalycium ritterianum	LC	RL
Gymnocalycium saglionis	Gymnocalycium saglionis	LC	RL
Gymnocalycium schickendantzii	Gymnocalycium schickendantzii	LC	RL
Gymnocalycium stellatum	Gymnocalycium stellatum	LC	RL
Gymnocalycium stenopleurum	Gymnocalycium stenopleurum	LC	RL
Haberlea rhodopensis	Haberlea rhodopensis	LC	RL
Hamatocactus setispinus	Thelocactus setispinus	LC	TPLaccepted
Harrisia pomanensis	Harrisia pomanensis	LC	RL
Harrisia regelii	Harrisia regelii	LC	RL
Harrisia tortuosa	Harrisia tortuosa	LC	RL
Hatiora salicornioides	Hatiora salicornioides	LC	RL
Heberdenia excelsa	Heberdenia excelsa	VU	RL
Helianthemum bystropogophyllum	Helianthemum bystropogophyllum	CR	RL
Heliconia obscura	Heliconia obscura	VU	RL
Helosciadium nodiflorum	Apium nodiflorum	LC	TPLaccepted
Heptacodium miconioides	Heptacodium miconioides	VU	RL
Hippocrepis comosa	Hippocrepis comosa	LC	RL
Hippocrepis valentina	Hippocrepis valentina	LC	RL
Hirschfeldia incana	Brassica incana	DD	TPLsynonym
Hopea celebica	Hopea celebica	EN	RL
Horsfieldia iryaghedhi	Horsfieldia iryaghedhi	CR	RL
Howea belmoreana	Howea belmoreana	VU	RL
Howea forsteriana	Howea forsteriana	VU	RL
Hylocereus undatus	Hylocereus undatus	DD	RL
Hymenaea courbaril	Hymenaea courbaril	LC	RL
Hyophorbe lagenicaulis	Hyophorbe lagenicaulis	CR	RL
Hypericum elodes	Hypericum elodes	LC	RL
Hypericum tetrapterum var. corsicum	Hypericum corsicum	LC	TPLsynonym
Hypochaeris oligocephala	Hypochaeris oligocephala	CR	RL
Ilex paraguariensis	Ilex paraguariensis	LR/nt	RL
Intsia bijuga	Intsia bijuga	VU	RL
Ipomoea aquatica	Ipomoea aquatica	LC	RL
Iris lusitanica	Iris lusitanica	DD	RL
Iris marsica	Iris marsica	DD	RL
Irvingia malayana	Irvingia malayana	LR/lc	RL
Isatis apennina	Isatis allionii	DD	TPLaccepted
Isatis tinctoria	Isatis vermia	DD	TPLsynonym
Isolepis cernua	Isolepis prolifera	LC	TPLsynonym
Isolepis setacea	Isolepis setacea	LC	RL
Isoplexis chalcantha	Isoplexis chalcantha	CR	RL
Isoplexis isabelliana	Isoplexis isabelliana	EN	RL
Jacaranda mimosifolia	Jacaranda mimosifolia	VU	RL
Jasione montana	Jasione lusitanica	EN	TPLsynonym
Joannesia princeps	Joannesia princeps	VU	RL
Jubaea chilensis	Jubaea chilensis	VU	RL
Juglans californica	Juglans californica	VU	RL
Juglans regia	Juglans regia	NT	RL
Juncus articulatus subsp. articulatus	Juncus articulatus	LC	TPLaccepted
Juncus bufonius	Juncus bufonius	LC	RL
Juncus effusus	Juncus effusus	LC	RL
Juncus inflexus	Juncus inflexus	LC	RL
Juniperus cedrus subsp. maderensis	Juniperus cedrus	EN	TPLaccepted
Juniperus chinensis	Juniperus chinensis	LC	RL
Juniperus chinensis var. sargentii	Juniperus chinensis var. sargentii	LC	RL
Juniperus communis	Juniperus communis	LC	RL
Juniperus conferta	Juniperus rigida ssp. conferta	LC	RLsynonym
Juniperus deppeana subsp. pachyphlaea	Juniperus deppeana	LC	TPLaccepted
Juniperus excelsa	Juniperus excelsa	LC	RL
Juniperus horizontalis	Juniperus horizontalis	LC	RL
Juniperus monosperma	Juniperus monosperma	LC	RL
Juniperus occidentalis	Juniperus occidentalis	LC	RL
Juniperus oxycedrus	Juniperus oxycedrus	LC	RL
Juniperus oxycedrus subsp. macrocarpa	Juniperus oxycedrus ssp. macrocarpa	LC	RL
Juniperus oxycedrus subsp. oxycedrus	Juniperus oxycedrus ssp. oxycedrus	LC	RL
Juniperus phoenicea	Juniperus phoenicea	LC	RL
Juniperus sabina	Juniperus sabina	LC	RL
Juniperus scopulorum	Juniperus scopulorum	LC	RL
Juniperus thurifera	Juniperus thurifera	LC	RL
Juniperus virginiana	Juniperus virginiana	LC	RL
Juniperus wallichiana	Juniperus indica	LC	TPLaccepted
Kalappia celebica	Kalappia celebica	VU	RL
Keteleeria fortunei	Keteleeria fortunei	NT	RL
Khaya ivorensis	Khaya ivorensis	VU	RL
Khaya senegalensis	Khaya senegalensis	VU	RL
Kibara coriacea	Kibara coriacea	LR/lc	RL
Koompassia excelsa	Koompassia excelsa	LR/cd	RL
Kopsia arborea	Kopsia scortechinii	DD	TPLsynonym
Kyllinga brevifolia	Kyllinga brevifolia	LC	RL
Kyllinga monocephala	Kyllinga nemoralis	LC	RLsynonym
Lactuca perennis	Lactuca perennis	DD	RL
Lafoensia vandelliana	Lafoensia replicata	VU	TPLsynonym
Larix decidua	Larix decidua	LC	RL
Larix gmelinii	Larix gmelinii	LC	RL
Larix gmelinii var. principis-rupprechtii	Larix gmelinii var. principis-rupprechtii	LC	RL
Larix kaempferi	Larix kaempferi	LC	RL
Larix laricina	Larix laricina	LC	RL
Larix occidentalis	Larix occidentalis	LC	RL
Lasia spinosa	Lasia spinosa	LC	RL
Latania loddigesii	Latania loddigesii	EN	RL
Latania lontaroides	Latania lontaroides	EN	RL
Lathyrus grandiflorus	Lathyrus grandiflorus	LC	RL
Lathyrus heterophyllus	Lathyrus heterophyllus	LC	RL
Lathyrus hirsutus	Lathyrus hirsutus	LC	RL
Lathyrus latifolius	Lathyrus rotundifolius	LC	RLsynonym
Lathyrus odoratus	Lathyrus odoratus	NT	RL
Lathyrus rotundifolius	Lathyrus rotundifolius	LC	RL
Lathyrus sphaericus	Lathyrus sphaericus	LC	RL
Laurocerasus javanica	Prunus javanica	LR/lc	TPLaccepted
Laurus azorica	Laurus azorica	LR/nt	RL
Lavandula angustifolia	Lavandula angustifolia	LC	RL
Lavandula latifolia	Lavandula latifolia	LC	RL
Ledum palustre	Ledum palustre	LC	RL
Lemna minor	Lemna minor	LC	RL
Lemna trisulca	Lemna trisulca	LC	RL
Leontopodium nivale subsp. alpinum	Leontopodium alpinum	LC	TPLsynonym
Lepidium cardamines	Lepidium cardamines	LC	RL
Lepidium cartilagineum	Lepidium syvaschicum	DD	TPLsynonym
Lepidium heterophyllum	Lepidium heterophyllum	LC	RL
Lepismium dissimile	Rhipsalis dissimilis	EN	TPLaccepted
Lepismium puniceo-discus	Rhipsalis puniceodiscus	LC	TPLaccepted
Lespedeza bicolor	Lespedeza thunbergii	DD	RLsynonym
Lespedeza thunbergii	Lespedeza thunbergii	DD	RL
Leuchtenbergia principis	Leuchtenbergia principis	LC	RL
Leuzea cynaroides	Stemmacantha cynaroides	EN	TPLsynonym
Ligustrum sinense	Ligustrum microcarpum	EN	TPLsynonym
Lilium carniolicum subsp. jankae	Lilium jankae	DD	TPLaccepted
Lilium pomponium	Lilium pomponium	LC	RL
Limonium sventenii	Limonium sventenii	CR	RL
Lindernia procumbens	Lindernia procumbens	LC	RL
Linum dolomiticum	Linum dolomiticum	DD	RL
Linum maritimum	Linum muelleri	VU	TPLsynonym
Liquidambar styraciflua	Liquidambar styraciflua	LR/lc	RL
Liriodendron chinense	Liriodendron chinense	LR/nt	RL
Litchi chinensis	Litchi chinensis var. euspontanea	VU	TPLsynonym
Lithops fulviceps var. fulviceps	Lithops fulviceps	LC	TPLaccepted
Livistona rotundifolia	Livistona robinsoniana	VU	TPLsynonym
Livistona saribus	Livistona tonkinensis	DD	TPLsynonym
Lophophora fricii	Lophophora fricii	DD	RL
Lophophora williamsii	Lophophora williamsii	VU	RL
Lotus tetragonolobus	Lotus tetragonolobus	LC	RL
Ludwigia octovalvis	Ludwigia octovalvis	LC	RL
Ludwigia palustris	Ludwigia palustris	LC	RL
Lupinus elegans	Lupinus barkeri	LC	RLsynonym
Lupinus nootkatensis	Lupinus nootkatensis	LC	RL
Lupinus perennis	Lupinus nootkatensis	LC	RLsynonym
Luronium natans	Luronium natans	LC	RL
Luzula forsteri	Luzula johnstonii	DD	RLsynonym
Lysimachia minoricensis	Lysimachia minoricensis	EW	RL
Lythrum hyssopifolia	Lythrum hyssopifolia	LC	RL
Maackia amurensis	Maackia amurensis	LC	RL
Magnolia cylindrica	Magnolia cylindrica	VU	RL
Magnolia officinalis	Magnolia officinalis	LR/nt	RL
Magnolia wilsonii	Magnolia wilsonii	EN	RL
Mahonia lomariifolia	Mahonia oiwakensis	VU	TPLaccepted
Maihuenia patagonica	Maihuenia patagonica	LC	RL
Maihuenia poeppigii	Maihuenia poeppigii	LC	RL
Maihueniopsis darwinii	Maihueniopsis darwinii	LC	RL
Malus hupehensis	Malus hupehensis	DD	RL
Malus niedzwetzkyana	Malus niedzwetzkyana	EN	RL
Malus pumila	Malus dasyphylla	DD	RLsynonym
Malus sieversii	Malus sieversii	VU	RL
Malus sylvestris	Malus sylvestris	DD	RL
Malus toringo	Malus hupehensis	DD	TPLsynonym
Mammillaria albilanata	Mammillaria albilanata	LC	RL
Mammillaria backebergiana	Mammillaria backebergiana	DD	RL
Mammillaria blossfeldiana	Mammillaria blossfeldiana	NT	RL
Mammillaria bocasana	Mammillaria bocasana	LC	RL
Mammillaria candida	Mammilloydia candida	LC	RLsynonym
Mammillaria columbiana	Mammillaria columbiana	LC	RL
Mammillaria crinita	Mammillaria crinita	LC	RL
Mammillaria crucigera	Mammillaria crucigera	EN	RL
Mammillaria dioica	Mammillaria dioica	LC	RL
Mammillaria discolor	Mammillaria discolor	LC	RL
Mammillaria elongata	Mammillaria elongata	LC	RL
Mammillaria evermanniana	Mammillaria evermanniana	LC	RL
Mammillaria formosa	Mammillaria formosa	LC	RL
Mammillaria geminispina	Mammillaria geminispina	LC	RL
Mammillaria grusonii	Mammillaria grusonii	LC	RL
Mammillaria haageana	Mammillaria haageana	LC	RL
Mammillaria hahniana	Mammillaria hahniana	NT	RL
Mammillaria heyderi	Mammillaria heyderi	LC	RL
Mammillaria huitzilopochtli	Mammillaria huitzilopochtli	LC	RL
Mammillaria insularis	Mammillaria insularis	LC	RL
Mammillaria jaliscana	Mammillaria jaliscana	VU	RL
Mammillaria johnstonii	Mammillaria johnstonii	EN	RL
Mammillaria karwinskiana	Mammillaria karwinskiana	LC	RL
Mammillaria klissingiana	Mammillaria klissingiana	LC	RL
Mammillaria knippeliana	Mammillaria knippeliana	DD	RL
Mammillaria magnimamma	Mammillaria magnimamma	LC	RL
Mammillaria mammillaris	Mammillaria mammillaris	LC	RL
Mammillaria marksiana	Mammillaria marksiana	LC	RL
Mammillaria matudae	Mammillaria matudae	DD	RL
Mammillaria melanocentra	Mammillaria melanocentra	LC	RL
Mammillaria meyranii	Mammillaria meyranii	DD	RL
Mammillaria microcarpa	Mammillaria grahamii	LC	TPLaccepted
Mammillaria moelleriana	Mammillaria moelleriana	LC	RL
Mammillaria muehlenpfordtii	Mammillaria muehlenpfordtii	LC	RL
Mammillaria multidigitata	Mammillaria multidigitata	VU	RL
Mammillaria multiseta	Mammillaria polyedra	LC	TPLaccepted
Mammillaria mystax	Mammillaria mystax	LC	RL
Mammillaria nana	Mammillaria nana	LC	RL
Mammillaria nivosa	Mammillaria nivosa	LC	RL
Mammillaria nunezii	Mammillaria nunezii	LC	RL
Mammillaria occidentalis	Mammillaria mazatlanensis	LC	TPLaccepted
Mammillaria orcuttii	Mammillaria orcuttii	LC	RL
Mammillaria parkinsonii	Mammillaria parkinsonii	EN	RL
Mammillaria perbella	Mammillaria perbella	VU	RL
Mammillaria petrophila	Mammillaria petrophila	VU	RL
Mammillaria polythele	Mammillaria polythele	LC	RL
Mammillaria pringlei	Mammillaria pringlei	VU	RL
Mammillaria prolifera	Mammillaria prolifera	LC	RL
Mammillaria rhodantha	Mammillaria rhodantha	LC	RL
Mammillaria schiedeana	Mammillaria schiedeana	VU	RL
Mammillaria schumannii	Mammillaria schumannii	EN	RL
Mammillaria seitziana	Mammillaria compressa	LC	TPLaccepted
Mammillaria sempervivi	Mammillaria sempervivi	LC	RL
Mammillaria spinosissima	Mammillaria spinosissima	DD	RL
Mammillaria supertexta	Mammillaria supertexta	EN	RL
Mammillaria surculosa	Mammillaria surculosa	EN	RL
Mammillaria uncinata	Mammillaria uncinata	LC	RL
Mangifera casturi	Mangifera casturi	EW	RL
Mangifera odorata	Mangifera odorata	DD	RL
Mangifera similis	Mangifera similis	VU	RL
Manilkara kanosiensis	Manilkara kanosiensis	EN	RL
Maranthes corymbosa	Maranthes corymbosa	LR/lc	RL
Marojejya darianii	Marojejya darianii	EN	RL
Marojejya insignis	Marojejya insignis	LC	RL
Marsilea quadrifolia	Marsilea quadrifolia	LC	RL
Matucana madisoniorum	Matucana madisoniorum	CR	RL
Matucana paucicostata	Matucana paucicostata	VU	RL
Matucana weberbaueri	Matucana weberbaueri	EN	RL
Maytenus dhofarensis	Maytenus dhofarensis	LR/nt	RL
Medicago arborea	Medicago citrina	CR	TPLsynonym
Medicago falcata	Medicago kotovii	VU	TPLsynonym
Medicago prostrata	Medicago prostrata	LC	RL
Mediolobivia pygmaea	Rebutia pygmaea	LC	TPLsynonym
Melilotus italicus	Melilotus italicus	LC	RL
Melocactus bahiensis	Melocactus bahiensis	LC	RL
Melocactus matanzanus	Melocactus matanzanus	EN	RL
Melocactus maxonii	Melocactus curvispinus	LC	TPLaccepted
Melocactus neryi	Melocactus neryi	LC	RL
Melocactus oreas	Melocactus oreas	LC	RL
Melocactus salvadorensis	Melocactus salvadorensis	VU	RL
Melocactus schatzlii	Melocactus schatzlii	VU	RL
Melocactus violaceus	Melocactus violaceus	VU	RL
Melocactus zehntneri	Melocactus zehntneri	LC	RL
Mentha cervina	Mentha cervina	NT	RL
Mentha suaveolens	Mentha insularis	LC	TPLsynonym
Metasequoia glyptostroboides	Metasequoia glyptostroboides	EN	RL
Microbiota decussata	Microbiota decussata	LC	RL
Microcachrys tetragona	Microcachrys tetragona	LC	RL
Mimosa pudica	Mimosa pudica	LC	RL
Minuartia verna	Minuartia smejkalii	DD	TPLsynonym
Minuartia verna subsp. verna	Minuartia smejkalii	DD	RLsynonym
Moraea huttonii	Moraea huttonii	LC	RL
Musschia aurea	Musschia aurea	LC	RL
Myosotis alpestris	Myosotis decumbens ssp. rifana	LC	RLsynonym
Myrica faya	Myrica faya	LR/lc	RL
Myriophyllum spicatum	Myriophyllum spicatum	LC	RL
Myristica fatua	Virola surinamensis	EN	TPLaccepted
Myristica fragrans	Myristica fragrans	DD	RL
Najas marina	Najas marina	LC	RL
Narcissus alcaracensis	Narcissus alcaracensis	EN	RL
Narcissus jonquilla	Narcissus jonquilla	DD	RL
Narcissus nevadensis	Narcissus nevadensis	EN	RL
Neobuxbaumia euphorbioides	Neobuxbaumia euphorbioides	VU	RL
Neobuxbaumia polylopha	Neobuxbaumia polylopha	VU	RL
Neodypsis leptocheilos	Dypsis leptocheilos	CR	TPLaccepted
Neoveitchia storckii	Neoveitchia storckii	EN	RL
Nephelium lappaceum	Nephelium lappaceum	LR/lc	RL
Nephrosperma vanhoutteanum	Nephrosperma van-houtteanum	LC	RLsynonym
Neptunia oleracea	Neptunia oleracea	LC	RL
Neptunia plena	Neptunia plena	LC	RL
Nerium oleander	Nerium oleander	LC	RL
Nigritella rhellicani	Gymnadenia rhellicani	LC	TPLaccepted
Nopalea cochenillifera	Nopalea cochenillifera	DD	RL
Nopalea dejecta	Nopalea dejecta	DD	RL
Notocactus arnostianus	Parodia arnostiana	CR	TPLaccepted
Notocactus carambeiensis	Parodia carambeiensis	LC	TPLaccepted
Notocactus horstii	Parodia horstii	EN	RLsynonym
Notocactus mammulosus	Parodia mammulosa	LC	TPLaccepted
Notocactus ottonis	Parodia ottonis	VU	TPLaccepted
Notocactus rutilans	Parodia mueller-melchersii	EN	TPLaccepted
Nymphaea caerulea	Nymphaea nouchali	LC	RLsynonym
Nymphaea capensis	Nymphaea nouchali	LC	RLsynonym
Nymphaea stellata	Nymphaea nouchali	LC	TPLaccepted
Nymphaea tetragona	Nymphaea tetragona	LC	RL
Obregonia denegrii	Obregonia denegrii	EN	RL
Ochanostachys amentacea	Ochanostachys amentacea	DD	RL
Ocotea foetens	Ocotea foetens	LR/nt	RL
Octomeles sumatrana	Octomeles sumatrana	LR/lc	RL
Oenanthe conioides	Oenanthe conioides	DD	RL
Oenanthe javanica	Oenanthe javanica	LC	RL
Oenanthe silaifolia	Oenanthe divaricata	LC	TPLsynonym
Olearia traversii	Olearia traversii	LR/nt	RL
Onobrychis arenaria	Onobrychis viciifolia	LC	TPLsynonym
Onobrychis viciifolia	Onobrychis viciifolia	LC	RL
Onopordum carduelium	Onopordum carduelium	CR	RL
Onopordum nogalesii	Onopordum nogalesii	CR	RL
Opuntia anacantha	Opuntia anacantha	LC	RL
Opuntia aureispina	Opuntia aureispina	LC	RL
Opuntia elatior	Opuntia elatior	LC	RL
Opuntia engelmannii	Opuntia engelmannii	LC	RL
Opuntia ficus-indica	Opuntia ficus-indica	DD	RL
Opuntia fragilis	Opuntia fragilis	LC	RL
Opuntia humifusa	Opuntia humifusa	LC	RL
Opuntia hyptiacantha	Opuntia hyptiacantha	LC	RL
Opuntia inamoena	Tacinga inamoena	LC	TPLaccepted
Opuntia inermis	Opuntia stricta	LC	TPLaccepted
Opuntia leptocaulis	Cylindropuntia leptocaulis	LC	TPLaccepted
Opuntia leucotricha	Opuntia leucotricha	LC	RL
Opuntia macrocentra	Opuntia macrocentra	LC	RL
Opuntia macrorhiza subsp. macrorhiza	Opuntia macrorhiza	LC	TPLaccepted
Opuntia microdasys	Opuntia microdasys	LC	RL
Opuntia microdasys var. rufida	Opuntia rufida	LC	TPLsynonym
Opuntia phaeacantha	Opuntia phaeacantha	LC	RL
Opuntia polyacantha	Opuntia polyacantha	LC	RL
Opuntia robusta	Opuntia robusta	LC	RL
Opuntia streptacantha	Opuntia streptacantha	LC	RL
Opuntia tomentosa	Opuntia tomentosa	LC	RL
Opuntia vulgaris	Opuntia ficus-indica	DD	TPLaccepted
Oreocereus doelzianus	Oreocereus doelzianus	LC	RL
Oreocereus hendriksenianus	Oreocereus leucotrichus	LC	RLsynonym
Origanum dictamnus	Origanum dictamnus	NT	RL
Othonna clavifolia	Othonna clavifolia	LC	RL
Paeonia officinalis subsp. banatica	Paeonia officinalis ssp. banatica	DD	RL
Palaquium bataanense	Palaquium bataanense	VU	RL
Pandanus odoratissimus	Pandanus odorifer	LC	TPLaccepted
Pandanus veitchii	Pandanus papenooensis	LR/nt	TPLsynonym
Panicum virgatum	Panicum sumatrense	LC	RLsynonym
Parmentiera cereifera	Parmentiera cereifera	EN	RL
Parodia ayopayana	Parodia ayopayana	LC	RL
Parodia buiningii	Parodia buiningii	CR	RL
Parodia cardenasii	Parodia formosa	LC	TPLsynonym
Parodia comarapana	Parodia comarapana	LC	RL
Parodia concinna	Parodia concinna	VU	RL
Parodia erinacea	Parodia erinacea	LC	RL
Parodia haselbergii	Parodia haselbergii	VU	RL
Parodia leninghausii	Parodia leninghausii	EN	RL
Parodia maassii	Parodia maassii	LC	RL
Parodia magnifica	Parodia magnifica	EN	RL
Parodia microsperma	Parodia microsperma	LC	RL
Parodia mueller-melchersii	Parodia mueller-melchersii	EN	RL
Parodia muricata	Parodia muricata	EN	RL
Parodia rudibuenekeri	Parodia rudibuenekeri	EN	RL
Parodia schumanniana	Parodia schumanniana	VU	RL
Parodia schwebsiana	Parodia schwebsiana	LC	RL
Parodia scopa	Parodia scopa	VU	RL
Parodia tenuicylindrica	Parodia tenuicylindrica	EN	RL
Paspalum conjugatum	Paspalum conjugatum	LC	RL
Patellifolia patellaris	Patellifolia webbiana	CR	TPLsynonym
Pelagodoxa henryana	Pelagodoxa henryana	CR	RL
Pennisetum macrourum	Pennisetum macrourum	LC	RL
Pentaspadon motleyi	Pentaspadon motleyi	DD	RL
Pereskia aculeata	Pereskia aculeata	LC	RL
Pericallis hadrosoma	Pericallis hadrosoma	CR	RL
Persea gratissima	Persea floccosa	VU	TPLsynonym
Persea indica	Persea indica	LR/cd	RL
Persicaria lapathifolia	Persicaria lapathifolia	LC	RL
Persicaria maculosa	Persicaria maculosa	LC	RL
Pfeiffera ianthothele	Pfeiffera ianthothele	LC	RL
Phaedranassa tunguraguae	Phaedranassa tunguraguae	EN	RL
Phagnalon saxatile	Phagnalon bennettii	LC	TPLsynonym
Phaseolus lunatus	Phaseolus rosei	EN	TPLsynonym
Phleum alpinum	Phleum alpinum	LC	RL
Phleum montanum	Phleum montanum	LC	RL
Pholidocarpus majadum	Pholidocarpus majadum	LC	RL
Phragmites australis	Phragmites australis	LC	RL
Phyla nodiflora	Phyla nodiflora	LC	RL
Phyllanthus arbuscula	Phyllanthus arbuscula	LR/nt	RL
Physoplexis comosa	Physoplexis comosa	LC	RL
Picea abies	Picea abies	LC	RL
Picea glauca	Picea glauca	LC	RL
Picea mariana	Picea mariana	LC	RL
Picea morinda	Picea smithiana	LC	TPLaccepted
Picea omorika	Picea omorika	EN	RL
Picea orientalis	Picea orientalis	LC	RL
Picea polita	Picea torano	VU	TPLaccepted
Picea pungens	Picea pungens	LC	RL
Picea rubens	Picea rubens	LC	RL
Picea sitchensis	Picea sitchensis	LC	RL
Picrasma excelsa	Picrasma excelsa	VU	RL
Pilosocereus leucocephalus	Pilosocereus leucocephalus	LC	RL
Pilosocereus royenii	Pilosocereus royenii	LC	RL
Pilularia globulifera	Pilularia globulifera	NT	RL
Pinguicula vulgaris	Pinguicula fontiqueriana	VU	RLsynonym
Pinus armandii	Pinus armandii	LC	RL
Pinus banksiana	Pinus banksiana	LC	RL
Pinus brutia	Pinus brutia	LC	RL
Pinus bungeana	Pinus bungeana	LC	RL
Pinus cembra	Pinus cembra	LC	RL
Pinus contorta	Pinus contorta	LC	RL
Pinus coulteri	Pinus coulteri	NT	RL
Pinus dalmatica	Pinus nigra ssp. dalmatica	EN	RLsynonym
Pinus densiflora	Pinus densiflora	LC	RL
Pinus eldarica	Pinus brutia var. eldarica	NT	TPLaccepted
Pinus griffithii	Larix griffithii	LC	TPLaccepted
Pinus halepensis	Pinus halepensis	LC	RL
Pinus heldreichii	Pinus heldreichii	LC	RL
Pinus koraiensis	Pinus koraiensis	LC	RL
Pinus lambertiana	Pinus lambertiana	LC	RL
Pinus longifolia	Pinus palustris	EN	TPLaccepted
Pinus massoniana	Pinus massoniana	LC	RL
Pinus merkusii	Pinus merkusii	VU	RL
Pinus montezumae	Pinus montezumae	LC	RL
Pinus mugo	Pinus mugo	LC	RL
Pinus mugo subsp. uncinata	Pinus uncinata	LC	TPLaccepted
Pinus nigra	Pinus nigra	LC	RL
Pinus pallasiana	Pinus nigra ssp. pallasiana	LC	RLsynonym
Pinus patula	Pinus patula	LC	RL
Pinus peuce	Pinus peuce	NT	RL
Pinus pinaster	Pinus pinaster	LC	RL
Pinus pinea	Pinus pinea	LC	RL
Pinus ponderosa	Pinus ponderosa	LC	RL
Pinus pumila	Pinus pumila	LC	RL
Pinus pungens	Pinus pungens	LC	RL
Pinus radiata	Pinus radiata	EN	RL
Pinus rigida	Pinus rigida	LC	RL
Pinus roxburghii	Pinus roxburghii	LC	RL
Pinus sibirica	Pinus sibirica	LC	RL
Pinus strobiformis	Pinus strobiformis	LC	RL
Pinus strobus	Pinus strobus	LC	RL
Pinus sylvestris	Pinus sylvestris	LC	RL
Pinus taeda	Pinus taeda	LC	RL
Pinus wallichiana	Pinus wallichiana	LC	RL
Pistacia vera	Pistacia vera	NT	RL
Pistia stratiotes	Pistia stratiotes	LC	RL
Pittosporum pauciflorum	Pittosporum pauciflorum	VU	RL
Plantago famarae	Plantago famarae	CR	RL
Platanus orientalis	Platanus orientalis	LR/lc	RL
Plectranthus socotranus	Plectranthus socotranus	LC	RL
Pleione formosana	Pleione formosana	VU	RL
Pleuropetalum darwinii	Pleuropetalum darwinii	VU	RL
Poa angustifolia	Poa angustifolia	LC	RL
Poa annua	Poa annua	LC	RL
Poa pratensis	Poa angustifolia	LC	TPLsynonym
Poa trivialis subsp. trivialis	Poa angustifolia	LC	TPLsynonym
Podocarpus elatus	Podocarpus elatus	LC	RL
Podocarpus falcatus	Afrocarpus falcatus	LC	TPLaccepted
Podocarpus macrophyllus	Podocarpus macrophyllus	LC	RL
Podocarpus nagi	Nageia nagi	NT	TPLaccepted
Podocarpus neriifolius	Podocarpus neriifolius	LC	RL
Podocarpus salignus	Podocarpus salignus	VU	RL
Poecilanthe parviflora	Poecilanthe parviflora	DD	RL
Pogonatherum paniceum	Pogonatherum paniceum	LC	RL
Pongamia pinnata	Pongamia pinnata	LC	RL
Populus nigra	Populus nigra	LC	RL
Potamogeton alpinus	Potamogeton alpinus	LC	RL
Potamogeton lucens	Potamogeton lucens	LC	RL
Potamogeton natans	Potamogeton natans	LC	RL
Potamogeton perfoliatus	Potamogeton perfoliatus	LC	RL
Potentilla delphinensis	Potentilla delphinensis	VU	RL
Potentilla nevadensis	Potentilla maura	NT	RLsynonym
Primula apennina	Primula apennina	VU	RL
Primula glaucescens	Primula glaucescens	LC	RL
Primula palinuri	Primula palinuri	EN	RL
Primula scandinavica	Primula scandinavica	NT	RL
Prosopis alba	Prosopis alba	LR/nt	RL
Prumnopitys amara	Sundacarpus amarus	LC	TPLaccepted
Prunus arborea	Prunus arborea	LR/lc	RL
Prunus brigantina	Prunus brigantina	DD	RL
Prunus cocomilia	Prunus cocomilia	LR/lc	RL
Prunus ramburii	Prunus ramburii	VU	RL
Pseudarrhenatherum pallens	Pseudarrhenatherum pallens	EN	RL
Pseudolarix amabilis	Pseudolarix amabilis	VU	RL
Pseudolobivia calorubra	Echinopsis calorubra	LC	TPLsynonym
Pseudorhipsalis amazonica	Pseudorhipsalis amazonica	LC	RL
Pseudorhipsalis ramulosa	Pseudorhipsalis ramulosa	LC	RL
Pseudosamanea cubana	Pseudosamanea cubana	VU	RL
Pseudotsuga menziesii	Pseudotsuga menziesii	LC	RL
Pteris vittata	Pteris vittata	LC	RL
Pterocarpus indicus	Pterocarpus indicus	VU	RL
Pterocarya pterocarpa	Pterocarya pterocarpa	LR/lc	RL
Pterogyne nitens	Pterogyne nitens	LR/nt	RL
Pterostyrax psilophyllus	Pterostyrax psilophyllus	VU	RL
Pulsatilla grandis	Pulsatilla grandis	LC	RL
Pulsatilla halleri subsp. slavica	Pulsatilla slavica	DD	TPLsynonym
Pulsatilla vulgaris subsp. gotlandica	Pulsatilla grandis	LC	TPLsynonym
Punica granatum	Punica granatum	LC	RL
Puya raimondii	Puya raimondii	EN	RL
Pyrus cajon	Pyrus cajon	EN	RL
Pyrus salicifolia	Pyrus salicifolia	LR/nt	RL
Quercus glauca	Cyclobalanopsis repandifolia	CR	TPLsynonym
Quercus macrocarpa	Quercus macrocarpa	LR/lc	RL
Quercus robur	Quercus robur	LC	RL
Quercus rubra	Quercus acerifolia	EN	TPLsynonym
Quercus x hispanica	Quercus dentata	LR/lc	TPLsynonym
Ramonda serbica	Ramonda serbica	LC	RL
Ranunculus aquatilis	Ranunculus penicillatus	LC	RLsynonym
Ranunculus granatensis	Ranunculus granatensis	LC	RL
Rebutia deminuta	Rebutia deminuta	LC	RL
Rebutia fiebrigii	Rebutia fiebrigii	LC	RL
Rebutia minuscula	Rebutia minuscula	LC	RL
Rebutia pulvinosa	Rebutia pulvinosa	DD	RL
Rebutia ritteri	Rebutia ritteri	LC	RL
Rebutia steinmannii	Rebutia steinmannii	LC	RL
Reutealis trisperma	Reutealis trisperma	VU	RL
Rhamnus crenulata	Rhamnus crenulata	LR/nt	RL
Rhaponticum cynaroides	Stemmacantha cynaroides	EN	TPLsynonym
Rhipsalis campos-portoana	Rhipsalis campos-portoana	LC	RL
Rhipsalis capilliformis	Rhipsalis teres	LC	TPLaccepted
Rhipsalis cereuscula	Rhipsalis cereuscula	LC	RL
Rhipsalis clavata	Rhipsalis clavata	NT	RL
Rhipsalis ewaldiana	Rhipsalis ewaldiana	DD	RL
Rhipsalis floccosa	Rhipsalis floccosa	LC	RL
Rhipsalis grandiflora	Rhipsalis grandiflora	LC	RL
Rhipsalis houlletiana	Lepismium houlletianum	LC	TPLaccepted
Rhipsalis lorentziana	Lepismium lorentzianum	LC	TPLsynonym
Rhipsalis lumbricoides	Lepismium lumbricoides	LC	TPLaccepted
Rhipsalis megalantha	Rhipsalis neves-armondii	LC	TPLaccepted
Rhipsalis mesembryanthemoides	Rhipsalis mesembryanthemoides	CR	RL
Rhipsalis micrantha	Rhipsalis micrantha	LC	RL
Rhipsalis pachyptera	Rhipsalis pachyptera	LC	RL
Rhipsalis pilocarpa	Rhipsalis pilocarpa	VU	RL
Rhipsalis warmingiana	Lepismium warmingianum	LC	TPLaccepted
Rhodocactus grandifolius	Pereskia grandifolia	LC	TPLaccepted
Rhododendron ferrugineum	Rhododendron ferrugineum	LC	RL
Rhododendron hirsutum	Rhododendron hirsutum	LC	RL
Rhopaloblaste augusta	Rhopaloblaste augusta	VU	RL
Rhopalostylis baueri	Rhopalostylis baueri var. cheesemanii	LR/cd	TPLsynonym
Rhopalostylis sapida	Rhopalostylis sapida	LR/cd	RL
Rhus coriaria	Rhus coriaria	VU	RL
Rhynchosia phaseoloides	Rhynchosia pyramidalis	LC	RLsynonym
Rhynchosia pyramidalis	Rhynchosia pyramidalis	LC	RL
Rhynchosinapis cheiranthos	Brassica montana	LC	TPLsynonym
Ribes janczewskii	Ribes janczewskii	LC	RL
Robinia pseudacacia	Robinia pseudoacacia	LC	TPLaccepted
Rooksbya euphorbioides	Neobuxbaumia euphorbioides	VU	TPLaccepted
Rosa pendulina	Rosa pendulina	LC	RL
Roystonea regia	Roystonea regia var. hondurensis	CR	TPLsynonym
Sabal bermudana	Sabal bermudana	EN	RL
Saccopetalum horsfieldii	Saccopetalum prolificum	VU	TPLsynonym
Sagittaria sagittifolia	Sagittaria sagittifolia	LC	RL
Salicornia emerici	Salicornia veneta	VU	TPLsynonym
Salvinia natans	Salvinia natans	LC	RL
Samaipaticereus corroanus	Samaipaticereus corroanus	LC	RL
Samolus valerandi	Samolus valerandi	LC	RL
Sanguisorba dodecandra	Sanguisorba dodecandra	NT	RL
Santalum album	Santalum album	VU	RL
Santolina elegans	Santolina elegans	VU	RL
Santolina oblongifolia	Santolina oblongifolia	NT	RL
Sapium indicum	Excoecaria indica	DD	TPLsynonym
Sarracenia alata	Sarracenia alata	LR/nt	RL
Sarracenia flava	Sarracenia flava	LR/lc	RL
Sarracenia leucophylla	Sarracenia leucophylla	VU	RL
Sarracenia oreophila	Sarracenia oreophila	CR	RL
Sarracenia rubra subsp. alabamensis	Sarracenia rubra ssp. alabamensis	CR	RL
Sarracenia rubra subsp. gulfensis	Sarracenia rubra ssp. gulfensis	EN	RL
Sarracenia rubra subsp. wherryi	Sarracenia rubra ssp. wherryi	EN	RL
Saruma henryi	Saruma henryi	EN	RL
Satakentia liukiuensis	Satakentia liukiuensis	DD	RL
Sauromatum venosum	Sauromatum venosum	LC	RL
Saxifraga callosa	Saxifraga florulenta	LC	TPLsynonym
Saxifraga vayredana	Saxifraga vayredana	LC	RL
Scaphium macropodum	Scaphium macropodum	LR/lc	RL
Schivereckia podolica	Schivereckia podolica	LC	RL
Schoenoplectus lacustris	Schoenoplectus lacustris	LC	RL
Schoenus nigricans	Schoenus nigricans	LC	RL
Schotia afra	Schotia afra	LC	RL
Sciadopitys verticillata	Sciadopitys verticillata	NT	RL
Scilla litardierei	Scilla litardierei	DD	RL
Scilla madeirensis	Scilla madeirensis	LC	RL
Scirpoides holoschoenus	Scirpoides holoschoenus	LC	RL
Scirpus mucronatus	Schoenoplectus mucronatus	LC	RLsynonym
Scrophularia herminii	Scrophularia herminii	DD	RL
Sequoia sempervirens	Sequoia sempervirens	EN	RL
Sequoiadendron giganteum	Sequoiadendron giganteum	EN	RL
Serratula lycopifolia	Klasea lycopifolia	DD	TPLaccepted
Seticereus icosagonus	Cleistocactus icosagonus	LC	TPLaccepted
Shorea balangeran	Shorea balangeran	CR	RL
Shorea johorensis	Shorea johorensis	CR	RL
Shorea lamellata	Shorea lamellata	CR	RL
Shorea leprosula	Shorea leprosula	EN	RL
Shorea selanica	Shorea selanica	CR	RL
Shorea seminis	Shorea seminis	CR	RL
Shorea smithiana	Shorea smithiana	CR	RL
Sibiraea altaiensis	Sibiraea altaiensis	DD	RL
Sideritis discolor	Sideritis discolor	CR	RL
Sideritis scardica	Sideritis scardica	NT	RL
Silene cintrana	Silene longicilia	LC	TPLaccepted
Silene hifacensis	Silene hifacensis	EN	RL
Sinapidendron angustifolium	Sinapidendron angustifolium	CR	RL
Sinojackia xylocarpa	Sinojackia xylocarpa	VU	RL
Sinowilsonia henryi	Sinowilsonia henryi	LR/nt	RL
Sisymbrella aspera	Sisymbrella aspera	LC	RL
Sisymbrium cavanillesianum	Sisymbrium cavanillesianum	VU	RL
Sonchus arvensis	Sonchus mauritanicus	NT	RLsynonym
Sophora flavescens	Sophora flavescens	LC	RL
Sorbus anglica	Sorbus anglica	VU	RL
Sorbus arranensis	Sorbus arranensis	VU	RL
Sorbus bristoliensis	Sorbus bristoliensis	EN	RL
Sorbus commixta	Sorbus amabilis	VU	TPLsynonym
Sorbus foliolosa	Sorbus wallichii	LR/lc	TPLsynonym
Sorbus leptophylla	Sorbus leptophylla	CR	RL
Sorbus leyana	Sorbus leyana	CR	RL
Sorbus tianschanica	Sorbus tianschanica	LC	RL
Sorbus vexans	Sorbus vexans	VU	RL
Sorbus wilmottiana	Sorbus wilmottiana	CR	RL
Sparganium emersum	Sparganium emersum	LC	RL
Sphenoclea zeylanica	Sphenoclea zeylanica	LC	RL
Spirodela polyrhiza	Spirodela polyrhiza	LC	RL
Stemmacantha rhapontica subsp. lamarckii	Rhaponticum scariosum	LC	TPLaccepted
Stemmadenia tomentosa	Stemmadenia tomentosa	LR/lc	RL
Stenocactus crispatus	Stenocactus crispatus	DD	RL
Stenocactus multicostatus	Stenocactus multicostatus	DD	RL
Stenocactus obvallatus	Stenocactus obvallatus	DD	RL
Stenocactus phyllacanthus	Stenocactus phyllacanthus	DD	RL
Stenocereus eruca	Stenocereus eruca	LC	RL
Stipa lessingiana	Stipa lessingiana	LC	RL
Stipa pennata	Stipa veneta	EN	TPLsynonym
Strombocactus disciformis	Strombocactus disciformis	VU	RL
Sulcorebutia candiae	Rebutia arenacea	NT	TPLsynonym
Sulcorebutia canigueralii	Rebutia canigueralii	LC	TPLsynonym
Sulcorebutia kruegeri	Rebutia steinbachii	LC	TPLsynonym
Swietenia macrophylla	Swietenia macrophylla	VU	RL
Swietenia mahagoni	Swietenia mahagoni	EN	RL
Syringa josikaea	Syringa josikaea	DD	RL
Syzygium discophorum	Syzygium discophorum	EN	RL
Syzygium pycnanthum	Syzygium densiflorum	VU	TPLsynonym
Tabebuia impetiginosa	Tabebuia impetiginosa	LR/lc	RL
Taxodium distichum	Taxodium distichum	LC	RL
Taxodium mucronatum	Taxodium mucronatum	LC	RL
Taxus baccata	Taxus baccata	LC	RL
Taxus brevifolia	Taxus brevifolia	NT	RL
Taxus cuspidata	Taxus cuspidata	LC	RL
Taxus wallichiana var. chinensis	Taxus chinensis	EN	TPLsynonym
Teline linifolia	Teline rosmarinifolia	EN	TPLsynonym
Teline nervosa	Teline nervosa	CR	RL
Terminalia catappa	Terminalia intermedia	EN	TPLsynonym
Terminalia ivorensis	Terminalia ivorensis	VU	RL
Tetraclinis articulata	Tetraclinis articulata	LC	RL
Tetrameles nudiflora	Tetrameles nudiflora	LR/lc	RL
Teucrium betonicum	Teucrium betonicum	LC	RL
Thelocactus fossulatus	Thelocactus hexaedrophorus	LC	TPLaccepted
Thelocactus macdowellii	Thelocactus macdowellii	NT	RL
Thelocactus rinconensis	Thelocactus rinconensis	LC	RL
Thermopsis montana	Thermopsis montana	LC	RL
Thermopsis rhombifolia	Thermopsis montana	LC	TPLsynonym
Thuja koraiensis	Thuja koraiensis	VU	RL
Thuja occidentalis	Thuja occidentalis	LC	RL
Thuja orientalis	Platycladus orientalis	NT	TPLaccepted
Thuja plicata	Thuja plicata	LC	RL
Thuja standishii	Thuja standishii	NT	RL
Thujopsis dolabrata	Thujopsis dolabrata	LC	RL
Thymus camphoratus	Thymus camphoratus	NT	RL
Tilia platyphyllos	Tilia platyphyllos	LC	RL
Tillandsia cyanea	Tillandsia cyanea	NT	RL
Tillandsia fasciculata var. latispica	Tillandsia fasciculata	LC	TPLaccepted
Torreya californica	Torreya californica	VU	RL
Torreya grandis	Torreya grandis	LC	RL
Torreya nucifera	Torreya nucifera	LC	RL
Trapa natans	Trapa natans	LC	RL
Trifolium angustifolium	Trifolium angustifolium	LC	RL
Trifolium canescens	Trifolium canescens	LC	RL
Trifolium incarnatum	Trifolium incarnatum	LC	RL
Trifolium ochroleucon	Trifolium caucasicum	LC	RLsynonym
Trifolium pratense	Trifolium pratense	LC	RL
Trifolium scabrum	Trifolium scabrum	LC	RL
Trifolium subterraneum	Trifolium subterraneum	LC	RL
Trithrinax brasiliensis	Trithrinax brasiliensis	DD	RL
Tropaeolum huigrense	Tropaeolum huigrense	VU	RL
Tsuga canadensis	Tsuga canadensis	NT	RL
Tsuga diversifolia	Tsuga diversifolia	LC	RL
Tsuga mertensiana	Tsuga mertensiana	LC	RL
Tsuga sieboldii	Tsuga sieboldii	NT	RL
Tulipa urumoffii	Tulipa hungarica	NT	TPLaccepted
Turbinicarpus alonsoi	Turbinicarpus alonsoi	CR	RL
Turbinicarpus beguinii	Turbinicarpus beguinii	LC	RL
Turbinicarpus laui	Turbinicarpus laui	CR	RL
Turbinicarpus swobodae	Turbinicarpus swobodae	CR	RL
Turbinicarpus valdezianus	Turbinicarpus valdezianus	VU	RL
Turbinicarpus viereckii	Turbinicarpus viereckii	LC	RL
Typha angustifolia	Typha angustifolia	LC	RL
Typha domingensis	Typha domingensis	LC	RL
Ulex europaeus	Ulex europaeus	LC	RL
Urtica kioviensis	Urtica kioviensis	DD	RL
Utricularia gibba	Utricularia gibba	LC	RL
Utricularia minor	Utricularia minor	LC	RL
Vatica venulosa	Vatica venulosa	CR	RL
Veitchia arecina	Veitchia macdanielsii	LR/lc	TPLsynonym
Veronica anagallis-aquatica	Veronica anagallis-aquatica	LC	RL
Veronica anagalloides	Veronica anagalloides	LC	RL
Veronica beccabunga	Veronica beccabunga	LC	RL
Veronica repens	Veronica repens	LC	RL
Veronica spicata	Veronica euxina	DD	TPLsynonym
Verschaffeltia splendida	Verschaffeltia splendida	NT	RL
Viburnum lantana	Viburnum maculatum	DD	TPLsynonym
Vicia cracca	Vicia tenuifolia	LC	RLsynonym
Vicia orobus	Vicia orobus	LC	RL
Vicia pisiformis	Vicia pisiformis	LC	RL
Vicia tenuifolia	Vicia tenuifolia	LC	RL
Viola bubanii	Viola hispida	CR	TPLsynonym
Visnea mocanera	Visnea mocanera	LR/cd	RL
Vitis vinifera	Vitis vinifera	LC	RL
Vriesea heliconioides	Vriesea heliconioides	LC	RL
Wachendorfia thyrsiflora	Wachendorfia thyrsiflora	DD	RL
Washingtonia filifera	Washingtonia filifera	LR/nt	RL
Weingartia neocumingii	Rebutia neocumingii	LC	TPLsynonym
Widdringtonia cedarbergensis	Widdringtonia cedarbergensis	CR	RL
Widdringtonia nodiflora	Widdringtonia nodiflora	LC	RL
Wilcoxia schmollii	Echinocereus schmollii	EN	TPLaccepted
Winterocereus aureispinus	Cleistocactus winteri	EN	TPLaccepted
Withania riebeckii	Withania riebeckii	LC	RL
Wodyetia bifurcata	Wodyetia bifurcata	LR/cd	RL
Wolffia arrhiza	Wolffia arrhiza	LC	RL
Wollemia nobilis	Wollemia nobilis	CR	RL
Xyris jupicai var. major	Xyris indica	LC	TPLsynonym
Zamia furfuracea	Zamia furfuracea	EN	RL
Zamia portoricensis	Zamia portoricensis	EN	RL
Zannichellia palustris	Zannichellia palustris	LC	RL
Zelkova carpinifolia	Zelkova carpinifolia	LR/nt	RL
Ziziphus jujuba	Ziziphus jujuba	LC	RL
Zygophyllum kaschgaricum	Zygophyllum kaschgaricum	DD	RL
