# Supplementary material for: Integrating Biodiversity Data into Botanic Collections
Source: Biodivers Data J. 2016 May 20;(4):e7971. doi: 10.3897/BDJ.4.e7971 (PMC4910503; doi:10.3897/BDJ.4.e7971)
Supplement: Supplementary material 6 — Taxa found at GISIN [file biodiversity_data_journal-4-e7971-s006.csv]

Taxon	alternative	type	GISINstatus
Abies concolor var. concolor	Abies concolor	Accepted	Exotic
Abronia fragrans		original	Exotic
Abutilon theophrasti		original	Invasive
Acacia dealbata		original	Invasive
Acacia mearnsii		original	Invasive
Acacia melanoxylon		original	Invasive
Acacia armata	Acacia paradoxa	Accepted	Exotic
Acer negundo		original	Invasive
Acer platanoides		original	Invasive
Acer pseudoplatanus		original	Invasive
Acer saccharinum		original	Exotic
Acer saccharum		original	Exotic
Acer tataricum ssp. ginnala	Acer ginnala	Synonym	Invasive
Achillea millefolium		original	Exotic
Achyranthes bidentata	Achyranthes japonica	Synonym	Not exotic and harmful
Adenanthera pavonina		original	Invasive
Aegilops cylindrica		original	Exotic
Aegilops triuncialis		original	Exotic
Aegopodium podagraria		original	Exotic
Ageratina adenophora		original	Exotic
Ageratum houstonianum		original	Invasive
Agropyron pectiniforme	Agropyron cristatum	Accepted	Exotic
Agropyron desertorum		original	Exotic
Agrostis capillaris		original	Invasive
Agrostis gigantea		original	Exotic
Agrostis stolonifera		original	Exotic
Ailanthus altissima		original	Invasive
Aira caryophyllea		original	Exotic
Aira praecox		original	Exotic
Akebia quinata		original	Invasive
Albizia julibrissin		original	Invasive
Alhagi pseudalhagi		original	Exotic
Alliaria petiolata		original	Invasive
Allium angulosum	Allium triquetrum	Synonym	Exotic
Allium neapolitanum	Nothoscordum inodorum	Synonym	Exotic
Allium thunbergii	Allium triquetrum	Synonym	Exotic
Allium triquetrum		original	Exotic
Allium vineale		original	Invasive
Alnus glutinosa		original	Exotic
Alopecurus arundinaceus	Alopecurus pratensis	Synonym	Exotic
Alopecurus geniculatus		original	Exotic
Alopecurus myosuroides		original	Exotic
Alopecurus pratensis		original	Exotic
Alyssum alyssoides		original	Exotic
Amaranthus albus		original	Invasive
Amaranthus blitoides		original	Invasive
Amaranthus blitum	Amaranthus albus	Synonym	Invasive
Ambrosia artemisiifolia		original	Invasive
Ambrosia trifida		original	Invasive
Amelanchier alnifolia		original	Exotic
Amelanchier utahensis	Amelanchier alnifolia	Synonym	Exotic
Ammophila arenaria		original	Exotic
Amorpha fruticosa		original	Invasive
Ampelopsis glandulosa var. brevipedunculata	Ampelopsis brevipedunculata	Synonym	Invasive
Anagallis arvensis		original	Exotic
Anaphalis margaritacea		original	Exotic
Anthemis arvensis		original	Invasive
Anthemis cotula		original	Exotic
Anthoxanthum odoratum		original	Exotic
Anthriscus caucalis		original	Exotic
Anthriscus sylvestris		original	Exotic
Antigonon leptopus		original	Invasive
Apium graveolens		original	Invasive
Apocynum cannabinum		original	Exotic
Aquilegia flabellata var. pumila	Aquilegia vulgaris	Misapplied	Exotic
Aquilegia vulgaris		original	Exotic
Aralia elata		original	Not exotic and harmful
Arctium minus		original	Exotic
Arctotheca calendula		original	Exotic
Ardisia crenata		original	Invasive
Ardisia littoralis	Ardisia elliptica	Accepted	Invasive
Ardisia humilis	Ardisia elliptica	Misapplied	Invasive
Arnica chamissonis		original	Exotic
Arrhenatherum elatius		original	Invasive
Artemisia absinthium		original	Exotic
Artemisia biennis		original	Exotic
Artemisia campestris		original	Exotic
Artemisia dracunculus		original	Exotic
Artemisia vulgaris		original	Exotic
Arundo donax		original	Invasive
Asparagus asparagoides		original	Exotic
Asparagus densiflorus		original	Invasive
Asparagus officinalis		original	Exotic
Asphodelus fistulosus		original	Exotic
Atriplex micrantha		original	Exotic
Atriplex sagittata	Atriplex micrantha	Synonym	Exotic
Atriplex semibaccata		original	Exotic
Avena barbata		original	Exotic
Avena fatua		original	Exotic
Avena sativa		original	Exotic
Azolla filiculoides		original	Invasive
Azolla pinnata		original	Invasive
Barbarea vulgaris		original	Invasive
Bassia hyssopifolia		original	Exotic
Bauhinia variegata		original	Exotic
Begonia semperflorens	Begonia cucullata	Accepted	Invasive
Bellis perennis		original	Exotic
Berberis darwinii		original	Exotic
Mahonia repens		original	Exotic
Berberis thunbergii		original	Invasive
Berberis vulgaris		original	Invasive
Berteroa incana		original	Exotic
Betula pendula		original	Exotic
Bidens pilosa		original	Invasive
Brachiaria mutica	Urochloa mutica	Synonym	Invasive
Brachypodium distachyon		original	Exotic
Brachypodium sylvaticum		original	Exotic
Brassica nigra		original	Exotic
Brassica campestris	Brassica rapa	Accepted	Exotic
Brassica tournefortii		original	Invasive
Briza maxima		original	Exotic
Bromus arvensis		original	Exotic
Bromus biebersteinii	Bromus inermis	Synonym	Invasive
Bromus catharticus		original	Invasive
Bromus diandrus		original	Exotic
Bromus erectus	Bromus arvensis	Synonym	Exotic
Bromus hordeaceus		original	Exotic
Bromopsis inermis	Bromus inermis	Accepted	Invasive
Bromus japonicus		original	Exotic
Bromus madritensis	Bromus diandrus	Synonym	Exotic
Bromus racemosus		original	Exotic
Bromus rigidus	Bromus rubens	Synonym	Invasive
Bromus rubens		original	Invasive
Bromus secalinus		original	Exotic
Bromus tectorum		original	Invasive
Broussonetia papyrifera		original	Exotic
Bryophyllum pinnatum	Kalanchoe pinnata	Synonym	Invasive
Buddleja davidii		original	Exotic
Butomus umbellatus		original	Invasive
Caesalpinia gilliesii		original	Exotic
Cakile maritima		original	Exotic
Callitriche stagnalis		original	Exotic
Calystegia sepium ssp. sepium	Calystegia sepium	Accepted	Exotic
Camelina microcarpa		original	Exotic
Campanula rapunculoides		original	Exotic
Capsella bursa	Capsella bursa-pastoris	Accepted	Exotic
Capsella bursa-pastoris		original	Exotic
Caragana arborescens		original	Not exotic and harmful
Cardamine impatiens		original	Exotic
Carduus acanthoides		original	Exotic
Carduus crispus		original	Exotic
Carduus nutans		original	Invasive
Carduus tenuiflorus		original	Exotic
Carex disticha		original	Exotic
Carex flacca		original	Exotic
Carex kobomugi		original	Not exotic and harmful
Carthamus lanatus		original	Exotic
Carum carvi		original	Exotic
Casuarina cunninghamiana		original	Exotic
Casuarina equisetifolia		original	Invasive
Celastrus orbiculatus		original	Invasive
Pennisetum incomptum	Pennisetum ciliare	Synonym	Invasive
Centaurea biebersteinii		original	Invasive
Centaurea calcitrapa		original	Exotic
Centaurea jacea ssp. debeauxii	Centaurea debeauxii	Accepted	Exotic
Centaurea diffusa		original	Invasive
Centaurea jacea		original	Invasive
Centaurea melitensis		original	Invasive
Centaurea maculosa		original	Exotic
Centaurea solstitialis		original	Invasive
Centaurea stoebe		original	Not exotic and harmful
Centaurea jacea ssp. subjacea	Centaurea biebersteinii	Synonym	Invasive
Cerastium arvense		original	Exotic
Cerastium fontanum		original	Invasive
Ceratopteris thalictroides		original	Exotic
Cestrum nocturnum		original	Exotic
Cestrum parqui		original	Exotic
Chelidonium majus		original	Exotic
Chenopodium album		original	Exotic
Chenopodium glaucum		original	Exotic
Chenopodium murale		original	Exotic
Chenopodium opulifolium		original	Exotic
Chenopodium rubrum		original	Exotic
Chondrilla juncea		original	Exotic
Cichorium intybus		original	Exotic
Cinnamomum camphora		original	Invasive
Cirsium arvense		original	Invasive
Cirsium palustre		original	Exotic
Cirsium vulgare		original	Invasive
Cistus ladanifer ssp. sulcatus	Cistus ladanifer	Accepted	Exotic
Poncirus trifoliata		original	Exotic
Clematis orientalis		original	Exotic
Clematis terniflora		original	Invasive
Collomia cavanillesii	Collomia linearis	Synonym	Exotic
Collomia grandiflora		original	Exotic
Collomia linearis		original	Exotic
Colubrina asiatica		original	Invasive
Commelina communis		original	Not exotic and harmful
Conicosia pugioniformis		original	Exotic
Conium maculatum		original	Exotic
Conringia orientalis		original	Exotic
Convallaria majalis		original	Exotic
Convolvulus arvensis		original	Exotic
Cordyline australis		original	Exotic
Cornus sericea		original	Invasive
Cortaderia selloana		original	Invasive
Anthemis altissima	Anthemis arvensis	Synonym	Invasive
Cotoneaster franchetii		original	Exotic
Cotoneaster lacteus		original	Exotic
Cotoneaster pannosus		original	Exotic
Cotula coronopifolia		original	Invasive
Crataegus monogyna		original	Exotic
Crepis capillaris		original	Exotic
Crupina vulgaris		original	Exotic
Cupressus macrocarpa		original	Not exotic and harmful
Cuscuta campestris		original	Invasive
Centaurea cyanus		original	Exotic
Cynara cardunculus		original	Exotic
Cynodon dactylon		original	Invasive
Cynoglossum officinale		original	Invasive
Cynosurus echinatus		original	Exotic
Cytisus scoparius		original	Invasive
Cytisus striatus		original	Exotic
Dactylis glomerata		original	Invasive
Datura stramonium var. stramonium	Datura stramonium	Accepted	Invasive
Datura wrightii		original	Exotic
Delairea odorata		original	Exotic
Deschampsia media	Aira caryophyllea	Synonym	Exotic
Descurainia pinnata		original	Exotic
Descurainia sophia		original	Exotic
Dianthus armeria		original	Exotic
Digitalis grandiflora		original	Exotic
Digitalis lanata		original	Not exotic and harmful
Digitalis lutea		original	Exotic
Digitalis purpurea		original	Exotic
Digitalis viridiflora	Digitalis lutea	Misapplied	Exotic
Digitaria sanguinalis		original	Exotic
Dimorphotheca sinuata		original	Exotic
Dioscorea bulbifera		original	Invasive
Dioscorea polystachya		original	Not exotic and harmful
Dipsacus fullonum		original	Exotic
Dipsacus laciniatus		original	Exotic
Dipsacus sativus		original	Exotic
Bignonia unguis-cati	Macfadyena unguis-cati	Synonym	Invasive
Duchesnea indica		original	Invasive
Echinochloa crus-galli		original	Exotic
Echium candicans		original	Exotic
Echium creticum	Echium plantagineum	Synonym	Invasive
Echium plantagineum		original	Invasive
Elaeagnus angustifolia		original	Invasive
Elaeagnus pungens		original	Invasive
Elaeagnus umbellata		original	Invasive
Eleutherococcus sieboldianus		original	Not exotic and harmful
Elodea canadensis		original	Invasive
Elsholtzia ciliata		original	Exotic
Emex spinosa		original	Exotic
Epilobium angustifolium	Epilobium brachycarpum	Synonym	Exotic
Epilobium brachycarpum		original	Exotic
Epilobium ciliatum		original	Invasive
Epilobium hirsutum		original	Exotic
Epilobium parviflorum		original	Exotic
Equisetum arvense		original	Exotic
Eragrostis cilianensis		original	Exotic
Eragrostis curvula		original	Exotic
Eremopyrum triticeum		original	Exotic
Conyza canadensis		original	Invasive
Erigeron karvinskianus		original	Exotic
Erigeron speciosus		original	Exotic
Erodium botrys		original	Exotic
Erodium cicutarium		original	Invasive
Erodium moschatum		original	Exotic
Eruca vesicaria		original	Exotic
Erysimum repandum		original	Invasive
Eucalyptus rostrata	Eucalyptus camaldulensis	Accepted	Invasive
Eucalyptus globulus		original	Exotic
Eugenia uniflora		original	Invasive
Euonymus alatus		original	Not exotic and harmful
Euonymus fortunei		original	Exotic
Euonymus javanicus	Euonymus alatus	Synonym	Not exotic and harmful
Euphorbia cyparissias		original	Exotic
Euphorbia esula		original	Invasive
Euphorbia lathyris		original	Exotic
Euphorbia myrsinites		original	Exotic
Euphorbia oblongata		original	Exotic
Euryops multifidus		original	Invasive
Fallopia sachalinensis		original	Exotic
Festuca arundinacea		original	Exotic
Festuca filiformis		original	Exotic
Festuca trachyphylla		original	Exotic
Ranunculus ficaria		original	Invasive
Ficus carica		original	Exotic
Foeniculum vulgare		original	Exotic
Fragaria vesca		original	Invasive
Frangula alnus		original	Invasive
Fraxinus americana		original	Exotic
Fraxinus pennsylvanica		original	Invasive
Froelichia gracilis		original	Exotic
Fumaria officinalis ssp. officinalis	Fumaria officinalis	Accepted	Exotic
Fumaria vaillantii	Fumaria officinalis	Synonym	Exotic
Gaillardia aristata		original	Exotic
Galega officinalis		original	Not exotic and harmful
Galeopsis tetrahit		original	Exotic
Galium aparine		original	Exotic
Teline monspessulana	Genista monspessulana	Accepted	Exotic
Geranium dissectum		original	Exotic
Geranium molle		original	Exotic
Geranium pusillum		original	Exotic
Geranium pyrenaicum	Geranium molle	Synonym	Exotic
Geranium robertianum		original	Exotic
Geum japonicum	Geum macrophyllum	Accepted	Exotic
Glaucium flavum		original	Exotic
Glebionis coronaria	Chrysanthemum coronarium	Synonym	Exotic
Glechoma hederacea		original	Exotic
Gleditsia triacanthos		original	Exotic
Glyceria maxima		original	Invasive
Glycine max		original	Exotic
Grevillea robusta		original	Exotic
Grindelia squarrosa		original	Exotic
Gypsophila acutifolia		original	Not exotic and harmful
Gypsophila elegans		original	Not exotic and harmful
Gypsophila muralis		original	Not exotic and harmful
Gypsophila paniculata		original	Invasive
Gypsophila scorzonerifolia		original	Not exotic and harmful
Hedera helix ssp. canariensis	Hedera canariensis	Accepted	Exotic
Hedera helix		original	Invasive
Helianthus annuus		original	Exotic
Helminthotheca echioides		original	Exotic
Hemerocallis fulva		original	Exotic
Heracleum mantegazzianum		original	Invasive
Hesperis matronalis		original	Invasive
Hibiscus syriacus		original	Exotic
Hieracium lachenalii		original	Not exotic and harmful
Hieracium vulgatum	Hieracium lachenalii	Synonym	Not exotic and harmful
Hiptage benghalensis		original	Invasive
Hirschfeldia incana		original	Exotic
Holcus lanatus		original	Invasive
Hordeum jubatum		original	Exotic
Hordeum marinum		original	Exotic
Hordeum murinum		original	Exotic
Hordeum vulgare		original	Exotic
Humulus japonicus		original	Not exotic and harmful
Hydrocharis morsus-ranae		original	Invasive
Hyoscyamus niger		original	Exotic
Hypericum canariense		original	Exotic
Hypericum grandifolium	Hypericum canariense	Synonym	Exotic
Hypericum perforatum		original	Invasive
Hypochaeris glabra		original	Exotic
Hypochaeris radicata		original	Invasive
Ilex aquifolium		original	Exotic
Impatiens capensis		original	Exotic
Impatiens glandulifera		original	Invasive
Impatiens walleriana		original	Invasive
Imperata cylindrica		original	Invasive
Inula britannica		original	Not exotic and harmful
Ipomoea aquatica		original	Invasive
Ipomoea purpurea		original	Exotic
Ipomoea tricolor		original	Exotic
Iris pseudacorus		original	Invasive
Isatis tinctoria		original	Exotic
Senecio jacobaea ssp. jacobaea	Senecio jacobaea	Synonym	Invasive
Juglans nigra		original	Exotic
Juncus bufonius		original	Exotic
Juncus compressus		original	Exotic
Juncus ensifolius		original	Exotic
Juncus inflexus		original	Exotic
Juncus tenuis		original	Invasive
Juniperus virginiana		original	Exotic
Koeleria macrantha		original	Exotic
Kummerowia stipulacea		original	Not exotic and harmful
Lactuca sativa		original	Exotic
Lactuca serriola		original	Exotic
Lamium amplexicaule		original	Exotic
Lantana camara		original	Invasive
Lapsana communis		original	Not exotic and harmful
Lathyrus latifolius		original	Exotic
Leonurus cardiaca		original	Exotic
Lepidium densiflorum		original	Invasive
Lepidium draba		original	Exotic
Lepidium latifolium		original	Invasive
Lepidium perfoliatum		original	Exotic
Lepidium virginicum		original	Invasive
Leucaena leucocephala		original	Invasive
Leucanthemum vulgare		original	Exotic
Leymus arenarius		original	Exotic
Ligustrum lucidum		original	Invasive
Ligustrum ovalifolium		original	Invasive
Ligustrum sinense		original	Invasive
Ligustrum vulgare		original	Invasive
Linaria dalmatica		original	Not exotic and harmful
Linaria vulgaris		original	Invasive
Linnaea borealis		original	Exotic
Linum perenne		original	Exotic
Linum usitatissimum		original	Exotic
Lobularia maritima		original	Exotic
Lolium multiflorum		original	Exotic
Lolium perenne		original	Exotic
Lonicera involucrata		original	Exotic
Lonicera japonica		original	Invasive
Lonicera maackii		original	Invasive
Lonicera tatarica		original	Exotic
Lonicera morrowii		original	Not exotic and harmful
Lonicera xylosteum		original	Exotic
Lotus corniculatus		original	Invasive
Lupinus arboreus		original	Not exotic and harmful
Lupinus polyphyllus		original	Invasive
Luzula luzuloides		original	Exotic
Lycopus americanus	Lycopus europaeus	Misapplied	Exotic
Lycopus europaeus		original	Exotic
Lygodium japonicum		original	Invasive
Lysimachia nummularia		original	Exotic
Lysimachia vulgaris		original	Exotic
Lythrum hyssopifolia	Lythrum hyssopifolium	Unresolved	Exotic
Lythrum salicaria		original	Invasive
Maclura pomifera		original	Exotic
Smilacina stellata	Maianthemum stellatum	Accepted	Exotic
Malva neglecta		original	Exotic
Malva parviflora		original	Exotic
Marrubium vulgare		original	Exotic
Marsilea quadrifolia		original	Exotic
Medicago lupulina		original	Exotic
Medicago minima		original	Exotic
Medicago polymorpha		original	Exotic
Medicago sativa		original	Invasive
Melia azedarach		original	Invasive
Melilotus albus		original	Exotic
Melilotus parviflorus	Melilotus indicus	Accepted	Exotic
Melilotus officinalis		original	Exotic
Melilotus alba		original	Exotic
Mentha aquatica		original	Exotic
Mentha arvensis		original	Exotic
Mentha pulegium		original	Exotic
Mentha spicata		original	Exotic
Merremia tuberosa		original	Invasive
Mirabilis jalapa		original	Invasive
Miscanthus sacchariflorus		original	Exotic
Miscanthus sinensis		original	Invasive
Monarda didyma		original	Exotic
Moneses uniflora		original	Exotic
Morus alba		original	Exotic
Murdannia keisak		original	Exotic
Myoporum laetum		original	Exotic
Myosotis arvensis		original	Invasive
Myosotis palustris	Myosotis scorpioides	Accepted	Invasive
Myosotis sylvatica		original	Exotic
Myosoton aquaticum		original	Exotic
Myriophyllum spicatum		original	Invasive
Najas marina		original	Exotic
Narcissus pseudonarcissus		original	Invasive
Nasturtium officinale		original	Exotic
Nelumbo nucifera		original	Exotic
Nepeta cataria		original	Exotic
Nephrolepis cordifolia		original	Invasive
Nerium oleander		original	Exotic
Nicotiana glauca		original	Invasive
Nothoscordum gracile		original	Exotic
Nymphaea capensis		original	Exotic
Nymphaea lotus		original	Exotic
Nymphaea mexicana		original	Exotic
Nymphoides peltata		original	Invasive
Oenothera biennis		original	Invasive
Oenothera elata		original	Exotic
Olea europaea		original	Exotic
Ononis alopecuroides		original	Exotic
Onopordum acanthium		original	Invasive
Opuntia vulgaris	Opuntia ficus-indica	Accepted	Invasive
Opuntia ficus-indica		original	Invasive
Ornithogalum umbellatum		original	Exotic
Orthilia secunda		original	Exotic
Oryza sativa		original	Exotic
Oxalis corniculata		original	Exotic
Oxalis stricta		original	Invasive
Pachysandra terminalis		original	Exotic
Paederia foetida		original	Invasive
Panicum maximum	Urochloa maxima	Synonym	Invasive
Albizia lophantha		original	Exotic
Parkinsonia aculeata		original	Exotic
Parthenocissus quinquefolia		original	Exotic
Paspalum dilatatum		original	Invasive
Passiflora foetida		original	Invasive
Pastinaca sativa		original	Invasive
Paulownia tomentosa		original	Invasive
Peganum harmala		original	Exotic
Pennisetum purpureum		original	Exotic
Pennisetum setaceum		original	Invasive
Pennisetum villosum		original	Exotic
Perilla frutescens		original	Not exotic and harmful
Phalaris aquatica		original	Exotic
Phalaris canariensis	Phalaris aquatica	Synonym	Exotic
Phalaris minor		original	Exotic
Phellodendron amurense		original	Not exotic and harmful
Phellodendron japonicum		original	Not exotic and harmful
Phleum pratense		original	Exotic
Phlox paniculata		original	Exotic
Phoenix canariensis		original	Invasive
Phragmites australis		original	Invasive
Phyllanthus fluitans		original	Exotic
Phyllostachys aurea		original	Exotic
Phytolacca americana		original	Exotic
Picea abies		original	Exotic
Picea pungens		original	Exotic
Hieracium aurantiacum		original	Not exotic and harmful
Pinus contorta		original	Exotic
Pinus mugo	Pinus echinata	Synonym	Not exotic and harmful
Pinus ponderosa		original	Exotic
Pinus radiata		original	Not exotic and harmful
Pinus sylvestris		original	Exotic
Piptatherum miliaceum		original	Exotic
Pistacia atlantica		original	Exotic
Pistacia chinensis		original	Exotic
Pistia stratiotes		original	Invasive
Pittosporum undulatum		original	Exotic
Plantago coronopus		original	Exotic
Plantago lanceolata		original	Exotic
Plantago major		original	Exotic
Poa alpina		original	Exotic
Poa annua		original	Invasive
Poa bulbosa		original	Exotic
Poa compressa		original	Exotic
Poa nemoralis		original	Not exotic and harmful
Poa pratensis		original	Invasive
Poa trivialis ssp. trivialis	Poa trivialis	Accepted	Not exotic and harmful
Polygonum aviculare		original	Exotic
Polygonum perfoliatum		original	Invasive
Polypogon monspeliensis		original	Exotic
Pontederia cordata		original	Exotic
Populus alba		original	Invasive
Populus nigra		original	Exotic
Portulaca oleracea		original	Exotic
Potentilla argentea		original	Exotic
Potentilla norvegica	Potentilla rivalis	Synonym	Exotic
Potentilla pensylvanica		original	Exotic
Potentilla recta		original	Exotic
Prunus divaricata	Prunus cerasifera	Accepted	Exotic
Prunus serotina		original	Invasive
Prunus virginiana		original	Exotic
Pseudotsuga menziesii		original	Exotic
Pteris vittata		original	Exotic
Puccinellia distans		original	Exotic
Pyracantha angustifolia		original	Exotic
Pyracantha coccinea		original	Exotic
Pyracantha crenulata		original	Exotic
Quercus acutissima		original	Not exotic and harmful
Ranunculus acris		original	Not exotic and harmful
Ranunculus repens		original	Exotic
Ranunculus sceleratus		original	Exotic
Raphanus sativus		original	Exotic
Rapistrum rugosum		original	Exotic
Retama rhodorhizoides	Genista monosperma	Synonym	Exotic
Retama raetam	Genista monosperma	Synonym	Exotic
Reynoutria japonica	Fallopia japonica	Synonym	Exotic
Reynoutria sachalinensis	Fallopia sachalinensis	Unresolved	Exotic
Rhamnus cathartica		original	Invasive
Rhodotypos scandens		original	Not exotic and harmful
Ribes aureum		original	Exotic
Ricinus communis		original	Invasive
Robinia pseudacacia	Robinia pseudoacacia	Accepted	Invasive
Rorippa amphibia		original	Exotic
Rorippa palustris		original	Exotic
Rorippa sylvestris		original	Exotic
Rosa acicularis		original	Invasive
Rosa luciae var. fujisanensis	Rosa multiflora	Synonym	Invasive
Rosa multiflora		original	Invasive
Rosa rugosa		original	Invasive
Rubus allegheniensis		original	Exotic
Rubus idaeus		original	Exotic
Rubus occidentalis		original	Exotic
Rubus parviflorus		original	Exotic
Rubus phoenicolasius		original	Exotic
Rubus ulmifolius	Rubus discolor	Synonym	Exotic
Rudbeckia hirta		original	Exotic
Rudbeckia laciniata		original	Invasive
Rumex acetosa		original	Exotic
Rumex acetosella		original	Invasive
Rumex crispus		original	Exotic
Rumex longifolius		original	Exotic
Rumex obtusifolius		original	Invasive
Erianthus ravennae	Saccharum ravennae	Accepted	Exotic
Sagina procumbens		original	Invasive
Sagittaria montevidensis		original	Exotic
Salix alba		original	Invasive
Salsola kali		original	Exotic
Salsola soda		original	Exotic
Salvia aethiopis		original	Exotic
Salvinia molesta		original	Invasive
Salvinia minima		original	Invasive
Sambucus racemosa		original	Invasive
Sanguisorba minor		original	Exotic
Sapium sebiferum		original	Exotic
Saponaria officinalis		original	Exotic
Schefflera actinophylla		original	Invasive
Schinus molle		original	Exotic
Schinus terebinthifolius		original	Invasive
Schedonorus arundinaceus	Festuca arundinacea	Synonym	Exotic
Secale cereale		original	Exotic
Securigera varia		original	Not exotic and harmful
Sedum acre		original	Exotic
Senecio sylvaticus		original	Exotic
Senecio vulgaris		original	Exotic
Sesbania punicea		original	Exotic
Setaria faberi		original	Exotic
Setaria verticillata		original	Invasive
Setaria viridis		original	Exotic
Sidalcea oregana		original	Exotic
Melandrium noctiflorum	Silene noctiflora	Accepted	Exotic
Oberna behen	Silene vulgaris	Accepted	Exotic
Silphium perfoliatum		original	Exotic
Silybum marianum		original	Exotic
Sinapis arvensis		original	Exotic
Sisymbrium altissimum		original	Exotic
Sisymbrium irio		original	Exotic
Sisymbrium loeselii		original	Invasive
Sisymbrium officinale		original	Exotic
Sisyrinchium angustifolium		original	Exotic
Sisyrinchium arenarium	Sisyrinchium angustifolium	Synonym	Exotic
Sisyrinchium montanum		original	Exotic
Solanum nigrum		original	Exotic
Solanum dulcamara		original	Exotic
Solanum mauritianum		original	Invasive
Solanum triflorum		original	Exotic
Solanum viarum		original	Invasive
Solidago canadensis		original	Invasive
Solidago gigantea		original	Invasive
Solidago sempervirens		original	Exotic
Sonchus arvensis		original	Exotic
Sonchus asper		original	Invasive
Sonchus oleraceus		original	Exotic
Sorbaria sorbifolia		original	Not exotic and harmful
Sorghum bicolor var. bicolor	Sorghum bicolor	Accepted	Exotic
Sorghum halepense		original	Invasive
Spartium junceum		original	Exotic
Spiraea fritschiana	Spiraea japonica	Accepted	Invasive
Spiraea thunbergii	Spiraea japonica	Synonym	Invasive
Sporobolus vaginiflorus		original	Exotic
Stellaria aquatica	Myosoton aquaticum	Synonym	Exotic
Stellaria media		original	Invasive
Symphoricarpos albus		original	Exotic
Syringa vulgaris		original	Invasive
Syzygium cumini		original	Invasive
Syzygium jambos		original	Invasive
Taeniatherum caput-medusae		original	Exotic
Tamarix ramosissima		original	Invasive
Tanacetum vulgare var. crispum	Tanacetum vulgare	Accepted	Exotic
Taraxacum officinale		original	Invasive
Tecoma stans		original	Invasive
Tetragonia tetragonioides		original	Exotic
Thermopsis montana		original	Exotic
Thermopsis rhombifolia	Thermopsis montana	Synonym	Exotic
Thlaspi arvense		original	Exotic
Tilia americana		original	Exotic
Torilis arvensis		original	Exotic
Torilis japonica		original	Exotic
Toxicodendron radicans		original	Exotic
Tradescantia fluminensis		original	Invasive
Tradescantia spathacea		original	Invasive
Tragopogon dubius		original	Exotic
Tragopogon porrifolius		original	Exotic
Tragopogon pratensis		original	Exotic
Trapa natans		original	Invasive
Triadenum virginicum	Elodea canadensis	Synonym	Invasive
Tribulus terrestris		original	Exotic
Trifolium arvense		original	Exotic
Trifolium campestre		original	Exotic
Trifolium dubium		original	Exotic
Trifolium hybridum		original	Exotic
Trifolium pratense		original	Exotic
Trifolium repens		original	Exotic
Triticum aestivum		original	Exotic
Tropaeolum majus		original	Exotic
Tussilago farfara		original	Invasive
Typha angustifolia		original	Exotic
Typha domingensis		original	Exotic
Typha latifolia		original	Invasive
Ulex europaeus		original	Invasive
Ulmus pumila		original	Exotic
Urtica dioica		original	Exotic
Valeriana officinalis		original	Exotic
Verbascum blattaria		original	Exotic
Verbascum thapsus		original	Invasive
Verbena bonariensis		original	Exotic
Veronica anagallis-aquatica		original	Exotic
Veronica arvensis		original	Exotic
Veronica beccabunga		original	Exotic
Veronica officinalis		original	Not exotic and harmful
Veronica peregrina		original	Exotic
Veronica serpyllifolia		original	Exotic
Viburnum dilatatum		original	Not exotic and harmful
Viburnum lantana		original	Not exotic and harmful
Vicia cracca		original	Exotic
Vicia sativa ssp. sativa	Vicia sativa	Accepted	Exotic
Vicia villosa		original	Exotic
Vinca major		original	Invasive
Vinca minor		original	Invasive
Vincetoxicum hirundinaria	Cynanchum vincetoxicum	Synonym	Not exotic and harmful
Vincetoxicum nigrum		original	Exotic
Vincetoxicum rossicum	Cynanchum rossicum	Synonym	Exotic
Vitex rotundifolia		original	Invasive
Vulpia bromoides		original	Exotic
Vulpia myuros		original	Exotic
Washingtonia robusta		original	Exotic
Watsonia meriana		original	Exotic
Wisteria sinensis		original	Invasive
Xanthium strumarium		original	Exotic
Yucca filamentosa		original	Not exotic and harmful
Zizania aquatica		original	Invasive
