# Supplementary material for: Integrating Biodiversity Data into Botanic Collections
Source: Biodivers Data J. 2016 May 20;(4):e7971. doi: 10.3897/BDJ.4.e7971 (PMC4910503; doi:10.3897/BDJ.4.e7971)
Supplement: Supplementary material 7 — DAISIE exotic and invasive taxa [file biodiversity_data_journal-4-e7971-s007.csv]

Taxon	Type
Acacia dealbata	worst100
Ailanthus altissima	worst100
Ambrosia artemisiifolia	worst100
Cortaderia selloana	worst100
Echinocystis lobata	worst100
Hedychium gardnerianum	worst100
Heracleum mantegazzianum	worst100
Impatiens glandulifera	worst100
Opuntia ficus-indica	worst100
Prunus serotina	worst100
Rhododendron ponticum	worst100
Rosa rugosa	worst100
Abelia x grandiflora	alien
Abies alba	alien
Abies balsamea	alien
Abies cephalonica	alien
Abies nordmanniana	alien
Abies pinsapo	alien
Abies procera	alien
Abies sibirica	alien
Abronia fragrans	alien
Abutilon grandifolium	alien
Abutilon theophrasti	alien
Acacia cyclops	alien
Acacia decurrens	alien
Acacia farnesiana	alien
Acacia longifolia	alien
Acacia mearnsii	alien
Acacia melanoxylon	alien
Acacia saligna	alien
Acacia verticillata	alien
Acaena anserinifolia	alien
Acaena novae-zelandiae	alien
Acaena ovalifolia	alien
Acalypha virginica	alien
Acanthospermum hispidum	alien
Acanthus spinosus	alien
Acca sellowiana	alien
Acer campestre	alien
Acer cappadocicum	alien
Acer monspessulanum	alien
Acer negundo	alien
Acer palmatum	alien
Acer platanoides	alien
Acer pseudoplatanus	alien
Acer saccharinum	alien
Acer saccharum	alien
Acer tataricum	alien
Acer tegmentosum	alien
Achillea ageratum	alien
Achillea crithmifolia	alien
Achillea filipendulina	alien
Achillea grandifolia	alien
Achillea ligustica	alien
Achillea millefolium	alien
Achillea nobilis	alien
Achillea ptarmica	alien
Achillea distans	alien
Achillea setacea	alien
Achillea pannonica	alien
Achyranthes aspera	alien
Acinos arvensis	alien
Aconitum napellus	alien
Aconitum variegatum	alien
Acorus calamus	alien
Acorus gramineus	alien
Actinidia chinensis	alien
Adenostyles alliariae	alien
Adiantum capillus-veneris	alien
Adiantum hispidulum	alien
Adiantum raddianum	alien
Adonis aestivalis	alien
Adonis annua	alien
Adonis flammea	alien
Adoxa moschatellina	alien
Aegilops cylindrica	alien
Aegilops geniculata	alien
Aegilops speltoides	alien
Aegilops tauschii	alien
Aegilops triuncialis	alien
Aegilops ventricosa	alien
Aegopodium podagraria	alien
Aeonium arboreum	alien
Aeonium decorum	alien
Aeonium glutinosum	alien
Aeonium haworthii	alien
Aeonium simsii	alien
Aesculus flava	alien
Aesculus hippocastanum	alien
Aesculus indica	alien
Aesculus parviflora	alien
Aesculus pavia	alien
Aesculus x carnea	alien
Aethusa cynapium	alien
Agapanthus praecox	alien
Agave attenuata	alien
Ageratum conyzoides	alien
Ageratum houstonianum	alien
Agrimonia eupatoria	alien
Agrimonia procera	alien
Agropyron desertorum	alien
Agrostemma githago	alien
Agrostis capillaris	alien
Agrostis gigantea	alien
Agrostis stolonifera	alien
Aira caryophyllea	alien
Aira elegantissima	alien
Aizoon canariense	alien
Ajuga chamaepitys	alien
Ajuga genevensis	alien
Ajuga pyramidalis	alien
Ajuga reptans	alien
Akebia quinata	alien
Albizia julibrissin	alien
Alcea rosea	alien
Alcea setosa	alien
Alchemilla conjuncta	alien
Alchemilla glaucescens	alien
Alchemilla mollis	alien
Alchemilla monticola	alien
Alchemilla speciosa	alien
Alchemilla splendens	alien
Alchemilla vulgaris	alien
Alchemilla acutiloba	alien
Alisma lanceolatum	alien
Allamanda cathartica	alien
Alliaria petiolata	alien
Allium ampeloprasum	alien
Allium atropurpureum	alien
Allium carinatum	alien
Allium cepa	alien
Allium fistulosum	alien
Allium flavum	alien
Allium giganteum	alien
Allium moly	alien
Allium neapolitanum	alien
Allium nigrum	alien
Allium paradoxum	alien
Allium roseum	alien
Allium sativum	alien
Allium schoenoprasum	alien
Allium scorodoprasum	alien
Allium sphaerocephalon	alien
Allium subhirsutum	alien
Allium subvillosum	alien
Allium triquetrum	alien
Allium unifolium	alien
Allium ursinum	alien
Allium victorialis	alien
Allium vineale	alien
Allium odorum	alien
Allium angulosum	alien
Allium christophii	alien
Allium oleraceum	alien
Alnus viridis	alien
Alnus cordata	alien
Alnus glutinosa	alien
Alnus incana	alien
Alnus japonica	alien
Alnus rubra	alien
Aloe arborescens	alien
Aloe ciliaris	alien
Aloe ferox	alien
Aloe plicatilis	alien
Aloe variegata	alien
Aloe brevifolia	alien
Alopecurus aequalis	alien
Alopecurus geniculatus	alien
Alopecurus myosuroides	alien
Alopecurus pratensis	alien
Alopecurus rendlei	alien
Aloysia citrodora	alien
Alpinia zerumbet	alien
Alstroemeria aurea	alien
Althaea hirsuta	alien
Althaea armeniaca	alien
Althaea cannabina	alien
Althaea officinalis	alien
Alyssum alyssoides	alien
Alyssum montanum	alien
Alyssum simplex	alien
Alyssum argenteum	alien
Alyssum murale	alien
Amaranthus albus	alien
Amaranthus blitoides	alien
Amaranthus blitum	alien
Amaranthus caudatus	alien
Amaranthus deflexus	alien
Amaranthus graecizans	alien
Amaranthus hybridus	alien
Amaranthus powellii	alien
Amaranthus retroflexus	alien
Amaranthus spinosus	alien
Amaranthus tricolor	alien
Amaranthus bouchonii	alien
Amaranthus cruentus	alien
Amaranthus crispus	alien
Ambrosia trifida	alien
Amelanchier spicata	alien
Amelanchier alnifolia	alien
Amelanchier canadensis	alien
Amelanchier laevis	alien
Amelanchier ovalis	alien
Amelanchier lamarckii	alien
Ammannia coccinea	alien
Ammi majus	alien
Ammi visnaga	alien
Amorpha fruticosa	alien
Ampelodesmos mauritanicus	alien
Amsonia tabernaemontana	alien
Anacyclus clavatus	alien
Anacyclus radiatus	alien
Anagallis arvensis	alien
Anagallis foemina	alien
Anagallis monelli	alien
Anaphalis margaritacea	alien
Anarrhinum bellidifolium	alien
Anchusa azurea	alien
Anchusa arvensis	alien
Anchusa officinalis	alien
Anchusa ochroleuca	alien
Andropogon virginicus	alien
Androsace elongata	alien
Androsace filiformis	alien
Androsace maxima	alien
Anemone apennina	alien
Anemone coronaria	alien
Anemone dichotoma	alien
Anemone hupehensis	alien
Anemone nemorosa	alien
Anemone sylvestris	alien
Anemone tomentosa	alien
Anemonella thalictroides	alien
Anethum graveolens	alien
Angelica archangelica	alien
Angelica pachycarpa	alien
Annona cherimola	alien
Anoda cristata	alien
Anthemis austriaca	alien
Anthemis segetalis	alien
Anthemis arvensis	alien
Anthemis cotula	alien
Anthemis tinctoria	alien
Anthemis ruthenica	alien
Anthemis triumfettii	alien
Anthemis altissima	alien
Anthericum liliago	alien
Anthoxanthum aristatum	alien
Anthoxanthum odoratum	alien
Anthriscus caucalis	alien
Anthriscus cerefolium	alien
Anthriscus sylvestris	alien
Anthyllis vulneraria	alien
Antigonon leptopus	alien
Antirrhinum majus	alien
Antirrhinum siculum	alien
Apera interrupta	alien
Apera spica-venti	alien
Aphanes arvensis	alien
Apium graveolens	alien
Apocynum cannabinum	alien
Aposeris foetida	alien
Aptenia cordifolia	alien
Aptenia lancifolia	alien
Aquilegia atrata	alien
Aquilegia pyrenaica	alien
Aquilegia vulgaris	alien
Arabidopsis thaliana	alien
Arabis alpina	alien
Arabis caucasica	alien
Arabis auriculata	alien
Arabis procurrens	alien
Arabis turrita	alien
Arachis hypogaea	alien
Aralia chinensis	alien
Aralia elata	alien
Aralia racemosa	alien
Aralia spinosa	alien
Araucaria araucana	alien
Araucaria bidwillii	alien
Araucaria heterophylla	alien
Araujia sericifera	alien
Arbutus andrachne	alien
Arbutus unedo	alien
Archontophoenix cunninghamiana	alien
Arctium lappa	alien
Arctium minus	alien
Arctium tomentosum	alien
Arctotheca calendula	alien
Arctotis stoechadifolia	alien
Arctotis venusta	alien
Arenaria serpyllifolia	alien
Argemone mexicana	alien
Argyranthemum frutescens	alien
Argyranthemum pinnatifidum	alien
Aristea ecklonii	alien
Aristolochia clematitis	alien
Aristolochia macrophylla	alien
Aristolochia sempervirens	alien
Armeria arenaria	alien
Armoracia rusticana	alien
Arnica chamissonis	alien
Arnica montana	alien
Arnoseris minima	alien
Aronia arbutifolia	alien
Aronia melanocarpa	alien
Arrhenatherum elatius	alien
Artemisia abrotanum	alien
Artemisia absinthium	alien
Artemisia alba	alien
Artemisia annua	alien
Artemisia arborescens	alien
Artemisia austriaca	alien
Artemisia biennis	alien
Artemisia campestris	alien
Artemisia dracunculus	alien
Artemisia pontica	alien
Artemisia scoparia	alien
Artemisia verlotiorum	alien
Artemisia vulgaris	alien
Arum italicum	alien
Arum maculatum	alien
Arundo donax	alien
Asarina procumbens	alien
Asarum europaeum	alien
Asclepias curassavica	alien
Asclepias syriaca	alien
Asparagus aethiopicus	alien
Asparagus asparagoides	alien
Asparagus densiflorus	alien
Asparagus officinalis	alien
Asperugo procumbens	alien
Asperula arvensis	alien
Asperula orientalis	alien
Asperula tinctoria	alien
Asphodelus albus	alien
Asphodelus fistulosus	alien
Aster dumosus	alien
Aster amellus	alien
Aster sibiricus	alien
Aster squamatus	alien
Aster macrophyllus	alien
Aster novae-angliae	alien
Aster novi-belgii	alien
Aster bellidiastrum	alien
Aster divaricatus	alien
Aster laevis	alien
Asterolinon linum-stellatum	alien
Astilbe japonica	alien
Astilbe x arendsii	alien
Astragalus alopecuroides	alien
Astragalus cicer	alien
Astragalus falcatus	alien
Astragalus galegiformis	alien
Astragalus glycyphyllos	alien
Astragalus hamosus	alien
Astragalus onobrychis	alien
Astragalus penduliflorus	alien
Astrantia major	alien
Astrodaucus orientalis	alien
Athamanta sicula	alien
Athanasia trifurcata	alien
Atriplex aucheri	alien
Atriplex halimus	alien
Atriplex hortensis	alien
Atriplex laciniata	alien
Atriplex littoralis	alien
Atriplex micrantha	alien
Atriplex nummularia	alien
Atriplex oblongifolia	alien
Atriplex patula	alien
Atriplex rosea	alien
Atriplex semibaccata	alien
Atriplex tatarica	alien
Atriplex prostrata	alien
Aubrieta deltoidea	alien
Aubrieta x cultorum	alien
Aucuba japonica	alien
Aurinia petraea	alien
Aurinia saxatilis	alien
Austrocylindropuntia subulata	alien
Avena barbata	alien
Avena brevis	alien
Avena byzantina	alien
Avena fatua	alien
Avena nuda	alien
Avena sativa	alien
Avena sterilis	alien
Avena strigosa	alien
Avenula bromoides	alien
Axyris amaranthoides	alien
Azolla filiculoides	alien
Baccharis halimifolia	alien
Baldellia ranunculoides	alien
Ballota acetabulosa	alien
Ballota hirsuta	alien
Ballota nigra	alien
Ballota pseudodictamnus	alien
Balsamita major	alien
Barbarea intermedia	alien
Barbarea stricta	alien
Barbarea verna	alien
Barbarea vulgaris	alien
Basella alba	alien
Bassia hyssopifolia	alien
Bassia prostrata	alien
Bauhinia acuminata	alien
Bauhinia variegata	alien
Beckmannia eruciformis	alien
Begonia semperflorens	alien
Begonia foliosa	alien
Bellevalia romana	alien
Bellevalia trifoliata	alien
Bellis perennis	alien
Bencomia caudata	alien
Berberis aggregata	alien
Berberis darwinii	alien
Berberis gagnepainii	alien
Berberis julianae	alien
Berberis thunbergii	alien
Berberis vulgaris	alien
Berberis buxifolia	alien
Berberis x ottawensis	alien
Bergenia crassifolia	alien
Berteroa incana	alien
Beta trigyna	alien
Beta vulgaris	alien
Betula nana	alien
Betula pendula	alien
Betula pubescens	alien
Bidens bipinnata	alien
Bidens connata	alien
Bidens ferulifolia	alien
Bidens frondosa	alien
Bidens pilosa	alien
Bidens tripartita	alien
Bifora radians	alien
Biscutella auriculata	alien
Biscutella didyma	alien
Biserrula pelecinus	alien
Blackstonia perfoliata	alien
Blechnum occidentale	alien
Blechnum spicant	alien
Bletilla striata	alien
Blumenbachia hieronymi	alien
Blumenbachia insignis	alien
Boehmeria nivea	alien
Boltonia asteroides	alien
Borago officinalis	alien
Borago pygmaea	alien
Bothriochloa ischaemum	alien
Bowlesia incana	alien
Brachiaria mutica	alien
Brachychiton acerifolius	alien
Brachychiton populneus	alien
Brachypodium distachyon	alien
Brahea armata	alien
Brassica elongata	alien
Brassica juncea	alien
Brassica nigra	alien
Brassica oleracea	alien
Brassica tournefortii	alien
Briza maxima	alien
Briza media	alien
Briza minor	alien
Bromus arvensis	alien
Bromus brevis	alien
Bromus briziformis	alien
Bromus catharticus	alien
Bromus commutatus	alien
Bromus diandrus	alien
Bromus erectus	alien
Bromus grossus	alien
Bromus hordeaceus	alien
Bromus japonicus	alien
Bromus madritensis	alien
Bromus racemosus	alien
Bromus rigidus	alien
Bromus rubens	alien
Bromus secalinus	alien
Bromus squarrosus	alien
Bromus sterilis	alien
Bromus tectorum	alien
Broussonetia papyrifera	alien
Brugmansia suaveolens	alien
Brunnera macrophylla	alien
Bryonia alba	alien
Bryonia dioica	alien
Bryophyllum fedtschenkoi	alien
Buddleja alternifolia	alien
Buddleja davidii	alien
Buddleja globosa	alien
Buddleja japonica	alien
Bunias erucago	alien
Bunias orientalis	alien
Bunium bulbocastanum	alien
Bupleurum longifolium	alien
Bupleurum falcatum	alien
Bupleurum fruticosum	alien
Bupleurum praealtum	alien
Bupleurum rotundifolium	alien
Bupleurum baldense	alien
Butomus umbellatus	alien
Buxus sempervirens	alien
Caesalpinia gilliesii	alien
Caesalpinia spinosa	alien
Cakile maritima	alien
Calamagrostis arundinacea	alien
Calamintha grandiflora	alien
Calamintha nepeta	alien
Calamintha sylvatica	alien
Calandrinia compressa	alien
Calceolaria pinnata	alien
Calendula arvensis	alien
Calendula officinalis	alien
Calendula stellata	alien
Calendula suffruticosa	alien
Calepina irregularis	alien
Calla palustris	alien
Callistemon citrinus	alien
Callistemon rigidus	alien
Callistemon viminalis	alien
Calluna vulgaris	alien
Calocedrus decurrens	alien
Calycanthus floridus	alien
Camelina microcarpa	alien
Camelina sativa	alien
Camellia japonica	alien
Campanula carpatica	alien
Campanula erinus	alien
Campanula fenestrellata	alien
Campanula glomerata	alien
Campanula lactiflora	alien
Campanula latifolia	alien
Campanula patula	alien
Campanula persicifolia	alien
Campanula portenschlagiana	alien
Campanula poscharskyana	alien
Campanula rapunculoides	alien
Campanula rapunculus	alien
Campanula rhomboidalis	alien
Canna flaccida	alien
Canna x generalis	alien
Cannabis sativa	alien
Capparis spinosa	alien
Capsella bursa-pastoris	alien
Capsella rubella	alien
Caragana arborescens	alien
Caragana frutex	alien
Cardamine bulbifera	alien
Cardamine chelidonia	alien
Cardamine heptaphylla	alien
Cardamine hirsuta	alien
Cardamine impatiens	alien
Cardamine pratensis	alien
Cardamine trifolia	alien
Cardaminopsis arenosa	alien
Cardaminopsis halleri	alien
Cardiospermum halicacabum	alien
Carduus acanthoides	alien
Carduus hamulosus	alien
Carduus nutans	alien
Carduus tenuiflorus	alien
Carduus crispus	alien
Carex ovalis	alien
Carex acuta	alien
Carex bohemica	alien
Carex buchananii	alien
Carex hirta	alien
Carex intumescens	alien
Carex macloviana	alien
Carex morrowii	alien
Carex muskingumensis	alien
Carex pendula	alien
Carex vulpina	alien
Carex vulpinoidea	alien
Carex panicea	alien
Carica papaya	alien
Carlina acaulis	alien
Carlina vulgaris	alien
Carpesium cernuum	alien
Carpinus betulus	alien
Carrichtera annua	alien
Carthamus lanatus	alien
Carthamus tinctorius	alien
Carum carvi	alien
Carya cordiformis	alien
Carya ovata	alien
Caryopteris x clandonensis	alien
Castanea crenata	alien
Castanea sativa	alien
Casuarina cunninghamiana	alien
Catalpa bignonioides	alien
Catalpa ovata	alien
Catalpa speciosa	alien
Catananche caerulea	alien
Catananche lutea	alien
Catapodium rigidum	alien
Catharanthus roseus	alien
Caucalis platycarpos	alien
Ceanothus x delilianus	alien
Cedronella canariensis	alien
Cedrus atlantica	alien
Cedrus deodara	alien
Celastrus orbiculatus	alien
Celastrus scandens	alien
Celosia argentea	alien
Celtis caucasica	alien
Celtis australis	alien
Celtis occidentalis	alien
Centaurea aspera	alien
Centaurea calcitrapa	alien
Centaurea diffusa	alien
Centaurea diluta	alien
Centaurea jacea	alien
Centaurea melitensis	alien
Centaurea nigra	alien
Centaurea nigrescens	alien
Centaurea orientalis	alien
Centaurea paniculata	alien
Centaurea pectinata	alien
Centaurea phrygia	alien
Centaurea pullata	alien
Centaurea scabiosa	alien
Centaurea solstitialis	alien
Centaurea cyanus	alien
Centaurea pannonica	alien
Centaurea sonchifolia	alien
Centaurea dealbata	alien
Centaurea biebersteinii	alien
Centaurea stoebe	alien
Centaurea ruthenica	alien
Centaurea montana	alien
Centaurea triumfetti	alien
Centaurium erythraea	alien
Centaurium pulchellum	alien
Centaurium tenuiflorum	alien
Centranthus macrosiphon	alien
Centranthus ruber	alien
Cephalaria alpina	alien
Cephalaria radiata	alien
Cephalaria syriaca	alien
Cephalaria transsylvanica	alien
Cephalaria gigantea	alien
Cephalotaxus fortunei	alien
Cerastium arvense	alien
Cerastium biebersteinii	alien
Cerastium brachypetalum	alien
Cerastium fontanum	alien
Cerastium glomeratum	alien
Cerastium pumilum	alien
Cerastium tomentosum	alien
Ceratocapnos claviculata	alien
Ceratocarpus arenarius	alien
Ceratonia siliqua	alien
Ceratophyllum demersum	alien
Ceratophyllum submersum	alien
Ceratopteris thalictroides	alien
Ceratostigma plumbaginoides	alien
Cercis siliquastrum	alien
Cereus peruvianus	alien
Cerinthe major	alien
Cerinthe minor	alien
Cestrum nocturnum	alien
Cestrum parqui	alien
Chaenomeles speciosa	alien
Chaerophyllum aromaticum	alien
Chaerophyllum aureum	alien
Chaerophyllum bulbosum	alien
Chaerophyllum hirsutum	alien
Chamaecyparis lawsoniana	alien
Chamaecyparis pisifera	alien
Chamaecyparis thyoides	alien
Chamaecyparis nootkatensis	alien
Chamaecytisus purpureus	alien
Chamaecytisus ratisbonensis	alien
Chamaedorea elegans	alien
Chamaemelum nobile	alien
Chamaerops humilis	alien
Chamaesyce humifusa	alien
Chamaesyce prostrata	alien
Chambeyronia macrocarpa	alien
Chartolepis glastifolia	alien
Chasmanthe bicolor	alien
Chasmanthe floribunda	alien
Chasmanthe aethiopica	alien
Chasmanthium latifolium	alien
Cheirolophus intybaceus	alien
Chelidonium majus	alien
Chelone glabra	alien
Chenopodium album	alien
Chenopodium ficifolium	alien
Chenopodium foliosum	alien
Chenopodium glaucum	alien
Chenopodium murale	alien
Chenopodium opulifolium	alien
Chenopodium polyspermum	alien
Chenopodium quinoa	alien
Chenopodium rubrum	alien
Chenopodium strictum	alien
Chenopodium vulvaria	alien
Chenopodium bonus-henricus	alien
Chenopodium botrys	alien
Chenopodium capitatum	alien
Chenopodium hybridum	alien
Chenopodium ambrosioides	alien
Chenopodium schraderianum	alien
Chenopodium urbicum	alien
Chionodoxa forbesii	alien
Chloris barbata	alien
Chloris radiata	alien
Chlorophytum comosum	alien
Chondrilla juncea	alien
Chorisia speciosa	alien
Chrysanthemum indicum	alien
Chrysanthemum segetum	alien
Cicer arietinum	alien
Cicerbita alpina	alien
Cicerbita bourgaei	alien
Cicerbita macrophylla	alien
Cicerbita plumieri	alien
Cichorium endivia	alien
Cichorium intybus	alien
Cinnamomum glanduliferum	alien
Cirsium arvense	alien
Cirsium dissectum	alien
Cirsium erisithales	alien
Cirsium helenioides	alien
Cirsium heterophyllum	alien
Cirsium oleraceum	alien
Cirsium palustre	alien
Cirsium rivulare	alien
Cirsium tuberosum	alien
Cirsium vulgare	alien
Cirsium canum	alien
Cistus albidus	alien
Cistus laurifolius	alien
Cistus monspeliensis	alien
Cistus salviifolius	alien
Cistus psilosepalus	alien
Citrullus colocynthis	alien
Citrus limon	alien
Citrus reticulata	alien
Citrus sinensis	alien
Citrus x aurantium	alien
Clarkia pulchella	alien
Clarkia purpurea	alien
Clarkia unguiculata	alien
Claytonia perfoliata	alien
Clematis flammula	alien
Clematis integrifolia	alien
Clematis montana	alien
Clematis orientalis	alien
Clematis recta	alien
Clematis serratifolia	alien
Clematis vitalba	alien
Clematis viticella	alien
Clematis x jackmanii	alien
Cleome hassleriana	alien
Cleome spinosa	alien
Cleome violacea	alien
Clerodendrum trichotomum	alien
Clethra alnifolia	alien
Clinopodium vulgare	alien
Clivia miniata	alien
Clivia nobilis	alien
Clypeola jonthlaspi	alien
Cnidium silaifolium	alien
Cochlearia officinalis	alien
Coffea arabica	alien
Coix lacryma-jobi	alien
Colchicum autumnale	alien
Coleostephus myconis	alien
Colletia hystrix	alien
Collinsia heterophylla	alien
Collomia grandiflora	alien
Collomia linearis	alien
Colutea arborescens	alien
Colutea orientalis	alien
Colutea x media	alien
Commelina benghalensis	alien
Commelina coelestis	alien
Commelina communis	alien
Commelina virginica	alien
Conium maculatum	alien
Conopodium majus	alien
Conringia orientalis	alien
Consolida ajacis	alien
Consolida regalis	alien
Convallaria majalis	alien
Convolvulus arvensis	alien
Convolvulus elegantissimus	alien
Convolvulus farinosus	alien
Convolvulus persicus	alien
Convolvulus tricolor	alien
Conyza canadensis	alien
Corchorus olitorius	alien
Cordia myxa	alien
Cordyline australis	alien
Corema album	alien
Coreopsis grandiflora	alien
Coreopsis lanceolata	alien
Coreopsis verticillata	alien
Coriandrum sativum	alien
Coriaria myrtifolia	alien
Corispermum pallasii	alien
Corispermum leptopterum	alien
Cornus alba	alien
Cornus mas	alien
Cornus sanguinea	alien
Cornus sericea	alien
Cornus capitata	alien
Coronilla scorpioides	alien
Coronilla valentina	alien
Coronopus didymus	alien
Coronopus squamatus	alien
Corrigiola litoralis	alien
Cortaderia richardii	alien
Corydalis sempervirens	alien
Corydalis cava	alien
Corydalis cheilanthifolia	alien
Corydalis solida	alien
Corylus avellana	alien
Corylus colurna	alien
Corylus maxima	alien
Cosmos bipinnatus	alien
Cotinus coggygria	alien
Cotoneaster acuminatus	alien
Cotoneaster acutifolius	alien
Cotoneaster adpressus	alien
Cotoneaster affinis	alien
Cotoneaster apiculatus	alien
Cotoneaster astrophoros	alien
Cotoneaster bullatus	alien
Cotoneaster cashmiriensis	alien
Cotoneaster conspicuus	alien
Cotoneaster coriaceus	alien
Cotoneaster dammeri	alien
Cotoneaster dielsianus	alien
Cotoneaster divaricatus	alien
Cotoneaster fangianus	alien
Cotoneaster franchetii	alien
Cotoneaster frigidus	alien
Cotoneaster horizontalis	alien
Cotoneaster ignotus	alien
Cotoneaster integerrimus	alien
Cotoneaster melanocarpus	alien
Cotoneaster atropurpureus	alien
Cotoneaster boisianus	alien
Cotoneaster moupinensis	alien
Cotoneaster multiflorus	alien
Cotoneaster nebrodensis	alien
Cotoneaster nitens	alien
Cotoneaster nitidus	alien
Cotoneaster obscurus	alien
Cotoneaster pannosus	alien
Cotoneaster cochleatus	alien
Cotoneaster cooperi	alien
Cotoneaster rotundifolius	alien
Cotoneaster salicifolius	alien
Cotoneaster sherriffii	alien
Cotoneaster hsingshangensis	alien
Cotoneaster hummelii	alien
Cotoneaster hylmoei	alien
Cotoneaster insculptus	alien
Cotoneaster integrifolius	alien
Cotoneaster wardii	alien
Cotoneaster zabelii	alien
Cotoneaster lacteus	alien
Cotoneaster laetevirens	alien
Cotoneaster lucidus	alien
Cotoneaster mairei	alien
Cotoneaster marginatus	alien
Cotoneaster monopyrenus	alien
Cotoneaster mucronatus	alien
Cotoneaster przewalskii	alien
Cotoneaster pseudoambiguus	alien
Cotoneaster rehderi	alien
Cotoneaster splendens	alien
Cotoneaster tengyuehensis	alien
Cotoneaster vilmorinianus	alien
Cotoneaster amoenus	alien
Cotoneaster ascendens	alien
Cotoneaster congestus	alien
Cotoneaster ellipticus	alien
Cotoneaster henryanus	alien
Cotoneaster hissaricus	alien
Cotoneaster microphyllus	alien
Cotoneaster obtusus	alien
Cotoneaster prostratus	alien
Cotoneaster roseus	alien
Cotoneaster sternianus	alien
Cotoneaster tomentellus	alien
Cotoneaster villosulus	alien
Cotoneaster x watereri	alien
Cotoneaster hjelmqvistii	alien
Cotoneaster nanshan	alien
Cotoneaster x suecicus	alien
Cotoneaster transens	alien
Cotula coronopifolia	alien
Cotyledon orbiculata	alien
Crambe cordifolia	alien
Crambe maritima	alien
Crambe abyssinica	alien
Crassocephalum crepidioides	alien
Crassula arborescens	alien
Crassula multicava	alien
Crassula rupestris	alien
Crassula tetragona	alien
Crassula tillaea	alien
Crassula lycopodioides	alien
Crataegus azarolus	alien
Crataegus coccinioides	alien
Crataegus crus-galli	alien
Crataegus dahurica	alien
Crataegus douglasii	alien
Crataegus flabellata	alien
Crataegus laevigata	alien
Crataegus mollis	alien
Crataegus monogyna	alien
Crataegus orientalis	alien
Crataegus pedicellata	alien
Crataegus pentagyna	alien
Crataegus sanguinea	alien
Crataegus sinaica	alien
Crataegus submollis	alien
Crataegus succulenta	alien
Crepis biennis	alien
Crepis tectorum	alien
Crepis aurea	alien
Crepis capillaris	alien
Crepis foetida	alien
Crepis nicaeensis	alien
Crepis pulchra	alien
Crepis sancta	alien
Crepis setosa	alien
Crepis vesicaria	alien
Crepis zacintha	alien
Crocosmia x crocosmiiflora	alien
Crocosmia masoniorum	alien
Crocus flavus	alien
Crocus pulchellus	alien
Crocus sativus	alien
Crocus speciosus	alien
Crocus tommasinianus	alien
Crucianella angustifolia	alien
Crucianella latifolia	alien
Cruciata glabra	alien
Cruciata laevipes	alien
Cryptomeria japonica	alien
Cryptotaenia canadensis	alien
Cucumis melo	alien
Cucumis myriocarpus	alien
Cucumis sativus	alien
Cucurbita ficifolia	alien
Cucurbita maxima	alien
Cucurbita moschata	alien
Cucurbita pepo	alien
Cuminum cyminum	alien
Cuphea lanceolata	alien
Cuphea viscosissima	alien
Cupressus lusitanica	alien
Cupressus macrocarpa	alien
Cupressus sempervirens	alien
Cuscuta epilinum	alien
Cuscuta epithymum	alien
Cuscuta europaea	alien
Cuscuta lupuliformis	alien
Cuscuta campestris	alien
Cycas circinalis	alien
Cycas revoluta	alien
Cyclamen coum	alien
Cyclamen hederifolium	alien
Cyclamen persicum	alien
Cyclamen creticum	alien
Cyclanthera pedata	alien
Cydonia oblonga	alien
Cymbalaria muralis	alien
Cymbalaria pallida	alien
Cynara cardunculus	alien
Cynara scolymus	alien
Cynodon dactylon	alien
Cynoglossum creticum	alien
Cynoglossum officinale	alien
Cynosurus cristatus	alien
Cynosurus echinatus	alien
Cyperus alternifolius	alien
Cyperus eragrostis	alien
Cyperus esculentus	alien
Cyperus fuscus	alien
Cyperus longus	alien
Cyperus michelianus	alien
Cyperus papyrus	alien
Cyperus textilis	alien
Cyphomandra betacea	alien
Cyrtomium falcatum	alien
Cyrtomium fortunei	alien
Cystopteris bulbifera	alien
Cytisus multiflorus	alien
Cytisus striatus	alien
Dactylis glomerata	alien
Dahlia coccinea	alien
Danae racemosa	alien
Danthonia decumbens	alien
Daphne laureola	alien
Darmera peltata	alien
Dasypyrum villosum	alien
Datisca cannabina	alien
Datura ferox	alien
Datura metel	alien
Datura quercifolia	alien
Datura wrightii	alien
Daucus muricatus	alien
Delonix regia	alien
Delosperma cooperi	alien
Delphinium elatum	alien
Delphinium x cultorum	alien
Deschampsia cespitosa	alien
Descurainia pinnata	alien
Descurainia sophia	alien
Desmanthus illinoensis	alien
Deutzia scabra	alien
Dianthus armeria	alien
Dianthus barbatus	alien
Dianthus campestris	alien
Dianthus carthusianorum	alien
Dianthus caryophyllus	alien
Dianthus cruentus	alien
Dianthus deltoides	alien
Dianthus giganteus	alien
Dianthus gratianopolitanus	alien
Dianthus plumarius	alien
Dianthus subacaulis	alien
Dianthus superbus	alien
Diascia barberae	alien
Dicentra formosa	alien
Dicentra spectabilis	alien
Dichorisandra thyrsiflora	alien
Dicksonia antarctica	alien
Diervilla lonicera	alien
Digitalis ferruginea	alien
Digitalis grandiflora	alien
Digitalis lanata	alien
Digitalis lutea	alien
Digitalis purpurea	alien
Digitaria ischaemum	alien
Digitaria sanguinalis	alien
Diospyros kaki	alien
Diospyros lotus	alien
Diospyros virginiana	alien
Diplazium esculentum	alien
Diplotaxis erucoides	alien
Diplotaxis muralis	alien
Diplotaxis tenuifolia	alien
Diplotaxis viminea	alien
Diplotaxis virgata	alien
Dipsacus fullonum	alien
Dipsacus laciniatus	alien
Dipsacus sativus	alien
Distichoselinum tenuifolium	alien
Dittrichia viscosa	alien
Dodonaea viscosa	alien
Doronicum columnae	alien
Doronicum orientale	alien
Doronicum pardalianches	alien
Doronicum plantagineum	alien
Doryanthes palmeri	alien
Dorycnium hirsutum	alien
Downingia elegans	alien
Draba aizoides	alien
Draba muralis	alien
Draba sibirica	alien
Dracaena draco	alien
Dracocephalum ruyschiana	alien
Dracocephalum moldavica	alien
Dracunculus vulgaris	alien
Drosera capensis	alien
Dryopteris oreades	alien
Duchesnea indica	alien
Ecballium elaterium	alien
Echinaria capitata	alien
Echinochloa crus-galli	alien
Echinochloa esculenta	alien
Echinochloa frumentacea	alien
Echinops exaltatus	alien
Echinops ritro	alien
Echinops banaticus	alien
Echium candicans	alien
Echium italicum	alien
Echium pininana	alien
Echium plantagineum	alien
Echium vulgare	alien
Eclipta prostrata	alien
Elaeagnus angustifolia	alien
Elaeagnus commutata	alien
Elaeagnus multiflora	alien
Elaeagnus pungens	alien
Elaeagnus umbellata	alien
Elatine alsinastrum	alien
Eleusine coracana	alien
Eleusine indica	alien
Eleusine tristachya	alien
Elodea canadensis	alien
Elsholtzia ciliata	alien
Elymus dahuricus	alien
Elymus sibiricus	alien
Elymus elongatus	alien
Elymus athericus	alien
Elytrigia intermedia	alien
Emex spinosa	alien
Encephalartos lehmannii	alien
Enchylaena tomentosa	alien
Ensete ventricosum	alien
Ephedra altissima	alien
Ephedra distachya	alien
Epilobium brachycarpum	alien
Epilobium ciliatum	alien
Epilobium dodonaei	alien
Epilobium hirsutum	alien
Epilobium komarovianum	alien
Epilobium obscurum	alien
Epilobium parviflorum	alien
Epilobium roseum	alien
Epilobium tetragonum	alien
Equisetum arvense	alien
Equisetum palustre	alien
Equisetum ramosissimum	alien
Equisetum variegatum	alien
Eragrostis bahiensis	alien
Eragrostis cilianensis	alien
Eragrostis curvula	alien
Eragrostis japonica	alien
Eragrostis lugens	alien
Eragrostis mexicana	alien
Eragrostis minor	alien
Eragrostis obtusa	alien
Eragrostis pilosa	alien
Eragrostis plana	alien
Eragrostis rotifer	alien
Eragrostis tef	alien
Eragrostis albensis	alien
Eranthis hyemalis	alien
Eremopyrum triticeum	alien
Erica arborea	alien
Erica ciliaris	alien
Erica cinerea	alien
Erica carnea	alien
Erica lusitanica	alien
Erica scoparia	alien
Erica terminalis	alien
Erica tetralix	alien
Erica vagans	alien
Erigeron glaucus	alien
Erigeron karvinskianus	alien
Erigeron speciosus	alien
Erinus alpinus	alien
Eriobotrya japonica	alien
Eriocephalus africanus	alien
Eriophyllum lanatum	alien
Erodium botrys	alien
Erodium ciconium	alien
Erodium cicutarium	alien
Erodium malacoides	alien
Erodium gruinum	alien
Erodium moschatum	alien
Erodium manescavii	alien
Erophila verna	alien
Eruca vesicaria	alien
Erucastrum gallicum	alien
Erucastrum nasturtiifolium	alien
Eryngium amethystinum	alien
Eryngium campestre	alien
Eryngium giganteum	alien
Eryngium pandanifolium	alien
Eryngium planum	alien
Eryngium creticum	alien
Erysimum aureum	alien
Erysimum cheiranthoides	alien
Erysimum cheiri	alien
Erysimum cuspidatum	alien
Erysimum diffusum	alien
Erysimum hungaricum	alien
Erysimum marschallianum	alien
Erysimum perofskianum	alien
Erysimum repandum	alien
Erysimum x marshallii	alien
Erythrina crista-galli	alien
Erythronium dens-canis	alien
Escallonia bifida	alien
Escallonia rubra	alien
Eschscholzia californica	alien
Eucalyptus globulus	alien
Eucalyptus gunnii	alien
Eugenia uniflora	alien
Euonymus fortunei	alien
Euonymus latifolius	alien
Euonymus europaeus	alien
Euonymus nanus	alien
Eupatorium cannabinum	alien
Euphorbia virgata	alien
Euphorbia amygdaloides	alien
Euphorbia characias	alien
Euphorbia cyparissias	alien
Euphorbia dulcis	alien
Euphorbia esula	alien
Euphorbia exigua	alien
Euphorbia falcata	alien
Euphorbia helioscopia	alien
Euphorbia lathyris	alien
Euphorbia marginata	alien
Euphorbia milii	alien
Euphorbia myrsinites	alien
Euphorbia oblongata	alien
Euphorbia palustris	alien
Euphorbia peplus	alien
Euphorbia platyphyllos	alien
Euphorbia pulcherrima	alien
Euphorbia segetalis	alien
Euphorbia seguieriana	alien
Euphorbia trigona	alien
Euphorbia verrucosa	alien
Euphorbia serrulata	alien
Euphrasia nemorosa	alien
Euphrasia stricta	alien
Exochorda racemosa	alien
Fagopyrum esculentum	alien
Fagopyrum tataricum	alien
Fagus sylvatica	alien
Falcaria vulgaris	alien
Fallopia convolvulus	alien
Fallopia dumetorum	alien
Fallopia sachalinensis	alien
Fallopia baldschuanica	alien
Fatsia japonica	alien
Fedia cornucopiae	alien
Felicia tenella	alien
Ferula communis	alien
Ferulago sylvatica	alien
Ferulago campestris	alien
Festuca arundinacea	alien
Festuca filiformis	alien
Festuca gautieri	alien
Festuca heterophylla	alien
Festuca nigrescens	alien
Festuca pratensis	alien
Festuca rubra	alien
Festuca rupicaprina	alien
Festuca trachyphylla	alien
Festuca glauca	alien
Fibigia clypeata	alien
Ficus benjamina	alien
Ficus carica	alien
Ficus elastica	alien
Ficus pumila	alien
Ficus religiosa	alien
Ficus bengalensis	alien
Filago arvensis	alien
Filago lutescens	alien
Filago minima	alien
Filago pyramidata	alien
Filago vulgaris	alien
Filipendula rubra	alien
Filipendula vulgaris	alien
Filipendula kamtschatica	alien
Foeniculum vulgare	alien
Forsythia viridissima	alien
Forsythia x intermedia	alien
Forsythia suspensa	alien
Fragaria moschata	alien
Fragaria viridis	alien
Fraxinus americana	alien
Fraxinus angustifolia	alien
Fraxinus excelsior	alien
Fraxinus mandshurica	alien
Fraxinus ornus	alien
Fraxinus pennsylvanica	alien
Fritillaria imperialis	alien
Fritillaria meleagris	alien
Fritillaria persica	alien
Froelichia floridana	alien
Froelichia gracilis	alien
Fuchsia boliviana	alien
Fuchsia arborescens	alien
Fumaria muralis	alien
Fumaria parviflora	alien
Fumaria vaillantii	alien
Furcraea foetida	alien
Gagea lutea	alien
Gaillardia aristata	alien
Gaillardia pulchella	alien
Gaillardia x grandiflora	alien
Galactites tomentosa	alien
Galanthus nivalis	alien
Galanthus woronowii	alien
Galega officinalis	alien
Galega orientalis	alien
Galeopsis ladanum	alien
Galeopsis pubescens	alien
Galeopsis segetum	alien
Galeopsis speciosa	alien
Galeopsis tetrahit	alien
Galeopsis angustifolia	alien
Galinsoga parviflora	alien
Galinsoga quadriradiata	alien
Galium aparine	alien
Galium divaricatum	alien
Galium glaucum	alien
Galium mollugo	alien
Galium palustre	alien
Galium parisiense	alien
Galium pumilum	alien
Galium rotundifolium	alien
Galium rubioides	alien
Galium saxatile	alien
Galium spurium	alien
Galium sylvaticum	alien
Galium tricornutum	alien
Galium verum	alien
Gastridium ventricosum	alien
Gaudinia fragilis	alien
Gaultheria mucronata	alien
Gaultheria procumbens	alien
Gaultheria shallon	alien
Gaura biennis	alien
Gaura lindheimeri	alien
Gazania linearis	alien
Gazania rigens	alien
Genista aetnensis	alien
Genista hispanica	alien
Genista januensis	alien
Genista pilosa	alien
Genista tinctoria	alien
Gentiana acaulis	alien
Gentiana asclepiadea	alien
Gentiana clusii	alien
Gentiana lutea	alien
Gentiana septemfida	alien
Gentianella aurea	alien
Geranium bohemicum	alien
Geranium columbinum	alien
Geranium dissectum	alien
Geranium divaricatum	alien
Geranium endressii	alien
Geranium himalayense	alien
Geranium ibericum	alien
Geranium lucidum	alien
Geranium macrorrhizum	alien
Geranium maderense	alien
Geranium molle	alien
Geranium nepalense	alien
Geranium nodosum	alien
Geranium phaeum	alien
Geranium platypetalum	alien
Geranium pratense	alien
Geranium psilostemon	alien
Geranium purpureum	alien
Geranium pusillum	alien
Geranium pyrenaicum	alien
Geranium rotundifolium	alien
Geranium sanguineum	alien
Geranium sibiricum	alien
Geranium sylvaticum	alien
Geranium versicolor	alien
Geranium x magnificum	alien
Geranium x oxonianum	alien
Geum aleppicum	alien
Geum coccineum	alien
Geum quellyon	alien
Gilia capitata	alien
Gilia tricolor	alien
Ginkgo biloba	alien
Gladiolus communis	alien
Gladiolus illyricus	alien
Gladiolus imbricatus	alien
Gladiolus italicus	alien
Gladiolus palustris	alien
Glandularia canadensis	alien
Glaucium corniculatum	alien
Glaucium flavum	alien
Glechoma hederacea	alien
Gleditsia triacanthos	alien
Globularia punctata	alien
Glyceria fluitans	alien
Glyceria maxima	alien
Glycine max	alien
Glycyrrhiza echinata	alien
Glycyrrhiza glabra	alien
Gnaphalium undulatum	alien
Gnaphalium supinum	alien
Gnaphalium sylvaticum	alien
Gnaphalium uliginosum	alien
Gomphocarpus fruticosus	alien
Gomphrena globosa	alien
Goniolimon tataricum	alien
Gossypium arboreum	alien
Gossypium barbadense	alien
Gossypium herbaceum	alien
Gossypium hirsutum	alien
Graptopetalum paraguayense	alien
Gratiola officinalis	alien
Grevillea robusta	alien
Grindelia squarrosa	alien
Groenlandia densa	alien
Guizotia abyssinica	alien
Gunnera manicata	alien
Gypsophila acutifolia	alien
Gypsophila altissima	alien
Gypsophila elegans	alien
Gypsophila muralis	alien
Gypsophila paniculata	alien
Gypsophila perfoliata	alien
Gypsophila pilosa	alien
Gypsophila repens	alien
Gypsophila scorzonerifolia	alien
Hacquetia epipactis	alien
Halimione portulacoides	alien
Halimodendron halodendron	alien
Hamamelis mollis	alien
Hebe salicifolia	alien
Hebenstretia dentata	alien
Hedera colchica	alien
Hedera helix	alien
Hedychium flavescens	alien
Hedypnois cretica	alien
Hedysarum coronarium	alien
Helenium autumnale	alien
Helianthus annuus	alien
Helianthus giganteus	alien
Helianthus pauciflorus	alien
Helianthus salicifolius	alien
Helianthus tuberosus	alien
Helianthus decapetalus	alien
Helianthus x laetiflorus	alien
Helichrysum foetidum	alien
Helichrysum stoechas	alien
Helichrysum arenarium	alien
Helichrysum orientale	alien
Helichrysum bracteatum	alien
Heliopsis helianthoides	alien
Heliopsis scabra	alien
Heliotropium arborescens	alien
Heliotropium europaeum	alien
Helipterum strictum	alien
Helleborus foetidus	alien
Helleborus niger	alien
Helleborus odorus	alien
Helleborus orientalis	alien
Helleborus viridis	alien
Helleborus x hybridus	alien
Hemerocallis fulva	alien
Hemerocallis lilioasphodelus	alien
Hemerocallis yezoensis	alien
Hepatica nobilis	alien
Heracleum pubescens	alien
Heracleum sosnowskyi	alien
Heracleum sphondylium	alien
Heracleum persicum	alien
Herniaria glabra	alien
Herniaria hirsuta	alien
Hesperis matronalis	alien
Hesperis tristis	alien
Heteropogon contortus	alien
Heuchera americana	alien
Heuchera micrantha	alien
Heuchera sanguinea	alien
Hibiscus rosa-sinensis	alien
Hibiscus syriacus	alien
Hibiscus trionum	alien
Hieracium pulmonarioides	alien
Hieracium amplexicaule	alien
Hieracium pannosum	alien
Hieracium piloselloides	alien
Hippocrepis comosa	alien
Hippocrepis emerus	alien
Hippophae rhamnoides	alien
Hippuris vulgaris	alien
Hirschfeldia incana	alien
Holcus lanatus	alien
Holcus mollis	alien
Holmskioldia sanguinea	alien
Holodiscus discolor	alien
Holosteum umbellatum	alien
Hordeum bulbosum	alien
Hordeum distichon	alien
Hordeum jubatum	alien
Hordeum marinum	alien
Hordeum murinum	alien
Hordeum secalinum	alien
Hordeum vulgare	alien
Hornungia petraea	alien
Hosta plantaginea	alien
Hosta lancifolia	alien
Humulus lupulus	alien
Hunnemannia fumariifolia	alien
Hyacinthella leucophaea	alien
Hyacinthoides hispanica	alien
Hyacinthoides italica	alien
Hyacinthoides non-scripta	alien
Hyacinthus orientalis	alien
Hydrangea arborescens	alien
Hydrangea macrophylla	alien
Hydrocharis morsus-ranae	alien
Hydrocotyle verticillata	alien
Hydrophyllum virginianum	alien
Hylocereus undatus	alien
Hylomecon vernalis	alien
Hymenolobus procumbens	alien
Hyoscyamus albus	alien
Hyoscyamus niger	alien
Hyoscyamus pusillus	alien
Hyparrhenia hirta	alien
Hypericum androsaemum	alien
Hypericum atomarium	alien
Hypericum calycinum	alien
Hypericum hircinum	alien
Hypericum maculatum	alien
Hypericum perfoliatum	alien
Hypericum perforatum	alien
Hypericum pseudohenryi	alien
Hypericum pulchrum	alien
Hypericum triquetrifolium	alien
Hypericum xylosteifolium	alien
Hypericum x inodorum	alien
Hypochaeris achyrophorus	alien
Hypochaeris glabra	alien
Hypochaeris radicata	alien
Hypoestes phyllostachya	alien
Hyssopus officinalis	alien
Iberis amara	alien
Iberis pinnata	alien
Iberis semperflorens	alien
Iberis sempervirens	alien
Iberis umbellata	alien
Ibicella lutea	alien
Ilex aquifolium	alien
Illecebrum verticillatum	alien
Impatiens balfourii	alien
Impatiens balsamina	alien
Impatiens capensis	alien
Impatiens noli-tangere	alien
Impatiens parviflora	alien
Impatiens scabrida	alien
Impatiens walleriana	alien
Imperata cylindrica	alien
Indigofera heterantha	alien
Inula britannica	alien
Inula ensifolia	alien
Inula germanica	alien
Inula helenium	alien
Inula hirta	alien
Inula conyzae	alien
Inula spiraeifolia	alien
Iochroma australe	alien
Ipomoea batatas	alien
Ipomoea indica	alien
Ipomoea hederacea	alien
Ipomoea purpurea	alien
Ipomoea tricolor	alien
Ipomoea wrightii	alien
Iris albicans	alien
Iris foetidissima	alien
Iris germanica	alien
Iris graminea	alien
Iris japonica	alien
Iris lactea	alien
Iris latifolia	alien
Iris pallida	alien
Iris pseudacorus	alien
Iris pumila	alien
Iris setosa	alien
Iris sibirica	alien
Iris spuria	alien
Iris tectorum	alien
Iris unguicularis	alien
Iris variegata	alien
Iris versicolor	alien
Iris xiphium	alien
Isatis tinctoria	alien
Iva xanthiifolia	alien
Ixia maculata	alien
Jacaranda mimosifolia	alien
Jasione montana	alien
Jasminum fruticans	alien
Jasminum humile	alien
Jasminum nudiflorum	alien
Jasminum odoratissimum	alien
Jasminum officinale	alien
Jovibarba globifera	alien
Juglans ailanthifolia	alien
Juglans cinerea	alien
Juglans mandshurica	alien
Juglans nigra	alien
Juglans regia	alien
Juncus compressus	alien
Juncus conglomeratus	alien
Juncus ensifolius	alien
Juncus pygmaeus	alien
Juncus squarrosus	alien
Juncus tenuis	alien
Juncus bufonius	alien
Juncus hybridus	alien
Juncus gerardii	alien
Juniperus chinensis	alien
Juniperus sabina	alien
Juniperus virginiana	alien
Kalanchoe daigremontiana	alien
Kalanchoe longiflora	alien
Kalanchoe tubiflora	alien
Kalmia angustifolia	alien
Kalmia latifolia	alien
Kalmia polifolia	alien
Kickxia elatine	alien
Kickxia spuria	alien
Kigelia africana	alien
Knautia arvensis	alien
Knautia macedonica	alien
Kniphofia uvaria	alien
Koeleria macrantha	alien
Koeleria pyramidata	alien
Kundmannia sicula	alien
Lablab purpureus	alien
Laburnum alpinum	alien
Laburnum anagyroides	alien
Lactuca perennis	alien
Lactuca saligna	alien
Lactuca sativa	alien
Lactuca serriola	alien
Lactuca sibirica	alien
Lactuca virosa	alien
Lactuca tatarica	alien
Lagenaria siceraria	alien
Lagerstroemia indica	alien
Lagoecia cuminoides	alien
Lagunaria patersonii	alien
Lagurus ovatus	alien
Lallemantia iberica	alien
Lamarckia aurea	alien
Lamium amplexicaule	alien
Lamium maculatum	alien
Lamium orvala	alien
Lamium purpureum	alien
Lampranthus multiradiatus	alien
Lampranthus deltoides	alien
Lantana camara	alien
Lantana montevidensis	alien
Lappula squarrosa	alien
Lappula deflexa	alien
Lapsana communis	alien
Larix decidua	alien
Larix gmelinii	alien
Larix laricina	alien
Larix kaempferi	alien
Laserpitium siler	alien
Lathraea clandestina	alien
Lathyrus annuus	alien
Lathyrus aphaca	alien
Lathyrus cicera	alien
Lathyrus clymenum	alien
Lathyrus grandiflorus	alien
Lathyrus heterophyllus	alien
Lathyrus hirsutus	alien
Lathyrus incurvus	alien
Lathyrus japonicus	alien
Lathyrus latifolius	alien
Lathyrus niger	alien
Lathyrus nissolia	alien
Lathyrus ochrus	alien
Lathyrus odoratus	alien
Lathyrus palustris	alien
Lathyrus pratensis	alien
Lathyrus sativus	alien
Lathyrus setifolius	alien
Lathyrus sphaericus	alien
Lathyrus sylvestris	alien
Lathyrus tingitanus	alien
Lathyrus tuberosus	alien
Laurus nobilis	alien
Lavandula angustifolia	alien
Lavandula dentata	alien
Lavandula latifolia	alien
Lavandula stoechas	alien
Lavandula viridis	alien
Lavatera arborea	alien
Lavatera cretica	alien
Lavatera punctata	alien
Lavatera trimestris	alien
Lavatera thuringiaca	alien
Lawsonia inermis	alien
Ledum palustre	alien
Leersia oryzoides	alien
Legousia hybrida	alien
Legousia speculum-veneris	alien
Lembotropis nigricans	alien
Lemna minor	alien
Lens culinaris	alien
Lens nigricans	alien
Leontodon hispidus	alien
Leontodon saxatilis	alien
Leonurus cardiaca	alien
Leonurus japonicus	alien
Leonurus sibiricus	alien
Leonurus marrubiastrum	alien
Lepidium campestre	alien
Lepidium densiflorum	alien
Lepidium graminifolium	alien
Lepidium heterophyllum	alien
Lepidium latifolium	alien
Lepidium perfoliatum	alien
Lepidium ruderale	alien
Lepidium sativum	alien
Lepidium virginicum	alien
Leptospermum lanigerum	alien
Leptospermum scoparium	alien
Leucaena leucocephala	alien
Leucanthemella serotina	alien
Leucanthemum maximum	alien
Leucanthemum vulgare	alien
Leucanthemum x superbum	alien
Leucojum aestivum	alien
Leucojum vernum	alien
Levisticum officinale	alien
Leycesteria formosa	alien
Leymus arenarius	alien
Libertia formosa	alien
Ligularia dentata	alien
Ligularia przewalskii	alien
Ligularia sibirica	alien
Ligusticum scoticum	alien
Ligustrum henryi	alien
Ligustrum lucidum	alien
Ligustrum ovalifolium	alien
Ligustrum sinense	alien
Ligustrum vulgare	alien
Lilium candidum	alien
Lilium lancifolium	alien
Lilium martagon	alien
Lilium monadelphum	alien
Lilium pyrenaicum	alien
Limnanthes douglasii	alien
Limonium meyeri	alien
Limonium sinuatum	alien
Limonium vulgare	alien
Limosella aquatica	alien
Linaria angustissima	alien
Linaria arvensis	alien
Linaria genistifolia	alien
Linaria hirta	alien
Linaria purpurea	alien
Linaria repens	alien
Linaria simplex	alien
Linaria supina	alien
Linaria triornithophora	alien
Linaria vulgaris	alien
Lindernia procumbens	alien
Linnaea borealis	alien
Linum austriacum	alien
Linum bienne	alien
Linum grandiflorum	alien
Linum narbonense	alien
Linum perenne	alien
Linum trigynum	alien
Linum usitatissimum	alien
Liquidambar styraciflua	alien
Liriodendron tulipifera	alien
Lithospermum officinale	alien
Lithospermum arvense	alien
Lobelia erinus	alien
Lobelia inflata	alien
Lobelia siphilitica	alien
Lobelia urens	alien
Lobularia maritima	alien
Lolium multiflorum	alien
Lolium perenne	alien
Lolium remotum	alien
Lolium temulentum	alien
Lonicera alpigena	alien
Lonicera caerulea	alien
Lonicera caprifolium	alien
Lonicera etrusca	alien
Lonicera involucrata	alien
Lonicera japonica	alien
Lonicera pileata	alien
Lonicera maackii	alien
Lonicera periclymenum	alien
Lonicera ruprechtiana	alien
Lonicera tatarica	alien
Lonicera xylosteum	alien
Lonicera nitida	alien
Lonicera x purpusii	alien
Lopezia racemosa	alien
Lophospermum erubescens	alien
Lotus angustissimus	alien
Lotus corniculatus	alien
Lotus cytisoides	alien
Ludwigia alternifolia	alien
Lunaria annua	alien
Lupinus albus	alien
Lupinus angustifolius	alien
Lupinus arboreus	alien
Lupinus luteus	alien
Lupinus nootkatensis	alien
Lupinus perennis	alien
Lupinus polyphyllus	alien
Lupinus x regalis	alien
Luronium natans	alien
Luzula campestris	alien
Luzula forsteri	alien
Luzula luzuloides	alien
Luzula multiflora	alien
Luzula nivea	alien
Lychnis chalcedonica	alien
Lycium afrum	alien
Lycium barbarum	alien
Lycium chinense	alien
Lycium europaeum	alien
Lycopersicon esculentum	alien
Lycopus europaeus	alien
Lycopus exaltatus	alien
Lysichiton americanus	alien
Lysimachia atropurpurea	alien
Lysimachia nummularia	alien
Lysimachia punctata	alien
Lysimachia ciliata	alien
Lythrum virgatum	alien
Macleaya cordata	alien
Maclura pomifera	alien
Madia sativa	alien
Magnolia grandiflora	alien
Magnolia stellata	alien
Magnolia liliiflora	alien
Magydaris pastinacea	alien
Mahonia aquifolium	alien
Mahonia repens	alien
Maianthemum bifolium	alien
Malcolmia chia	alien
Malcolmia maritima	alien
Malope malacoides	alien
Malope trifida	alien
Malus baccata	alien
Malus pumila	alien
Malus domestica	alien
Malus sylvestris	alien
Malus floribunda	alien
Malus sachalinensis	alien
Malus toringo	alien
Malus trilobata	alien
Malva alcea	alien
Malva moschata	alien
Malva neglecta	alien
Malva nicaeensis	alien
Malva parviflora	alien
Malva pusilla	alien
Malva verticillata	alien
Mantisalca salmantica	alien
Markhamia platycalyx	alien
Marrubium peregrinum	alien
Marrubium vulgare	alien
Matricaria discoidea	alien
Matteuccia struthiopteris	alien
Matthiola incana	alien
Meconopsis cambrica	alien
Medicago arabica	alien
Medicago arborea	alien
Medicago falcata	alien
Medicago littoralis	alien
Medicago lupulina	alien
Medicago minima	alien
Medicago orbicularis	alien
Medicago polymorpha	alien
Medicago prostrata	alien
Medicago rigidula	alien
Medicago sativa	alien
Medicago scutellata	alien
Medicago truncatula	alien
Medicago turbinata	alien
Medicago x varia	alien
Melampyrum arvense	alien
Melampyrum nemorosum	alien
Melia azedarach	alien
Melilotus albus	alien
Melilotus dentatus	alien
Melilotus italicus	alien
Melilotus neapolitanus	alien
Melilotus officinalis	alien
Melilotus sulcatus	alien
Melissa officinalis	alien
Mentha arvensis	alien
Mentha longifolia	alien
Mentha pulegium	alien
Mentha spicata	alien
Mentha suaveolens	alien
Mentha x piperita	alien
Mercurialis annua	alien
Mesembryanthemum crystallinum	alien
Mespilus germanica	alien
Metasequoia glyptostroboides	alien
Mibora minima	alien
Microlepia platyphylla	alien
Micropyrum tenellum	alien
Mimosa pudica	alien
Mimulus cupreus	alien
Mimulus guttatus	alien
Mimulus luteus	alien
Minuartia hybrida	alien
Minuartia laricifolia	alien
Mirabilis jalapa	alien
Mirabilis longiflora	alien
Miscanthus sacchariflorus	alien
Miscanthus sinensis	alien
Misopates orontium	alien
Modiola caroliniana	alien
Moenchia erecta	alien
Molopospermum peloponnesiacum	alien
Momordica charantia	alien
Monarda didyma	alien
Monarda punctata	alien
Moneses uniflora	alien
Moraea iridioides	alien
Moricandia arvensis	alien
Morus alba	alien
Morus nigra	alien
Morus rubra	alien
Muhlenbergia mexicana	alien
Murdannia keisak	alien
Muscari armeniacum	alien
Muscari botryoides	alien
Muscari neglectum	alien
Muscari azureum	alien
Myagrum perfoliatum	alien
Mycelis muralis	alien
Myoporum laetum	alien
Myosotis alpestris	alien
Myosotis arvensis	alien
Myosotis discolor	alien
Myosotis ramosissima	alien
Myosotis stricta	alien
Myosotis sylvatica	alien
Myosurus minimus	alien
Myrica pensylvanica	alien
Myricaria germanica	alien
Myrrhis odorata	alien
Myrsine africana	alien
Myrtus communis	alien
Najas marina	alien
Narcissus bulbocodium	alien
Narcissus jonquilla	alien
Narcissus papyraceus	alien
Narcissus poeticus	alien
Narcissus pseudonarcissus	alien
Narcissus tazetta	alien
Nelumbo nucifera	alien
Nemophila menziesii	alien
Nepeta amoena	alien
Nepeta cataria	alien
Nepeta grandiflora	alien
Nepeta mussinii	alien
Nepeta sibirica	alien
Nephrolepis cordifolia	alien
Nephrolepis exaltata	alien
Nerium oleander	alien
Nicandra physalodes	alien
Nicotiana alata	alien
Nicotiana glauca	alien
Nicotiana langsdorffii	alien
Nicotiana longiflora	alien
Nicotiana paniculata	alien
Nicotiana rustica	alien
Nicotiana sylvestris	alien
Nicotiana tabacum	alien
Nicotiana x sanderae	alien
Nigella arvensis	alien
Nigella damascena	alien
Nigella hispanica	alien
Nigella sativa	alien
Nonea lutea	alien
Nopalea dejecta	alien
Nothoscordum borbonicum	alien
Nothoscordum gracile	alien
Notobasis syriaca	alien
Nuphar pumila	alien
Nymphaea alba	alien
Nymphaea lotus	alien
Nymphaea mexicana	alien
Nymphoides peltata	alien
Ochna atropurpurea	alien
Ochna serrulata	alien
Ocimum basilicum	alien
Ocotea foetens	alien
Odontites luteus	alien
Odontites vulgaris	alien
Oemleria cerasiformis	alien
Oenanthe javanica	alien
Oenanthe pimpinelloides	alien
Oenanthe silaifolia	alien
Oenothera biennis	alien
Oenothera deflexa	alien
Oenothera elata	alien
Oenothera fruticosa	alien
Oenothera glazioviana	alien
[truncated: 1,131 more rows]
