# Supplementary material for: Integrating Biodiversity Data into Botanic Collections
Source: Biodivers Data J. 2016 May 20;(4):e7971. doi: 10.3897/BDJ.4.e7971 (PMC4910503; doi:10.3897/BDJ.4.e7971)
Supplement: Supplementary material 8 — Taxa with BOLD public records [file biodiversity_data_journal-4-e7971-s008.csv]

taxon	alternative	pubRec	type
Abelia chinensis		5	original
Abelia floribunda		4	original
Abelia x grandiflora		5	original
Abeliophyllum distichum		2	original
Abelmoschus manihot		2	original
Abelmoschus moschatus		3	original
Abies alba		8	original
Abies balsamea		7	original
Abies cephalonica		2	original
Abies cilicica		1	original
Abies concolor var. concolor	Abies concolor	5	TPLaccepted
Abies firma		8	original
Abies holophylla		13	original
Abies koreana		9	original
Abies nordmanniana		3	original
Abies numidica		5	original
Abies pinsapo		4	original
Abies procera		2	original
Abies sibirica		3	original
Abronia fragrans	Abronia carletonii	1	TPLsynonym
Abrus precatorius		21	original
Abutilon indicum		4	original
Abutilon theophrasti		8	original
Abutilon vitifolium	Corynabutilon vitifolium	1	TPLaccepted
Acacia cardiophylla		1	original
Acacia catechu		5	original
Acacia cavenia	Acacia caven	2	TPLaccepted
Acacia cyclops		1	original
Acacia dealbata		5	original
Acacia deanei		1	original
Acacia decurrens		1	original
Acacia elata		2	original
Acacia farnesiana		2	original
Acacia glaucoptera		1	original
Acacia karroo		7	original
Acacia longifolia		13	original
Acacia mearnsii		6	original
Acacia melanoxylon		17	original
Acacia podalyriifolia		1	original
Acacia pubescens		1	original
Acacia saligna		2	original
Acacia sieberiana		3	original
Acacia spectabilis		1	original
Acacia verticillata		2	original
Acalypha hispida		6	original
Acalypha virginica		2	original
Acanthocalycium spiniflorum		1	original
Acantholimon acerosum		1	original
Acanthopanax divaricatus	Eleutherococcus divaricatus	1	TPLaccepted
Acanthopanax giraldii	Eleutherococcus giraldii	3	TPLaccepted
Acanthopanax sessiliflorus	Eleutherococcus sessiliflorus	6	TPLaccepted
Acanthospermum hispidum		4	original
Acanthostachys pitcairnioides		1	original
Acanthostachys strobilacea		3	original
Acanthus hungaricus	Acanthus longifolius	1	TPLsynonym
Acanthus ilicifolius		5	original
Acanthus longifolius		1	original
Acanthus montanus		2	original
Acca sellowiana		5	original
Acer barbinerve		4	original
Acer buergerianum		3	original
Acer campestre		254	original
Acer capillipes		8	original
Acer cappadocicum		1	original
Acer cappadocicum ssp. lobelii	Acer lobelii	32	TPLsynonym
Acer carpinifolium		8	original
Acer circinatum		4	original
Acer cissifolium		7	original
Acer davidii		9	original
Acer diabolicum f. purpurascens	Acer diabolicum	6	TPLaccepted
Acer distylum		5	original
Acer erianthum		9	original
Acer glabrum		11	original
Acer grandidentatum		8	original
Acer griseum		8	original
Acer heldreichii		5	original
Acer henryi		5	original
Acer ibericum		11	original
Acer japonicum		8	original
Acer laevigatum		1	original
Acer laxiflorum		1	original
Acer macrophyllum		12	original
Acer mandshuricum		4	original
Acer maximowiczianum		11	original
Acer micranthum		4	original
Acer miyabei		4	original
Acer mono		1	original
Acer monspessulanum		5	original
Acer negundo		25	original
Acer oblongum		1	original
Acer oliverianum	Acer oliverianum subsp. oliverianum	3	TPLsynonym
Acer opalus		2	original
Acer palmatum		5	original
Acer platanoides		29	original
Acer pseudoplatanus		54	original
Acer rubrum		29	original
Acer rufinerve		8	original
Acer saccharinum		24	original
Acer saccharum		18	original
Acer semenovii	Acer tataricum subsp. semenovii	2	TPLaccepted
Acer sempervirens		25	original
Acer shirasawanum		8	original
Acer sieboldianum		3	original
Acer spicatum		10	original
Acer tataricum		6	original
Acer tataricum ssp. ginnala	Acer ginnala	1	TPLsynonym
Acer tegmentosum		2	original
Acer trautvetteri		8	original
Acer truncatum		4	original
Acer velutinum		19	original
Achillea abrotanoides		1	original
Achillea ageratum		1	original
Achillea asiatica		2	original
Achillea atrata		1	original
Achillea aurea	Tanacetum chiliophyllum	1	TPLsynonym
Achillea barrelieri ssp. oxyloba	Achillea oxyloba	1	TPLaccepted
Achillea biserrata		1	original
Achillea clavennae		3	original
Achillea clusiana		1	original
Achillea clypeolata		2	original
Achillea collina		3	original
Achillea crithmifolia		1	original
Achillea distans		1	original
Achillea erba-rotta	Achillea nana	1	TPLsynonym
Achillea erba-rotta ssp. ambigua	Achillea nana	1	TPLsynonym
Achillea erba-rotta ssp. moschata	Achillea moschata	1	TPLsynonym
Achillea filipendulina		3	original
Achillea grandiflora	Achillea ptarmicifolia	1	TPLaccepted
Achillea grandifolia		1	original
Achillea latiloba		1	original
Achillea ligustica		1	original
Achillea macrophylla		1	original
Achillea millefolium		28	original
Achillea nana		1	original
Achillea nobilis		1	original
Achillea ochroleuca		1	original
Achillea pannonica		1	original
Achillea ptarmica		7	original
Achillea pyrenaica		1	original
Achillea setacea		7	original
Achillea sibirica	Achillea alpina	1	TPLaccepted
Achillea tenuifolia		1	original
Achillea vermicularis		2	original
Achimenes coccinea	Achimenes erecta	2	TPLaccepted
Achnatherum calamagrostis		5	original
Achyrachaena mollis		1	original
Achyranthes aspera		9	original
Achyranthes bidentata		5	original
Acicarpha tribuloides		9	original
Acinos alpinus ssp. meridionalis	Clinopodium alpinum	6	TPLaccepted
Aciphylla aurea		2	original
Acmena acuminatissima	Syzygium acuminatissimum	2	TPLaccepted
Acokanthera oblongifolia		4	original
Acokanthera oppositifolia		4	original
Aconitum alboviolaceum		4	original
Aconitum anthora		2	original
Aconitum barbatum		3	original
Aconitum carmichaelii		3	original
Aconitum ferox		6	original
Aconitum fischeri	Aconitum napellus	6	TPLsynonym
Aconitum kusnezoffii		2	original
Aconitum napellus		6	original
Aconitum orientale	Aconitum lycoctonum	2	TPLsynonym
Aconitum rogoviczii	Aconitum lycoctonum	2	TPLaccepted
Aconitum variegatum ssp. paniculatum	Aconitum degenii subsp. paniculatum	1	TPLaccepted
Aconitum villosum	Aconitum napellus	6	TPLsynonym
Aconitum yezoense	Aconitum sachalinense subsp. yezoense	23	TPLaccepted
Aconogonon alpinum		4	original
Aconogonon divaricatum		1	original
Aconogonon weyrichii	Persicaria weyrichii	1	TPLaccepted
Acorus calamus		60	original
Acorus gramineus		34	original
Acronychia pedunculata		4	original
Acrostichum aureum		6	original
Actaea asiatica		3	original
Actaea japonica		1	original
Actaea pachypoda		8	original
Actaea podocarpa		2	original
Actaea racemosa		24	original
Actaea rubra		13	original
Actaea spicata		5	original
Actephila javanica	Actephila excelsa var. javanica	1	TPLaccepted
Actinidia arguta		1	original
Actinidia chinensis		17	original
Actinidia melanandra		1	original
Actinidia polygama		4	original
Actiniopteris semiflabellata		2	original
Actinorhytis calapparia		2	original
Adansonia digitata		7	original
Adenanthera pavonina		11	original
Adenium obesum		3	original
Adenocarpus decorticans		2	original
Adenocarpus foliolosus		2	original
Adenocaulon chilense		3	original
Adenophora confusa	Adenophora stricta subsp. confusa	1	TPLaccepted
Adenophora khasiana		3	original
Adenophora kurilensis	Adenophora triphylla	3	TPLaccepted
Adenophora liliifolia		4	original
Adenophora stenanthina		4	original
Adenophora stricta		3	original
Adenophora taquetii		3	original
Adenophora triphylla var. japonica		3	original
Adenostyles alliariae		5	original
Adenostyles glabra	Adenostyles alpina	2	TPLaccepted
Adiantum capillus-veneris		15	original
Adiantum caudatum		1	original
Adiantum concinnum		1	original
Adiantum cunninghamii		2	original
Adiantum diaphanum		4	original
Adiantum formosum		2	original
Adiantum hispidulum		9	original
Adiantum jordanii		1	original
Adiantum pedatum		26	original
Adiantum peruvianum		4	original
Adiantum raddianum		6	original
Adiantum subcordatum		1	original
Adiantum tenerum		2	original
Adiantum tetraphyllum		1	original
Adiantum venustum		3	original
Adlumia fungosa		1	original
Adonidia merrillii		2	original
Adonis aestivalis		1	original
Adonis annua		2	original
Adonis vernalis		1	original
Adoxa moschatellina		13	original
Aechmea calyculata		4	original
Aechmea cariocae	Chevaliera cariocae	1	TPLsynonym
Aechmea coelestis		4	original
Aechmea conspicuiarmata	Aechmea bromeliifolia	9	TPLaccepted
Aechmea fasciata		2	original
Aechmea filicaulis		1	original
Aechmea fulgens		1	original
Aechmea lagenaria	Aechmea lamarchei	4	TPLaccepted
Aechmea nudicaulis var. nudicaulis		2	original
Aechmea recurvata		7	original
Aechmea sphaerocephala	Chevaliera sphaerocephala	3	TPLsynonym
Aegilops cylindrica		15	original
Aegilops geniculata		16	original
Aegilops speltoides		13	original
Aegilops tauschii		16	original
Aegilops triuncialis		59	original
Aegilops ventricosa		6	original
Aeginetia indica		2	original
Aegle marmelos		8	original
Aegopodium podagraria		8	original
Aeonium aureum		1	original
Aeonium canariense		1	original
Aeonium ciliatum		1	original
Aeonium decorum		1	original
Aeonium glandulosum		1	original
Aeonium glutinosum		1	original
Aeonium lindleyi		1	original
Aeonium percarneum		3	original
Aeonium saundersii		1	original
Aeonium sedifolium		1	original
Aeonium simsii		1	original
Aeonium spathulatum		1	original
Aeonium undulatum		1	original
Aeonium viscatum		1	original
Aerva scandens	Aerva sanguinolenta	5	TPLaccepted
Aeschynanthus marmoratus	Aeschynanthus longicaulis	3	TPLaccepted
Aeschynanthus parasiticus	Aeschynanthus macranthus	2	TPLsynonym
Aesculus californica		10	original
Aesculus flava		11	original
Aesculus glabra		7	original
Aesculus hippocastanum		12	original
Aesculus indica		8	original
Aesculus parviflora		8	original
Aesculus pavia		13	original
Aesculus turbinata		8	original
Aethionema grandiflorum		4	original
Aethionema oppositifolium	Iberis oppositifolia	1	TPLsynonym
Aethionema saxatile		2	original
Aethusa cynapium		5	original
Afrocarpus mannii		7	original
Afzelia quanzensis		3	original
Agapanthus africanus		8	original
Agapanthus campanulatus		3	original
Agapanthus praecox		2	original
Agastache mexicana		1	original
Agastache rugosa		7	original
Agastache scrophulariifolia		1	original
Agastache urticifolia		1	original
Agathis borneensis		4	original
Agathis robusta		8	original
Agave americana ssp. americana	Agave americana	10	TPLaccepted
Agave attenuata		1	original
Agave nizandensis		2	original
Agave potatorum var. verschaffeltii	Agave potatorum	2	TPLaccepted
Agave schottii		1	original
Agave striata ssp. stricta	Agave stricta	1	TPLaccepted
Agave titanota		2	original
Agave victoriae-reginae		2	original
Ageratina adenophora		3	original
Ageratina altissima		2	original
Ageratum conyzoides		12	original
Ageratum houstonianum		3	original
Aglaia elliptica		9	original
Aglaomorpha drynarioides		1	original
Aglaomorpha heraclea		1	original
Aglaomorpha meyeniana		2	original
Aglaomorpha novoguineensis		1	original
Aglaonema crispum		2	original
Aglaonema modestum		2	original
Agoseris aurantiaca		2	original
Agrimonia eupatoria		8	original
Agrimonia gryposepala		3	original
Agrimonia japonica	Agrimonia pilosa	2	TPLaccepted
Agrimonia parviflora		2	original
Agrimonia procera		5	original
Agropyron desertorum		2	original
Agropyron pectiniforme	Agropyron cristatum	16	TPLaccepted
Agrostemma githago		7	original
Agrostis canina		6	original
Agrostis capillaris		18	original
Agrostis gigantea		15	original
Agrostis stolonifera		50	original
Aichryson laxum		1	original
Aichryson pachycaulon		1	original
Aichryson punctatum		1	original
Ailanthus altissima		16	original
Ainsliaea acerifolia var. subapoda		1	original
Ainsliaea fragrans		1	original
Ainsworthia trachycarpa		3	original
Aiphanes aculeata	Aiphanes horrida	5	TPLaccepted
Aira caryophyllea		11	original
Aira praecox		10	original
Aizoon canariense		1	original
Ajuga chamaepitys		3	original
Ajuga reptans		10	original
Akebia quinata		7	original
Akebia trifoliata		2	original
Alangium javanicum		1	original
Alangium platanifolium		6	original
Albizia julibrissin		11	original
Albuca angolensis	Albuca abyssinica	3	TPLaccepted
Albuca shawii		7	original
Alcea rosea		1	original
Alcea rugosa		1	original
Alchemilla acutiloba		2	original
Alchemilla alpina		4	original
Alchemilla bulgarica	Alchemilla transiens	1	TPLsynonym
Alchemilla colorata		1	original
Alchemilla conjuncta	Alchemilla splendens	1	TPLsynonym
Alchemilla epipsila		1	original
Alchemilla erythropoda		1	original
Alchemilla fissa		1	original
Alchemilla flabellata		1	original
Alchemilla glacialis		1	original
Alchemilla glaucescens		2	original
Alchemilla hybrida	Alchemilla lapeyrousii	1	TPLsynonym
Alchemilla japonica		2	original
Alchemilla mollis		6	original
Alchemilla monticola		1	original
Alchemilla pentaphyllea		2	original
Alchemilla saxatilis		1	original
Alchemilla splendens		1	original
Alchemilla vulgaris		1	original
Alchornea scandens	Trophis scandens	1	TPLsynonym
Alectorurus yedoensis	Comospermum yedoense	5	TPLaccepted
Alectryon coriaceus		1	original
Aleurites fordii	Vernicia fordii	4	TPLaccepted
Aleurites moluccanus		2	original
Alfredia cernua		3	original
Alhagi pseudalhagi		1	original
Alisma canaliculatum		3	original
Alisma gramineum		4	original
Alisma lanceolatum		6	original
Alisma plantago-aquatica		7	original
Alisma plantago-aquatica ssp. plantago-aquatica	Alisma plantago-aquatica	7	TPLaccepted
Alkanna orientalis		4	original
Alkanna tinctoria		4	original
Allamanda cathartica		7	original
Allamanda schottii		4	original
Alliaria petiolata		18	original
Allium aflatunense		3	original
Allium albidum		3	original
Allium altaicum		9	original
Allium altissimum		2	original
Allium altyncolicum		1	original
Allium ampeloprasum		94	original
Allium amplectens		1	original
Allium angulosum		1	original
Allium aschersonianum		1	original
Allium atropurpureum		3	original
Allium atroviolaceum		2	original
Allium auctum	Allium cyrilli	2	TPLaccepted
Allium baeticum	Allium ampeloprasum	94	TPLsynonym
Allium beesianum		1	original
Allium bidentatum		2	original
Allium brevistylum		2	original
Allium bucharicum		2	original
Allium caeruleum		2	original
Allium caesium		1	original
Allium cardiostemon		4	original
Allium carinatum		1	original
Allium carolinianum		1	original
Allium cepa		20	original
Allium cernuum		3	original
Allium chinense		2	original
Allium clathratum		1	original
Allium cyaneum		4	original
Allium decipiens		2	original
Allium derderianum		3	original
Allium drummondii		3	original
Allium ericetorum		2	original
Allium fistulosum		16	original
Allium flavescens		1	original
Allium flavum		1	original
Allium flavum var. minus		1	original
Allium galanthum		4	original
Allium giganteum		3	original
Allium globosum	Allium saxatile	2	TPLaccepted
Allium heldreichii		1	original
Allium insubricum		2	original
Allium karataviense		5	original
Allium karelinii		1	original
Allium komarovianum		1	original
Allium ledebourianum		1	original
Allium macleanii		3	original
Allium macranthum		5	original
Allium macrostemon		18	original
Allium moly		2	original
Allium monadelphum		1	original
Allium narcissiflorum		1	original
Allium nigrum		5	original
Allium nutans		3	original
Allium ochotense		3	original
Allium oleraceum		4	original
Allium oreophilum		1	original
Allium oreoprasum		2	original
Allium oschaninii		6	original
Allium paradoxum		3	original
Allium platyspathum		1	original
Allium przewalskianum		5	original
Allium pskemense		4	original
Allium pyrenaicum		10	original
Allium roseum		4	original
Allium sarawschanicum		5	original
Allium sativum		9	original
Allium scabriscapum		1	original
Allium schoenoprasum		7	original
Allium scorodoprasum		6	original
Allium scorodoprasum ssp. rotundum	Allium ampeloprasum	94	TPLsynonym
Allium senescens		16	original
Allium senescens ssp. montanum	Allium lusitanicum	2	TPLaccepted
Allium siculum		2	original
Allium sikkimense		10	original
Allium sphaerocephalon		3	original
Allium spirale		4	original
Allium splendens		3	original
Allium stellatum		1	original
Allium stipitatum		6	original
Allium strictum		1	original
Allium suaveolens		1	original
Allium subhirsutum		3	original
Allium subvillosum		1	original
Allium suworowii		5	original
Allium textile		4	original
Allium thunbergii		13	original
Allium triquetrum		4	original
Allium tuberosum		32	original
Allium turkestanicum		2	original
Allium unifolium		1	original
Allium ursinum		9	original
Allium victorialis		9	original
Allium vineale		5	original
Allium vodopjanovae		2	original
Allium wallichii		7	original
Allium yunnanense	Allium mairei	3	TPLaccepted
Allium zebdanense		2	original
Allocasuarina verticillata		3	original
Allophylus cobbe		5	original
Alloplectus capitatus	Corytoplectus capitatus	1	TPLaccepted
Alniphyllum fortunei		5	original
Alnus alnobetula		5	original
Alnus cordata		7	original
Alnus firma		7	original
Alnus glutinosa		21	original
Alnus hirsuta		15	original
Alnus incana		11	original
Alnus japonica		11	original
Alnus nepalensis		9	original
Alnus orientalis		5	original
Alnus rubra		5	original
Alnus sinuata	Alnus alnobetula subsp. sinuata	2	TPLaccepted
Alnus viridis		1	original
Aloe arborescens		10	original
Aloe aristata		5	original
Aloe barbadensis	Aloe vera	17	TPLaccepted
Aloe buhrii		1	original
Aloe castanea		3	original
Aloe chabaudii		1	original
Aloe ciliaris		1	original
Aloe dawei		2	original
Aloe ferox		4	original
Aloe glauca		5	original
Aloe humilis		3	original
Aloe lutescens		1	original
Aloe marlothii		2	original
Aloe microstigma		3	original
Aloe plicatilis		7	original
Aloe pluridens		2	original
Aloe scobinifolia		2	original
Aloe sessiliflora	Aloe spicata	3	TPLaccepted
Aloe striata		6	original
Aloe striata ssp. karasbergensis	Aloe karasbergensis	2	TPLaccepted
Aloe striatula		1	original
Aloe suprafoliata		4	original
Aloe variegata		3	original
Alonsoa meridionalis		2	original
Alopecurus aequalis		15	original
Alopecurus arundinaceus		1	original
Alopecurus geniculatus		8	original
Alopecurus myosuroides		5	original
Alopecurus pratensis		16	original
Alpinia calcarata		4	original
Alpinia formosana		2	original
Alpinia galanga		30	original
Alpinia japonica		4	original
Alpinia officinarum		37	original
Alpinia purpurata		1	original
Alpinia zerumbet		19	original
Alstroemeria aurea		9	original
Alternanthera purpurea	Alternanthera paronychioides	1	TPLsynonym
Althaea armeniaca		1	original
Althaea cannabina		1	original
Althaea hirsuta		2	original
Althaea officinalis		5	original
Alysicarpus vaginalis		4	original
Alyssoides utriculata		4	original
Alyssum alpestre		1	original
Alyssum alyssoides		9	original
Alyssum argenteum	Alyssum alpestre	1	TPLsynonym
Alyssum corymbosum	Aurinia corymbosa	2	TPLaccepted
Alyssum cuneifolium		1	original
Alyssum lenense		2	original
Alyssum markgrafii		1	original
Alyssum montanum		7	original
Alyssum murale		8	original
Alyssum obovatum		7	original
Alyssum ovirense	Alyssum alpestre	1	TPLsynonym
Alyssum simplex		9	original
Alyssum sinuatum	Aurinia sinuata	3	TPLaccepted
Alyxia ruscifolia		2	original
Amaranthus albus		4	original
Amaranthus blitoides		2	original
Amaranthus blitum		2	original
Amaranthus caudatus		1	original
Amaranthus deflexus		5	original
Amaranthus hybridus		9	original
Amaranthus retroflexus		9	original
Amaranthus spinosus		15	original
Amaranthus tricolor		7	original
Amblynotus rupestris		1	original
Ambrosia artemisiifolia		12	original
Ambrosia trifida		7	original
Amelanchier alnifolia		7	original
Amelanchier canadensis		6	original
Amelanchier laevis		6	original
Amelanchier lamarckii		1	original
Amelanchier ovalis		3	original
Amelanchier sanguinea		3	original
Amelanchier spicata		6	original
Amelanchier utahensis		4	original
Amethystea caerulea		1	original
Amherstia nobilis		4	original
Ammannia coccinea		1	original
Ammi majus		6	original
Ammi visnaga		2	original
Ammobium alatum		3	original
Ammophila arenaria		6	original
Amomum compactum		6	original
Amomyrtus luma		3	original
Amorpha fruticosa		12	original
Amorphophallus albus		2	original
Amorphophallus bulbifer		1	original
Amorphophallus konjac		5	original
Amorphophallus krausei		2	original
Amorphophallus paeoniifolius		2	original
Amorphophallus titanum		4	original
Ampelopsis delavayana		1	original
Ampelopsis glandulosa var. brevipedunculata		1	original
Ampelopsis japonica		1	original
Ampelopsis megalophylla		1	original
Amphicarpaea bracteata		11	original
Amphitecna latifolia		1	original
Amsonia tabernaemontana		4	original
Amygdalus nana	Prunus tenella	4	TPLaccepted
Anacampseros australiana	Grahamia australiana	1	TPLaccepted
Anacampseros filamentosa		1	original
Anacampseros namaquensis	Anacampseros baeseckei	1	TPLsynonym
Anacampseros telephiastrum		3	original
Anacardium occidentale		6	original
Anacyclus clavatus		2	original
Anacyclus pyrethrum		7	original
Anadenanthera peregrina		3	original
Anagallis arvensis		21	original
Anagallis foemina		4	original
Anagallis monelli		1	original
Anagyris foetida		23	original
Anagyris latifolia		3	original
Anamirta cocculus		5	original
Ananas bracteatus	Ananas fritzmuelleri	1	TPLsynonym
Ananas comosus		6	original
Anaphalis flaccida		2	original
Anaphalis margaritacea		25	original
Anaphalis sinica		2	original
Anaphalis triplinervis		5	original
Anarrhinum bellidifolium		1	original
Anastatica hierochuntica		2	original
Anchomanes difformis		6	original
Anchusa arvensis		2	original
Anchusa azurea		2	original
Anchusa capensis		3	original
Anchusa officinalis		1	original
Andira inermis		8	original
Andrachne colchica	Leptopus chinensis	5	TPLaccepted
Andrographis paniculata		12	original
Andromeda polifolia		13	original
Andropogon gerardii		4	original
Androsace albana		2	original
Androsace alpina		1	original
Androsace amurensis	Androsace lactiflora	1	TPLsynonym
Androsace carnea ssp. laggeri	Androsace laggeri	2	TPLaccepted
Androsace chaixii		1	original
Androsace chamaejasme		1	original
Androsace chamaejasme ssp. lehmanniana	Androsace bungeana	1	TPLsynonym
Androsace filiformis		1	original
Androsace halleri		6	original
Androsace lactea		2	original
Androsace laevigata	Douglasia laevigata	1	TPLsynonym
Androsace lanuginosa		1	original
Androsace limprichtii		2	original
Androsace mathildae		3	original
Androsace maxima		2	original
Androsace mucronifolia	Androsace globifera	1	TPLsynonym
Androsace obtusifolia		2	original
Androsace puberula	Androsace adfinis subsp. puberula	1	TPLaccepted
Androsace pyrenaica		1	original
Androsace sempervivoides		1	original
Androsace septentrionalis		14	original
Androsace villosa	Androsace chamaejasme	1	TPLsynonym
Androsace wulfeniana		2	original
Andryala agardhii		1	original
Anemarrhena asphodeloides		13	original
Anemia dregeana		1	original
Anemia mexicana		2	original
Anemia phyllitidis		2	original
Anemia rotundifolia		1	original
Anemia tomentosa		2	original
Anemone altaica	Anemone nemorosa	5	TPLsynonym
Anemone canadensis		4	original
Anemone cylindrica		1	original
Anemone drummondii		1	original
Anemone hortensis		1	original
Anemone hupehensis		4	original
Anemone japonica	Clematis florida	1	TPLaccepted
Anemone multifida		8	original
Anemone nemorosa		5	original
Anemone palmata		1	original
Anemone parviflora		12	original
Anemone sylvestris		1	original
Anemone virginiana		9	original
Anemonoides ranunculoides	Anemone ranunculoides	1	TPLaccepted
Anemonopsis macrophylla		3	original
Anethum graveolens		7	original
Angelica amurensis		2	original
Angelica anomala		5	original
Angelica archangelica		4	original
Angelica atropurpurea		1	original
Angelica dahurica		21	original
Angelica gigas		4	original
Angelica polymorpha		5	original
Angelica sylvestris		5	original
Angelica ursina		1	original
Angiopteris evecta		8	original
Anisodontea capensis		1	original
Annona cherimola		1	original
Annona glabra		4	original
Annona lutescens	Annona reticulata	5	TPLaccepted
Annona montana		3	original
Annona muricata		6	original
Annona senegalensis		3	original
Annona squamosa		10	original
Anodendron paniculatum		1	original
Anogeissus leiocarpa		1	original
Anogramma leptophylla		5	original
Anredera cordifolia		9	original
Antennaria alpina		1	original
Antennaria aprica	Antennaria parvifolia	1	TPLaccepted
Antennaria carpatica		1	original
Antennaria dioica		7	original
Antennaria microphylla		4	original
Antennaria neglecta		4	original
Antennaria neglecta var. attenuata	Antennaria howellii subsp. neodioica	1	TPLaccepted
Antennaria plantaginifolia		4	original
Antennaria pulcherrima		4	original
Antennaria rosea		3	original
Antennaria rosea ssp. confinis	Leontopodium leontopodioides	4	TPLsynonym
Anthemis altissima	Anthemis arvensis	4	TPLsynonym
Anthemis arvensis		4	original
Anthemis austriaca	Cota austriaca	1	TPLaccepted
Anthemis cotula		5	original
Anthemis cretica ssp. cretica	Anthemis cretica	1	TPLaccepted
Anthemis maritima ssp. maritima	Anthemis maritima	2	TPLaccepted
Anthemis monantha	Cota monantha	1	TPLaccepted
Anthemis ruthenica		1	original
Anthemis segetalis	Cota segetalis	1	TPLaccepted
Anthemis tinctoria		1	original
Anthericum liliago		8	original
Anthericum ramosum		2	original
Anthocephalus cadamba		1	original
Anthoxanthum aristatum		1	original
Anthoxanthum odoratum		22	original
Anthoxanthum ovatum		1	original
Anthriscus caucalis		2	original
Anthriscus cerefolium		3	original
Anthriscus nitida		1	original
Anthriscus sylvestris		11	original
Anthurium andraeanum		2	original
Anthurium scherzerianum		1	original
Anthyllis cytisoides		1	original
Anthyllis hermanniae		3	original
Anthyllis montana		2	original
Anthyllis terniflora		2	original
Anthyllis vulneraria		6	original
Antiaris toxicaria		4	original
Antidesma bunius		3	original
Antigonon leptopus		9	original
Antirrhinum australe		5	original
Antirrhinum barrelieri		1	original
Antirrhinum hispanicum		5	original
Antirrhinum latifolium		11	original
Antirrhinum majus		16	original
Antirrhinum molle		14	original
Antirrhinum pulverulentum		13	original
Antirrhinum siculum		8	original
Aosa rupestris		1	original
Apera interrupta		3	original
Apera spica-venti		2	original
Aphanamixis polystachya		12	original
Aphanes arvensis		3	original
Aphanes inexspectata	Aphanes australis	2	TPLaccepted
Aphania senegalensis	Lepisanthes senegalensis	2	TPLaccepted
Aphyllanthes monspeliensis		5	original
Apium australe		4	original
Apium graveolens		13	original
Apocynum cannabinum		6	original
Aptenia cordifolia		3	original
Aquilegia alpina		4	original
Aquilegia atrata		8	original
Aquilegia atrovinosa		1	original
Aquilegia aurea		2	original
Aquilegia bernardii		3	original
Aquilegia bertolonii		3	original
Aquilegia buergeriana		1	original
Aquilegia californica	Aquilegia formosa	2	TPLaccepted
Aquilegia canadensis		10	original
Aquilegia chrysantha		3	original
Aquilegia einseleana		4	original
Aquilegia flabellata var. pumila	Aquilegia flabellata	2	TPLaccepted
Aquilegia flavescens		2	original
Aquilegia fragrans		2	original
Aquilegia glandulosa		3	original
Aquilegia grata		1	original
Aquilegia hybrida	Aquilegia viridiflora	1	TPLaccepted
Aquilegia jonesii		1	original
Aquilegia laramiensis		2	original
Aquilegia longissima		1	original
Aquilegia magellensis		1	original
Aquilegia nigricans		3	original
Aquilegia olympica		3	original
Aquilegia oxysepala		20	original
Aquilegia parviflora		2	original
Aquilegia pyrenaica		3	original
Aquilegia rockii		1	original
Aquilegia scopulorum		3	original
Aquilegia sibirica		3	original
Aquilegia skinneri		2	original
Aquilegia thalictrifolia		12	original
Aquilegia viscosa		3	original
Aquilegia vulgaris		13	original
Aquilegia vulgaris var. transsylvanica	Aquilegia transsilvanica	1	TPLaccepted
Aquilegia yabeana		4	original
Arabidopsis thaliana		35	original
Arabis allionii		2	original
Arabis alpina		14	original
Arabis amplexicaulis		1	original
Arabis androsacea		2	original
Arabis aubrietioides		4	original
Arabis auriculata	Arabis nova	1	TPLaccepted
Arabis blepharophylla		1	original
Arabis bryoides		1	original
Arabis caerulea		2	original
Arabis ciliata	Arabis hirsuta	11	TPLsynonym
Arabis drummondii	Boechera stricta	2	TPLaccepted
Arabis hirsuta		11	original
Arabis holboellii	Boechera holboellii	1	TPLaccepted
Arabis nemorensis	Arabis alpina	14	TPLsynonym
Arabis procurrens		1	original
Arabis sagittata		2	original
Arabis soyeri		2	original
Arabis turrita	Pseudoturritis turrita	2	TPLsynonym
Arabis vochinensis		1	original
Arachis hypogaea		21	original
Arachniodes aristata		4	original
Arachniodes simplicior		1	original
Araeococcus flagellifolius		1	original
Aralia californica		1	original
Aralia chinensis		2	original
Aralia cordata		1	original
Aralia elata		2	original
Aralia racemosa		8	original
Aralia spinosa		4	original
Araucaria angustifolia		6	original
Araucaria araucana		10	original
Araucaria bidwillii		8	original
Araucaria columnaris		7	original
Araucaria cunninghamii		14	original
Araucaria heterophylla		8	original
Araujia sericifera		3	original
Arbutus unedo		4	original
Arcangelisia flava		2	original
Archontophoenix alexandrae		2	original
Arctium lappa		45	original
Arctium minus		22	original
Arctium tomentosum		2	original
Arctostaphylos uva-ursi		11	original
Arctotheca calendula		10	original
Arctotis acaulis		2	original
Arctotis fastuosa		2	original
Arctotis venusta		1	original
Ardisia crenata		31	original
Ardisia crispa		4	original
Ardisia guianensis		4	original
Ardisia humilis		6	original
Ardisia japonica		15	original
Ardisia littoralis	Ardisia elliptica	8	TPLaccepted
Ardisia solanacea		2	original
Areca hutchinsoniana		2	original
Arenaria bertolonii		1	original
Arenaria grandiflora		2	original
Arenaria gypsophiloides		1	original
Arenaria kingii	Eremogone kingii	1	TPLaccepted
Arenaria leptoclados		3	original
Arenaria lychnidea	Eremogone lychnidea	1	TPLaccepted
Arenaria multicaulis	Arenaria moehringioides	1	TPLsynonym
Arenaria oscensis		2	original
Arenaria procera	Arenaria koriniana	1	TPLsynonym
Arenaria procera ssp. glabra	Arenaria syreistschikowii	1	TPLsynonym
Arenaria pungens		1	original
Arenaria purpurascens		1	original
Arenaria serpyllifolia		9	original
Arenga caudata		17	original
Arenga engleri		7	original
Arenga microcarpa		2	original
Arenga pinnata		5	original
Argemone mexicana		6	original
Argemone subfusiformis		1	original
Argyranthemum callichrysum		2	original
Argyranthemum frutescens		2	original
Argyrolobium zanonii		2	original
Ariocarpus fissuratus		2	original
Ariocarpus kotschoubeyanus ssp. albiflorus	Ariocarpus kotschoubeyanus	1	TPLaccepted
Ariocarpus retusus		2	original
Ariocarpus trigonus		1	original
Arisaema amurense		4	original
Arisaema consanguineum		1	original
Arisaema dracontium		2	original
Arisaema flavum		1	original
Arisaema heterophyllum		13	original
Arisaema japonicum	Arisaema serratum	3	TPLaccepted
Arisaema tortuosum		3	original
Aristida purpurea		8	original
Aristolochia arborea		4	original
Aristolochia bodamae	Aristolochia hirta	1	TPLaccepted
Aristolochia bottae		1	original
Aristolochia clematitis		10	original
Aristolochia contorta		1	original
Aristolochia elegans		1	original
Aristolochia fimbriata		3	original
Aristolochia gigantea		6	original
Aristolochia grandiflora var. hookeri	Aristolochia grandiflora	5	TPLaccepted
Aristolochia labiata		2	original
Aristolochia lindneri		1	original
Aristolochia macrophylla		5	original
Aristolochia macroura		2	original
Aristolochia manshuriensis		3	original
Aristolochia sempervirens		2	original
Aristolochia tomentosa		4	original
Aristolochia trilobata		2	original
Armeria arenaria		1	original
Armeria berlengensis		2	original
Armeria girardii	Armeria filicaulis var. minor	4	TPLsynonym
Armeria macrophylla		7	original
Armeria maritima ssp. andina	Armeria scabra	3	TPLsynonym
Armeria maritima ssp. halleri	Armeria bottendorfensis	1	TPLsynonym
Armeria maritima ssp. maritima	Armeria maritima	12	TPLaccepted
Armeria maritima ssp. sibirica	Armeria scabra	3	TPLsynonym
Armeria pungens		180	original
Armeria rouyana		3	original
Armeria ruscinonensis	Armeria maritima	12	TPLsynonym
Armeria splendens		13	original
Armeria welwitschii		8	original
Armoracia rusticana		5	original
Arnica angustifolia		5	original
Arnica chamissonis		13	original
Arnica griscomii ssp. frigida	Arnica frigida	1	TPLsynonym
Arnica lanceolata		1	original
Arnica lessingii		1	original
Arnica lonchophylla		1	original
Arnica longifolia		6	original
Arnica mollis		4	original
Arnica montana		8	original
Arnica parryi		6	original
Arnica rydbergii		1	original
Arnica sachalinensis		1	original
Arnoseris minima		5	original
Aronia arbutifolia		5	original
Aronia melanocarpa		5	original
Aronia x prunifolia		1	original
Arrhenatherum elatius		41	original
Artabotrys hexapetalus		3	original
Artemisia absinthium		6	original
Artemisia annua		20	original
Artemisia arborescens	Artemisia argentea	1	TPLsynonym
Artemisia argentea		1	original
Artemisia atrata		1	original
Artemisia austriaca	Artemisia frigida	7	TPLsynonym
Artemisia biennis		3	original
Artemisia campestris		6	original
Artemisia campestris ssp. borealis	Artemisia borealis	4	TPLsynonym
Artemisia chamaemelifolia ssp. chamaemelifolia	Artemisia chamaemelifolia	1	TPLaccepted
Artemisia dracunculus		4	original
Artemisia eriantha		1	original
Artemisia frigida		7	original
Artemisia genipi	Artemisia rupestris	3	TPLsynonym
Artemisia glacialis		1	original
Artemisia gmelinii		4	original
Artemisia lactiflora		9	original
Artemisia maritima		2	original
Artemisia michauxiana		4	original
Artemisia mongolica		1	original
Artemisia pedemontana	Artemisia glacialis	1	TPLsynonym
Artemisia pontica		1	original
Artemisia rupestris		3	original
Artemisia scoparia		4	original
Artemisia sieberi		1	original
Artemisia stelleriana		1	original
Artemisia thuscula	Artemisia argentea	1	TPLsynonym
Artemisia umbelliformis	Artemisia rupestris	3	TPLsynonym
Artemisia vallesiaca		1	original
Artemisia verlotiorum	Artemisia selengensis	1	TPLsynonym
Artemisia vulgaris		9	original
Arthrocnemum macrostachyum		5	original
Arthrocnemum perenne	Sarcocornia perennis	4	TPLaccepted
Arthropodium cirrhatum		3	original
Artocarpus altilis		6	original
Artocarpus camansi		3	original
Artocarpus heterophyllus		8	original
Artocarpus lakoocha		5	original
Arum apulum		4	original
Arum balansanum		3	original
Arum conophalloides	Arum rupicola	5	TPLaccepted
Arum creticum		5	original
Arum cylindraceum		6	original
Arum cyrenaicum		8	original
Arum dioscoridis		5	original
Arum elongatum		4	original
Arum italicum		14	original
Arum maculatum		13	original
Arum nigrum		5	original
Arum orientale		3	original
Arum pictum		29	original
Arum purpureospathum		6	original
Aruncus aethusifolius		1	original
Aruncus kamtschaticus	Aruncus dioicus	5	TPLaccepted
Arundo donax		24	original
Asarina procumbens		1	original
Asarina scandens	Maurandya scandens	1	TPLaccepted
Asarum europaeum		2	original
Asclepias curassavica		4	original
Asclepias exaltata		3	original
Asclepias incarnata		5	original
Asclepias syriaca		12	original
Asclepias tuberosa		3	original
Asimina triloba		11	original
Asparagus acutifolius		1	original
Asparagus aethiopicus		8	original
Asparagus asparagoides		4	original
Asparagus densiflorus		6	original
Asparagus officinalis		33	original
Asparagus officinalis ssp. prostratus	Asparagus prostratus	2	TPLsynonym
Asparagus oligoclonos		9	original
Asparagus schoberioides		15	original
Asperugo procumbens		3	original
Asperula cynanchica		5	original
Asperula involucrata	Asperula laevigata	1	TPLsynonym
Asperula odorata	Galium odoratum	4	TPLaccepted
Asphodeline lutea		6	original
Asphodelus aestivus		5	original
Asphodelus albus		1	original
Asphodelus ramosus	Asphodelus albus	1	TPLsynonym
Aspidistra elatior		7	original
Aspidium trifoliatum	Tectaria pica	1	TPLaccepted
Aspidopterys elliptica		2	original
Asplenium adiantum-nigrum		8	original
Asplenium antiquum		7	original
Asplenium auritum		3	original
Asplenium boltonii		1	original
Asplenium bulbiferum		1	original
Asplenium ceterach		6	original
Asplenium cuneifolium		3	original
Asplenium dimorphum		3	original
Asplenium fissum		1	original
Asplenium fontanum		3	original
Asplenium harpeodes		1	original
Asplenium hemionitis		2	original
Asplenium nidus		41	original
Asplenium onopteris		6	original
Asplenium ruta-muraria		18	original
Asplenium salicifolium		1	original
Asplenium scolopendrium		7	original
Asplenium septentrionale		4	original
Asplenium trichomanes		8	original
Asplenium viride		7	original
Aster alpigenus var. haydenii	Oreostemma alpigenum var. haydenii	1	TPLaccepted
Aster alpinus		3	original
Aster altaicus	Aster angustifolius	1	TPLsynonym
Aster amellus		2	original
Aster diplostephioides		1	original
Aster divaricatus	Croptilon divaricatum	1	TPLaccepted
Aster flaccidus ssp. flaccidus	Aster flaccidus	1	TPLaccepted
Aster foliaceus	Symphyotrichum foliaceum	2	TPLaccepted
Aster iinumae	Aster indicus var. pinnatifidus	1	TPLsynonym
Aster koraiensis		1	original
Aster lindleyanus	Symphyotrichum ciliolatum	9	TPLaccepted
Aster linosyris		3	original
Aster lowrieanus	Symphyotrichum cordifolium	9	TPLaccepted
Aster macrophyllus	Eurybia macrophylla	16	TPLaccepted
Aster occidentalis	Symphyotrichum spathulatum	1	TPLaccepted
Aster ptarmicoides	Solidago ptarmicoides	5	TPLaccepted
Aster puniceus	Symphyotrichum puniceum	9	TPLaccepted
Aster salignus	Aster auriculatus	1	TPLsynonym
Aster tataricus		8	original
Aster tongolensis		1	original
Aster tripolium		3	original
Aster yunnanensis		1	original
Asteriscus maritimus	Pallenis maritima	1	TPLaccepted
Astilbe biternata		4	original
Astilbe grandis		10	original
Astilbe japonica		5	original
Astilbe microphylla		4	original
Astilbe myriantha		4	original
Astilbe thunbergii		6	original
Astilbe thunbergii var. congesta	Astilbe odontophylla	2	TPLsynonym
Astilbe thunbergii var. fujisanensis		1	original
Astilboides tabularis		3	original
Astragalus albicaulis		5	original
Astragalus alopecuroides		3	original
Astragalus alopecurus		1	original
Astragalus alpinus		16	original
Astragalus austriacus		1	original
Astragalus chinensis		7	original
Astragalus cicer		2	original
Astragalus depressus		1	original
Astragalus exscapus		3	original
Astragalus falcatus		1	original
Astragalus frigidus		3	original
Astragalus glycyphyllos		7	original
Astragalus gummifer		1	original
Astragalus hamosus		1	original
Astragalus hymenostegis		1	original
Astragalus lusitanicus	Erophaca baetica subsp. orientalis	1	TPLaccepted
Astragalus membranaceus		33	original
Astragalus onobrychis		1	original
Astragalus penduliflorus	Astragalus alpinus	16	TPLsynonym
Astragalus ponticus		1	original
Astragalus schahrudensis		1	original
Astragalus sieversianus		1	original
Astragalus siliquosus		1	original
Astragalus vesicarius	Astragalus albicaulis	5	TPLsynonym
Astrantia major		2	original
Astrodaucus orientalis		1	original
Astrophytum asterias		5	original
Astrophytum capricorne		7	original
Astrophytum columnare	Astrophytum myriostigma	6	TPLaccepted
Astrophytum glabrescens	Astrophytum ornatum	4	TPLaccepted
Astydamia latifolia		1	original
Asyneuma campanuloides		1	original
Asyneuma canescens		2	original
Athamanta cretensis		2	original
Athamanta montana		1	original
Athamanta sicula		2	original
Athamanta turbith		1	original
Athanasia trifurcata		1	original
Athyrium atkinsonii		2	original
Athyrium clivicola		2	original
Athyrium distentifolium		4	original
Athyrium filix-femina		13	original
Athyrium frangulum		1	original
Athyrium nikkoense		2	original
Athyrium niponicum		5	original
Athyrium rupestre		2	original
Athyrium vidalii		3	original
Athyrium yokoscense		12	original
Atractylis cancellata		5	original
Atractylodes ovata		1	original
Atragene ochotensis	Clematis ochotensis	1	TPLsynonym
Atragene sibirica	Clematis sibirica	11	TPLsynonym
Atraphaxis caucasica		2	original
Atraphaxis frutescens		2	original
Atraphaxis spinosa		6	original
Atriplex halimus		22	original
Atriplex hortensis		4	original
Atriplex laciniata		2	original
Atriplex lampa		1	original
Atriplex littoralis		5	original
Atriplex patula		17	original
Atriplex rosea		4	original
Atriplex sagittata		1	original
Atriplex tatarica		1	original
Aubrieta columnae ssp. columnae	Aubrieta italica	1	TPLsynonym
Aubrieta deltoidea		3	original
Aubrieta gracilis		2	original
Aubrieta olympica		1	original
Aubrieta parviflora		3	original
Aubrieta pinardii		2	original
Aubrieta scardica		2	original
Aubrieta scyria		2	original
Aucuba japonica		11	original
Aurinia leucadea	Aurinia leucadea subsp. diomedea	1	TPLsynonym
Aurinia petraea		3	original
Aurinia saxatilis		8	original
Austrocylindropuntia subulata		3	original
Avena abyssinica		3	original
Avena barbata		8	original
Avena brevis		3	original
Avena fatua		20	original
Avena nuda		1	original
Avena sativa		12	original
Avena sterilis		6	original
Avena strigosa		5	original
Avenella flexuosa		7	original
Avenula bromoides	Helictotrichon bromoides	2	TPLaccepted
Avenula pratensis		1	original
Avenula pubescens		3	original
Avenula requienii	Helictotrichon requienii	1	TPLaccepted
Averrhoa carambola		11	original
Axonopus compressus		5	original
Axyris amaranthoides		1	original
Aylacophora deserticola		1	original
Azadirachta indica		23	original
Azolla filiculoides		8	original
Azolla pinnata		4	original
Azorina vidalii		53	original
Baccharis halimifolia		1	original
Bactris gasipaes		4	original
Baldellia ranunculoides		7	original
Ballota acetabulosa		4	original
Ballota hirsuta	Ballota africana	1	TPLsynonym
Ballota nigra		5	original
Balsamita major	Tanacetum balsamita	1	TPLaccepted
Balsamorhiza sericea		1	original
Bambusa balcooa		1	original
Bambusa vulgaris		18	original
Banksia serrata		2	original
Baptisia australis		3	original
Baptisia leucantha	Baptisia alba	1	TPLaccepted
Baptisia perfoliata	Rafnia perfoliata	1	TPLsynonym
Baptisia tinctoria		1	original
Barbacenia purpurea		1	original
Barbarea intermedia		1	original
Barbarea verna		4	original
Barbarea vulgaris		14	original
Barleria albostellata		1	original
Barleria cristata		4	original
Barleria prionitis		7	original
Barringtonia acutangula		4	original
Bartsia alpina		19	original
Basella alba		4	original
Basilima millefolium	Chamaebatiaria millefolium	2	TPLaccepted
Bassia hyssopifolia		3	original
Bassia prostrata		2	original
Bauhinia corymbosa		1	original
Bauhinia forficata		1	original
Bauhinia galpinii		5	original
Bauhinia hunanensis	Lasiobema championii	2	TPLsynonym
Bauhinia natalensis		2	original
Bauhinia variegata		14	original
Bauhinia yunnanensis		1	original
Beaucarnea recurvata		9	original
Beaumontia grandiflora		4	original
Beesia calthifolia		3	original
Begonia conchifolia		2	original
Begonia diadema		1	original
Begonia foliosa		2	original
Begonia glabra		1	original
Begonia masoniana		3	original
Begonia nelumbiifolia		2	original
Begonia radicans		2	original
Begonia rex		1	original
Begonia suffruticosa	Begonia dregei	2	TPLaccepted
Begonia ulmifolia		3	original
Belamcanda chinensis	Iris domestica	9	TPLaccepted
Bellevalia flexuosa		1	original
Bellevalia pycnantha		2	original
Bellevalia romana		3	original
Bellis perennis		14	original
Belvisia platyrhynchos		1	original
Bencomia caudata		1	original
Benincasa hispida		4	original
Bensoniella oregona		3	original
Bentinckia nicobarica		3	original
Berberis aristata		13	original
Berberis bergmanniae		1	original
Berberis buxifolia		2	original
Berberis canadensis		1	original
Berberis circumserrata		1	original
Berberis coxii		1	original
Berberis darwinii		2	original
Berberis edgeworthiana		1	original
Berberis gagnepainii		1	original
Berberis glaucocarpa		17	original
Berberis hookeri	Berberis hookeri var. viridis	1	TPLsynonym
Berberis insignis		4	original
Berberis jaeschkeana		12	original
Berberis julianae		1	original
Berberis koreana		1	original
Berberis manipurana		1	original
Berberis morrisonensis		1	original
Berberis pruinosa var. longifolia	Berberis pruinosa	1	TPLaccepted
Berberis sieboldii		1	original
Berberis soulieana		1	original
Berberis thunbergii		11	original
Berberis vernae		1	original
Berberis vulgaris		2	original
Bergenia ciliata		1	original
Bergenia crassifolia		2	original
Bergenia himalaica	Bergenia pacumbis	1	TPLaccepted
Bergenia purpurascens		4	original
Bergenia stracheyi		2	original
Berkheya purpurea		2	original
Berkheya rhapontica		1	original
Berlandiera lyrata		1	original
Berteroa incana		8	original
Berula erecta		12	original
Beta trigyna		1	original
Beta vulgaris		6	original
Betonica alopecuros		1	original
Betonica macrantha		1	original
Betonica officinalis		3	original
Betula alleghaniensis		16	original
Betula ermanii		4	original
Betula fruticosa		3	original
Betula glandulosa		18	original
Betula humilis		2	original
Betula lenta		7	original
Betula maximowicziana		2	original
Betula medwediewii		2	original
Betula nana		4	original
Betula papyrifera		23	original
Betula pendula		23	original
Betula platyphylla		7	original
Betula populifolia		6	original
Betula pubescens		5	original
Betula pumila		4	original
Betula schmidtii		3	original
Betula utilis		3	original
Bidens cernua		12	original
Bidens connata		1	original
Bidens frondosa		8	original
Bidens pilosa		3	original
Bidens tripartita		7	original
Bifora radians		1	original
Bignonia unguis-cati	Macfadyena unguis-cati	3	TPLsynonym
Billbergia decora		3	original
Billbergia kuhlmannii		1	original
Billbergia nutans		2	original
Billbergia porteana		1	original
Billbergia pyramidalis		2	original
Billbergia venezuelana	Billbergia rosea	1	TPLaccepted
Billbergia zebrina		1	original
Biophytum sensitivum		1	original
Bischofia trifoliata	Bischofia javanica	8	TPLaccepted
Biscutella cichoriifolia		1	original
Biscutella didyma		1	original
Biscutella laevigata		1	original
Biserrula pelecinus		3	original
Bismarckia nobilis		4	original
Bistorta affinis		1	original
Bistorta vivipara		24	original
Bituminaria bituminosa		6	original
Bixa orellana		7	original
Blackstonia perfoliata		5	original
Blechnum appendiculatum		1	original
Blechnum brasiliense		1	original
Blechnum discolor		1	original
Blechnum gibbum		2	original
Blechnum moorei		2	original
Blechnum occidentale		5	original
Blechnum punctulatum		1	original
Blechnum spicant		3	original
Blechnum tabulare		1	original
Bletilla striata		16	original
Blighia sapida		6	original
Blitum bonus-henricus		2	original
Bloomeria crocea var. aurea		2	original
Blossfeldia liliputana		7	original
Blumea balsamifera		15	original
Blumenbachia insignis		1	original
Blumenbachia latifolia		1	original
Blumeodendron kurzii		2	original
Blysmus compressus		7	original
Bocconia frutescens		1	original
Boehmeria biloba		1	original
Boehmeria cylindrica		6	original
Boehmeria macrophylla		1	original
Boehmeria nivea		9	original
Boehmeria platanifolia		2	original
Boehmeria tricuspis		1	original
Boesenbergia pandurata	Boesenbergia rotunda	5	TPLaccepted
Bolbitis heteroclita		2	original
Bolbitis repanda		1	original
Bolboschoenus maritimus		10	original
Bollaea canariensis	Pancratium canariense	10	TPLaccepted
Boltonia asteroides		1	original
Boltonia diffusa		2	original
Bolusanthus speciosus		3	original
Bomarea edulis		3	original
Bombax ceiba		6	original
Bongardia chrysogonum		2	original
Borago officinalis		12	original
Borago pygmaea		5	original
Borassodendron borneense		1	original
Borassus flabellifer		6	original
Bosea yervamora		2	original
Boswellia sacra		10	original
Bothriochloa ischaemum		6	original
Bougainvillea glabra var. alba	Bougainvillea glabra	5	TPLaccepted
Boussingaultia baselloides	Anredera baselloides	2	TPLaccepted
Bouteloua curtipendula		6	original
Bouteloua gracilis		6	original
Bowiea volubilis		8	original
Bowlesia incana		1	original
Boykinia rotundifolia		1	original
Brachychiton acerifolius		2	original
Brachypodium distachyon		6	original
Brachypodium retusum		1	original
Brachypodium rupestre		4	original
Brachypodium sylvaticum		10	original
Brachyscome iberidifolia		2	original
Bracteantha bracteata		1	original
Brahea aculeata		2	original
Brahea armata		1	original
Brahea brandegeei		1	original
Brassica elongata		1	original
Brassica gravinae		1	original
Brassica insularis		3	original
Brassica juncea		8	original
Brassica montana		3	original
Brassica napus ssp. rapifera	Brassica napus	37	TPLaccepted
Brassica nigra		19	original
Brassica oleracea		16	original
Brassica repanda		1	original
Brassica tournefortii		1	original
Braya alpina		2	original
Brickellia eupatorioides		1	original
Brickellia grandiflora		1	original
Bridelia glauca		1	original
Brimeura amethystina		2	original
Briza maxima		5	original
Briza media		8	original
Briza minor		8	original
Briza subaristata		2	original
Brocchinia tatei		2	original
Brodiaea californica		2	original
Brodiaea coronaria		2	original
Bromelia plumieri		2	original
Bromopsis inermis		1	original
Bromus arvensis		2	original
Bromus biebersteinii	Bromus inermis	25	TPLsynonym
Bromus catharticus		11	original
Bromus commutatus		6	original
Bromus diandrus		4	original
Bromus erectus		5	original
Bromus hordeaceus		15	original
Bromus japonicus		7	original
Bromus madritensis		2	original
Bromus purgans	Bromus kalmii	2	TPLaccepted
Bromus racemosus		6	original
Bromus ramosus		4	original
Bromus rigidus	Bromus diandrus var. rigidus	9	TPLsynonym
Bromus rubens		3	original
Bromus secalinus		4	original
Bromus squarrosus		1	original
Bromus sterilis		10	original
Bromus tectorum		13	original
Brosimum alicastrum		1	original
Broussonetia kazinoki		1	original
Broussonetia papyrifera		11	original
Browallia americana		1	original
Brownea ariza		1	original
Brownea grandiceps		1	original
Brucea javanica		13	original
Bruckenthalia spiculifolia		2	original
Brugmansia suaveolens		2	original
Brunfelsia nitida		2	original
Brunfelsia pauciflora		1	original
Bryonia alba		9	original
Bryonia cretica		6	original
Bryonia dioica		16	original
Bryophyllum fedtschenkoi	Kalanchoe fedtschenkoi	3	TPLsynonym
Bryophyllum pinnatum		1	original
Buchanania arborescens		3	original
Buchloe dactyloides		3	original
Buddleja alternifolia		1	original
Buddleja davidii		5	original
Bulbine frutescens		2	original
Bulbine semibarbata		2	original
Bungea trifida		1	original
Bunias orientalis		5	original
Bunium bulbocastanum		1	original
Buphthalmum salicifolium		2	original
Bupleurum aureum		2	original
Bupleurum baldense		1	original
Bupleurum candollei		1	original
Bupleurum falcatum		11	original
Bupleurum falcatum ssp. cernuum	Bupleurum exaltatum	1	TPLsynonym
Bupleurum fruticosum		3	original
Bupleurum longicaule	Bupleurum longicaule var. longicaule	2	TPLsynonym
Bupleurum longifolium		1	original
Bupleurum longiradiatum		4	original
Bupleurum montanum		3	original
Bupleurum multinerve		1	original
Bupleurum praealtum		6	original
Bupleurum ranunculoides		4	original
Bupleurum rotundifolium		1	original
Bupleurum salicifolium		3	original
Bupleurum scorzonerifolium		2	original
Bupleurum stellatum		2	original
Bupleurum tenuissimum		3	original
Bursaria incana		1	original
Bursera fagaroides		2	original
Bursera simaruba		2	original
Butea monosperma		8	original
Butia capitata		3	original
Butia yatay		2	original
Butomus umbellatus		8	original
Buxus balearica		2	original
Buxus microphylla		2	original
Buxus sempervirens		16	original
Cacalia suaveolens	Senecio suaveolens	4	TPLsynonym
Cachrys libanotis		2	original
Cachrys sicula		1	original
Caesalpinia bonduc		1	original
Caesalpinia decapetala var. japonica	Caesalpinia decapetala	3	TPLaccepted
Caesalpinia pulcherrima		8	original
Caesalpinia sappan		4	original
Caiophora lateritia		3	original
Cajanus cajan		12	original
Cakile maritima		7	original
Caladium bicolor		4	original
Calamagrostis arundinacea		5	original
Calamagrostis canescens		4	original
Calamagrostis epigejos		3	original
Calamagrostis lapponica		7	original
Calamagrostis neglecta ssp. neglecta	Calamagrostis stricta	2	TPLaccepted
Calamagrostis phragmitoides		1	original
Calamagrostis pseudophragmites		1	original
Calamovilfa longifolia		5	original
Calamus unifarius		2	original
Calandrinia ciliata var. menziesii		9	original
Calandrinia compressa		3	original
Calandrinia crassifolia		1	original
Calathea crotalifera		5	original
Calathea lutea		2	original
Calathea zebrina	Maranta bicolor	3	TPLsynonym
Calceolaria biflora		3	original
Calceolaria fothergillii	Calceolaria cavanillesii	1	TPLsynonym
Calceolaria plectranthifolia		1	original
Caldcluvia paniculata		1	original
Caldesia parnassifolia		2	original
Calendula arvensis		14	original
Calendula incana		2	original
Calendula maroccana		2	original
Calendula officinalis		11	original
Calendula stellata		4	original
Calendula suffruticosa		7	original
Calepina irregularis		4	original
Calibrachoa parviflora		2	original
Calicotome villosa		1	original
Calla palustris		5	original
Callerya atropurpurea		2	original
Calliandra haematocephala		1	original
Callicarpa americana		5	original
Callicarpa bodinieri		3	original
Callicarpa bodinieri var. giraldii	Callicarpa giraldii	2	TPLaccepted
Callicarpa dichotoma		1	original
Callicarpa japonica		2	original
Callicarpa longissima		1	original
Callicarpa membranacea	Callicarpa japonica var. angustata	2	TPLsynonym
Callicarpa mollis		2	original
Callicarpa pedunculata		1	original
Calligonum mongolicum		7	original
Callirhoe involucrata		3	original
Callisia fragrans		2	original
Callisia repens		1	original
Callistemon citrinus		8	original
Callistemon comboynensis		1	original
Callistemon lanceolatus		4	original
Callistemon linearis		3	original
Callistemon salignus		4	original
Callistemon viminalis		11	original
Callistephus chinensis		4	original
Callitriche hermaphroditica		10	original
Callitriche stagnalis		7	original
Callitris endlicheri		3	original
Callitris schwarzii	Widdringtonia schwarzii	3	TPLaccepted
Calluna vulgaris		15	original
Calocedrus decurrens		7	original
Calophyllum inophyllum		10	original
Calothamnus quadrifidus		3	original
Calotropis gigantea		6	original
Calpurnia aurea		5	original
Caltha palustris		25	original
Calvoa orientalis		1	original
Calycanthus chinensis		4	original
Calycanthus fertilis	Calycanthus floridus var. glaucus	2	TPLaccepted
Calycanthus floridus		10	original
Calycanthus occidentalis		6	original
Calyptronoma rivalis		3	original
Calystegia sepium ssp. sepium	Calystegia sepium	11	TPLaccepted
Camassia cusickii		3	original
Camassia leichtlinii		2	original
Camassia scilloides		2	original
Camelina microcarpa		4	original
Camelina sativa		5	original
Camelina sativa ssp. alyssum	Camelina alyssum	2	TPLaccepted
Camellia japonica		12	original
Camellia oleifera		6	original
Camellia reticulata		2	original
Camellia saluenensis		2	original
Camellia sasanqua		12	original
Campanula alpina		1	original
Campanula americana		2	original
Campanula armena		4	original
Campanula aucheri		2	original
Campanula barbata		1	original
Campanula bellidifolia		4	original
Campanula betulifolia		4	original
Campanula bononiensis		3	original
Campanula carpatica		2	original
Campanula cenisia		2	original
Campanula cochleariifolia		3	original
Campanula collina		1	original
Campanula elatinoides		2	original
Campanula erinus		6	original
Campanula fenestrellata	Campanula fenestrellata subsp. fenestrellata	2	TPLsynonym
Campanula foliosa		1	original
Campanula glomerata		3	original
Campanula hierapetrae		2	original
Campanula incurva		2	original
Campanula lactiflora		4	original
Campanula lanata		3	original
Campanula latifolia		7	original
Campanula makaschvilii	Campanula alliariifolia	3	TPLaccepted
Campanula mirabilis		2	original
Campanula orphanidea	Campanula bellidifolia	4	TPLsynonym
Campanula patula		9	original
Campanula peregrina		4	original
Campanula persicifolia		4	original
Campanula portenschlagiana		2	original
Campanula poscharskyana		2	original
Campanula primulifolia		2	original
Campanula pulla		1	original
Campanula pyramidalis f. alba	Campanula pyramidalis	18	TPLaccepted
Campanula raineri		2	original
Campanula rapunculoides		10	original
Campanula rapunculus		6	original
Campanula sarmatica		2	original
Campanula saxifraga		1	original
Campanula scheuchzeri		5	original
Campanula sibirica		2	original
Campanula speciosa		2	original
Campanula spicata		2	original
Campanula takesimana		5	original
Campanula thyrsoides		1	original
Campanula tomentosa	Campanula laciniata	2	TPLsynonym
Campanula tommasiniana		1	original
Campanula trachelium		9	original
Campanula versicolor		48	original
Campanula waldsteiniana		1	original
Campanula wanneri		1	original
Campanulastrum americanum		3	original
Camphorosma monspeliaca		4	original
Campsis radicans		7	original
Camptotheca acuminata		16	original
Campyloneurum phyllitidis		1	original
Campyloneurum xalapense		1	original
Cananga odorata		12	original
Canarina canariensis		4	original
Canarium acutifolium		4	original
Canarium ovatum		2	original
Canavalia ensiformis		5	original
Canavalia gladiata		4	original
Cancrinia discoidea	Microcephala discoidea	1	TPLsynonym
Canistrum triangulare		1	original
Canna brasiliensis	Canna indica	38	TPLaccepted
Canna flaccida		5	original
Canna glauca		13	original
Canna iridiflora		6	original
Canna jaegeriana		2	original
Canna paniculata		7	original
Canna tuerckheimii		16	original
Canna x generalis		3	original
Cannabis sativa		19	original
Canthium dicoccum	Psydrax dicoccos	5	TPLaccepted
Capparis spinosa		3	original
Capsella bursa	Capsella bursa-pastoris	18	TPLaccepted
Capsella bursa-pastoris		18	original
Capsella rubella		29	original
Capsicum annuum var. glabriusculum		4	original
Capsicum baccatum		44	original
Capsicum baccatum var. praetermissum		2	original
Capsicum chacoense		3	original
Capsicum chinense		178	original
Capsicum frutescens		62	original
Capsicum pendulum	Capsicum baccatum var. pendulum	9	TPLaccepted
Capsicum pubescens		5	original
Capsicum schottianum		1	original
Caragana arborescens		6	original
Caragana boisii		1	original
Caragana brevispina		2	original
Caragana chamlagu	Caragana sinica	4	TPLaccepted
Caragana decorticans		3	original
Caragana frutex		2	original
Caragana gerardiana		1	original
Caragana microphylla		4	original
Caragana pygmaea		2	original
Caragana spinosa		1	original
Caragana tragacanthoides		1	original
Caragana turkestanica		1	original
Caragana ussuriensis		1	original
Carapa guianensis		2	original
Carapichea ipecacuanha		1	original
Cardamine alpina		2	original
Cardamine amara		3	original
Cardamine bulbifera		1	original
Cardamine hirsuta		66	original
Cardamine impatiens		11	original
Cardamine kitaibelii		1	original
Cardamine pentaphyllos	Cardamine digitata	1	TPLsynonym
Cardamine pratensis		19	original
Cardamine resedifolia		6	original
Cardamine trifolia		1	original
Cardaminopsis halleri	Arabidopsis halleri	1	TPLaccepted
Cardiocrinum cordatum		3	original
Cardiocrinum giganteum		3	original
Carduus carlinoides		3	original
Carduus chrysacanthus ssp. chrysacanthus	Carduus carlinoides	3	TPLsynonym
Carduus crispus		4	original
Carduus defloratus		4	original
Carduus nutans		6	original
Carduus tenuiflorus		7	original
Carex acuta		3	original
Carex acutiformis		7	original
Carex appalachica		5	original
Carex aquatilis		26	original
Carex arctata		12	original
Carex arenaria		11	original
Carex atherodes		3	original
Carex atrata		3	original
Carex atrosquama		3	original
Carex aurea		7	original
Carex baldensis		2	original
Carex binervis		7	original
Carex bohemica		2	original
Carex brachystachys	Carex strigosa	3	TPLsynonym
Carex brizoides		2	original
Carex buxbaumii		4	original
Carex buxbaumii ssp. mutica	Carex adelostoma	2	TPLaccepted
Carex canescens		12	original
Carex capillaris		37	original
Carex capitata		11	original
Carex chordorrhiza		14	original
Carex crawei		2	original
Carex curvula		1	original
Carex davalliana		2	original
Carex depauperata		5	original
Carex diandra		22	original
Carex digitata		3	original
Carex distans		18	original
Carex disticha		4	original
Carex divisa		7	original
Carex divulsa		8	original
Carex divulsa ssp. leersii	Carex canescens	12	TPLsynonym
Carex eburnea		5	original
Carex echinata		14	original
Carex elata		4	original
Carex elongata		3	original
Carex extensa		12	original
Carex ferruginea ssp. ferruginea	Carex ferruginea	1	TPLaccepted
Carex ferruginea ssp. tenax	Carex tenax	4	TPLsynonym
Carex firma	Carex strigosa	3	TPLsynonym
Carex flacca		7	original
Carex flava		7	original
Carex foetida	Carex baldensis	2	TPLsynonym
Carex frankii		3	original
Carex grayi		4	original
Carex hartmanii		1	original
Carex heleonastes		4	original
Carex hirta		8	original
Carex hispida		1	original
Carex hostiana		10	original
Carex intumescens		8	original
Carex kobomugi		5	original
Carex laevigata		11	original
Carex lasiocarpa		6	original
Carex lepidocarpa		2	original
Carex leporina		2	original
Carex limosa		10	original
Carex lupulina		4	original
Carex lurida		4	original
Carex macloviana		7	original
Carex macloviana var. thermarum	Carex leporina	2	TPLsynonym
Carex media		6	original
Carex melanostachya		4	original
Carex mertensii		4	original
Carex morrowii		1	original
Carex muricata ssp. lamprocarpa	Carex muricata	4	TPLaccepted
Carex muskingumensis		5	original
Carex nigra ssp. nigra	Carex nigra	18	TPLaccepted
Carex obnupta		2	original
Carex otrubae		6	original
Carex ovalis		11	original
Carex pairae		9	original
Carex pallescens		10	original
Carex paniculata		6	original
Carex parviflora		1	original
Carex pauciflora		8	original
Carex paupercula		2	original
Carex pendula		14	original
Carex phaeocephala		3	original
Carex pilulifera		6	original
Carex praecox		1	original
Carex pseudocyperus		13	original
Carex pulicaris		8	original
Carex pumila		4	original
Carex punctata		10	original
Carex remota		8	original
Carex retroflexa		5	original
Carex riparia		4	original
Carex rostrata		15	original
Carex rupestris		55	original
Carex secta		1	original
Carex sempervirens		1	original
Carex sparganioides		8	original
Carex spicata		6	original
Carex strigosa		3	original
Carex supina		1	original
Carex sylvatica		9	original
Carex tenera		1	original
Carex tribuloides		1	original
Carex vaginata		22	original
Carex vesicaria		9	original
Carex viridula ssp. oedocarpa	Carex demissa	11	TPLsynonym
Carex viridula ssp. viridula	Carex viridula	11	TPLaccepted
Carex vulpina		2	original
Carex vulpinoidea		10	original
Carica papaya		22	original
Carica pubescens	Vasconcellea cundinamarcensis	6	TPLsynonym
Carissa bispinosa		2	original
Carissa carandas		3	original
Carissa edulis		2	original
Carissa macrocarpa		5	original
Carlina acanthifolia ssp. acanthifolia	Carlina acanthifolia	3	TPLaccepted
Carlina acaulis		1	original
Carlina lanata		3	original
Carlina salicifolia	Carlina falcata	3	TPLsynonym
Carlina vulgaris		6	original
Carludovica drudei		2	original
Carludovica palmata		4	original
Carpanthea pomeridiana		2	original
Carpentaria acuminata		2	original
Carpenteria californica		3	original
Carpinus betulus		16	original
Carpinus caroliniana		18	original
Carpinus japonica		7	original
Carpinus laxiflora		10	original
Carpinus orientalis		5	original
Carrichtera annua		1	original
Carruanthus caninus	Carruanthus ringens	1	TPLaccepted
Carruanthus ringens		1	original
Carthamus lanatus		2	original
Carthamus tinctorius		14	original
Carum carvi		6	original
Carya aquatica		1	original
Carya cordiformis		6	original
Carya glabra		5	original
Carya laciniosa		1	original
Carya ovata		5	original
Carya pecan	Carya illinoinensis	2	TPLaccepted
Carya tomentosa		3	original
Caryopteris divaricata		1	original
Caryopteris incana		3	original
Caryota mitis		12	original
Caryota ophiopellis		4	original
Caryota urens		3	original
Caryota zebrina		1	original
Casimiroa edulis		4	original
Cassia arnottiana	Senna arnottiana	1	TPLaccepted
Cassia fistula		10	original
Cassine capensis	Cassine peragua	3	TPLaccepted
Castanea crenata		9	original
Castanea mollissima		10	original
Castanea sativa		20	original
Castanopsis cuspidata		1	original
Castilla elastica		2	original
Castilleja miniata		1	original
Casuarina cunninghamiana		7	original
Casuarina equisetifolia		12	original
Catabrosa aquatica		10	original
Catalpa bignonioides		6	original
Catalpa ovata		1	original
Catalpa speciosa		6	original
Catananche caerulea		5	original
Catananche caespitosa		2	original
Catapodium loliaceum	Catapodium marinum	5	TPLaccepted
Catapodium rigidum		7	original
Catha edulis		6	original
Catharanthus roseus		14	original
Cattleya aurantiaca		2	original
Catunaregam spinosa		9	original
Caucalis platycarpos		2	original
Caulophyllum robustum		5	original
Caulophyllum thalictroides		12	original
Cautleya gracilis		4	original
Ceanothus americanus		2	original
Ceanothus arboreus		2	original
Ceanothus cuneatus	Ceanothus cuneatus var. cuneatus	4	TPLsynonym
Ceanothus impressus		1	original
Ceanothus thyrsiflorus		2	original
Cedrela odorata		4	original
Cedrela sinensis	Toona sinensis	50	TPLaccepted
Cedronella canariensis		3	original
Cedrus atlantica		7	original
Cedrus deodara		21	original
Ceiba pentandra var. indica	Ceiba pentandra	4	TPLaccepted
Celastrus angulatus		1	original
Celastrus orbiculatus		6	original
Celastrus rosthornianus		1	original
Celastrus scandens		7	original
Celosia argentea		16	original
Celsia arcturus	Verbascum arcturus	2	TPLaccepted
Celtis aetnensis	Celtis tournefortii	10	TPLaccepted
Celtis africana		2	original
Celtis australis		2	original
Celtis bungeana	Celtis sinensis	7	TPLsynonym
Celtis occidentalis		4	original
Celtis philippensis		6	original
Celtis sinensis		7	original
Celtis tetrandra		2	original
Centaurea arbutifolia	Cheirolophus arbutifolius	1	TPLaccepted
Centaurea aspera		1	original
Centaurea behen		4	original
Centaurea benedicta		3	original
Centaurea calcitrapa		1	original
Centaurea carpatica	Centaurea mollis	2	TPLsynonym
Centaurea clementei		1	original
Centaurea collina		1	original
Centaurea cristata		2	original
Centaurea crocodylium		1	original
Centaurea cyanoides		1	original
Centaurea cyanus		11	original
Centaurea deusta		2	original
Centaurea diffusa		4	original
Centaurea diluta		3	original
Centaurea granatensis		1	original
Centaurea jacea		4	original
Centaurea jacea ssp. gaudinii	Centaurea alba	3	TPLsynonym
Centaurea kotschyana		1	original
Centaurea macrocephala		2	original
Centaurea maculosa	Centaurea podospermifolia	3	TPLaccepted
Centaurea melitensis		5	original
Centaurea mollis		2	original
Centaurea montana		2	original
Centaurea nigra		7	original
Centaurea nigrescens		2	original
Centaurea pectinata		1	original
Centaurea pullata		1	original
Centaurea scabiosa		4	original
Centaurea solstitialis		2	original
Centaurea sonchifolia	Centaurea polyacantha	1	TPLsynonym
Centaurea stoebe		2	original
Centaurea sulphurea		1	original
Centaurium erythraea		9	original
Centaurium littorale		1	original
Centaurium pulchellum		4	original
Centaurium scilloides		13	original
Centaurium tenuiflorum		2	original
Centella asiatica		24	original
Centranthus ruber		9	original
Centratherum muticum	Centratherum punctatum	6	TPLaccepted
Centunculus minimus		1	original
Cephalanthus occidentalis		3	original
Cephalaria leucantha		2	original
Cephalaria radiata	Cephalaria leucantha	2	TPLsynonym
Cephalaria uralensis	Cephalaria leucantha	2	TPLsynonym
Cephalotaxus fortunei		6	original
Cephalotaxus sinensis		14	original
Cerastium alpinum		14	original
Cerastium arvense		7	original
Cerastium beeringianum		12	original
Cerastium boissierianum	Cerastium tomentosum	2	TPLsynonym
Cerastium brachypetalum		1	original
Cerastium fontanum		13	original
Cerastium glomeratum		7	original
Cerastium pumilum		3	original
Cerastium semidecandrum		2	original
Cerastium tomentosum		2	original
Cerasus avium	Prunus avium	17	TPLaccepted
Cerasus besseyi	Prunus pumila var. besseyi	1	TPLaccepted
Ceratocapnos claviculata		4	original
Ceratocarpus arenarius		2	original
Ceratocephala falcata		1	original
Ceratonia siliqua		5	original
Ceratophyllum demersum		21	original
Ceratophyllum submersum		10	original
Ceratopteris thalictroides		7	original
Ceratotheca triloba		3	original
Cerbera floribunda		5	original
Cercidiphyllum japonicum		8	original
Cercidiphyllum magnificum		2	original
Cercis canadensis		4	original
Cercis chinensis		12	original
Cercis griffithii		1	original
Cercis siliquastrum		5	original
Cercocarpus betuloides		1	original
Cercocarpus montanus		1	original
Cereus hildmannianus		1	original
Cerinthe glabra	Cerinthe alpina	3	TPLsynonym
Cerinthe major		1	original
Cerinthe minor		1	original
Ceropegia woodii		1	original
Cestrum elegans		1	original
Cestrum nocturnum		10	original
Cestrum parqui		1	original
Chaenomeles cathayensis		9	original
Chaenomeles maulei	Chaenomeles japonica	3	TPLaccepted
Chaenomeles sinensis		3	original
Chaenomeles speciosa		20	original
Chaenorhinum minus		6	original
Chaerophyllum aromaticum		2	original
Chaerophyllum aureum		2	original
Chaerophyllum coloratum		1	original
Chaerophyllum elegans		1	original
Chaerophyllum hirsutum		2	original
Chaerophyllum macropodum		1	original
Chaerophyllum temulum		15	original
Chaerophyllum villarsii		1	original
Chamaecyparis formosensis		5	original
Chamaecyparis lawsoniana		10	original
Chamaecyparis obtusa		12	original
Chamaecyparis pisifera		11	original
Chamaecyparis thyoides		1	original
Chamaecytisus austriacus		1	original
Chamaecytisus purpureus		2	original
Chamaedaphne calyculata		5	original
Chamaedorea brachypoda		1	original
Chamaedorea costaricana		1	original
Chamaedorea elegans		2	original
Chamaedorea geonomiformis		1	original
Chamaedorea klotzschiana		1	original
Chamaedorea metallica		1	original
Chamaedorea microspadix		2	original
Chamaedorea neurochlamys		1	original
Chamaedorea oblongata		1	original
Chamaedorea seifrizii		7	original
Chamaedorea tepejilote		1	original
Chamaemelum nobile		9	original
Chamaerops humilis		9	original
Chamaespartium sagittale	Genista sagittalis	2	TPLaccepted
Chamaesyce humifusa	Euphorbia humifusa	4	TPLaccepted
Chamaesyce prostrata	Euphorbia prostrata	5	TPLaccepted
Chambeyronia macrocarpa		3	original
Chamorchis alpina		2	original
Chartolepis glastifolia	Centaurea glastifolia	1	TPLaccepted
Chasmanthe floribunda		1	original
Chasmanthium latifolium		8	original
Chassalia curviflora		1	original
Cheilanthes argentea		3	original
Cheilanthes bonariensis		2	original
Cheilanthes lanosa		1	original
Chelidonium majus		17	original
Chelone glabra		5	original
Chelone lyonii		3	original
Chelone obliqua		3	original
[truncated: 6,384 more rows]
